# Supplementary material for: De Novo Transcriptome Analysis to Identify Anthocyanin Biosynthesis Genes Responsible for Tissue-Specific Pigmentation in Zoysiagrass (Zoysia japonica Steud.)
Source: PLoS One. 2015 Apr 23;10(4):e0124497. doi: 10.1371/journal.pone.0124497 (PMC4408010; doi:10.1371/journal.pone.0124497)
Supplement: S3 Table — (XLSX) [file pone.0124497.s023.xlsx]

## Sheet: Sheet1
Table S3. Ortholog set of AJ and GZ.
aj_transcriptome	sequence	gz_transcriptome	Identity	hit_length	annotation
aj_contig_1	ATCGGTTACGGTTGTTATTTCCTTTCTGAATTGTAGGATCTGAACTTTTTTGGGGTAAGACCACCCCACTTCTATAAAAAGAGACCTCAGGCCGATTGAGAGGTATCCAATCGACTCTAAAAACTTTACTTTACGTTTTTTTTACCTCTCCAAATGCTAATCCCCTTATTCGACTTTTTACCTCTCCAAACCCTAATCCCCTTACTCGACTCCAATTCCGTTCTTCTTCCGTCCCGGCGATGTGTGAAGGTGATCCGGCTGGC	gz_contig_21419	100	260	#N/A
aj_contig_2	AATTGCCATTCCAATCACTTCACTTTTCTACACAAGCTGGGATAATGCCATACTAGCATATACACACTTTGACAATCGCTCAATAAACCAGATACATAGATGCACTCCAGGCAAGAAAAGACGCGGTTAGCATTCATACCGAGTAGCTGCACAGATGGGGGGCTTTAAGCTTATGGGGATTTTACAAGAAGATGCTCATACAGTTTAGTGGGGTTGTTGTGTATAATTGACGGGTTTGCATCTTCCAGGCGCTCAGCAAGAGACCTCAGAATGGAGACCAGATGCCGTGTGTTTTTGGTACATCGGCACACTAGGTCTAAGTATTGCGCAGCCTCCTGCGGAAGGAGTCCAGTCATGAAGAACGGGAAGAGCTTTGAGTGTGTCACCTCCATTGTACCA…	gz_contig_9606	100	722	gi|414879584|tpg|DAA56715.1|
aj_contig_3	ACATCATATGTACAATCTGGTCCGACATTTGATTGTACCTTGAGCTTATTGCAAGTACATGGCTGGAAGACTGGTAGAGGAATTTCTAGGACTCTATCAAAGTAGGTGATGACAGCAGCGATTAATATGTTTCAGGTACTAATTAAATATCCTCCGTGTTAATATTATCTTCTATGACTTCAATGCACGAGCCAGCTGACATCCCCGAAGACATTGCCTCTGCAAGTTGCGATCTAGCTTTTTCATGGCGACGAAGCGTGAGGACTGTATTCAGCACAGCCCACCTCACTTGTGAATCAGCTTTCTTCTGGGTAAAACCCAGACTCTTGAGCAGTCCATCGAGCTTATTAATGTCAGCTAATCCTCCTTCTGCCATTCCATACAAAAGATACTCAGTCG…	gz_contig_15354	98.1	473	gi|242057859|ref|XP_002458075.1|
aj_contig_5	CTTTTTCTTACTCCGGCAAAAAGGGGTCCGTGAATCCATCTCACAGGCCTCCCGAGGCCAAGACCAAAATTACAAGGGTCAAAAAGGCAGGTTCTAATCCTAGTAGGAGAATAGGCCGGCGACCAAGAGAGGACGCCAAGAAAGCGATTTTTTTCTTCTTTTTTCCGAATAAAAACCCCGGAAAACNNNNNNNNNNNNNNNNNNNNNNNNNNNNNNNNNNNNNNNNNNNNNNNNNNNNNNNNNNNNNNNNNNNNNNNNNNNNNNNNNNNNNNNNNNNNNNNNNNNNNNNNNNNNNNNNNNNNNNNNNNNNNNNNNNNNNNNCACCGAAACACCAAAACTGGATCCCCAAACGGATCGAACGGCGCGGTGGAAATCGAATGAAAACGAGGAAAAATTGGG…	gz_contig_21764	100	188	gi|357115058|ref|XP_003559309.1|
aj_contig_6	CGGGAGCTTCGACAGGAGGAAGAAGAGGAAGACGGAGGACGGGGATGGGATCAAGAGCTGCAGCTGCAAGAAGTCCAGGTGCCTCAAGCTCTATTGCGTATGTTATGCTTCTGGATCACATTGCACTGAATCATGTGGATGTGAACCTTGTCTCAACAAGCCTATTCAAGGTGCTCAACGGAGTGCACCTGCACCAGTTTTGCCTCTGAAATTTGTGAAAACATCAGAGACTGGTCAAGATTTACTGGAGCAACCTTTAAGATCCCCCATGGATATTTTTAGAAGAAAATGCACCTGCAAGAAATCAGGCTGCCTTAAGAAGTATTGTGACTGCTACCAGGGGATGGCGGGATGTTCAATCAACTGTAAGTGTGAGGATTGTAAGAACCCGTTTGGAAG…	gz_contig_14089	99.38	959	gi|115489472|ref|NP_001067223.1|
aj_contig_7	GAACCATCTCTGCGGTGTAATCCTCAAGTGCTGCGACATCGACCTCCAGCAGCCCAAAGGTCTCGAGGATCCAGAGGTCCTCGCCAGGGAGACCGTCTTTAGCGTGAGCGAGATCGAGGCGTTATATGAGCTGGTTAAGAAGATTAGCAGTGCCGTTATTGATGATGGGCTGATCAACAAGGAGGAGTTTCAGTTGGCGCTGTTCAAGACAAGTAAGAAGGGGAGTTTATTTGCTGATCGTGTATTTGATTTATTTGACACGAAACACAATGGGATTCTAGGATTTGAGGAATTTGCCCGTGCACTCTCAGTATTTCATCCCACTGCTCCTCTTGATGAGAAAATTGACTTTTCTTTCCAGTTATATGACCTCAAGCAACAAGGCTTCATTGAAAGACA…	gz_contig_11591	100	527	gi|115454207|ref|NP_001050704.1|
aj_contig_9	GATGAGTACAAACACATGCTGTGCCAGGCTACTGAACCACTATCTACATTCTTGCAGTATATAACATATGGGCACATGATTGATAATGTTGTCCTCATTGTTACCGGGACATTGCATGAGAGAGATGTTAATGAACTGTTGGAGAAATGTCATCCATTGGGCATGTTTGACAGCATTGCATCGCTTGCGGTTGCTCAGAACATGCGTGAGCTTTATAGATTGGTGCTAGTCGATACTCCCCTGGCCCCTTACTTTTCAGAGTGCATTACATCTGAGGATTTGGATGACATGAATATTGAGATTATGAGGAACACTCTCTACAAAGCTTATCTTGAGGATTTTTACAAATTTTGCCAGAAACTCGGCGGTGCAACAGCTGAGATCATGAGTGATCTCCTT…	gz_contig_2847	100	1070	gi|115437984|ref|NP_001043429.1|
aj_contig_10	CTCCTCATAATATTTGACAGGCAGACTTCAATCTGAATGAAAGGTTTGCTACACGGGTACAAAATTCAGGAGTACAAACAAATTAAGCAATACGATTTCCTCAGGGCTCCAAAACTAACTTAGAAGACCATATCATGGGGCTTGTCGCCCTTCCTGAGAGAGAACCGGGCACCAAGATAAGTTTTCAGGTCTGGAACCGCCTCAATAGCCTTGATCAGAGCAGCATCCACAGCCTTCTGGTCATCCTTCTTGAAGTCGGGAAGAGACTTGGCAGCCTCCTTCTCTGTCTCAAAAAGCTCACCCTCAGTCTTCTTCACCCTCTTCTTCTTCTCCCTGGCGAAGTACTTGTCATCAAACTTCGATACATCAACGCTAGAGATGTCGACCTTGGTGGAAGTG…	gz_contig_9127	100	623	gi|212276074|ref|NP_001130513.1|
aj_contig_12	CCAAAAGGTGCACATGATGCGTCAACATTCCAAAAGAAGCTTGCTGTTGAGTGCATATTCTGTTCAGCTTGCATTCGGTTCGCTGAGTTTTGCCCTCAAGAGGGAATAACAGAAAAACTTTGGATTGGTCTGGAAAGTTTCGTATTTGATTGGCTTATTAATGCAGACAGGGTTGTCAGCCAAGTAGATTATCCTTCATTGGTCGACTTACGGAGTCTGCTCTTAGATCTTGTTGCTCAGCTTTTAGGAGCTTTATCACGCATCAGGTTTAGTTCTGTGACAGAAAGGTTTTTCATGGAGCTTAATACACGACGTATTGATACACCTGTTGCTAGAAGTGAGACACTCAGCATAATCAATGGGATGCGCTACCTTAAGTTGGGGGTAAAGACAGAGGGG…	gz_contig_3539	95.07	2189	gi|242063612|ref|XP_002453095.1|
aj_contig_13	ACCGCGCGGTCTCCACTTTCAAGGCAATGCATGGTAAGAATGCCCAAGCAGCATCATGTGTGAACGAAAAGCCAGACCCTCCAGCTTCTGTGGAACAAGAGTCGGGGGAGGCAACAGATGAAAAGAATGAAAACTCTAGCGAGACCCTTAAGCAGCCCGCTGAAGAAAGCAAGACAATTGGGCGAGCTCCTCTTCATGAAACTGATCCAGGCAAAGAGACACATGTTTCAGAGTCTAAGACACTCTCCGCAGATGTTGCTGATGCTGACAGAAATATAAGCTCAAGCCAGCAAGGGGAGCACAATGAATTGCTCAGACGATACTATGAACTTGAGGAGCAGAGTCGGAATGTTCTCCAGCAGCTCCAACAGACAAACTATTGGGATTCTCAAGCACCAT…	gz_contig_8608	99.68	923	gi|357137124|ref|XP_003570151.1|
aj_contig_14	CAAACCTGAAACAGTTTGCTCGGTTGTGGACTTGAGAGGAGGTTGTGCACTTTGATGGCACAGAATGCTGAGTCGGTGTGAATGTAATGATGCATGGGCATAGCCTGCTTCTGCGGTATAGTGGCTATTGAGCTGTGCTCTATGGGAGGAATTGCTGAATGTGGTTTGAACGTTGACACTAAAGCTTCACCACGTCGCTCGGCCATAGAGAAAGCTCAGGAGGAGCTAAGGCAGGAATATGATGTCCGTGAAGAACGGAGGAGAGAGCTTGAGTTTCTTGAGAAGGGAGGAAATCCCTTGGATTTCAAACTCAGCCTTGTAGCATCGCTTAGTGTACAGTCCACTTCTGTGACAGACCAAATCGCTGAGCAAAATGTGATAAGTGAGGCTAAAGGCAGC…	gz_contig_816	99.68	4640	gi|242053371|ref|XP_002455831.1|
aj_contig_15	CGCGGTTCACACTACTGAGCGAGTGCTTTTGGGTGCAGGACAAAGTCATTCTGCTGCACACTGTTTCCTGCCAAAACCGCTTCCTTGGTACTGAGGTCCACAAGTGCATGGGCGTGAATTTGCATGCTTTTGTAAATTTTGCTTGGCACTGAGGTCGGTGCACGTTAAAATGGGTTCACGGTCAAAGAATGAAGACGACAAGGCCCTTGTTTTGTGCCAGGAAAGAAAACGATTTGTTAGAGAAGCTCTTGATGGAAGATGTGCCTTTGCTGCTGCTCACTTTGCTTATATTCAGTCGCTGAGGCATGTAGGATTTGCTCTGAGAAAATTTGTAGAGCCTGAAGCGCCAACAGATTCTTCCCTGTACACATCAACTTCCGCGACACCAGAGCCTCCTGC…	gz_contig_4102	99.35	2771	gi|242035903|ref|XP_002465346.1|
aj_contig_16	CAGGCCCGCAGCTGCCGCAACCGTTCGCCGTTGCCGGAGAAGAAGAGACCGACGCCATGGCACCGGAGCCCGAGGAGGATCTGATGAACGAGAAGAACCCTCGCCCCCTGGACGAGGACGACATCGCCCTCCTGAAGACCTACGGGCTTGGACCGTACTCGACCAGCATCAAGAAGGTCGAGAAGGAGATAAAAGAGATGGCCAAGAAGATCAATGATCTCTGCGGCATCAAGGAGTCTGATACAGGGTTGGCACCACCAAGCCAATGGGATCTTGTCTCAGACAAGCAGATGATGCAGGAAGAGCAACCATTGCAGGTTGCAAGGTGCACTAAAATCATCAGTCCTAATACTGATGACGCCAAGTATATCATAAATGTGAAACAAATTGCAAAGTTTG…	gz_contig_6264	100	1322	gi|115466876|ref|NP_001057037.1|
aj_contig_17	GCTCGCCGTCCCGACACAATGGCAGACGTCCAGTTAGGGTGTTACACTATGCAGTCCCATGGAACCAAGTTGGCAAGATTGCACATGTATGACTGGATAATACTTCTGCTCCTCGCTGTGATAGATGGACTGTTGAATTTAATTGAACCTTTCCACCGCTTCGTGGGACGGGACATGATGACTGACTTGAGGTATCCGATGAAGGGCAATACCGTTCCCTTTTGGGCTGTTCCGCTAATTGGAATTGTGCTGCCATGCGCTATCTTTGTTGGAATTTACTTCAAAAAGAAGAATTTCTATGATTTGCACCATGGCATACTGGGGATTCTATATTCGGTACTCATAACTGCAGTGATTACTGATGCAATTAAGGATGGTGTTGGTCGCCCACGTCCAGAT…	gz_contig_8921	99.4	998	gi|357157977|ref|XP_003577977.1|
aj_contig_18	AGCCGCTCCCCCTACTCCAGGAGAAAAACTCGATCTCCTTCTCCAAGATGGGATACAAGCTATTCTCCAACTCCTAGGAGGCCTAGAAGCCCTACATCCCCAAGGCGACATAGAAGCCGGCGAAGCCGGAGCAGCACTAGTTCTGTCGTGAATAACTCATCCGGTTCAAACCTGGGGTCAGAACAAAACAGTTTGATTATAAAGCAAAGGAAAGAGGAGGAAGAAAGGAAAAGGCATCAAAAGGAAGAAGAGTTCAAGCTTTTGGAAGAGGAGCTTGCTAGGAAAATTGAGGAAGCTATAAGTAAAAATGTTGAGGAACGTTTAAACTCTGATGAGGTAAAACATGAAATAAATCGTCGAATTGAGGAGGGCATTAGAAAGTTATTTGATGAGGTTGAT…	gz_contig_3967	97.65	509	gi|242064506|ref|XP_002453542.1|
aj_contig_19	ATTTTAAGTGGTCTCCCTAACGAAACAGATTATTTTGCTAAACTCAACAAACTGTTGAGTCATGATTTGCAGTAAAATAGAAGACATGTATAGTAGAGTAGCACAGCCATTGGTACAGTAGAGGAATAAGAGCCAGCAAGAAACTAAATCAAGAAATTCTTCAAGTAGTGGCATGCGCTGATTGAACAACAATCAAATAGATGGAAATTTTATACTGCATGCACTGAACTAAATGAAGAAATGATTCGATTTATCATTGTAAAATTCCACTGTTGCCTGTTAGTCTCTCAAAACTTTCATTTGAAGTTCCTTCCTTGTAACAGAGACATTGGTCCAACGCCCAGCTTCAGCATAGAGGTTCGACAAAGCTACTTTGGCTGCTCCATGGCACAGGGATTG…	gz_contig_6436	100	500	gi|115436706|ref|NP_001043111.1|
aj_contig_20	GTGATTTCATTAAGCTGTTGTTAGGTAATATTTCAGTTGAAAATTATTTGGCACCGGAACACCATCGTTGGTCTACCATGCCCTATAGAATATTAGTTGCCATGTTAATTCTCTTGATTAGCAGTTCTGATTCCTTTGGATAACTGCACTATACGTTAACAGTAAGTTCTGCAGTATAATTTGAGCATCCTCTTTAACTGTACTGTATGTTAGTAAGTTCTATAATTTGAGCATTCTTATTATGAGCGCCTCTATAGTTTAGACAGCTATAATTTGCCTCTATAGTTTCATTGGGCTATTATTTAAACAGCTGCTTGTTTGTTTATCAACATTGACGTCTACTGCATTATGTTTATTTTCTGCATAGCTACCATTATATTTGGGTTATTTTGTGAAATT…	gz_contig_701	100	1433	gi|115484017|ref|NP_001065670.1|
aj_contig_22	GGTTGGTGTTGCTGGCGCGGGATGTGGCCTCCATGGAACGCTTGTTGTTGTTGTTGTTGTTGTTCTTGGCGTCGTTCGTCGCGGCACCGGTCATGGTCGCGTTGTGCTGCGAGAAGAGGCTCCCGGGTGCAGTAGTGAGGCTTGCGGTGGTGGCGGGAGGCGCCGGCGAGGGGTTTCTCCGGCTGGTGCTGTCGGCACCGAAGTTGAGGATCTCGCCGGACTCGGGCTTGAAGAACGGCGGACCCGAGATCATGGAAGGATTGGACGCGGCGAACTCGGAGAAGTTGAGCTCCCGGCGGAACGGGCCCTGCTGCGCCTGACTATGCTGCTGGTGCTGGTGGCGCTGCGGCGCCACAGGAACCGCCGGCTGCGGTGCAGAGGGCGCTTGCACGGAGGGGC…	gz_contig_6388	100	182	gi|4321762|gb|AAD15818.1|
aj_contig_23	TGTGGTTAAGTGATGAAGATCCACTACCAAATGAATATCACGCCATCCTAGCATGTGTAAGCCTGAGGTTTGGTACATGGTTAATGGAGTATACTCTCAGCTATAAAGGGTTAAATAAGGTGAGCTGTCGGACGGAAACATTGAATTAATTAACTAAAATGAAGAATGCAACGGTTGTGTAATGGAGGTAATGTGTTCTGAGCCTTTGCGATTGTCATGTCATATTTGCAGATCATCCAGTGACAACTCCTCAGTTGATAACATCTTTAGTTTAGTTATGAACTGTGGTGGATCATCAAGACTAGTAGAGCCGAGGATGATTTCTCTCTTTAGTTTGCCAGTTAGCTTGTGAGCAGTTCGTAACTCAGATCGAGTAGCACCACCAATTACAAAGATAAA…	gz_contig_5370	99.86	2177	gi|223945703|gb|ACN26935.1|
aj_contig_24	GCTGTGTAAATTTCTGCATTTGATCTCCCTATCATCAGAGACAAACCATATACAGGTGCGATCTGAAATACTACTCTTTTTTCACTAGAGCTCTTCTCTGAATATGTACAACAGCGATGCAACTGCATCCTGAGTGAAAGATACATACAGAAAGGGTGAAAAGAAAAAAGGAGTTCCTCTGTTCTTCTAACCATAATTTATAAAACACATATTTCCATCCTATACATAAAGTATCTTTCTTTTCTTTGGAACTCTGCTATCTTCTTGGTGAATCAAAATTTTGTGCTTTTAGTTGAGAGATTTCGAGCCATGGGTCTGTGAGACCTCTACTTGCTCGTGTCGGGTAGAGTGCGTTGTTGATAGGACTGTAGTTGGCTGCTCCAGCTGAGTAGGCTGGGT…	gz_contig_4206	99.23	1943	gi|212275844|ref|NP_001130692.1|
aj_contig_25	GGTCGTGCGGTTCCAGAAGCGGTTCCCGTGGTCGCTTCTCAATCCTTTCCTCCACGTTGATTTGGTTTCTACAGTCCATATTGCGGACAAAGAATACTTTGATAGATTGCAAGAAGCACTTGAAGGATATGATTGTGTTCTTTATGAAATGGTGACTAGTCGTGACAATTTGAACAACCCGAATGGCCCAATGGCTGCTAAGAAGATGAAAGCTTCACGCAAAGGATTCAGTATTCTTGGCTTTATACAAAAGCAAATGGCTCGGATTCTCTCCTTGGATTATCAATTAGACTGTCTTGATTATGGCAATAAGAAATGGTTACATGCTGACCTTGACTACGAGACATTCAAGCAGCTACAGAATGAAAGAGGTGAAAGTATTCTCACATTTGCTGTGGA…	gz_contig_12375	100	1022	gi|242081369|ref|XP_002445453.1|
aj_contig_26	AGAATATTTGCAGTTCAAGATTAAGCTGAGAATACGAACTTGGAACCAATACCATTCCTTAGCACATAATACAAAATGGAAACACACAGCAGCAGCAGTATGAAATGGGATGAAACCGTACAGAGTAGGCTGAACAACCACGAACGACTTATTAACCAGCTAATCAGTAGTCTTCTCCCTCGTCGCCCTCATCGTCTGCGCCCTCCGCACCGACTTCCTCATAGTCCTTCTCAAGGGCAGCCAAGTCCTCACGGGCTTCTGAGAATTCACCTTCCTCCATACCCTCACCGACATACCAGTGAACGAATGCACGCTTGGCATACATCAAGTCAAACTTGTGGTCGATGCGCGAGAACACTTCAGCAACAGCAGTGTTGTTGCTGATCATGCACACCGCAC…	gz_contig_3399	99.72	1061	gi|6094431|sp|O22349.1|TBA3_ELEIN
aj_contig_27	TCCGAATGATGCTAGTGTTGCCCATAATGTTGCTTCTGCCACAATGCCTCCTGCCACACTCACATGTGATACGGCTAACCCTTTGCTGGTGGTGCAAAATTGTGAGCTTGATCCCAAGATTGATGTCGACAAATCTAATGGAGGTCAGACTAAAATAGTAGAGAAGGAACGTGAGGATTCTATTTTTGCAAAGAAAGAATACGAAGATTCTATCATCAGAAAGTCTCGTTTTATAGAGACAAACATTAAGAAAGCTAGTGAACGTTCTCTTAGTAATATTTCTTTGGAGAAGAAGCGAAAGAGTCACTGGGATTTTGTTCTGGAGGAGATGACTTGGATGGCAAATGACTTTGCGCAGGAGCGCCTTTGGAAATGTGTGACTGCAGCACAGATGAGCCA…	gz_contig_1575	100	2081	gi|242053371|ref|XP_002455831.1|
aj_contig_28	GAAAGGGGCTTTACCTAAAGAGGTTGTCATACCATGCAAAAGGGAGGTGTGGTGTCATGGTACGACCAAGGTGCAGATTGACAGTTGTGGTTAGAGAAGCTACAGCTGAGGAAGAGGCAAAGATTGCTAAACTCAGGGTGAGCAACTACAAGAAGCTGACCAGAAAGGAGAGGCAGCTTATGCCGCACCGGCTTATTGAGGTTAGCCCACAATGGGCACGCAAAAGGAAAGCAGAGGCTAGTGCCATGGCTTAGTGCTAGTTTCTGTATGCAGAGCCTGCTTTATCCATTGTTCGGGGCTCAGATAGCAGCTGCGCATGTTGGCTAATAGTCCATTCATCTGCTTAAGAGTTTACTGATGAACAATGGTGGTCTCAAAGCTCTCTTTTGCTGACTTTGT…	gz_contig_14546	100	347	gi|242043384|ref|XP_002459563.1|
aj_contig_29	TGAGCGATTACATATTGATGGATTAACCATAGCTAAACCAAGAGTATTCCGAAGTTCAATCTAAAGACACGACACCAGCACCAGGGATTCAAAGTCCCTAAACCCACCATAGTTCATACACAAAGTACTGATTGACCGTCACCAAAATGACCGCAGGCAGCTTTAGTCGACCTCCTCAATCTTGGGACCAGCACCGCTACCGCCGGAAGGTGCATCCTCATCCATGCCAGCAGCGCCGCCCATGCCCGCGCCACCGCCCTGGTACATCTTCGCGATGATGGGGTTGCAGATGCCCTCCAGCTCCTTTAGCTTGTCGTCAAATTCATCCACCTCTGCGAGCTGGTTGCTGTCCAGCCAGCTGATGGCGCCGTCAATCGCGTCCTCAATCTTCTTCTTGTC…	gz_contig_2193	99.71	2063	gi|242054931|ref|XP_002456611.1|
aj_contig_30	ACCGCAACTGTGCAAACACAGACGTATGTCTGCTTCCGCAACTGTTCAACATAAGTAGGAGTATTGCATATACGGTACATTCCTATTTGAAAATCTTAAGCATAACTGTGACCAGTGATGGAGGACAAAACATATAAGGCGCCAAAGACATCGTAGATAAGCTCCAGGCAGGCTTGAAGCAATGCCAACTAATGCGGGCAGTTCTTGGGGAGGTTTCGGATGACATTGCTCTTCATTCCAATCTTTGTTCTCATCGTCTCGACTCCAGACCTGTTCATTGCACGAAGAACTTTCAACCTTACCATATGCTCCTTGGACTGAACTGTCACCAAACCCATGCTCTTATAGCTGGAAGCTAGGGAAAGCGCAAGAGCACGATCCGTTGGAATAGAAGGCCGT…	gz_contig_8043	100	1214	gi|226533026|ref|NP_001151247.1|
aj_contig_31	TTCGGGGACAGGGAAAAACAAAATAAACATCAGTGACCTTCTCAGCCCTGATACAAATTCAGATGCAGAACACCAACAACAAAAAACGTCTTTTCACAAATACAGGAAAATAAAGCTTGAAACAAAATGTACAGCAAATTGAGGACAACAATCACCGTGAACAGACGATGCTATGGCCTGAAAGTAAAAGCCACCATATCAACAAGTACAGAAAGAGCAGTTTATTTTAATGGAAGACGTCCTCAATGCAAAACGGAATGGGCAACGCCTATTGCTGCACCAGCTTCCAAACACGAATGCAAGCATCCTCGCCAGCAGTCACCAGGGTATCATTGTCAACAAATGTTAAGCCATGAACCCCACCAAGATGGGCTCCCTTGATGGTGATGCGACTGGCCG…	gz_contig_14994	99.37	1433	gi|293332435|ref|NP_001168627.1|
aj_contig_32	ATTAACATGTGCAGTCTTCCTTCAATAAGTTGAAATGAACCTCGATTCCTGAAAGTAACTATGAGTAATAAGCTCAGTTCATAAGATTCAATTCTGTCTCATTGCCTCTATTTTCAACAATAATTCCCTAATGCTGGCTTCCATCCTAGTTTTCAGGCTAAAAAATTGGCGGTGTGTCCTTTCAAATACTTGGAGTTCTTCAATCTTTTGCCTGCGTTGCTCTTGTAACTCATTTATGTTGAGTTCAGCAATTCGAGTGGCATAATCTTCTTCGATTCGTGCAGTTTTTGCCATAACGATGTGTCTCAGATCATCTGCTTGGTTGCGTGCATCATTGGCATGTTCCTGGTACATATGAGCTTCAGCCTGCTTTAACCTGATCAAGCTATCCAGTCCATC…	gz_contig_4602	100	2435	gi|242041745|ref|XP_002468267.1|
aj_contig_33	GTGTCCTCGCCTCCCCGTCCCCTGCCACCGCCACCGCCGCCGCCTGCTCTTCTTCCTCCTCGTGCGGCATCAGGCCGCGCGCTTCTGTGGAGTACAACAGGTTCTTCTGCAAGGGATTTCCTTGTAGCATCCCTTCCAAAGCTGGATTCCAGAATCAAAATTACCGTACAAGGACCTTGAAAGTTAAAGCAAGAAAGGAAGCTGGTGATGGCTACACACGGCTTGCTCCTCTTCATTTTGAGACTCCAAGCGGTCAACTTCTGGTGCAAATACTGCAATCACACCCTCACTTGCTCCCTGCAACAGTTGATCAGCAACTTGAAAATCTTCAGTCAGAGAAAGATGCACAAAAGGAAGAAGCCTCAAAAATTCCGCAGGATCTCCTCTACAAGAGAATTG…	gz_contig_9566	98.94	1133	gi|242077020|ref|XP_002448446.1|
aj_contig_34	GGCGTACAGGTTCCATGCCGTCACGGTGTTCCTGGGCATATGCCTGGTGCTCTACTACAGGGTCACGCACGTCCCGGGCTCCGGCGCCGGCAGGGTGGCATGGATGGGGATGCTCGTGGCGGAGCTGTGGTACGCCTTCTACTGGATCATCACGCAGTCCGTTCGCTGGAGCCCCATCCGACGCCGCGCCTTCAAGGACAGGCTCGCCGCAAGATATGGCGACCGACTACCATGTGTGGACATTTTTGTGTGCACTGCAGACCCGAAGTCGGAGCCACCAAGCCTTGTCATCGCCACGGTTTTATCGCTCATGGCTTACAACTACCCACCCGAGAAATTAAGCGTGTACCTTTCTGACGACGGAGGCTCGATCCTCACTTTTTATGCCTTATGGGAAGC…	gz_contig_3698	99.36	2330	gi|242049580|ref|XP_002462534.1|
aj_contig_35	GTGCAATTTATTCTACCTTCTCACTCGAGCTTCAGTTAACAGAGCCTAAACTCTTTCCCGTGCTTCAATAGTTTCTATGACTTAACTCACATCAGTTAAATCATTACCAAGCAGAATACCACTAGCAACAGCTACTTTACAAAATCCTGAATTGTCATAATCATAATTTCTTAATAGTCATCATCAGTTTATCTACAGATGACACCAAACCCGTAGACTCTGCAGAGGCTCCGCTCGGATGCTATAACTACTAGTACTACAGGAGGATTGGAACGAAACCAGAGGCACTACACGGGCAAACTCAAACACGAATCTAGTGCTCTTCCCAGAAAAACTAATCAATCCATTTAACTTCTTCCTCTATAACCACTTAAACAGGATGCCTCCATGGGTAGCGAA…	gz_contig_2834	100	1484	gi|242093702|ref|XP_002437341.1|
aj_contig_36	TAAGAACCGAAAATTGTATCCCTTACAGCACCATCCATGACCAGAAGAACATGAATCGAATAGTAGCTACAGATTAGATTATTACCACATACAAAACAAAGCCTTTCCAAGTATAAGCAGTTATTTTTACATATTGGAGCTCATCTGATGGTAAGGAATCTTATCATCTGCAATGTGCTGTTCAACACTGGAGTGGGTACAAGGACAAAATAACTCAAAATAAAATTAAAATAAGGCAGCAAAGATGTCACGATTGTCGACCATGTTTGTCAATGAGGAAGTACGACTCAGGCTCAGGCACACAGCCACCCCACCATATTCACAGCGGTCAACTCATCATGCTTTCTTTTTCCTTTTCTCTTCTTCAATCTTGGCCTTAATGTAGGAGTAGATGGCAAC…	gz_contig_6105	100	869	gi|413947872|gb|AFW80521.1|
aj_contig_37	TCCATCTCCACTACCAACCGGCCACGAAATGTGCGCCTTCAGAGGAGGTCCAACTTCAGAGTGAAAGCGGCGAAGGAGCTATACTTCAACAAGGACGGCTCAGCTATGAAGAAGCTCCAGACTGGAGTCAACAAGCTTGCAGACCTTGTTGGAGTTACACTGGGACCAAAGGGAAGGAATGTTGTTTTGGAGAGCAAGTATGGGTCCCCTAAGATTGTTAATGATGGTGTTACAGTTGCAAAAGAGGTTGAACTGGAGGATCCTGTTGAAAACATTGGAGCTAAGTTGGTTAGGCAAGCTGCTGCTAAAACCAATGACCTTGCTGGAGATGGGACAACTACATCTGTCGTCCTTGCACAGGGATTGATCGCCGAGGGTGTTAAAGTTGTGGCTGCTGGT…	gz_contig_1312	100	2015	gi|224031267|gb|ACN34709.1|
aj_contig_38	ACCTACGCGTGGCGTCACGGACCAAGGACTCAAGGCTGTTGCACGCAGTAGCCCAAGCCTGTGCTCGCTTGCCCTCTGGGATGTCCCTCTTGTGACTGACGCTGGGCTCGCCGAGATTGCTGCCGGGTGCCCCTTGCTGGAGCGTCTGGATATCTCTAGCTGCCCGCTTATCACAGATAAGGGTCTCACCGCTATCGCGCAGGGGTGCCCCAACTTGGTGTCGCTGACCATCGAGGCTTGCTCTGGTGTTGGCAATGAAGGCCTCAGGGCCATTGGGCGCTGCTGTGCGAAGTTGCAGTTTGTGAACATCAAGAATTGTGTGCAAGTTGGTGACCCTGGAATCTCCAGCCTGGTGTGCTCTGCTACAGCCTCGCTTGCAAAGATCCGGCTCCAGGGATT…	gz_contig_8464	100	899	gi|242064416|ref|XP_002453497.1|
aj_contig_39	AGTCCTTTCTCGCACCTCGCCGCCTCCCCTCCGTCTCTCCCATCCTCCTGCTCCATCGAGCGAAGCGTCAGTGAAGCAGCAGAGGGCGATGGCGGGCAAGGGCGAGGGTCCGGCGATCGGCATCGACCTCGGCACCACCTACTCGTGCGTCGGCGTGTGGCAGCACGACCGCGTCGAGATCATCGCCAACGACCAGGGGAACCGCACCACCCCGTCCTACGTCGCCTTCACCGACACCGAGCGGCTCATCGGAGATGCCGCCAAGAACCAGGTCGCCATGAACCCGATCAACACAGTCTTTGATGCCAAGCGTCTCATCGGCAGGAGGTTCTCTGACTCTTCTGTCCAGAGCGATATTAAGCTCTGGCCCTTCAAGGTCATCGCTGGACCTGGTGAGAA…	gz_contig_141	100	2075	gi|219885633|gb|ACL53191.1|
aj_contig_40	CTGCCGGTGGCTAATAATATCATACTCAAATTGTTCAACACGCAAGTTCCAAAACAAGAGATCAATCATCAAACTACTGAGGTTTAAGCACGTCAAAACTTGACAGACTAGTAGAATTTTGCAACCCTTATGCTTCCAAACACTGACCCGGTACATCCACCACAACCCAATCACATAAACAGGTTTGGCCTCGATGCCTTGAATGTGGTCTTCAGCTTCCTGGTTGGTGGTCTGACCTTGCGGTATACGAGTGGGAACTTGATCTTGGAGTTGTGGAACTGCTTGGTGTTGTCCCTCTTGCACAGCTTGAAATGGACCGTGGCGGTCTTGATGATCTGGATGCAGGGGGCTCTCACGCGGTGGCGAGAAGCCATCTCAGTGTACATCTGCTCAACAGCG…	gz_contig_2115	99.55	662	gi|115465471|ref|NP_001056335.1|
aj_contig_41	ACGCTACATTTTGATACCATCTGTCTTTCCTTACCAGGAGCACAGCAACAAGAATATTAATGGGGAATTGCCTAATTAGACAATAAGGCATTGGACACAGCTTCTAATGGTCCCGCACAGGACTAAACTTGTACTGTACCATGTTATCAGAACAAACATTATTATATCGACATCACCCNNNNNNNNNNNNNNNNNNNNNNNNNNNNNNNNNNNNNNNNNNNNNNNNNNNNNNNNNNNNNNNNNNNNNNNNNNNNNNNNNNNNNNNNNNNNNNNNNNNNNNNNNNNNNNNNNNNNNNNNNNNNNNNNNNNNNNNNNNNNNNNNNNNNNNNNNNNNNNNNCCCCTCTGAGAGATTTACCATCAATTGTCCGTGCCGAAGTAACGGTCACCATACTCTCCCA…	gz_contig_12009	100	1247	gi|226492997|ref|NP_001148835.1|
aj_contig_42	CAAAAATGTATCCCATTCCCTAAATATACATATATTCTCTCGACATCACCTTGCCCGAGGGTCGTACAAACGATTAGACACTAAGTCACACAACTTTAATGTCTCACTCTTCTGATATTTGGCACACCATCAGTTGTCCGTACCGAAGTAGCGGTCACCATACTCTCCCAGTCCAGGAATGACTCTGAATTCTTCATTCAGCCCATAATCAATCTCTGACGTTACAACCTTCAGCAATGGGAATCGCTTGCAAACGCATTGAATCCCTTCAGGAGCCGAGATGAGATTGAGAAAAATTATTCGGTCCTCGGGAACTCCTTTTCTTATAAGAAGCTCAATAGCTTGATTTGCTGAATTACCTGTACCAAGCACGGGGTCCAAAAGTAGAACATGTCTTTC…	gz_contig_11997	99.78	1373	gi|226492997|ref|NP_001148835.1|
aj_contig_43	CGTTCGGCGCGTCGTTCAAGGCCGTGCCGCTCCAGTCCCCGCTGCCGCCCGTCGAGGAAATTATGTCCTTTATAAGGTCATATGTTGTGCCTGAAGGATTTCCAAACAGTGTCACTCCTTCGTATGTCCCATACATGTCATGGAGAGCAATGAAGCATTTCTTTGGTGGAGCAATGGGTGTGTTTACGACACGTACCCTGCTAAATTCCGTAGGAGTCGCTCAAAGCAGGGCTGCCTCTGGTGCTGTGGCTATCAATTGGATACTCAAGGATGGTGCTGGCCGTGTTGGAAAGATGCTTTTTGCTCGCCAAGGGAAGAAATTTGACTATGATCTAAAGCAGCTCCGCTTTTCTGGTGATCTATTGATGGAGCTGGGAGCTGGGATAGAACTAGCTACTG…	gz_contig_1579	99.82	1637	gi|242090561|ref|XP_002441113.1|
aj_contig_44	CTATAAATGAAATTGTCCAAAGCTCCCATGTTCCACAGCTAATGACTTGCACAGCTCAACTATGAAAAGATAAACAAACCTGGGATCAAAATATATGATAATCCAGGCCAAAAAAAAGAGTAAACCAGTACAAAGTTCAGTAACTCGAAGAGCAACATTATGCCATAGGTGCCTACAGCTGAAACATACTGCTCCTCCTCTTGAAACCTATTGCCTCTGCTCTACACATTTTGCTGGTCTAGAACCATTTGAAGAGGATTCCACCGTGGGTGGCGAAGAAGGGGGCAAAAACAAGGGATTCGACCGCCATGAGCTTGATGAGGATGTTGAGGGAGGGGCCAGACGTGTCCTTCAGAGGGTCTCCAATGGTGTCACCAATAACAGCTGCCTTGTGAGGGT…	gz_contig_6302	100	2333	gi|242064260|ref|XP_002453419.1|
aj_contig_45	TAAAACTACACACGTACATTTATGCAGCTAAATCCCACAACAAACATTACCAAATGCATCATAAATATGCTGGGATGTTTTCTCGTCATCACAGTATATCCTAGTACTATCTGATGCTATCTTCACCATAGCTTCTACTGGACTTGTTATCAGAATAGTATGTTCATCGTCCACGAATGAGCATACCATCCCCNNNNNNNNNNNNNNNNNNNNNNNNNNNNNNNNNNNNNNNNNNNNNNNNNNNNNNNNNNNNNNNNNNNNNNNNNNNNNNNNNNNNNNNNNNNNNNNNNNNNNNNNNNNNNNNNNNNNNNNNNNNNNNNNNNNNNNNNNNNNNNNNNNNNNNNNNNNNNNNNNNNNNATCCCCTTCTCTTGCAAGGCTGACAAGAAGCGGTCCAATTC…	gz_contig_14452	100	206	gi|414879106|tpg|DAA56237.1|
aj_contig_47	AAGGAAAAGGAAGATATGGTTAGACTATTGAAAATTAAGGAAGATACCGTAGGCTTAAATAATGACACTGCAGGCAATACACAGCGAATGTTAGATGAGAATAAAGAGAGACGGCTTAAGGAAAAGGATGATACTGTAGTTAAATTGACAAAAGAGAAGGAGGATATGGTTCGGCTGTTGAAGGAGAAGGATGATATAATTACACTGATGAAGGCGACAAAAGATATGGTTGATTTGAAAGATGCCACAGTTGGAGATACACAGCAAACATTAGATGAGAATAAGGATAGGTTACTTAAGGAGAAGGATGATATTGTAGTTCGATTGATAAAAGAGAATGAAGACATGATTAGATTGTTGAAGGAGAAAGTTACTTAAGGAGAAGGATGATATAATTAC…	gz_contig_5148	100	911	gi|49388944|dbj|BAD26164.1|
aj_contig_48	TCACCTTCCAACTCGAAAGTCTCTTTTCAATTTTTTTCTTCAATGCTTCTCCAGACTCTACAGTAGAGTTTTATATGGTGCATCGGTATGCCAAAATATCTAAAAAGATACAATCTCCTATGTCACACCCACATAGATCAATATATTGATTTTTAAACTCTTTTGCCTCGCCGTAGCAGAACATTTCACTTTTATGAAAAATGATTCTCTAGTCTTAGACCAATATGTATGCCCACTTATTATACATTTAAACTTCTGCTATCTCCCTAGCTACTCCTTACACCCATCTATGTTCCTCAAGATGAGAGGCATCCCGTTCTTTGGAGCCAACGAGAGGAGATACTTGGGCTTGTGAATATACTTCGGGGAGAGGGAGAAGGAGAACTTCCTGAGGACCAT…	gz_contig_628	100	794	gi|414866968|tpg|DAA45525.1|
aj_contig_49	GTAGAAAACAAAGTCCTCATGGAAAGTATTCAGAAACGCAGAAGGCGTAATTTACGGTTGGAGTACAAGGAAACACGTAACGAAATTCAGACAGATACATAGCAGCTCGTTACAAATATTACATCTGAACATGAAGACAGTTGAGTTTATGACAGTACTGCCACTGACGATCAAGAACATAGCCTAGCCCAGTACCTGAAGGTAAACAAGCCTCGCAACGGCAGACACACATGCGATAGTATTCGCGCACACACGAGAAAATCTAGAAAAGCACGGCACACAGGAACATATACTTATGAAAGGTTGAACACTTGCCACCACGCAGCACGTACCTCAGGCTACAGCGACAACGCTAGATCCGGGGGCCAACTAGGGTTAAAAAGTTATATGCATGTCTGG…	gz_contig_1340	100	635	gi|289578926|ref|YP_003477553.1|
aj_contig_50	GGCAGGAAGAAGCCATATCTGGTGCTATGAAACAACTGAGCCAGAAGAAAAGTCATCTTGAAGAAAATATGAGACTGGCAAATGAACTAAAAGTTGAGGAAGAAGAGCTTTACCTTTTCACTTCTTCATTGCTCAGTATGCTAGCAGAGTACAATATCCGCCCANNNNNNNNNNNNNNNNNNNNNNNNNNNNNNNNNNNNNNNNNNNNNNNNNNNNNNNNNNNNNNNNNNNNNNNNNNNNNNNNNNNNNNNNNNNNNNNNNNNNNNNNNNNNNNNNNNNNNNNNNNNNNNNNNNNNNNNNNNNNNNNNNNNNNNNNNNNNNNNNNNATGCTTCCACCATTACAATTGGTGCAAAGCGTTTGTACCAAAAGGTACATTGGAAGATCAGATCCTTAAATGA…	gz_contig_6882	100	1334	gi|357123430|ref|XP_003563413.1|
aj_contig_51	AGGGGATCCTGCTCCGCGAGTGGAGGAGGAAAAATGCTTTAGAACTGGAAGAAAAGGAACGGAAGGAGAAGGAGCTACGTGCTCAAATTATTGCTGAAGCTGAAGAGTTCAAGAAAGCTTTCTATGAGAAGAGGATACAGAATTGTGCTAATAATATGGTCAACAACAGAGAAAGGGAGAAGATTTTCATAGCCAGTCAGGAGAAATTCCATGCTAACGCAGACAAGCAGTACTGGAAATCAATTTCAGAACTCATCCCACATGAAATAGCCACCATTGAGAAGCGGGGAAAGAAAGACAAGGACAAGAAGCCATCTATCACAGTTGTTCAGGGCCCTAAACCAGGCAAACCCACCGATCTCTCACGGATGCGCCAAATTTTGGTGAAGCTGAAGCATG…	gz_contig_7846	100	410	gi|413919983|gb|AFW59915.1|
aj_contig_52	CGGCGGCGGCACGCGGGTATGCCGAGAGGCATCCAGGTTTCAACACCGTGCTTTGGCAGAGTTCTAGTATTCTCAGAAAGGATATGGAGTGCACCCCTTACACGACAAGCTCAGTATCCCACATCTCACTGCTCGAGGAAGTTGGCTGGAGATTTTGTCTTTACGGAGACTTCCTTGTCATCTCTTTTGTCAATTGCACCTGAGGGTCACCCTGCTTTCACCAGCTCCCTTGCCTGGTCTCATGCTATTGGACATTAGGGTCGGCTAGTGATTGCGGCCCTACTATAGCACATTTATTCGAGCATGGTGGGTCTTTTTCTCTGGCAACATCCCGGTAATCTTTGTCTTGGCATCACTCAGCCAGCAAAAGTTACCATCAGAGCATCTTTGGACACTTGG…	gz_contig_4380	99.88	2486	gi|242091768|ref|XP_002436374.1|
aj_contig_53	ATACACGCTGGTGCTTAGACTTTAGAGATATGGCTTCACCTGCTATCGTGATCTTGGCGGCTAACTATGGGAGCAGGACAACTGAAGGTGGCGGGTTTTTGCTATGCCCTCTTTATGGTAGGAACTCAAAAGCATTTATGGCTGCTTCAGGCAGCACAAACACCNNNNNNNNNNNNNNNNNNNNNNNNNNNNNNNNNNNNNNNNNNNNNNNNNNNNNNNNNNNNNNNNNNNNNNNNNNNNNNNNNNNNNNNNNNNNNNNNNNNNNNNNNCACCACAATTATATCACATATGACAAAAGCTGCCAAGGCAATGGTTGGATTGTCTCTAACTGTAAACAATTCACAGTCGATGACAGCCGCTGAGTTTATAGCAAAAAGAGCTATGGATGCTGTTGGAGCT…	gz_contig_2487	100	2378	gi|242034977|ref|XP_002464883.1|
aj_contig_56	GCGGTGGGTGCTGACGACCGCGGCCCTGGCCATCCATCCATCCAAGCCACCCACGAGCTCCTCGAGCATATCCGGCCCGTAAAAACGCCACCGATTCGATCACTCTACCTCCCAAGCTCGTGAGTCGAGGCTCCTCCAACCGCGGCAGGCAGGCAGAGGAGTGGAGGACGCGCCCGCCCACCATGGCCATGGCGACGGCGCTCCGCAAGCTCTCCACCAAGGCGCTCCGCGGCCAGCCGCTCTCCCGCATCACGCCGCTCTACTCCATGGCGTCGCTGCCGGCGGCGGAGGAGAGATCCGGAGTCACCTGGACGAAGCAGTTGAACGCGCCGCTGGAGGAGGTCGACCCCGAGGTTGCCGACATCATCGAGCTCGAGAAGGCCCGCCAATGGAAGGGCC…	gz_contig_3298	100	1739	gi|195622620|gb|ACG33140.1|
aj_contig_58	CGGAGATCCACCAGCTGCTGGTCTCCTCTTCTGCTGGTGATTATCAAGGGCCTTAAATGGCTGGAAACTGGCCAGAACGCTCAAAGCATGTGTCCACATCAGCACCATCTTCTGGTTTGGTTTCTAGACATCAAACCCTGTCATCAAGAAAATCAAGTCAAAGGAACATCGTTCCTCTATTAGCTCAACGAGAGGTCTCACCTCAATCAAAACACCAAGCTAAAAGGATATGGAGCAAATCTCCAAAATGCAATGCTGGTTTAATTGATTTAAGATTTGGTGATACGGATGCTAAAAATGATATCTTTTCTTGGGCGGAATCACAGTCCCTGCATCATTGGTCTGCCAAGTATTGCCCTCTGTCACCACCTCCTAGGTCAACTATTGCAGCTGCTTTCA…	gz_contig_11932	100	809	gi|115445619|ref|NP_001046589.1|
aj_contig_59	CGCTGCCTTTGCTTGATTTTAGAGTTAGGGTTCTCAAATTTGGGGATGTGACTGTAGCTAGGGCTAGGGTTCTTTAGGAAATACTTAGAGGTTGCTTCAATTGCTTCAAAATTCCTTCAATTGAAGCCATACCCGAAACCAAAAAGCCTCGATTGCTCATTGATTTTAGAGTTAGAGTTAGGGCTTTTGCTTGATAGCGAGCAATCACACATTAGAAAACCCTAGCTCTTTAATTAGGCACGAATTTGGGCTGTGATCCTTAGGGTTTTCAGTTTGACAGGAAGGTATGATGATAACTGAACATCATGAGGTTCAATCTTTGCCAAATTGGCTCGGATGTCATTGTTAGTTTTGCAGGATCAATGTGGCTAAGTGTTTGAACCACCTCAGAGGGGAGTT…	gz_contig_16449	100	620	#N/A
aj_contig_60	GGAGGCTAAGTTTTTCGACCTTTTGGTTGCCCTCAAGTGTGATATACATCATATGACTACATTTCGGCAAAACTGAAGATATATCATTAATTACTGCCATCTACTGTACAAATATAAAGCAAGAATGAACGGCCAAAACCAGCTAGCAGTGTACACAAAACACTAACAGACAAGCAGAAAAGAGAAATGGTTAAAAACTAGACAAACAAAAAAAGGCTCCCTGCCTGTCGCACTTTGAAAGAGCAACCGCAACAATATACACAGGTGGCACTACAACCCAGCGGGGAAATTGCTGATTTGCCCTTGTTCCAGTCTGTCCTCACCATTCACTTTGTAAGACATGCGGATGCGCATCGCAAGTGGTTTCTGCCCATGTTGGTTGTTAGTGACACTGAGGCT…	gz_contig_3870	100	1631	gi|413943007|gb|AFW75656.1|
aj_contig_62	ATTATATACAGTGAGAAGAAAATGATTCTCAGAACTAACATTGGAAGTAACCATAAAAGAATATTTCATTTTTTTGACTCATTACATATTCACATTCAAATGATACAGCAAAAAAGTAACACATTTACAATTGCTGAAATGGAGAGCTAAANNNNNNNNNNNNNNNNNNNNNNNNNNNNNNNNNNNNNNNNNNNNNNNNNNNNNNNNNNNNNNNNNNNNNNNNNNNNNNNNNNNNNNNNNNNNNNNNNNNNNNNNNNNNNNNNNNNNNNNNNNNNNNNNNNNNNNNNNNNNNNNNNNNNNNNNNNNNNNNNNNNNNNNNNNNNNNNNGCCAAGTTCAGTTTATCCTTTCACACGACGAGATGAGTAGTTGAGATTCATTGCCAATCTGTCAGGACAGGT…	gz_contig_4560	99.9	2942	gi|115445619|ref|NP_001046589.1|
aj_contig_63	CAGACACTTTATATATGTCTCCAAATTAAGGTAGTCACATCCGCACATACCGATAATTATACTTGGAACAAAAGCTTTTATTAGCATAAAGCAGTCGTGGTACGTGGAGGCCTACAAGAGCTTGCGAACAGTGAAGCGACCATAAAAGATGCACGGCGCCATGCAACGTTGCATAACACCAACGGATGCAGACCAACCGGCTGCACGTCGGTAGCTGATCACCAGTCCTCCTCTACGCCTTGATCTCCTCCTTGCCGGGAGGGAACTTCTTGAACTTGGGGAAGAAGAAGGGGTTCTTCTTGATGAAGGGGAGCAGCTTCTTGAACTTCTCGGGGTCCGTCTCCGGCTTCTGGGTCTTCTGGTCGGCCGGGGGGTGGTAGATCGGAGTCGGCGACGGGT…	gz_contig_556	99.55	659	gi|357145678|ref|XP_003573727.1|
aj_contig_64	CTTCTCCACTCGACGGTTCAACCATATATAGGGTTTATGCATGACAGCCCCAGTAGCTCTTCCAAACGAGCTAGACGGAATCTCCCATTCTGCACGAGTTGAACTATCCCGAGACCTTAGCTGCAACATTGAAAAGGACGTGTTGGCAATTTTGGCAAATGGCCAAGATTCAAATGCTTCCGGAACAAATCCTGGTTTCAGGGTCTCAGAGATTAGGCTTCCTAATGGTGATGTTTATTCCGGCACATTATTGGGAAACACACCGGAAGATTCAGGTCGGTATCTCTGGTCAGATGGTTGCATCTATGAGGGTGAGTGGAGGAGAGGGATGAGGCATGGGCAGGGAAAGACGGTGTGGCCATCAGGAGCCACCTACGAGGGTGAGTACTCTGGTGGATA…	gz_contig_8895	98.96	1151	gi|125541672|gb|EAY88067.1|
aj_contig_65	CATCTCCCGTCCTCCTTGCTTCGCTCCGCGTGGCGTGTGTTGCAAACCAAGCCATTCTCCTCTCCGACGAATCCGAACCCAACCGATCTCGCCGCCAGCCGGCGATGGGCGACCACGAGGCGCGCGGGGACGAGTTCGAGAAGAAGGCGGAGAAGAAGCTGACCGGATGGGGCATCTTCGGCTCCAAGCACGAGGACGCCGCCGACTTCTTCGACAAGGCCGCCAACTCCTTCAAGCTCGCCAAAAACTGGAGCAGGGCTGCAGCAGTTTACATAAAGATTGCTAACTGCCACTTGAAGGGAGATAGCAAGCATGAGGCTGCCTCAGCATATGTTGAGGCTGCAAATTGCTACAAAAAGTTCTCGCCACAGGAAGCTGCACAAGCACTAAATCAGGCTG…	gz_contig_3988	99.68	923	gi|226529563|ref|NP_001149191.1|
aj_contig_66	CTACTCCCCGCGAAACAGGAGGGACCGATCGTTGCGCCGCCTGCAGGCGATGGGCGACCACGAGGCGCGCGGGGACGAATTTGAGAAGAAGGCGGAGAAGAAGCTTACCGGATGGGGACTCTTCGGCTCCAAGTATGAGGACGCTGCTGAACTCTTCGACAAGGCTGCCAACTCCTTCAAGCTCGCCAAGAACTGGAACAGGGCTGCCGCAGTTTACATCAAAATTGCTAACTGCCACTTGAAGGGAGATAGCAAACATGAGGCTGCCTCAGCGTATGTCGAGGCTGCGAATTGCTACAAAAAGTTCTCACCACTGGAAGCTGCACAAGCACTGAATCAGGCTGTTAATCTTTTCTTGGAAATTGGTAGATTGAACATGGCAGCAAGATACAGCAAGGA…	gz_contig_2372	100	1256	gi|226529563|ref|NP_001149191.1|
aj_contig_67	CCCGTCCACAAACTCACTGCAATAAGCACTAACAGCTCAACCGCGATAGGCTACCACTCTTATTTTGCCTAAGTACAACACAATCACTCACCATACCCAGCTCACCCCGTTTGATGCATCAGCCGTACAAATATAATTACCCAGGAAAAATAGCACCATCTAGATGCATTGTTATTGTTATTTCCACAACTTGACAGAATTGTCATGGCTCGCAGAAGCCACCATCCCAGTGACTGGTGATTGTGCCAATGCGGCAATTAGACCTTCATGAGCTTGTACCGTCATGCTCTGGTTCTTCACCATGTTCCATAGCTCCAGAGACTGGTAGCCTCCAATCACCAAGAGATTGGTATAGCTCGGGTGAAAAACACAGGAATGAAATTTGCTTCCGTTCGAGCT…	gz_contig_767	100	1412	gi|242066950|ref|XP_002454764.1|
aj_contig_68	CCATTCTAGCCACCCACCACCACACCATTGCTGTCGAAGAAAGAGTTGGGTTTGGAGAATGAGGTTTGCTCCCGGAGCTCTTGCTCTGCTCCTGCTCCTCTGCGTCCATGGAGAGCAGCGAGGAGCGCAGGCCGGCGGGGNNNNNNNNNNNNNNNNNNNNNNNNNNNNNNNNNNNNNNNNNNNNNNNNNNNNNNNNNNNNNNNNNNNNNNNNNNNNNNNNNNNNNNNNNNNNNNNNNNNNNNNNNNNNNNNNNNNNNNNNNNNNNNNNNNNNNNNNNNNNNNNNNNNNNNNNNNNNNNNNNNNNNNNNNNNNNNNNNNNNNNCCCCGCGCGGAGGAGCAAGGTCACCGAGGCGCTGGCCCAGGCCGCCGGCTCCGGCCTCTCCGTGGCCAGGACGTGGG…	gz_contig_3182	99.46	554	gi|414881109|tpg|DAA58240.1|
aj_contig_69	GAAAGGGCGGGATTGAGGGCGCCAAGCCGGCGGACGCCCATGCGTTTCTGCAGCATGTCGCGACTTTTGCGGTGGCGGAGAAGGGGGACAGGGGGCTGTACAGGAGGATTGTTGTGAGCTTCTCGTGGCGCAGGCAGATGCCACGACTTGCTCTGACACTTGGCCTTGAGGATGAGATGGATGATATTATTGAGGAACTTATTACGAAGGGCCAGCAACTTGATGCTGTGAACTTTGCATATGAGGCTAATCTTCAGGAGAAGTTCCCCCCAGTTCCCCTCTTGAGATCCTATCTGGAGGACTCGCAAAAGCTATCATCTGCTTCAGAAAAACTGAGCACTAGCACTGACCAATCTGGGATTAATGTAAACAAGAAGGAGCAATCTGCACTGCGCGCTG…	gz_contig_4057	100	608	gi|357111477|ref|XP_003557539.1|
aj_contig_71	CGCGCCGCGGCGGACCCCGACAGACCCATCTGGTTCCCCGGCAGCACCCCTCCGCCGTGGCTCGATGGCAGCCTCCCCGGCGACTTCGGCTTTGATCCATGGGGTCTCGGATCGGACCCGGAGAGCTTGCGGTGGAACGTGCAGGCCGAGCTGGTGCACTGCCGGTGGGCGATGCTCGGCGCGGCCGGCATCTTCATCCCCGAGTTCCTGACCAAGATCGGCATCCTCAACACGCCCTTCTGGTACACCGCCGGCGAGCAGCAGTACTTCACCGACACCACCACACTCTTCATCATCGAGCTCATCCTCATCGGCTGGGCAGAGGGCCGCCGCTGGGCCGACATCATCAAGCCGGGAAGCGTCAACACCGACCCCATCTTCCCCAACAACAAGCTCACC…	gz_contig_8017	100	200	gi|212274977|ref|NP_001130616.1|
aj_contig_72	AATTATTCCAGGATTTCCATCCAGCCGACAGAGGCTACTTGCCCCTAGTTCCAATTGGACCAGGGAATGTCACAGTTACATACCATTATATACTACATCATAAATAAAAATAAAACAAGAGGCCAATTTAAGCCTTGTTCTATTCTTCTTTCTTGTTCCTGACCTACACGGCTACACGAACACCACCCTATTAAGGTAAATACAACCCGTCCACAAACTCACTGCAATCAGAGTACTAAACAGCTCAACCGTGATAGGTTACTATTCCTTATTTCGCCGAAGTACAACACCATAACTCACCATGCCCAGCTCACCCCGTTTTATGCATCAGCCAGAGAAATATCAATTGCCCATGAAAAAAGGAACTATCTAGATGCACTGTTGTCATCATTATTTCCA…	gz_contig_4763	100	1622	gi|242066950|ref|XP_002454764.1|
aj_contig_73	GCTGATGATGAGCAAGGTATTGATTCATCTTGGACCGTGGTAAGTACGCCAGTTTTACGAGTAAAGACGATTTATATCAGTTCGGCAATTCTTGCTGCAAAGAGTCCTTTCTTTTTCAAGCTTTTCTCAAATGGCATGAAAGAATCTGATCAGAGACATGCAACTCTTAGAATTACCGATTCAGAGGAAAATGCTCTCATGGAACTTCTGAGCTTTATGTACAGTGGAAAGTTGACAACTACTGAGCCCACGCTTCTTTTGGATATCTTGATGGCGGCCGACAAATTTGAGGTTGTTTCTTGCATGAGGCACTGCAGCAAGTTGCTCACAAGTTTGCCTATGACCACAGAATCTGCACTACTCTACCTAGATCTTCCATGCTCCATTTCAATGGCCGCT…	gz_contig_7171	99.21	1517	gi|242061226|ref|XP_002451902.1|
aj_contig_75	GATCGGAACCATGTACAACAAAGGACCAATTCATCCTGATTCATTGGCGTCTAGATTTAGCTTCCAGGTTCATTGATGTCTAGATTATTTGTGTATCTTGTTTAAATTCATCAGTTACATGTTTCGTGCATGTGTGTATCATCATCAGAACTACTTAGTACACGAATCAACGATTCAGTGGAGAGACAACATTACTTCTACTGAGTATGACATTTTTACATCGGTCACTCCAAAGTACAAGTACACGAGCAACAGGCATGCATTGCTCCACAAAACCACAGATTCAGTCAAATCCCTCCAACAAAATCATCACTCCCTTCCTCCCCATGCATGCTTGGTAGCATTCCTCCTCAGGTCACTAACTCCAAGTCCTCATTTGGGGCTGAAGGCCTGGAAGAT…	gz_contig_12490	99.13	344	gi|212274977|ref|NP_001130616.1|
aj_contig_76	CGCTGCTCCAACTGCGCCAAGTGCTGCCCCAAGGACAAGGCGATTAAGAGGTTCCAGGTGAGGAACATCGTGGAGCAGGCGGCCATAAGGGACGTGCAGGAGGCTTGCGTCCATGATGGGTACGTCCTCCCCAAGCTATACGCCAAGGTGCACCACTGCGTCTCATGCGCCATCCACGCTCATATCGTCCGCGTCCGCTCCAGGGAGAAGCGCAGGGACCGCAGCCCTCCAGAGCGCTTCAGGCGCAGAGAGGATAGGCCCTCTGGCCCCCGCCCTGGTGCTGGCCCTTCTGGTGCCGCCCCTGCTGCTGCTCCGGCACCAGCGGCTCCTCGCCCGTAGTTTTCTCTGTTTAGCCGACGGTCTATGATGGCTTGAAGCGTTTGTCTCTTGATTACGGAT…	gz_contig_1034	100	218	gi|242090859|ref|XP_002441262.1|
aj_contig_77	AGCGAAAATGAGAAGACAAATCCATTAACATGGTACTTTAAACTCCATTGGAAACATGTAGATCCTTAACAGTACGAGACATGCATGGATACCAAATACCAGACTTCACGCGGTTCATAGACCGAGCGGTGCGGGCTAAACAGAGCAAAACTATGGGCGAGGAGCGTTTGGCGCCGGAGCAGCAGCAGCTGGGGCACCAGCAGGACCAGCACCAGGGCGGGGGCCAGAGGGCCTGTCCTCCCTACGCCTAAAGCGCTCAGGCGGGCTGCGGTCCCTGCGCTTCTCCCTGGAGCGGACGCGGACGATGTGAGCGTGGATGGCGCACGAGACGCAGTGGTGCACCTTGGCGTACAGCTTGGGGAGGACGTACCCATCATGGACACAGGCCTCCTGTACGTC…	gz_contig_1022	100	185	gi|242090859|ref|XP_002441262.1|
aj_contig_78	GCTATGATGGAAGAAGGTATGGGAAATGTTCATGTTGCTCTTCGATACTTGCATGAAGCCCTGAAATGCAACAAGAGATTGCTAGGAGCTGATCACATTCAGACTGCTGCAAGCTACCATGCCATAGCCATAGCCCTTTCAATGATGGATGCATATTCTCTAAGTGTGCAACATGAACAAACCACATTGCAGATACTTCAGGAGAAACTAGGGCAAGATGACCTTCGAACTCAGGATGCTGCTGCATGGCTAGAGTATTTTGAGTCAAAAGCATTAGAACAGCAAGAGGCAGCTCGAAGAGGCATGCCAAAACCTGACTCGTCCATTGCAAGTAAAGGACACCTTAGCGTATCAGATCTTCTTGACTTCATAAGCCCAGACCAGGAAAGAAAAGAGAAG…	gz_contig_3115	99.81	1616	gi|413919720|gb|AFW59652.1|
aj_contig_79	CCCCGCCTAAACACACTCCTCTCCACTGCTGCTTACTCCAGCAGGAACACTCTCCTCCCTGACTCCACCACTTGCACTTCCTCCTCCCGCAATGTCGGCGCTCGGCACACTCTCCGCCGGCGCCGCNNNNNNNNNNNNNNNNNNNNNNNNNNNNNNNNNNNNNNNNNNNNNNNNNNNNNNNNNNNNNNNNNNNNNNNNNNNNNNNNNNNNNNNNNNNNNNNNNNNNNNNNNNNNNNNNNNNNNNNNNNNNNNNNNNNNNNNNNNNNNNNNNNNNNNNNNNNNNNNNNNNNNNNNNNNNNNNNNNNNNNNNNNNTGGCGTGGCCGGCCTCCTCAGCCTTCGCCGCCGTGGCGCGCCCACCCCAGCGCCTGCGTTGCCGCAGCTCCCAACGATCAAGTTGC…	gz_contig_6156	100	1079	gi|115435572|ref|NP_001042544.1|
aj_contig_80	ATTCTACGGCGGGCGCGATGGGTCCGGCACGACGGCGGGCTCGTGCGGGTACAAGGACACGTCGGCGGAGGGCTACGGCGTGCAGACGGTGGCGGTGAGCTCGGTGCTGTACGGCGAAGGCGCGGCCTGCGGCGGGTGCTACGAGGTGAAGTGCGTGGACTGCCCGGACGGGTGCAAGGCCGGCGCGGCGCCGCTGGTGGTGACGGCGNNNNNNNNNNNNNNNNNNNNNNNNNNNNNNNNNNNNNNNNNNNNNNNNNNNNNNNNNNNNNNNNNNNNNNNNNNNNNNNNNNNNNNNNNNNNNNNNNNNNNNNNNNNNNNNNNNNNNNNNNNNNNNNNNNNNNNNNNNNNNNNNNNNNNNNNNNNNNNNNNNNNGGTGCAATCCGCCGCGGGAGCACTTCG…	gz_contig_30339	99.15	353	gi|226491856|ref|NP_001140501.1|
aj_contig_84	AAAATTTGTAGCTGAAACAGAGTCAGCTGAAAACTAACATTTCTAGTGCACGGCCTTATTCTATTCACTTGAAACAAAAATCACGGTTCCATCCAGCTGTTCTTTTGTTCCTGTCCTAAGGTTTCCCGTTCGACTGCACCTTCGATAGCGTCTCTCTGCTTTCGTCGGCGCCTTCCACCGTCTTGCCAGGAAAGGACCTCCCACTGCTTGTGACAAGGTCCTTGATGGTTGCTTGGATGTCCTTGTCGTCCAACAGAGACTCCAATGTCACATGTACACGGAATCTCCAGTAATGCTTTGGGTTAGTGGGGTCATTGATTGTTTCCTCTGCTGCTGGTCTTGTGGTGTACTTGTCTTTCAGTGCGAG	gz_contig_13249	98.36	365	gi|242046838|ref|XP_002461165.1|
aj_contig_86	AGAACCAAATGGACAACAAACCAGATGGAAATATATGTTTGCTTCTATGTCAAAATTTGGATGGCACCAGCAAATGCACGGCTGCCTTAAATACAGTCTCTGTAGAGATAATAAATATCAAAATATGTTCAATTCTTTTACTACCATCACAGGTTTGCTTTATGGTTATTAGAGCTGTATGAGAATGTTTTGATATTTCTTCCCAAATGCCACTGCAATCACCTAGAAAGGAGATTCAAGCGACTCATCCCAAACATCTCCACTTGCATTGGAAGCATCTTCACCATCTTCTTCCATCGCTAATCTTACATACTCTCTTCGTGCAAAACGATCCCAGTCTGTTAGCGATGGCTCTTCACGCATTTGGCGGATGAGAAATGGATCTCTAGCTTCAAAGGC…	gz_contig_2749	100	1418	gi|413936021|gb|AFW70572.1|
aj_contig_87	GGCTGTACAGCCCGCGCTCACTCTCCTTGGCTGTTGATCTCCTGCTCATTCGTTACCATTGCTACCGTTCGTCCCCAGTGGAGACATGGCTAATCCGGTGTCAGCGGCTGCAAAGAAATCTCTCAATACAGTCACCGTGTTGTTCAAATTACCGTATTACACACAGTGGGGGCAGAGTCTTCTGATTGCTGGCTCGGAGCCGGCACTTGGAGCATGGAATGTCAAACAAGGATTGGCTCTGAGTCCAGTTCATCAAGACAATGAGCTAATATGGTGCGGAAGAGTTTCTGTTGCTGCTGGTTTCACCTCTGAATACAGTTACTATGTTGTGGATGATAAGAAGAATGTTTTGAGATTTGAGTCTGGAGAGAAAAGGAAACTATTCCTGCCAGAGGGCGT…	gz_contig_12416	99.48	2285	gi|242046838|ref|XP_002461165.1|
aj_contig_88	GTTTATAAGACTGAAAGGAACTTTTCATCAGAGGAGTAGAAAGCCGAGGTGCACCACCAGCACATCAAAGCTTTACACTCTGGAGAAAGTATGTGGATTGAGATTTATATGCAGAAGCACCATCAATCCAAGGAGTCAAAAGTTCCACCCTCGAATTTCTAAGAGAAAGTGTTATTTGAGAAACCCACCAGAAAGTGACAAGATCATTAATGCTAGATGGTTGGAGTTTAGGAGACTGAGAGGAACCTTTCAGAGAAATAGAAGGATGATTCACATTATCCCGCTGGCTTCTGATGACGATGGCAATGGTGTACCGGTTAATGGAGTCCCACAGGTTAGTTCAACCAGTGGCATGGACGAAATTAGGTTGAAGCTGGATAAAGCCCTCCAAACTGAAGA…	gz_contig_2171	99.43	1049	gi|242080157|ref|XP_002444847.1|
aj_contig_89	CCGAGACGGCCTGCCGGGCCGCGGCGAAAGGGAAGGAGGTGCTCAGCGGGGTCGTCTTCCAGCCCTTCGAGGAGCTCAAGGGCGAGCTCTCCCTCGTGCCGCAGAAGCCCGACCAGTCGCTCGCGCGCCACAAGTTCGTCGACGACTGCGAGGCCGCCATCAACGAGCAGATCAATGTGGAATTCAACGCCTCCTATGCCTACCACTCCCTATTTGCCTACTTCGACCGCGACAATGTTGCTCTCAAGGGATTTGCCAGGTTCTTTAAGGAATCGAGTGATGAGGAGCGGGAGCATGCTGAAAAGCTCATGAAGTACCAGAACAAGCGTGGAGGAAGAGTCAGGCTCCAGTCTATTGTGACTCCTTTATCGGAGTTTGACCACCCTGAAAAAGGCGACG…	gz_contig_2463	99.65	854	gi|413924631|gb|AFW64563.1|
aj_contig_90	CGGCTTCTGCTTAACTAAAAATAAAGTATTTCTTCGTCTTAAAGTTCTGTACCTGTCAACCACATGCCAAGCACGAGGTAAATATTACTACAAGATTGTAAAATAATAGACAAACGTGGCCTCAATGGAGCGGCACTATGATGTCGTAAGAACATCTAACAGGGCTTTAGTGTTTACAACTAACAACACAGCACTTGCCTCTGCATACAAAATAGGCAGCCGTCATATTATCAATACAACACCGTGGAGCCTATATTCCCTTCGTGCACTCAGCTCCTGCCAGCACGTATGGCCGCCCGCACAAACTCTTCACATTTCGTGTGACCACTGGAGAATACATCAGTCAGTATACCCATGACATCAAATGCCTCCTGCAAATCATTGGCTGAGGTCATATCA…	gz_contig_2244	99.81	6413	gi|242078783|ref|XP_002444160.1|
aj_contig_91	GACCAAACTCAAGGTGCTCAGAAAACCCCAAGCAAAAATCTGGCAACAAACACCAACCCGTACCTCCTCTTCATCTTCATACTCTACAGCTGTACTTATGCCGCTTTAAACAGCATCGTACATCACCGCAGGAATGGGAAATGCAGCGCTAAAATGGCAGCACTGTGTTTTTGATCACCCAGCACTCTACCGTGGAGGCTCAAGATGCAAAGCATGTTCCTTGCATGTTCAGATAAAAAACGAACACCAAAGAATAAAGTAGATGTGCATATCTTATGCTGTATTCAGGGCTTGCTGCAACTGAGCAAATGCTGCTGGATGGATCTTGCTGATGGCAGCATTGAATGCTGCATCCCCGTGGAGAGCAGCACATGCTTTCAAGTTCTCTCTTAGCACGTT…	gz_contig_10132	100	2015	gi|414591264|tpg|DAA41835.1|
aj_contig_92	ATAATAACCCGACGGAGCCTCCGTCCAGTAATAAAGCTCAAGAGCCGAACCGATGGCAGAGTTCTCATGGCTCACAGCGCTGGGATTCCTCTTCCTCACCTTCAACTCCGGTATGGCAATCTACCGGTCCAACGGTGAGCGAAGCTCGGTCCTTTTCGTCGCCGTGTCCTACCTGGACCTCGTCGCTCTGTTCGGCTGCCTCCGCTACTACGAGCGTCTGGACCGCCACGATCCGCGGCGCCAGAAGGTCAAGGCGGCCGTCTGGGCGCTCACGACGCTGCTCACGGCCATCTTCAGCTACAAAGTGGCAGAAATCATGCCCCTGGCCGTCAAGGTCGTCGTATGGGCCATGGCGGCGGCCACCACCTGTGGGGGATTTTATGCTTTTTTCATTTACGA…	gz_contig_5681	100	1046	gi|326528143|dbj|BAJ89123.1|
aj_contig_93	ATCGAGGGCGGGTTCTTCAAGCTGCAGCCCAAGGAGGGCCTCGCCATCGTGAATGGCACCTCTGTCGGCTCGGCCCTTGCGGCCATGGTGTGCTACGATGCCAATGTGCTCGCCGTCCTGTCGGAGGTCCTGTCCGCCGTGTTCTGCGAGGTCATGAACGGCAAGCCCGAGTACACTGACCACTTGACCCACAAGCTGAAGCACCACCCGGGATCCATCGAGGCCGCGGCCATCATGGAACACATCCTGGCGGGCAGCTCGTTCATGAAGCACGCCAAGGAGGTCAACGCGATGGACCCGCTGCTCAAGCCGAAGCAGGACAGGTACGCGCTCCGCACGTCGCCGCAGTGGCTCGGCCCCCAGATCGAGGTCATCCGCGCCGCAACCAAGTCCATCGAG…	gz_contig_334	100	1442	gi|414586347|tpg|DAA36918.1|
aj_contig_94	TCCTCGGTCGTCGCCTCACCCCGCGAGCAAAGAAGCCAAAGCGGCGTGCTCCACGCCGCCCTCACCTACCTACCGACCGCGCCGTCCCCGTCCACCACTGCTCCGGCCGTCGAGCACCCTCAAGTCAACCATCATGGAGGAGGGCAGCGCGAGGGCGGCGCTAGTGCAGCGGCTGATGTCGGCGAAGGCGGAGTCCGGGAAGAGCTTCTCGGACGTGGCGGCCGAGACGGGGCTCACCAACGTCTACGTGGTGCAGCTGCTACGGCGGCAGGCGCAGCTCAAGCCGGACACGGCGCCCAAGCTGAGGGCGGCGCTCCCGGCGCTCACCGACGAGCTCGTGGAACTCATGATGCAGCCGCCGTTCCGGTCCTACCACCCAGACATCATCCAAGAGCCCGC…	gz_contig_3969	100	833	gi|357146576|ref|XP_003574041.1|
aj_contig_97	GTTTTATAGGGTGCACTAGATTTGATAGAAATAGAAATGCTTGAGCAAGTTTAGTTTAGCTCAACTTGATCAGATTTGCAAGCGAAAGGCGAGATCCATACTTTTAGATGAAGATATCTCTTGACTTATCACGGGAACATGCATTGTATACATTGATGTATTGTTGTAATCAGACATGTTCTTTTGGTCAAAAAACAACACAGATACATCTATATATATCGTTTATGGACATTGCACATACAGGCCAACCAACAAACAAACTAAAACCTCTTTGGCAACATCTACAGGTTTCGTGCCCCGTTCTGCTGCCGTTTCGTGAAGAACGGTGCCATATATTAACATGGCCCTTCAACAAAGATGTGACTGACGGAAATGAAAATAGCCTCAGTGGACACCGGC…	gz_contig_10245	99.26	404	gi|187236798|gb|ACD02135.1|
aj_contig_98	TTCTCCATCTCTTTGATGATTTCCTCTGTTCTTGAAGTTATCAAAAGATCGTAGTTGTACTACTCTGTTTTTCCCACAGAAAAAGAGCGATTTTTGGTGCTGTGTTTGTACTAATCGTTTTGACTTTTCAAGAAGACGACTTCGGTAAGGAATTAACGATTAAAACGGAAGTGTCTCGCATAAAAATTCAATCTTTCGGAAGTCAAACGGCCAAGCCGCCACNNNNNNNNNNNNNNNNNNNNNNNNNNNNNNNNNNNNNNNNNNNNNNNNNNNNNNNNNNNNNNNNNNNNNNNNNNNNNNNNNNNNNNNNNNNNNNNNNNNNNNNNNNNNNNNNNNNNNNNNNNNNNNNNNNNNNNNNNNNNNNGGCACAAGTGCCAGTCTCCGAGCTCGACCTCCTCT…	gz_contig_709	99.52	1868	gi|242071757|ref|XP_002451155.1|
aj_contig_99	CGTTGCGAGTTGTTGTGCCTAATTTGGATGCTTCACAAATCAGCTGTAACACTCCAACAGCTGATATCTGTGATACTAAGAATAAAAAATTGCATCTTGCATCAGCTGATACACAACCACGGCAAGTGAAGGTTACCAGCCCGACTGCTGAAAGGTTGGAGGTGAGAAACAAAAAGTTATTAAGTATGGCAAACCGTAAGAAACTACAAGTCGTTACACCAGATTTGGAAGCACGATCACCTACTAGTGGAATATCAACACCTAGCAGCTCAACCAAGAAAAGCCAGAGTTCAGAATTTTTGTTGAACCGTAAGAAGTTGCGGGTTTCTACAGATCTTGAGTCGCCGTCAAGTGAAGGAATACGAAGTCCGTCTATGTCATGTAAAAGATCGGCAGAGA…	gz_contig_5417	99.74	2333	gi|242035003|ref|XP_002464896.1|
aj_contig_100	CCGCGCGGAGCTTCTGCATCAGTGGGTAGTTGGGGCTGCACGGGTCGTCCGCGTACGCGAACACCGCCTCGCGGTCGATCGCGGTGACCAGGTCCTTCTCGCAGAAGCGAGCGACGTGGAGGCCGCCCATGGAGTTCAGGCTCAGGGATTTCTTCGCGATCTGCATGACACAGTTCTTCACCGCGGTCTTCATGTTCTCCTCGAGGTGGCGCAGGTCGATGGCCTGGCACAGGGCGATCAGGTACGTGGAGGACATGAGCTTCAGGATGTCGATGGCTTCAGCGGTCTTCCTGGAGGAGATGAGTCCGAGAGAGTTCACGTCCTGGTTGTGCTGCTCAGCGCTCTGGACATGGTTGGTCACCGGGTTCGCCAAGAACTGGAGCTCAGAGCAGTAGGAGG…	gz_contig_1100	100	1559	gi|115447405|ref|NP_001047482.1|
aj_contig_101	TACGTCGGCGGCCTGCCCTACGAGGCCAACGAAGAAATGCTTCGCGACGCCTTCGAGTACTACGGCACCATCGTCACCGTCAAGGTGATAAATGATCATAAAGTGAAAGGAAAGTGTTATGGCTTTGTTACTTTCACCCACCCCAAAGCTGCTGAGCATGCAATTGTGGGCATGGATGGCAAGAAAATAGGCAATCGTGTTGTTAGAGTGAATGAAGTGCGTACAAGAGGTCCTCGAGATTTTGGTCGTGATGATTTTCGACGAGACCGTGATGATTTTCGACGAGACCGCGATGATTTTCGACGAGATCCTAGAAGATATGGTAGGGAACCATACTGGGACAGAAGGGATAGGGAAAGAAGCTATGAGCGTGATAGAGATCCACACCATGACAGGGAT…	gz_contig_1274	100	1217	gi|413936816|gb|AFW71367.1|
aj_contig_102	CGCCAAGGACGCGTCCGGCGTCGCCGTCGAGCTCGACGAGGACGCGCGCCCCCGCGTCAAGGCCAGCAGCGAGTGGATCCTCGACTGCATCGCGCACGGTGGCGACATCTACGGCGTCACCACGGGGTTCGGAGGGACATCGCACCGTCGCACCAAGGACGGGCCCGCGCTCCAGGTTGAGCTCCTCAGGCATCTCAACGCCGGAATCTTCGGCACGGGCAGCGACGGCCACACTCTGCCGTCGGAGACCGTGCGCGCGGCCATGCTCGTGCGCATCAACACCCTGCTCCAGGGCTACTCCGGCATCCGCTTCGAGATCCTCGAGGCCATCACCAAGCTGATCAACACCGGCGTCAGCCCCTGCCTGCCGCTCCGCGGCACCATCACCGCGTCCGGCGA…	gz_contig_271	99.19	2228	gi|242065818|ref|XP_002454198.1|
aj_contig_103	CTGCCCGGGCGATAACTCATTTTTGGGGTTCTCGCGCCGTTTGTTCTCGTATCTATCAGTAACAATGAGGTGGTTCTTGAGTAAAGTTTGTAGATTTACATCATCTGAGCACAGTGAGGCAGATGGTAAAAGATTAGCCAAGAGAGGGGAGAATGGTGGAAAGGCTGAGGAGAATAGAGTGGAGAAGGCAAAGAGGAAAGCGGAAGAGAAGAGGTTGGCCCGGCTGGAGAGGGAAATGCTGGAGGAGGAGGAAAGGAAGCAGCGTGAGGAAATGGCAAAGCTTGTGGAGGAACGCAGGAAGCTGAGGGATGAGAAAGCAGAGGCTGAGGAACGATCCAAAGGTGCTACCCCTGTTGGGGAGAAGGATGCTAGGAGGGAGGCAGATCATAAGCGACGACT…	gz_contig_4776	100	1532	gi|242084720|ref|XP_002442785.1|
aj_contig_104	CTCTCAGATAAGCCGTCCTTGCCTGATTTGGCATTACACCCACACTAACCTGTAAGATCAAATAGAAAAGGGCCAGAAGAGAACCTCTTCTTGCACTAAAATTGCTAAAAGAAAAAATACTTGGGACTTATCCTTGGTTTTTATGACTTCACAATGAACACTAAAATGGGAATTACATATACTGAACCGTACAATCTCCCAATCGCATCAAAAGATGAAACATCAATCGCCTGGTGCCTAATAGCTTCGTTAAAAATATTCAGTACTAGAAGATATCCTTGAATATAAAAATCAAATGAATGGGTGTCAATTTTATCCTTCCTTGTAGGAAACAGTCTAAGAAGGGCGTATTACAGTTCAATAACTAAACAATACTTATGCTTTACTAATTTGTTTGTA…	gz_contig_2165	99.5	602	gi|406981332|gb|EKE02823.1|
aj_contig_105	CCCCTCTCCCATTCTCTCTCCTCCCTCCCCACTTCACACACACCAACGCAAACAGCCACTCCTCACCTCCCCCACCCTCCCTCCGGTTCATGTCCTGCTGCTCCCCATGTCGCCCCCACTCGAGCTCGACTACATAGGCCTCTCGCCGCCGGCGGCAACGGNNNNNNNNNNNNNNNNNNNNNNNNNNNNNNNNNNNNNNNNNNNNNNNNNNNNNNNNNNNNNNNNNNNNNNNNNNNNNNNNNNNNNNNNNNNNNNNNNNNNNNNNNNNNNNNNNNNNNNNNNCGGCCGCCGCCGGTTCAGCCGACGACCTGAAGGGCACCGAGCTGCGCCTCGGCCTGCCGGGTTCCGAGTCGCCGGACCGCTGCGTCGCTGCCACCACCCTGGACCTGCTGCCAGCCA…	gz_contig_7731	100	845	gi|212275117|ref|NP_001130483.1|
aj_contig_106	GACTCTCAGATATAGCAACCCCAAGCCATCAAAGGATGACTGGATTGGAGTCTTCTCTCCAGCTAATTTCAATGATTCCATCTGTCCGTCAGAGAACCAATGGGTGGAGTCTCCTCTTTTATGCACAGCTCCTATTAAGTTCCAATTTGCAAACTACACGAATCTCAACTATGAAAAAACTGGAAAAGGATCCTTGAGGCTTCAGCTTATAAATCAAAGAGAGGACTGCTCATTTGCATTGTTCTCTGGTGGACTCTCAAATCCAAAGCTTATTGCTCACTCGAAAAGTATATCTTTCGTGAATCCAAAGGCTCCTGTTTACCCACGCCTAGCTCAAGGAAAATCCTGGAATGAAATGACTGTGACATGGACAAGTGGCTATGGTACCAGTGAGGCCAC…	gz_contig_11143	99.33	1346	gi|413956558|gb|AFW89207.1|
aj_contig_107	GCCGCGGAAGGTTGAGATCAGCGATTCAGGCGCCATTTGATTTGATTTGGCGCGGAAAATTGTTAGTCCCTGTTTGTTTCCATGGCCGGCTCGATCGCAGCCTCGGCCTTCTTCCCAGGATCACCAGCGCCAGCTCCTGCCGCGCCCAAGAACGGCCTCGGCGAGGGCCCNNNNNNNNNNNNNNNNNNNNNNNNNNNNNNNNNNNNNNNNNNNNNNNNNNNNNNNNNNNNNNNNNNNNNNNNNNNNNNNNNNNNNNNNNNNNNNNNNNNNNNNNNNNNNNNNNNNNNNNNNNNNNNNNNNNNNNNNNNNNNNNNNNNNNNNNNNNNNNNNNNNNNNNNNNNNNNNNNNNNNNNNNNNNNNNNNNNNNNNNNNNNNNNNNCGTTGCCGCAAAGCCGGGCT…	gz_contig_3768	99.82	1676	gi|242093472|ref|XP_002437226.1|
aj_contig_108	CCAGGGGAAAAGATGAATTGGAGTTGGACTTCAGGAGGTTCTGGGAAGAATTCCGCTCTTCCAGCTCTGAAAAGGAGAAAGAAAGGGCCTTAAATTTGGCAGTAAATTCTTTCTGTAGGCTAGTGAGGCAGCATTCTAGTGTAGCTCAGCTAGTTACAAAGTTAGTAGAAGCACATGTTTTTTCTTTTGTTATTGGAAGAGCTTTTGTTACAGATGTGGAGAAGCTAAGAATTCATAGCAAAGGAAGATCATTGCATGTTGCTGATGTTATTGGCTTCTTTTCAGATATCACAGAGCTTGGCATATGTCCTGGTTCAAACTTGTTATACGCGGTTGAAGTTCTTGTCACAGAGACAAATGATAAACAGCCTTTGTTGGACTCTGGTATTCTGTGCTGCC…	gz_contig_2303	100	4430	gi|242032997|ref|XP_002463893.1|
aj_contig_109	CGCCGGCGCCTCCTCTTTCGCTCATCCTTGCATCAGGTGTCCGGCGAAGGGAAGGTAAGACAAGATGTACACCGCTAGGAAGAAGATCCAGAAGGACAAGGGCGTCGAGCCCTCGGAGTTCGAGGACTCCGTTGCCCAGGCTTTCTTTGATCTGGAGAACGGCAACACGGAGCTTAAGAGCGACCTCAAGGACCTCTACATCAACAATGCAGTCCAGATCGACGTTGCCGGCAACAGGAAGGCTGTGGTGATCCACGTCCCATACCGCCTGCGCAAGGCATTCAAAAAGATCCACACCAGGCTCGTCAGGGAGCTGGAGAAGAAGTTCAGTGGCAAGGACGTTGTCATTATTGCCACTAGAAGGATTGTGAGACCACCCAAGAAGGGTTCAGCTGTTCA…	gz_contig_3881	100	827	gi|115452469|ref|NP_001049835.1|
aj_contig_110	GAACAACAGTCCCTGGAACAATGGCGAGGTCAAGGGCCATTGCCTTGGTGCTCCTCGTCTGCGCCTTGTCGGTCTCTTGCCATGTCGCCGTCACTGCACAGGCACCTGCGCAGCCACCGGCTGTCGACAGAGATTTCCTTTCCTGCCTCATCAAGGACATCCCTCCTAAGCTTCTCTACGCGAGGAGTTCGCCTGCGTACGGCGCCGTCTGGTCATCGACCATCAGGAACATCAAGTTCCTGTCGGACAAGATGGTGAAGCCGCTGTACATCGTCACCCCCACC	gz_contig_28267	100	281	gi|427930809|pdb|4DNS|A
aj_contig_111	CAGATCGCCAAGCGCCAGGCCGTTGTCAACCCGGAGAACACCTTCTTCTCCGTCAAGCGCTTTATCGGCCGCAAAATGAACGAGGTCGACGAGGAATCCAAGCAGGTCTCGTACCGCGTCATAAGAGACGACAACGGCAACGTCAAGCTCGACTGCCCCGCGATTGGCAAGCAGTTCGCCGCAGAGGAGATCTCCGCACAGGTGCTGCGGAAGCTAGTGGATGATGCATCAAAGTTCTTGAATGACAAGGTCACAAAGGCTGTGATCACTGTCCCTGCATATTTCAATGACTCGCAGAGGACAGCAACAAAAGATGCTGGCCGCATTGCTGGGTTGGAGGTTCTGCGTATTATAAATGAGCCTACTGCCGCATCATTGGCATACGGTTTCGAGAAAAAG…	gz_contig_719	99.2	1502	gi|413933381|gb|AFW67932.1|
aj_contig_112	AAAAAAATCAATGGCTGTCATACACAAGCATGTAGAAACATATGATTCTACCTACAGTTTTTATGTACATGTACATGCGATGTTGCCTGGTGGTACTCATGAACACGGAAAGGGTTAGCCTATTGTACATTGAACTCTTTGTACAACATCCAGACAAGGCTGATGATGGTCCAAGTGACTTCTTATTTGAAACCTGCACAAATTTTATCCAGAAGTCATGGCACGGTCAAAGAAAAACCCTAGCTGATTTCTTCCTGCCCTCTGCCATAAAAAAAAATTTGGCGACACATCATCTTGTACCGCTCAAATGTAACAATGACACTAATTCTACCACCATAAGCCAGCCTCGACGGGGATCACATAATTTACAGCATTTAGGAAGAGAATGCTTAGGAACGG…	gz_contig_2407	99.84	1922	gi|242046866|ref|XP_002461179.1|
aj_contig_113	CCGCGTCCGGTTGCCCTGGGAGTATTTTGTTTGCCATGGAAATGTCTGCCTCTGAGGTCCAGGCTAATGAAGCCAGCAAGGACGCCAATGTCAAGAAAATCAGTCAATCAGGACTAAAAATTCGTATACGCCTACCACCAAGAAAGAGGTTGTCTGATGGCACTCAGATCAGGAGTCAAGGAGTTGCTGAGGATAGTGAAAACCTCATAGTGAAGAACTTGCGGGAAAAGACTGATAACAACACCCGAAGCACGACCTGTACAACTGCTGAAGTGATGGCTGAGAAGGCCTGCAGCAATCCACCAGGAGTAATTGAAGACATTAAAAGCCTCCCAGTCCTCCCCGCTATGGAAGTACCTAAACAGGCTGATAACAACACCAGAAGCACGTCCTCTATGG…	gz_contig_15929	99.22	1148	gi|242043532|ref|XP_002459637.1|
aj_contig_116	AGAAAGCTGAGGAGGCCTTTTCACTTGATTGCTTCTCGTGCAGGAGTATCTTTTTTTTCTCCCATCGTTCGTTCCCTGGAAAGTTCTGTTCTGTGGGGAAGCTTGACGAGCAGCCCTGTCTGGGGTTCTGAATTCGAGTCCAGTCGTAGTGAGCGTTGGTGCTTGCTGATCCGATGGGGGAGACGAACCAGNNNNNNNNNNNNNNNNNNNNNNNNNNNNNNNNNNNNNNNNNNNNNNNNNNNNNNNNNNNNNNNNNNNNNNNNNNNNNNNNNNNNNNNNNNNNNNNNNNNNNNNNNNNNNNNNNNNNNNNNNNNNNNNNNNNNNNNNNNNNNNNNNNNNNNNNNNNNNNNNNNNNNNCGGCGCCGGCGCCGTGCACATGCCTCACGAGCAGTTCCATCA…	gz_contig_11560	100	1823	gi|357159362|ref|XP_003578422.1|
aj_contig_117	TGGGCAACCTCGCCCCCAAGCTGCTGCAGCTGCTCCAAGATGAGTACAAGCTACAGAAGGGCGTCAAGCTGCAGGTGGAGTCTCTCTCGCAAGAGCTCAAGAGCATGCATGTCGCCCTCTGCAAGGTGGCTCAGGTACCGCACGACTGCCTCGACCCGCAGGTCAAGCTCTGGGCCAGCGAAGTCCGGGAAGCATCGTATGACATGGAGGATGTAGTAGACACTTTCTTCGTGCGTGTTGATGGCGGCTCTCGGCCGGCCGACATTGATGCGGGCAAAGTCAAACGCCTCGTGGAGAAGATGGGCAAGATGTTCAGCTTAAGCAAGCTCAAGGCTCGCCGCGATATAGCAGGCGCCATCGAGGACATCAAGCAGCAAGTGGACAAAATGGCCAAGCGGC…	gz_contig_7152	100	1595	gi|242069499|ref|XP_002450026.1|
aj_contig_118	CACCTCCGCGGTGCAGAGCATCCTCGTCCACAAGACGGACGAGGACAAGGTCATGGTCCTCGACTCGCACAAGCTGATGGGTGCCTCCGGCGAGCCTGGCGACCGGGTGCAGTTCACGGAGTACATACAGAAGAATCTGCACCTGTACCAGTTCCGCAACACCATCCCGCTCTCCACAGCTGCCACTGCCAACTTCACCCGCGGCGAGCTCGCCAACGCCCTCCGCAGGAATCCTTATATGGTCAATGTTATTCTTGCTGGATATGATAAAGATGTTGGTGCCTCCATGTATTACATTGACTACATTGCAACGTTGCACAAGATTGACAAAGGTGCTTTTGGTTACGGGTCTTACTTCTGTTTATCGTTGATGGACAAGTTGTATCACCCGGACATGAC…	gz_contig_12935	100	743	gi|162458463|ref|NP_001105922.1|
aj_contig_119	GTCGATCTGGAGAACATCCCCATAGAGGAGGTGTTCGAGCAGCTGAAATGCACCCGCGAGGGGTTGTCCTCCGACGAGGGGGCTCAGCGTCTCCAAGTCTTTGGCCCCAACAAACTCGAGGAGAAGAAGGAGAACAAAATTCTGAAGTTCTTGGGCTTCATGTGGAACCCGCTCTCGTGGGTCATGGAGATGGCCGCCATCATGGCTATTGCGCTCGCCAACGGTGGCGGCAAGCCTCCGGACTGGCAGGACTTCATTGGTATCATCGTGCTTCTAGTTATCAACTCCACCATTTCATTCATTGAGGAGAACAACGCAGGCAACGCCGCTGCTGCTCTCATGGCCAACCTTGCCCCCAAAACCAAGGTGCTGAGGGATGGCCGTTGGGGTGAGCAAGAG…	gz_contig_1138	100	1664	gi|346230721|gb|AEO22063.1|
aj_contig_120	GTTATAGTGATCTGCCCTACCATTTGAAAACATGCTTATTATATCTAAGCATGTATCCAGAAGACTCTGAGATTGATATGCATCAGGTTGTAAGAAGGTGGATGGCAGAAGGCTTCATCAACGTCAAAAGTGGGAGGAGTTATGCTGAAGAAGGGGAATGCTATTTTAATGAACTTATAAACAGAAGCTTGATCCAGCCAGCACGTGAAATTGATAGAGATCAGCTGATATGGAAGTGGATATCTGAAGGTTTCATCCAACCCAAGAAAAATGGTGATAACTTATTTGAGCTGGGAGAAAGTTACTTCAATGCTCTGATAAATAGAAGCCTTCTACAGCCAGTCGGCAGTATAGATTCTGTACAGGGGATTTATGCATGCCGTGTGCATGATATGATTC…	gz_contig_1189	100	764	gi|222616278|gb|EEE52410.1|
aj_contig_121	CACTTCTCTTAGGGTTCATGCAGTTGTTAGTTGCAAAATACCAGGTCGAGACCAGTAGATTTGCCCTACTCTTATAGCAGTGACATAAAGTACTTTTACATTGTCTCGAGGAAATATTACTGGCTTATTGACCGTACAGACATATATAGTACATGCTGTTCAGCCTCTTTCATATAGAGGTGGACTCTGCATCAAGACACTAGCCGAGATGTGGCATCAGCTGGCATGCTGCAATCTCCCATTCAGAACGAACATCGAGTGAACAGTGTTCACTTGATAAGAATGCACCTCACTGGCGAACCCTCAGCTCCGATCAATCTGAGAGGTAAGCAATGTAACATGTATATACCGGCCTCAACACCGTCTAGTTTCAGACCTTCGACTGGGATTATGTCCGGG…	gz_contig_5035	99.62	797	gi|413935954|gb|AFW70505.1|
aj_contig_122	CATGGCGGGGGACGGGGAGGAGGTGTACGTGGCGGCCATCGACCAGGGCACCACCAGCACCAGGTTCATCATCTACGACCGCCACGCCAAGCCCGTCGCCTCGCAACAGCTCGAGTTCAAGCAGCTCTACCCGGAGGCAGGCTGGGTTGAGCATGATCCTATGGAGATTATAGATACAGTGAAGGTATGTATGGCGAAGGCAGTTAACAAAGCCACTGCTGATGGGCATAATGTTGATGCTGGTCTGAAGGCCATTGGAATCACAAATCAGAGAGAAACCACTGTTATGTGGAGTAAATCGACTGGTCTTCCACTGTACAATGCTATTGTGTGGATGGATGTTCGCACAAGTTCCATTTGCAGGAGATTGGAAAGTGAACTGTCAGGTGGTAGAACTCA…	gz_contig_4364	100	1835	gi|357166356|ref|XP_003580683.1|
aj_contig_123	CCGTCGTTATTGTTACTGATACCCTGTGTCTGCTCTCTAGTAGCCGCACTATTGAAAGTCACTCCTGATTCATGACTACTATTAACATTAGGTGTTCCTGGCAGTTGTTGCTGCCCAAAAGTGCGGTGGTTATTATCCCTAATTTCCTGCATCAGCTGGTTAAGCAAATGCTGGTGGTAATGTGGGCTCGCGCCCAAACCCTGGATACTGTTGTGCTGTGGCATTGATTTCTGGAATGACGGGGAGTGCTGGAACTGCACCAGCTGCACTTGGTTAGGTACACTGAAGGATCTGGATAATTCCATCTGCATGCCACTGTGCATTGATCCAGGACCTCTGAAGACCCTTGATGCCTCCTGCTGGAGACAACTTTGATTTGCACCAGAGCTTCTGAACATA…	gz_contig_1770	100	1571	gi|222634876|gb|EEE65008.1|
aj_contig_124	CGGCGGCCGTGTCCTGGTCGACCTTGGCTTCATGGTCTTCAACCCGGCGGCAAGCCCAAACATGACGAAATGGTTTCAAGAGCTAGGGGTGGAGATGAGCACATCAGAAATGTCATTCTCAGTAAGCATGCAGTTAAACAAAGATAAATTCTTTGAGTGGGGCAGCCGCAATGGTATGTCTAGTGTTCTAGCACAGAAGAGCAATTTGCTTAGCCCCAGATTCTGGCTCGTGATCCATGAGATATTGAAGTTCAAGAATCATGCCCTCAAGTACCTGGACGACCAGGAAAGAAACCCTGACCGGAGTGAGACTCTGGGGCAATTCATTAAGGCAAATGGATATTCGCAGCTGTTCCAGAATGCCTATCTTATCCCAATGTGTGCATGTGTTTGGTCCTG…	gz_contig_666	99.76	2510	gi|242072009|ref|XP_002451281.1|
aj_contig_125	CGTCTCATTTCACATGTCATTTTCCTGTAATAAGCAGAAGAACAATTTATCGATTACAATAAGCACCTATTTTCACAGTTGATACAGTAATATTGTTTTTACAGTGGGCGAAGGAATTTTGGTCTGAGTTGCATCCCTCCTTTACATACCAGAAACTCAACATAGTTGAGTCAACAATGGTTGTATAGACAAATTGTGAAACCAATCTCATGATCGCTTCAAATGAAACTTGTATGTAGGAACCGCCATGATGTTGAAGTTCACTTCACTCCCCAATATGATTGAGCAATTCAGGCTGTGGAAGGAGCACTTTTCTTGTGGAACATCTTGTAGGCATCACTATACACAGCTACCACATTTGATACAACTGCAAGAACAATCATGAAGACAGCCAGAAAC…	gz_contig_17152	99.28	1250	gi|357124534|ref|XP_003563954.1|
aj_contig_126	GCAATCAGAGCAAAGGTTACGATGTTCAATGCTCAAAACTTTTGACATTGTACACGTCCACTCCAGTACAGAATACCTTAGCAACAATATTGGCATCCGACTATTTTCCAACATAGCATGAAAACTAGTACACAAACATTATGAAAGAAGAAATGGGTAAAATATCGAAAGCATCATCTTCATGCGTTTTCAGACACAGGGTACTCAAAGACCACGTCTTTACCACAGAGCCTGCGGTAGACTGCAGTGAAGGTTTCTAGCTTGTATTCTGTGTTGTTCCTCTCTTTTGGGTCCAAGAAGATCTTGATGATCTTGGAACCATCCAAACGGTGTCTGACACGCTTGCCCACAATCTCAGCTGGGTAGACAACATCCTCCAAGATTCCATCATGAACAGCA…	gz_contig_3775	100	788	gi|212723074|ref|NP_001131888.1|
aj_contig_127	CCGCTCACCTCAACGCCCTCACCCCAAATATTGGATATAGGCTTAATAAATTTTATGAGTCATGGGAGGACAACCCAGACATTGGCTTCGTCATGATGAAGGGCAGCGGCCGAGCATTCTGTGCTGGTGGGGATGTTGTTAGTTTGCGCAAACTTATCACTGAAGGCAAGTTTGAGGAGAGTAAGGATTTTTTCAAGACCTTGTACAATTTCATTTATGTTCTAGGAACGTACATGAAACCACATGTCGCCATTCTCGATGGCATTACCATGGGTGGTGGAGGAGGGGNNNNNNNNNNNNNNNNNNNNNNNNNNNNNNNNNNNNNNNNNNNNNNNNNNNNNNNNNNNNNNNNNNNNNNNNNNNNNNNNNNNNNNNNNNNNNNNNNNNNNNNNNNNNNNN…	gz_contig_9726	100	992	gi|242035143|ref|XP_002464966.1|
aj_contig_128	CGACGGAGGCGGTGGTCGCAGACGAGAAGGTGGCGTCGCATGTGGACCCGTTCCTCGTCGAAGCGCTCGACAACCCTCGACACCGCCTCGTGGTTTTGCGGATGGAACTGGATATACAGAAATTTATGCAGAACCCTCAGCTGCAAGAATTTGAATTCCAGAACTTTCCAACTTCTTACCTGCGCTGTGCTGCTCATCGTGTTGCACAACATTATGGTTTGGAGACTGCAGTAGTAGATAGCTTAGTTGATGGTTCAGTTAGCAGGATAGTTGCAAGAAAAACTCCAGAAAGCAGGTACCCAGCAATTGCTTTATCAGAAGTTCCCAGCAAACAGACAAGAAATGATTATGAGTCTGCAGAGAAGCTCAAGTTTGTCATCTATCAAAGGCCCAAGGCAT…	gz_contig_711	100	1112	gi|194702280|gb|ACF85224.1|
aj_contig_129	AAAGACACCAGCAAGAATAGCTTTGATACATAAAACGGTCACATAACGAGGTCTGAATCCAGCAAGCATATATATGCTGAAAATAACTTTATGCAGATTACCACTTAAACCTTTCTAGACTGAAGGACCGTACTTACAAACTATGACAAAGGTGCAAAACACATGCTGTCTCACGCAAAGTAGCACATGCAACCGATATTAACATTGGTCCATATTTCGCAGAAACATAACGCACCGCACCACAAAACCAAAGATAGCTAAGCAGCAGCACTTAGTCGAACAGGCTGAAACCCATGTCATCATCAGATTCTTCCTTCTCTTCAACCTTCTCTTCCTTCTTAACCTCTTCAGCAGGTGCTGCACCACCACCAGCAGCAGCAGCTGGACCTGCCATCGCCA…	gz_contig_1320	98.06	308	gi|222631764|gb|EEE63896.1|
aj_contig_130	CTCTATTCCTAGCCGGTTAAAATTTAAAACTAAACAAGAGCTTTGATCATGAAACCGGTCATATTACGTGGTCCGAATACAGCAAGCATATACATGCTGAGAATGCCTTTATGCAGACTACCACTTCAACCTTTCTAGACTCCTGAAGAATCGTACTCACAAACCATGACATCAGTACTAAACATATGCTGTCTCAACTCTCAAAGAAAAATAGCACAAGCATCGGATATTAACATTGCTCCATATTTTGCGAATGTCAACGTATCACACCATATCACATCGAAAGATAGCCGGGTAGCACCGCTTAGTCGAACAGGCTGAAACCCATGTCATCATCAGATTCTTCCTTCTCTTCAACCTTCTCTTCCTTCTTTGCCTCTTCAGCAGGAGCTGCGCCAC…	gz_contig_1330	100	341	gi|357129092|ref|XP_003566201.1|
aj_contig_131	CGAACACGCAGGAGCCGCTGTCGAACTCCGACTCGGGCCACGACTCCGCCACCGAGAGCGCCAGTTCCCAGGGGACGTGGCCCGGGGAGCCCGCCAAGAACATCGGCGCTGGCCCTGTCATAGCCGCTGCGCCGATAACAGCGGTGAGGATGGTGGAGAAGGAGAAGGAGGTGGTCGGCAATGGCGTGTCCGAGTTGCAGGTTGCGCGTGGTAGGATCCCGAGTGCGGGGAGGGTGACGNNNNNNNNNNNNNNNNNNNNNNNNNNNNNNNNNNNNNNNNNNNNNNNNNNNNNNNNNNNNNNNNNNNNNNNNNNNNNNNNNNNNNNNNNNNNNNNNNNNNNNNNNNNNNNNNNNNNNNNNNNNNNNNNNNNNNNNNNNNNNNNNNNNNNNNCGGGGAGGG…	gz_contig_3360	100	1040	gi|242071799|ref|XP_002451176.1|
aj_contig_132	AAGGCCACTCTGCCACTTACAATGCCCCGTCGCGTATTTAAGTCGTCTGCAAATGATTCAGCCTGCCGCCCGTTGGGAAGGAAGCTTCGAGGCAGCCAACCACAGCGCGTCGGCCGGGAAGGCTTTGCCAATGGCACGGGCCCTTGGGGTGCGAGCACCCTAACATGGATCGGGTCGAGCGGCAAGCAAAGGCGCCGCTTGCTAGCTTGGATTCTGACTTAGAGGCGTTCAGTCATAATCCAGCACACGGTAGCTTCGCGCCACTGGCTTTTCAACCAAGCGCGATGACCAATTGTGTGAATCAACGGTTCCTCTCGTACTAGGTTGAATTACTATTGCGGCACAGTCATCAGTAGGGTAAAACTAACCTGTCTCACGACGGTCTAAACCCAGCTCACG…	gz_contig_155	100	4046	gi|357488213|ref|XP_003614394.1|
aj_contig_135	CTGCCGCGCGTGCTCACTGGCCGCCTCGCGCAGCGCCCAGATTGTGGATGTCTTGCCAAGCAGTCAGTCTTGATGAGCACGCCCGCAAGCTTCACAAGACTGCAGGTTGGAACAGTAGACTTAGTTAGCAGGCCTCTGGTTCTTCGACACAGCGGAAAGAGAGCAGTTTTGATGCATGCCACTATTGAAGAAATCGAAGCAGAAAAATCTTTAATTGAAGACCAAGCTAAAGAGAAGATGGACAAGGCAATTGAAACGATCCAAAGTAACTTCAACACTGTGAGGACAGGGCGCGCAAACCCAGCCATGCTTGATAGGATTGAGGTTGAATATTATGGAACTCCAGTGAACTTGAAGAGTATTGCACAAATAAGCACTCCAGATGCAACTTCTCTTCTT…	gz_contig_12367	99.65	854	gi|242080283|ref|XP_002444910.1|
aj_contig_136	TACAAGATTGTTGTCCTTGACAAGATCGATTACTGCTCCAACCTCAAAAACCTCAACCCTTCGAGGCCTTCCCCGAATTTCAAATTTGTGAAGGGTGACATTGCAAGTGCTGATCTGGTGAACTACCTTCTCATCACCGAATCCATTGACACCATCATGCACTTTGCTGCCCAGACTCATGTGGATAATTCATTTGGTAATTCCTTTGAGTTCACAAAGAACAACATATATGGTACTCATGTCCTTCTTGAGGCTTGCAAGGTTACTGGTCAGATCGGTAGGTTTATACATGTTAGTACCGATGAAGTGTATGGAGAAACTGATGAGGATGCTGTGGTTGGTAACCATGAGGCCTCACAGCTGCTTCCAACAAATCCATATTCAGCTACAAAAGCAGGA…	gz_contig_9872	100	2120	gi|115452247|ref|NP_001049724.1|
aj_contig_137	CGGATCCATTTAACCCTTTTGGGGCTTTACCGTCGCCGCTGTCTTGAGATGCCTTCCTTGTACCACCTTCCAACAAAATGAAAATTCAATATCACACTTTTATTATGGTGTTCCGGTGGCGACGATAAATGGTAGTGGCAATCTTCAGAGTATTGGTATCGTCGTCGACACTGGAACTCCATAATAAAAGTATAATTTTGATATCGAGGAGAAATTGCTCATTCGAAGAGCACAAGCTGCGCTATAGGTAGCAAATCTACTTTCTCTATCAGAGCTATGTTGG	gz_contig_15282	100	281	#N/A
aj_contig_138	TTCAGCGAGCAGGCATATGATTGATTTGGGTGTGAACAAAATTCCCGCAATCACTCTTCCTACATTAGTTACTTCTCATCCCTTTGGATAAGAGCACCTAGGCATGACAAGGTCTCTTCAGAGAGGAGAAAAGACCTCCATATGAGCCAAAGAAACTAAGGCATAACAATNNNNNNNNNNNNNNNNNNNNNNNNNNNNNNNNNNNNNNNNNNNNNNNNNNNNNNNNNNNNNNNNNNNNNNNNNNNNNNNNNNNNNNNNNNNNNNNNNNNNNNNNNNNNNNNNNNNNNNNNNNNNNNNNNNNNNNNNNNNNNNNNNACAATACTAAAAAAGCCTTGGAGGAGGGCATTGGATGTGCCGACTCTCATCCAGGAAATAAAACAAGTGAAAAAGTGTCTATAT…	gz_contig_2454	100	1184	gi|413925558|gb|AFW65490.1|
aj_contig_140	AAGATCCAGAAGGACAAGGGCGTCGAGCCCTCGGAGTTCGAGGACTCCGTCGCCCAGGCTTTCTTCGATCTGGAGAACGGCAACACGGAGCTCAAGAGCGACCTTAAGGACCTCTACATCAACAATGCAGTCCAGATTGATGTTGCGGGGAACAGGAAGGCTGTGGTGATCCACGTCCCCTACCGCCTGCGCAAGGCCTTCAAGAAGATTCACACCAGGCTCGTTAGGGAGCTGGAGAAGAAGTTCAGTGGCAAGGATGTTGTGATTATTGCCACCAGAAGGATCGTCAGGCCACCCAAGAAGGGTTCAGCTGTTCAGCGTCCTCGCACAAGGACTCTGACTGCTGTTCATGATGGTATCTTGGAGGACGTCGTGTACCCAGCTGAGATTGTGGGGAAG…	gz_contig_3808	100	401	gi|115452469|ref|NP_001049835.1|
aj_contig_141	CTCGCGCGGAGTTCCTTCTTGTTTGGCAAGCCAAAAAGCTCTCATCAGGGACACCAAGGTTTCGTTGCCGATGGCGACCTCGTGGACTCTTCCGGACCATCCCAAGCTTCCCAAGGGGAAGCAGGTGGCCGTCGTCGTGCTCGACGGGTGGGGCGAGGCCAACCCTGACAAGTACAACTGCATCCATGTCGCCCAGACGCCCGTCATGGACTCGCTCAAGAATGGTGCTCCAGAGAAATGGAGGCTGGTGAAGGCTCATGGAACAGCTGTGGGTCTCCCATCTGATGATGACATGGGCAACAGTGAAGTTGGCCACAATGCTCTTGGAGCTGGTCGCATTTTTGCTCAAGGTGCTAAGCTTGTGGATAGTGCTCTTGCCTCTGGGAAAATATACGATGG…	gz_contig_6376	100	2012	gi|115440691|ref|NP_001044625.1|
aj_contig_143	GGAGACCTCGCCCATCCCGCATTGCCCGCCCACGATCCGCTCCGGGAGATATGGCGTCGGGAGCCAAGGACGTCGGCATCCTCGCCATGGACATCTACTTCCCGCCCACCTGCGCGCTCCAGGAAGAACTGGAAACTCATGATGGTGTGAGCAAAGGGAAGTACACCATCGGTCTTGGTCAGGATAGCATGGCATTTTGCACCGAAGTTGAGGATGTTATTTCAATGAGCTTGACAGTGGTGAAGTCCCTCCTTAAAAATTACAACATTGACCCTATGCGCATTGGACGTTTGGAAGTTGGCAGTGAAACAGTAATAGACAAGAGCAAGTCCATAAAGACATGGCTGATGCAGATATTTGAGGAATGTGGAAATACTGATATCGAAGGAGTTGACTCCT…	gz_contig_5965	99.58	1442	gi|242042467|ref|XP_002468628.1|
aj_contig_144	CGCCCTCAAGGGCTCCCCCATCGACGCCCTCATCCGATCGTGCCTCCTCGAGGAGCGATCCGCCGACGCCAGCTTCTCGCAGGACAACTACGCCCTCAAGTGGACCTTCCACAACGACCTCGGCCTCGTCTTCGTCGCCGTCTACCAGCGCATGTTACACCTCCTCTACGTCGACGATCTGCTGGCCGCCGTCCGCAACGAATTCTCCCAGATCTACCATCCTAGGCGCACCAACTACGATGACTTCAATGACATATTCCGTCAGCTCCACCTCGAGGCCGAAGCCCGTGCCGAGGATATGAAAAAGACCAAGCAGCCCATCGCGTCCCGGCCCTCGCAGACTCTCTCCCAGAACAAGACTACTGCTCCTAAGGCCCGTGGTGGCGATTCTCGCGGCAC…	gz_contig_171	99.84	1877	gi|242037271|ref|XP_002466030.1|
aj_contig_145	CTCGATGTGTAAAGTCAACGATGTCAATACTTTTGGAATTGTTGGAATTGGAGGGAGTATACTAGATAGCCAAACTATTCATCTCTAATATATACGCCTATCTTTACGAAGAGCAGACTGCTCCCACACTCTAGGCAGATTTCGCGAAGCCAATCCTGTCTTTACCAAAGTCGAACACCGTGTGGTAAGCTCCCATGAATACATCCCCAAGAATCCAAAGAGGACCCCGCGGAGGTGGTATGTCGAATGCCATGAACCCACTTATGCAGACAGTTTGGCCACCTTGCTCCAGCTTCACAATGTACTGCTCCGGTGTCAGAATAAAGGTCTTGCCCGCAATGGTGAATGCGAGATTTGGCATCTTTGAGATTAGATGACAGCTAACTGTTGATTCCCCAT…	gz_contig_192	99.79	1427	gi|115461973|ref|NP_001054586.1|
aj_contig_146	GGATGACAACGTCGCCAGCCAATCCAAAGTAGGGAACAAATCAAGCTCATCATCCAACCCTACATCAACAACCAAAAGCGGTTCCACTTGGTCATCGTTGACTCTGCCATCATACAAAGAAAGGAGTGAGCTTCCTACTCCTAGGACAGAAGGAGAAATCTTGGCGTCACCAAATTTAAAGGCATTCTCACTCAGTGACCTCAAGTCTGCAACAAAGAATTTCCGACAAGACAGTCTTATTGGGGAAGGAGGATTTGGCTATGTTTACAAAGGCTGGATTGATGAGCAAACTCTTGCTCCTTCAAAAACAGGATGTGGTATGGTTGTTGCCATTAAGAAGCTAAAACCAGAAGGTTTCCAGGGCCACAAGGAATGGCTGACAGAGGTTGACTATCTTGG…	gz_contig_11822	100	764	gi|115481928|ref|NP_001064557.1|
aj_contig_147	CAATTCTTAGAAGAAAAGGCCCTAACAGCAGAGTGCCATTACTATCAAGCAAATCCCCTCACGTTAAATAAGTCATTGGAGTCGGACTAAGAGGTGGCAAGCAAAAGCATGTCCGTAACTTCAGACCATGAAATATCTCACAGGTCAAATCAAGCTTGATGCTAATAGCCACGGCCCACGGCATACAGCTAAGCCGTTTGAAGTTCTGGAACATTGTGTTTACAATTAACATTACCTCTGCTGAATTTTGATCAGGCTCGAGGTAACAATGTTTTGGTGTTGGAGATTAGCATTAGTAACATAAGTCACCTCCTGATTGCAACATAAGTTCCTAGTTATCTATTGTCCGTGATTGCTACTGTGTTGCAATCCTCCTGATTGAATAACGCTAGTGCTGTC…	gz_contig_124	100	1610	gi|242096446|ref|XP_002438713.1|
aj_contig_148	CCATTCCTTGTGGCCCTGGAAACCTTCTGGTTTTAGCATCTTGATGGCAACAACCATACCATATTTTGGCTTCGAAGAAGCACGAGTTTGCTCATCAATCCAGCCCTTGTAAACATAGCCGAATCCTCCTTCTCCAATAAGGCTGTCTCGGCGGAAATTCTTAGTTGCAGCCTTGAGATCACTGAGTGAGAATGCCTTCAAATTTGGTGATGCCAAGATTTCTCCTTCTGTCCTAGGTGTAGGAAGCTCACTCCTTTCTTTATATGATGGCAGAGTCAATGATGACCGAGTGGAACCACTTTTGGTTGTTGATGTGGGGTTGGATGATGAGCTTGATTTGCTTGCTACTTTGGATTGGTAGGCGACGTTGTGATCCACTTGCGCCG	gz_contig_20722	100	377	gi|115481928|ref|NP_001064557.1|
aj_contig_149	ACCCGAGTATCCACGATTCTACTCTCAACATTTTAAGAGCAGGAGACTTAGTTCATTTTGTATAAAGATTATATGTTCTTGTGACTTGCGAGGACTGTTCTAGAGAGCAGTCTAAGTTGCAGCTACATACCCATCAACAAGAATCTTCTGAAATACATGGAGCAGTTATCGCCCAATTAGTTTGACCATCCATGCGCCACCCAAGTACAAACCAAGCAGTGGACAAGCCAAAAGCATCTGTGTCAGCGGATCCGTCGAGGGTGTAAGCACAGCAGCAGCAACCACTGCTCCAACAACAACATATCTCCAAATAGAAAGCATTTGATCACCAGAAACCAATCCAACTTGTCCCAGCAGTAGCTGGATGACAGGGACCTGAAAGGACAATCCAGTGCTGAA…	gz_contig_17740	100	971	gi|115436776|ref|NP_001043133.1|
aj_contig_150	AAGCCAACAAGTCATAACAGAGGGTTATCATCCATGACTACCATTTGCAGTCCTTTATATCCACACTCATATACCTATAAACAACATGAGCAAACAGTGATTTATACAATAACGAAAGCTGAAAAGATTGGCCTTCCGTTGCGCCTTAAAAATGTAGCGGCGTGAAGGTGAGTTAGTCATCGGTGGTCTTCGCTCTCATGCAACCACAAGGCGAGCCTCGTTTCTGTCTGCGACTGTCCCGCCTTCGGCCATAGAGATACTCTACGAGCTGCACTTTCGACCGCCACTGCAAGGCTTTCGATGTCTTTCTGCTATTCTGCTCCTCTTCGTACTTCAGCAAAGCCTGCTGGACCTTCTGCATTTCAACCTCCAGCCTACCAATCTTTTCAGACATTTTCC…	gz_contig_8351	100	3017	gi|242033601|ref|XP_002464195.1|
aj_contig_151	GCGGCGGCTGCGGAAGGAGCAGGAGGCTCTGCACGCTGGCAGCCTACGTGTCCCCAGACGTCCACCTTGGAGCACGCAGATGACTGTAGAGGAGCTTGATGCAAATGAGAGGCGGGCGTTCCTGGTATGGCGCAGGAATCTCGCGAGACTGGAGGAGAATGACAAGCTTGTCCTGACCCCATTTGAGAAAAATATTGACATCTGGAGGCAGCTCTGGAGAGTGCTTGAACGCAGTGATTTGCTGGTTATGGTAGTTGATGCCCGAGATCCCTTATTCTATCGCTGCCCTGATCTTGAGGTGTACGCAAAAGAAATTGATGAACACAAGAGAATGATGCTCCTTGTTAACAAGGCTGATCTGTTACCACTAAATATCAGGAAGAGATGGGCAGAGTATTT…	gz_contig_1670	99.34	1367	gi|242086310|ref|XP_002443580.1|
aj_contig_152	CAGGCCGACCCGCGCGCGCTGCAGAACAGTAGCGAGACATGGCCGCCGCCGCCTCCACCGTCTCCGGCCTCGCCGGCGCCGCGCTCGCCAGCCGACCGGCGTTCTCCACCAGCTTCGTGAGGGGCGGCCGGGNNNNNNNNNNNNNNNNNNNNNNNNNNNNNNNNNNNNNNNNNNNNNNNNNNNNNNNNNNNNNNNNNNNNNNNNNNNNNNNNNNNNNNNNNNNNNNNCGGCCGGGTGTCGGCGAGGAACCCTCTAATGACGAGGAACCTGGAGAGGAACGGCAGGATCACCTGCATGACGTTTCCCCGGGACTGGCTGCGGCGGGACCTGAACGTGATCGGGTTCGGGCTAATCGGGTGGATCGCGCCGTCGAGCATCCCGGTGATCAACGGCAACAGC…	gz_contig_9774	99.11	671	gi|226498632|ref|NP_001150218.1|
aj_contig_153	TCAACAACAAGCATCATAAATCAGCACGGGAAATTAACGGTCTAGCTGCAACTATGAAAGGGGCCATTCATGCCACATAAGATCCGATAAAAAGAAACAGTTTGGAGCGTCTAATACAAGGCTGCTCTTCTGACAATTGTAGCTTAAGAAAAAAGATATAGGTGGTGTGAAGGCTGTTCTTCTCTATATCACTGCTGATGTTTGTCCACCTTAAATTTCTCAGCGAAGTTTCTCCTTCACAGAGTACTTCTTGGCAGCATCCCGCACCTTTTCAATATATCCTTCAATTGGTGGTGTGAGTGTTGCCATGTATCGGTTTGCAGGGAATGGTGTCATGTCAGGTACCAGAGCGGCAGCTTGCAGCTTCTCAGGGAGGGCAGCAATGGCCTCCTTTTTAAG…	gz_contig_16521	100	794	gi|326534332|dbj|BAJ89516.1|
aj_contig_154	CATCCAAAAGCAACGATTTAAACGAAACAGAAAGAAAACATAGAATATAACGCAGGAATCTCATGAGGTAAACCACAATTTAGTCCAATACATCGATACCATGACAGTACTTTAAAGACACACAAATAAGGTGCATAATATCCCAAACGACAAAACTTAAACTTGCTCTAAAACCGCTAGATAATAGGAGACACCGATCAAACGCATCATTTCTTCTTTGCCGCAGCCTTGGTAACCTTGGCACCGGTGGGGTCCTTCTTCTCCACATTCTTGATGACACCAACAGCAACCGTTTGCCTCATGTCACGGACAGCAAATCGACCAAGAGGTGGGTACTCAGAGAAGGTCTCCACAACCATGGGCTTGGTGGGAATCATCTTCACCATACCAGCATCACCG…	gz_contig_445	96.79	560	gi|2996096|gb|AAC15413.1|
aj_contig_155	GCGTCGTGGTCGCGGTACAACGCCGTCGTCGCCGCCGCCGCCGGGACGCGGATCGGACCTGCCAACTCCGTGCCTGCCGTCGAGCGGGTCCAGCGCGGGATGGCCACCCAAGCTACTGAGCATCCCTTCAAGACTATTCTTACCACCCTCCCTAAGCCCGGAGGTGGTGAGTATGGGAAGTTCTACAGTCTTCCTGCACTAAATGATCCAAGAATTGATAAGCTGCCCTACTCCATTCGTATTCTTCTAGAGTCAGCTATACGCAACTGTGATAATTTCCAAGTTACCAGTAGTGATGTTGAGAAAATCATTGATTGGGAAAACACAGCTCCAAAGCTGGCTGAGATACCGTTTAAGCCAGCACGGGTTCTTCTTCAGGACTTCACTGGAGTTCCAGCA…	gz_contig_3527	100	2318	gi|242080811|ref|XP_002445174.1|
aj_contig_157	TCGGAGGCGGAGAATCCGCCAGTGGAGGCGCAACAGCTGGTGGAAGGGCTACCCGATGAGGTCGTGCATAAGATTACCAAACAGGTGGAGTACTATTTCAGCGATATAAACTTGGCTACCACAGAACATTTGATGAGGTTCATTAGCAAGGACCCTGAGGGATTTGTGCCGATATCGGTTATTGCTGCTTTTAAGAAAATAAAAGCCATGGTGCATAATAACTCGATGCTTGCCGCGGCTCTTCAAACCTCATCAAAACTTGTTGTAAGCGAGGATGGGAAAAGAGTGAAGCGTCAGGAGACATTTACTGAAGCTGATTTGCAGGAGCTCCAGTCTCGAATTATTGTTGCAGAAAATCTTCCTGGTGATCCTTCCTACCAGAATCTTAAGAAGATATTT…	gz_contig_5086	99.64	827	gi|242085268|ref|XP_002443059.1|
aj_contig_159	CCTGTCTGTCCAGTGGACACCACCACGGCTTCACTCACTCTTCGCCATCATTCATCTCTTTCCCAACCATTTTCCTCTCCTCCGTAGGCGCGGCCTGTGCTCCTGCTTGCTTTGCTGCTTTCCTCTTTGTTAAAAGGCTGCTCCCTCGCTCACCTCTGATCGCGCGCACTACTGAGTACTGACTGCCTTGCCAAGGTCAAATAGCCATCCTTCCAACACATCGATCTTTCTTTCTTTCTTCTTCGCCTCGCTTTCTTGATCCCAAGCGAGCGCCGAGCGAGCTGCTGCCCTGCTTCTCATGGCGTCCACCGTCAGCGACCAAACGGAGCAAAAGCTCAGCCAAATCCGCCTTTGACCTCCCCACCTCCTACAAGTAGCTCAGTTCTGTTGTTAGCTCAC…	gz_contig_13675	100	1403	gi|293335787|ref|NP_001168683.1|
aj_contig_160	CCATTGCACTCTCCGGGTTGGAGCACCTTGCTAGTGTGGATGAGAGATTTGCGAAGTACAGCAACACTCTGTTCAGTGAGACCAGCCTTGACGTGAACCGTGAGCAGCTAACGCCCAAGGAGAATGACAGGATCAACAAGTCAATATCCACCTACCTTCGCCTTCTAGCTGGTTATTTGCAGCTTCCAGCTGCCCTCAAAACCCTTGAATACCTTATCCGCCGATACCNNNNNNNNNNNNNNNNNNNNNNNNNNNNNNNNNNNNNNNNNNNNNNNNNNNNNNNNNNNNNNNNNNNNNNNNNNNNNNNNNNNNNNNNNNNNNNNNNNNNNNNNNNNNNNNNNNNNNNNNNNNNNNNNNNNNNNNNNNNCCGCCGATACCTAGTACATGTATACAACATTG…	gz_contig_5221	99.91	3521	gi|242052005|ref|XP_002455148.1|
aj_contig_161	CCATCCATCGCCGAGCTGGAGACCTCGAGCGGTTAACCGAGCCGAGCTTCTCGTCTCTCCTCACTAGCCAGCTGCCAGTGGTGCGTGAACACAGACGCTTCTCATCAGCTTGAAGCAGCGCCAAGCTTGAGTAATAGTAATACGTATTAGCATCCCGCCCTCCAGCCATCGAAGAAGAGCGACCTCGAGCGGTTAACCGGGCCGCTCTTCCCTCCTCGAACCCTGCTGCCAGTGCGTGAACGGTGAACCCATACTCCTGTGATCAGCTCGAAGCCACGCCAAGCTTGAGTAGTTTCCTGCGACAAGTGATCATTCCCTCTCCGCCGCCGGCGAAGCGAAGCACGACGAGACATCGAGGATGTCCGGCCGGAGGTCGTCGCGTGGCAACATCTCCGACGA…	gz_contig_2438	99.47	1136	gi|357124737|ref|XP_003564054.1|
aj_contig_163	CTAGCTGCAGTATACTAAGAGCTACTTCTTAACTAATTAGCCATGGATTTGATCAAGCTCAAGGAGGACGAGGGGAGCAATACTCAGGCGGCACGCACGGAGGCTGTGGCCTCCGGCAACAAGGAGCACCAGAAGGATGAGAAGCAACAGCAAAGCTTCCACATGGAGCCGATAGGCTACATCGACTTTAACGGTGCTCAGTTTGGGCCATCATATATGGTTAAGAAATATGAGGCGAAGATCAAGCAGAAGGTGGAGGAAAGGGTCGGCTTGTTCAGCGAGGCGGAGGCCACGAAGCGCGAGGAAGAGGCTGTTGCTCGGGAGAAGGAGGAAACTGCCGGCTGGGAGAAGAGCAAGAATGTCTACGAGTTCTGAATCATACGCAATCAAAGTGCATGT…	gz_contig_16112	100	596	gi|149392563|gb|ABR26084.1|
aj_contig_164	CAGAAGGTCTCCCGCAGCTTCGCCCTCGTCATCCAGCAGCTCGGCCCCGAACTCCGCAATGCTGTGTGCATCTTCTACCTCGTGCTACGCGCCCTCGACACTGTTGAGGATGACACCAGCATCCTGACCGAGGTGAAGGTGCCCATCCTCCTGGAATTCTACCGGCACATCCACAACCGCGACTGGCACTATTCATGTGGAACAAATCACTATAGAGTGCTCATGGATAATTTCCACTTCGTGTCCACGGCTTTCCTTGAGCTCGGTCAACGTTATCAACAGGCAATCAAAAAAATCACTAGACGAATGGGAGCGGGAATGGCAAAATTTATATGCAAGGAGGTTGAAACTGTAGATGACTATGATGAATATTGTCACTATGTAGCTGGACTGGTTGGC…	gz_contig_13789	100	1349	gi|212275798|ref|NP_001130502.1|
aj_contig_165	ACCATTCTACCAGAAGATTAACAGCATGGAATCAATTTTCTTGTACAACACAAAATGAAAAGAAAAATAAATAAATAGTGGCATCCATATGTAACACTAACTTTACACCCGAATGGCTGATTTTGACTTTACAGGAACTACAGTACCGACTATAGCTCAGCCGTCCCATTTCTTGGCCATCTTTGAATGCAGTGTCGCCTCCGCCATTTCTTAACCACGGATTTACATTCAATGTGACGAGGAACTTCAGTAAACGTGGCAATCTCAGACAACATGATCATCACCACTAGCGAAAGAACCAACATCACTAGATATTCGCAGAAGATGTGCCAGCTCTAACCGGTACTCCAGACCCCGTATGTAGTGACCCAGCAGCATGCACCAGAACAACAACCGTGC…	gz_contig_12621	99.37	947	gi|242038869|ref|XP_002466829.1|
aj_contig_166	GCCCAGCTTGCCCGCGGACATGGTGGAGGCGGCTAAGACCGTCGGGATACAGAAGCTGCTGCTGCTCAGATACCTGGACATGCAGGCGTCGGTTTGGCCCCTGGGTCCTGCCATTCGGTCCTGCTCGCTTCTCCGGAACAGGATGCTGGTTGATCCTGCATTCCTCTTCAAAGTTGGGACGGAGATAGTCATTGACACGTGCTGCGCAACATTTGCGGAGGTTCAGAAGAGGGGGGAAGAATTTTGGTCGGAATTTGAGTTGTATGCTGCAGATATGTTGGTAGGTGTTGTTGTGAATGTGGCTTTAGTCGGCATGTTGGCACCGTATGCTCGATTCGGTGGAGGATCTGCATCTCAAGGTCTCCTTGGGCGTGTTAGGCGTGCTTATGATGCCCTCCC…	gz_contig_3905	100	746	gi|115471329|ref|NP_001059263.1|
aj_contig_167	TGATCATCAACAGTTTATTCTGAACAGCCATCCGTAGGCACCGTCTAATAAACCTCAGCACGGAGCAGTTCAGAAGCTGGCACAGTTCAGCTGAGTCTTAAAGCATTGAGATTACATACGCTGGCTGCATTACCAGCTCAAGAAAAAAAAAATNNNNNNNNNNNNNNNNNNNNNNNNNNNNNNNNNNNNNNNNNNNNNNNNNNNNNNNNNNNNNNNNNNNNNNNNNNNNNNNNNNNNNNNNNNNNNNNNNNNNNNNNNNNNNNNNNNNNNNNNNNNNNNNNNNNNNNNNNNNNNNNNNNNNNNNNNNNNNNNNNNNNNNNNNNNNNCAAGAAAAAAAAAATCCTCTTACGAGTTCATCAGACATACAATGATACAAAACAAGGGAAAAGAGTAGTGCGA…	gz_contig_1751	99.93	4565	gi|242078217|ref|XP_002443877.1|
aj_contig_168	GGGCCCCCTCAATCCATCTTCTAGTACTTTTAGGCGCAACTGGTACTTTTCCTTTAGTTGGGCTTCGGACCGTGCTGTTCGCTCTGCAATAGCAAGTTTGTCACGAAGTTGCTGCATCTCACCCTGCAGGAATCTACGTTCCTCAAGCCATTGTTTAACAGGCATTACTTTGTCATTAGCATCTTTCCAGTCATTTGCAACCACTACGGCAACTCTGTTTGCGTTAACTTTTGTTCGAGCAAGTTCACGTTCTAGAATCCGTTTTTCTTCATTCAGTTCTTGAATTTTCCGCTGGGAATCTCTAACAGCATTGGCAGCTGCACCACCAGCAAGAACAGCTTCTTCTAGCTCTCTGACAGTTTGACTAAGCTTTTCTACTTCAGCAACTTTCTGGCGGTG…	gz_contig_4441	100	491	gi|115448541|ref|NP_001048050.1|
aj_contig_169	CCCGCTTCGATTCGTCTCGTGCCCTAAGATTGCTGAGAGAGCTTGGCACAAATGTCACAGAAGATTTGCTCGTGCTGATACCAAATTTGCTGTCGTTTTTGAAGCACGATGATCCTGCGGTTATTAAGCAATCTATAGCTAGTGGGACAAATTTATTTGCTGCTGTATTTGAAGAGATGGCACTTCAGATTGACAAGTTTGGAAAGCTTGATGCTTGGCTTGAAGATACATGGGCCTGGATGAACCAGTTCAAAGATGCAGTCCGTGTTATGATGCATGAGCCTTGTCCTATTGCAGCTAAACTACATGCTGTGAAGTTCTTTGAAACATGGATCTTATGTTTCACACCTCCCCACTGTGACCAAATAAATACAGAAGGGAAAAAATGGAAACTTGATA…	gz_contig_9380	100	4178	gi|414880870|tpg|DAA58001.1|
aj_contig_170	GTAAAGGTCTAAAAAGGAGGAGCACGAGCGCCGCAGCAGCCCTCCGCCTGCCGCGCCAGCGAATCTCGCCACCGTTTTAGGTACATCATTGAAGGAAGAAGGGACTCTTTCTATCTATCATGTCAGGATCAGGATCTACACCATCATCGAGGCGAAACAGCTTCAATTCTTTATCTAGAGACCTAGAACTTCCTTCAGAGCAAGGTTGTCTCTCCATCGTCGTACTTGGGGCTTCTGGTGACCTTGCCAAGAAGAAAACATTTCCAGCACTATATCATCTTTTTGACCAGGGATTCTTACAATCTGGCGAAGTGCATATATTTGGGTATGCTAGGTCGAATCTTTCTGATGATGGGTTAAGAGAACGCATTCGTGGGTATCTCAAGGGATCGCCAGAAG…	gz_contig_1529	100	1613	gi|226491622|ref|NP_001150684.1|
aj_contig_171	ATCGCAATGGCGGGCAACGGGGCGATCCTCGAGAGCGACCCGCTCAACTGGGGCGCGGCGGCGGCCGAGATGGCCGGCAGCCACCTGGACGAGGTGAAGCGCATGGTGGCGCAGGCCAGGCAGCCCGTCGTCAAGATCGAGGGCTCCACGCTCCGCGTCGGCCAGGTGGCCGCCGTCGCCAGCGCCAAGGACGCGTCCGGCGTCGCCGTCGAGCTCGACGAGGAGGCGCGCCCCCGCGTCAAGGCCAGCAGTGAGTGGATCCTCGACTGCATCGCGCATGGCGGGGATATCTACGGCGTCACCACCGGGTTCGGTGGGACCTCGCACCGCCGCACCAAGGACGGGCCCGCGCTCCAGGTCGAGCTCCTCAGGCATCTCAACGCCGGCATCTTCGGCACT…	gz_contig_514	99.87	2270	gi|242065818|ref|XP_002454198.1|
aj_contig_173	TTAATTTATTCACAGCTCCACTACACAGATTTTCTGGAGATGGAGCAGTGCCAAACACACCCTAAGTTACTTGAGCTTCAAAACATGGGTTGTTCTCTTAACTCTTTACCCATGCTGCTTTCTGAGGCTCTGAGTTTCCATCTAGCCTGCAAGTTAGTTTCAATTCTCTACTAACTGCGATGCCAAGCCTCGTAGGAGCTCAAACCCTGCCATTTCTTCCATGATACAGTTTTCATTGACTTGTAACATACATGTCCAGACTGACCCTGGAATAAAATAGATCGCTGTTCCCCATAAAAGCTGATTGTTTTTCTCCATTACTGATAATTCACTGCAGAATCCAAGAAGTTAAAACACAATTATGTATATGTCAAGCTAAAGCTCTTCATCTTCAGCTGC…	gz_contig_6015	99.15	1403	gi|238013454|gb|ACR37762.1|
aj_contig_174	CTTGTTGTTCCCGTTCTTGATGGTGTTTCAGCTCTCTGCCCTGAATCAAGAAGGTGATGCTCTGTTGGACTGTAATGAACGGGATGTCAGCCCTTGTTCTAGGTTCGGTGTGGAGAGCTCCAATGGTGGAAGCGTGATGGCCCTGAATATGAGGAGTGTTGTGGCCAGAAAACTTCTAGAGAGCAAAGAAAAGGATTCCCAAAAGAACAAGATCGATGCACCTTCAAACTTTGAAGAAATTACCATTACTGATCCACCAACACCTCTTCTAAAGTACCCAGCAATATCACATTCACACGACAGAGCATCTCCACATCTACCATATCCCCAACCGTCGCCATCTCCTGAGCCCATTCCACTCCCTCCTGTATCTTCGGTCGTAAAGCAAGCTGCAAGCCA…	gz_contig_17053	100	782	gi|413945682|gb|AFW78331.1|
aj_contig_175	CAAAGAACCAACTCCAGCACAACCAAGCATAGCACAATGATATTCACAGCCCGGACAAGAAAAAGCTAACACAACTACATGTGGGAAGAGGGGTCTTCCAGCCTATACAACCTGAACGTGCACTGTCTCGATAAAATGAGAGCGTGCCGCAAGGCTAACCTCACCGAAGGATTACCTTCACTATAAAGCNNNNNNNNNNNNNNNNNNNNNNNNNNNNNNNNNNNNNNNNNNNNNNNNNNNNNNNNNNNNNNNNNNNNNNNNNNNNNNNNNNNNNNNNNNNNNNNNNNNNNNNNNNNNNNNNNNNNNNNNNNNNNNNNNNNNNNNNNNNNNNNNNNNNNNNCCTTCACTATAAAGCAAGCCGTGTCAGATGCAAACATACTCTTCCCCAAACTAAAAAGT…	gz_contig_12244	100	821	gi|357138208|ref|XP_003570689.1|
aj_contig_176	AGCTGCTGGGCTTTCTCTGCTGTGAGCACAGTTGAGAGCATTAACCAGCTTGTCACTGGAGAGATGGTCACTTTGTCAGAGCAGGAGCTTGTGGAGTGCTCCACCAATGGAGGAAACAGTGGCTGCAATGGCGGACTCATGGACGATGCCTTCGACTTTATCATAAAGAACGGAGGGATTGACACTGAAGACGACTACCCCTACAAGGCTGAGGATGGCAAATGCGACGTCAACAGGAAAAATGCCAAGGTTGTGAGTATTGATGGCTTTGAAGATGTCCCAGCAAATGATGAGAAGTCACTACAAAAGGCTGTTGCTCACCAGCCAGTCAGTGTTGCCATTGAAGCTGGCGGCCGCGAGTTCCAGCTTTATAAATCGGGTGTTTTTAGTGGAAGGTGT…	gz_contig_12272	99.57	689	gi|359359066|gb|AEV40973.1|
aj_contig_177	CGTCATCTCTCCCCTAATATAACGCGCGGATCGTTGCAAGGCACATCCAACTTTGCTTCTCGTCTTATCTTGTGTTCTTGCCTTCTTGGGCGAGGAGACAAGGAATCGATCTCCAAGCAAAAGCAAGGAAGGAACAAGAAGATGTTGGAGGAGCTTCTCATCTTCACTCGCGGGGGGCTCATCCTCTGGTCCTCGTGCCGGGCCCTCGGCGCCGCCGCCCTCAAGGGCTCCCCCATCGACGCCCTCATCCGCTCCTGCCTCCTCGAGGAGCGCTCCGCCGACGCCAGCTTCTCCCAGGACAACTACGCCCTCAAGTGGACTTTCCACAATGACCTTGGACTCGTCTTCGTCGCCGTTTACCAGCGCATACTGCACCTCCTCTACGTCGACGATCTGCTC…	gz_contig_1066	100	1427	gi|242037271|ref|XP_002466030.1|
aj_contig_178	AATTTTTCCGAGTCCCTTGTTTGAAACAGAAATAAAACAACCGCTAAAAATTTACCAGTTCTGATACAGTTCAACATGTTAACAGTACAGCATTAACAGTCTTCTCTAAGTTCCACTTTAGTTTTATGTAGATTCCTAAAAGATCCTAAACAAATCTGACATGCAAGTGAATTTTGTCACCCAGTTCATGGGTTAAACCAGCCACTGCAGAAAAGTAAAGGAGACTCCACTATAAATAACTCAGAGGATCCGGTCCTGAAGGTCAGTGATTATGTTGGACGCCAGTGAAGTCAACTTCTTCCCAGTTTCCCCAGCCATGTTCTTGAGCGAAGACAGATCCTGAGTGGCCTGGAATGAGATTCGATTAATCAAATCTGAAGCATTAAGATCCATATTAGA…	gz_contig_452	99.52	629	gi|242034981|ref|XP_002464885.1|
aj_contig_180	GTTTTAACTCAGTGTACCACCTGACTGACTTGCCATCATTTGTGAGCGGCAAGTACTTCGTCATATTTGATCCACAGGGTGCTTATCTTCCAAATGTATCATCAGCAAATCCTGGAAAGCGTATAGATTATGTCAGTTCTTCAGCAATTACAATGTACACGGATCAGCTTTCACCCTATCGTGCATTTGGCTGCGACATGCAAGCACCATTTCAGGGAACTTTGTTTCGTTTTCCTTTGAGGAGTGTGGAGCAAGCATCTTTAAGCAGGCTGTCAAGACAATCATACACGGAAGATGACATTTTATCTCTTTTCCTTCAACTGTACGAAGAAGCTGTATATAATTTGCTTTTCCTTAAAAATGTCCTATCACTTGAGATGTATGTATGGGAGCCTGGTA…	gz_contig_894	100	5546	gi|242074758|ref|XP_002447315.1|
aj_contig_181	ATTTTCCAATCTCAAACCTACCTCTCATTTCCCAATTACCAAACGCCACCTAAGCTTATCAAGACCAGAGGCACCTCGCACGATGTCATGCAAAACATATTTCTGGTTCTGTACCGTCAAAGTTTCACAAGCTCAGAAAAATACCGNNNNNNNNNNNNNNNNNNNNNNNNNNNNNNNNNNNNNNNNNNNNNNNNNNNNNNNNNNNNNNNNNNNNNNNNNNNNNNNNNNNNNNNNNNNNNNNNNNNNNNNNNNNNNNNNNNNNNNNNNNNNNNNNNNNNNNNNNNNNNNNNNNNNNNNNNNNNNNNNNNNNNNNNNNNNNNNNNNNNNNNNNNNNNNNNNNNNNNNNNNNNNAGAAAGACAATGTAAGATGATGAAGCACAGCCAGTACTCCAGCCTCCT…	gz_contig_4443	100	1001	gi|242080665|ref|XP_002445101.1|
aj_contig_182	GGACATCCTCCATGACCGGATGGGCAATCAGAGTTATAAAAGTTTCAAGAAAACTGTAGCACGATTGGAAGAGGCGGCAGTGTCATGCCGTGGGGGTGAAAGACTGGAGTTATTAAAACGTTGGTTGGGAGCATTGCAAGATGTTGATGCTGAGCATGGAGGTTCAGATGTGAAGTCTTCTGAGGATCAGAATCTCTCTACTGAAATGGACAATTCGAAGGCACCATTGGTTTTATTCTACGATGCTGATATTGATGGAGCTCCAATGAACTTCCGTGATGTATTCTTGTACAGCCAAGCACTAGAAGGCATTACACTGTCCATGATTCTGGAAGTTCCTTCTGAGGAGGAAGTTTCACTACTTTTGGAAATATTCGGGATATGCTTGACTGGAGGGGA…	gz_contig_6210	99.22	1529	gi|242089643|ref|XP_002440654.1|
aj_contig_183	GTTTTTTTTTTGTTAGTTCCGTACTTCAGTTCTTACTAAATCATAGTGATTTGTTTATGAGATATCAGCAGCAGCGAAGCGGCGATACTAGTCTGTGCTGGCAGACTGGTCTCCGGAGAAGGCNNNNNNNNNNNNNNNNNNNNNNNNNNNNNNNNNNNNNNNNNNNNNNNNNNNNNNNNNNNNNNNNNNNNNNNNNNNNNNNNNNNNNNNNNNNNNNNNNNNNNNNNNNNNNNNNNNNNNNNNNNNNNNNNNNNNNNNNNNNNNNNNNNNNNNNNNNNNNNNNNNNNNNNNNNNNNNNNNNNCCGGAGAAGGCACTTCCGCCGCCAGAGAATGAGAATGCTGATGACCCTGACTGTGTTGCAGAAGCTGCACCCAGGCCCCCACGGCTCCTCTGAATCT…	gz_contig_3440	99.69	1913	gi|115489202|ref|NP_001067088.1|
aj_contig_184	CTACCCCGTCCTGCAGGTTATTTGTCGTGATACGAAGTTGTGAGTCCCTGGTGCTGCGTGACCATAAAAGGTGATATTCTGCCACAAGAGCATCTCAAAGCCAAGTTGCTAAAAAAGCACCTCCAAAGCTATCTGCTATTATTTTTTCCATGGCAACCAATGAGAACCTCCCACCAAACGTCATCAAACAGTTGGCTAAGGAACTGAAGAATCTCGATGAGTCACCTCCAGAAGGGATTACTGTTATCATCAATGATGATGACTTCACCACTATTTGTGCTGATATGGAAGGCCCAGCTGGGACTCCATATGAGAATGGATTATTCCGGATGAAGCTATTATTGTCTCATGATTTTCCTCAGTCTCCACCAAAAGGATTCTTCTTGACTAAAATTTTCC…	gz_contig_14236	100	1097	gi|242093826|ref|XP_002437403.1|
aj_contig_185	AGCGTCGACAAACCGATGCTTAAACATACGCAAAGGTGACTCCGGTAACCAGATACAAACTTTCAGCAAAATAACCAATCCATACAGACAAAATAACAAATCCACATGCCTAAACCACTAGTTTTGCTATTTATTATAGCTAAAACGCCAATAAACCAAGTCATTTTGCACTATCGAAAAATTCCCAACCACCACGAATCTGAACCAACGATGTCATTTAGCTGGAAATGACACCGTCATTGAGTGATAGATTAGCCAGCTGCTGCTCAGGGGAGGTATTGTTCTGCTGGAGGTGGGCAGAGCGGAGAACCTCCATTGCCTCAGCAACCTTGGCCTTGAGAGCATCTGGTGACTCCAGCAGGTGCAGAACCTCAGTCTGGTCCATCTCCAAAAGCATGC…	gz_contig_2710	99.77	1307	gi|414588970|tpg|DAA39541.1|
aj_contig_186	AAAAAGGACGGTGGCACGCTAGCAGTATTCTGGCAACAAAGGAAACACAACTCAAGGTCCGCCACTAGGACCAAGCTTGGTCATTCACAGCCACATGCCATCTTACATGTCCTCCTCTTCCTGCCCCTCCAGCTCGTCCTCGTAATCGCCTTCATCGTCGGCTGTCGCGTCCTGGTACTGCTGGTACTCCGACACGAGGTCGTTCATGTTGCTCTCGGCCTCGGTGAACTCCATCTCGTCCATGCCCTCGCCTGTGTACCAGTGCAAGAAAGCCTTCCTCCTGAACATGGCTGTGAACTGTTCGCTCACCCTCCGGAACATCTCCTGGATGGACGTTGAGTTGCCGATGAAGGTGGAAGCCATGGACAGGCCCCTTGGCGGGATGTCACAGACACTGGA…	gz_contig_1357	99.78	1355	gi|293331107|ref|NP_001167651.1|
aj_contig_187	TTGTAAATCATACCACAAGGAGAAGCAAAACTGAGTAATATTGGCACAACAGTACTTGTTGGCGGTGGCATAGCTGAGGTTTTCAAATGCCTAGGGGTGCCTTACTAAATGTTAGTACAATATGGTAAATTGGAGCAGTTTGTCAAATAACTTTTCGCTCTCTTTCCTATCACACTGAAACCTACACATCAACGATCTTCCAGCTTGACGGTTGATGGCTTGATTTCCATTACATCTTCAGTCTTGACGGGCGATGGCTTGATCTCCTTGTTGTCGTCTGATTCAACTGCTGATGGCTCCCCATTCCCTGCCACATGGATTGAATCTTGCAGAGGCGTAGCCTTTTCTTTGGAGTTTGCGTCTACCACTTCCTCTTTGGTAACATTACCGTTTTCTTGA…	gz_contig_232	99.46	1670	gi|55771379|dbj|BAD72546.1|
aj_contig_188	AAATAAAATACCTAGCTAATCGGCAGATAACAAGATAATTCACACCACAGAAGAATCCACATGGCAAATAAAACGGTACCACTCAGTTTCAAAGCATCAAAGTATCGCCAAATCCCAAAAGTACTTAAACGACAGACAATAGGCACATTGCCAGCAGAAATAGAAGTCATGCTACATAAGCAATAGCCATGACAAAAGTTGAGTGATAATACTGAGGTATCCAGGTATCCAGAAAGAAGGCGTCCAATCGACCACCAGATACATCATTTCTTCTTGGCAGCAGCCTTGGTCACCTTAGCACCGGTAGGATCCTTCTTCTCAACACTCTTGATGACTCCAACAGCAACCGTCTGCCTCATGTCACGGACAGCAAAACGACCCAGAGGAGGGTACTCAGAG…	gz_contig_2992	100	1679	gi|2996096|gb|AAC15413.1|
aj_contig_189	ACAGGTGCCGGAGGTGGTGGCGGTGAGCTTACTGGCGCCGGCGGTGGTGGTGACTTCACTGGAGGAGGTGGTGAGCTAATTGGCGCCGGTGGTGGTGGCGACTTTACTTGGGGAGGTGGTGAGCTAATTGGTGCCGGCGGTGGTGGCGACTTTTCTGGAGGAGGTGGTGAGCTAATTGGTGCTGGTGGTGGTGTCATGGGCGTGGGAGGTGGTGAGTTGACTGGAGCAGGCGGTGACGAAGACTTCGGTGCTTGTGGCGGTGAGCTAGCTGGTACTTGCGGTGGGGAAGACGTCGCCGGAGGAGGTAGTGTCTCCACGGAAGATTTTGGTGGTTGCGATTCCTCTGGAGCTGGAGGTGATTTTACTGGAATTGGTGGAGGAGTGGCGTTATCTTGAGGT…	gz_contig_30618	53.74	680	gi|414591814|tpg|DAA42385.1|
aj_contig_190	CAATCGTCCCTTGCAATTCTCGGTGCGCCGCAGCTCGTGCTAGGGTTTCGTCCTCCCCGGCGACCGATCCCGATCTACCTGCCCCCATGGCGGCCGAGGGAGAGAAGAAGATGATAACGCTCAAGAGCTCCGACGGCGAGGAGTTCGAGGTGGAGGAAGCGGTTGCGATGGAGTCACAGACCATCCGCCACATGATCGAGGACGACTGCGCCGACAACGGCATCCCGCTCCCCAACGTCAACTCGAAGATCCTGTCCAAGGTGATCGAGTACTGCAACAAGCACGTCCACGCCGCCGCCAAGGCCAGCTCCGATGACGCCGCCGCCAACAACAGCTCCGCCTCCACCACGGCCCCGTCGGGCGAGGACCTCAAGAACTGGGACGCCGACTTCGTCAAGG…	gz_contig_4667	100	485	gi|297728323|ref|NP_001176525.1|
aj_contig_191	GCAAGCCAAAGATGTGGTGAAAACTATCAAGAAACGGATCGGACACAAGAATTCAAAGGTTCAGCTTCTTGCATTAACGTTGCTGGAGACCCTTATTAAAAATTGTGGAGATTTTGTTCATATGCATGTTGCTGAGAGGGACATACTTCATGAAATGGTGAAGATAGTTAAGAAAAAGCCTGATTATCATGTGAAAGAAAAGATACTAATTCTAATAGACACTTGGCAAGAAGCTTTTGGTGGTTCCCGTGCAAGATATCCACAGTACTTTGTGGCATATCAAGAGCTACTGCGTGCTGGGGCTGTGTTTCCTAAAAAACCAGAGAGTTCTGTGCCAATCTATACTCCTCCACAGACACAACCTCTACGGAACTATCCAGCCCCTGCTTTACGCAACAC…	gz_contig_7791	99.8	1520	gi|242093102|ref|XP_002437041.1|
aj_contig_192	ACCCTGCTCTCACCCACTAAAAATTACCAACACCTCACACGACGCCAAAAGACAACATGCCACTAACCATTTCACCAATTTGACAAGACAAGCCTCTACCACCAACAGCAGCAAAAGGCCAACACACCATCACCGTGCACNNNNNNNNNNNNNNNNNNNNNNNNNNNNNNNNNNNNNNNNNNNNNNNNNNNNNNNNNNNNNNNNNNNNNNNNNNNNNNNNNNNNNNNNNNNNNNNNNNNNNNNNNNNNNNNNNNNNNNNNNNNNNNNNNNNNNNNNNNNNNNNNNNNNNNNNNNNNNNNNNNNNNNNNNNNNNNNNNNNNNNCGTGCACCCACGACCCCGTACAAAATAAATCAGGATGCAGAAGGCCACTTTTGATACAAATAATGGCACTACAACGC…	gz_contig_15688	98.61	431	gi|242081267|ref|XP_002445402.1|
aj_contig_193	TCTTGGCGCTCAGCTGATCAACCTGTTTTATACGCAAGACAGCACTCTGGTTTAACAATTGAACTTGTACCGTCTGGGAATTCATGTCAAAAAACATTGAAGCTCGTTGTAGGATGATATATCAATTTTTTATAAATAGTTAGTTATTATAAACTTATTTGCTGATATATAGCATAACGACTAGGTATATTGTAAGCGACGGTTAATTCTTGCAAAAATTATGTGAATTTTTCATTGCTGATGGTCTGACAATGGTACATAGCAATTTGTGCTGGGTTTATTGTAAGTGATAGCGCAGCATTTTTCAATTAATAACATCCTTTTAGTGGAATCTTGGTGTTGTTCAACTTAAGAAGCGGTTTGTTGGGAGGAGACCCTCAAAAAAAGGTCACCGTGCGT…	gz_contig_16816	100	410	#N/A
aj_contig_194	CAGGGGAAGAAGGATATCCTGGGAAGAAGAGGTGTCGTAGATAAAATCGGGCACGTCTTCCTCCTCCGGAAACTGCGCGCTTCTCTTCCCCGCAGTTGCGTACAAGGAAGGAGTCCCCTCCCTCCTCCTCCCTCACTTCTCGCGCTGTTCGTTCGCGAACTCGTGAGGCGGGTTCCACCAAGATGATTGCGCGGCGCCTGCTCCGATCAGACGTCTCCTCCCAGGCAAGCAGCTTAGTGAAATATGTCACTGGCACTGGATGCTTGCAAGGGCTTGCAGATAGTTTGCCAGCAGCTTCAGTCAGACATTTTGGCTCAGTCCCATCTTCCCAATCTGACTCAACTGAAGAAAATGGGTTTAAAGGGCATGGCATGTTAGCTCCATTCACGGCTGGCTGGC…	gz_contig_7216	100	1694	gi|242074310|ref|XP_002447091.1|
aj_contig_195	ACCACTTTCTTGCTATCACTGGTGACATGGTAACTCATGTCGATTGATGTTATATTCTTCAGAAGCTCGTAAGTAACATCCTTGGCCCGGTAGGCTTTAGGATGCCATTTCCCTTCAGACCAGTCAACGTGTGTCACAGACCAATTAGCAATACCACCTGGATCCATCATATGGAATAGCGTTGGCAAATAATGCTCATCAGCATAGCAGTTGCGACCGTCTTCCATCCCAGGCCTGCAGTGATATTTGAACTTAGTATAGTAAAGACTGTCTGCAACTATCATCAACGCATGTTGGCGCTTCACTGAGAACCACTGTGAACCTTTCCTGAAGTCAGACTCTCTAACCTCAGGTAACATGTTCTTTGAGTATCTAAAATTACCATGTGGACCAGGATCA…	gz_contig_9262	98.94	1133	gi|414585539|tpg|DAA36110.1|
aj_contig_196	CTGTCTCCACTATCTCTATTTCCACCTGCTAACCAATACTCCGTATGTTGTTCTCGAATGTACAAAGATGTCCTGTATACTCCCAAAGTTCTCCAAGAACTAAGAAAAGTGTATATTTAGAATAAGTTCATGAGATTATTTATGGATTCAGGGTGGAACTTCCTCGCAAACAGGTAGCATGGTCGTTTCACTCCATTCCATAAGCAAGGGTTCTGAGTAACCACTTTCTTGCTATCACTGGTAACATGGTAGCTCATGTCGATTGATGTTATGTTCTTCAGAAGCTCGTAAGTAACATCCGTAGCCCGATATGCTTTTGGATGCCATTTCCCTTCAGACCAGTCAACGTGCGTCACAGACCAATTTGCGATACCATCCGGGTCCATCATATGGAGCAGC…	gz_contig_14412	99.34	1355	gi|242077108|ref|XP_002448490.1|
aj_contig_197	TGAACGAACACCATATATCACATAAGCGTATACCACCAGACCAGCATTACTGACACTAGCAGCAGATGCATAGAGCAGTGAGGAAAACAAATATTCATAATTTAACAGCTATACCATATTTCTATCATACCTAAACTACATAATAAACCTAAACACACAAAACTGTACACTCGCATATCTAAGGAAGCATCAAGTATTGATGCCTGGCTTCTCCGGCAGGAACTGCTTCATCTCCAAAACTTGATTGCCTTCCACAACATCGGGGAGCCCAAGAGATAGAGACAACGGTTCAGCTTCTTCAATATCTGAACCAGCAATATTATGCTTTGTTGCCACTGTAGACAAAGACAGCGGCAATAAAGGGGAGGAGCTCTCATCTGCCTTCCTAGATGCCTTATT…	gz_contig_725	100	3389	gi|242035003|ref|XP_002464896.1|
aj_contig_198	AATGCTTCAACAAGGGCAGCTGTAAACCAAACTCCGCAAATCAGGACATCACCATATTTGGTGCATTGCTAGTGGGTGCCTTATGTTTAGTGCTGTTGATCATTTACAACTTCTCTGGACAACTTCTGATGAACCGGGAGAAGAAGCAAGCAAAATCCAGGGAGGCTGCTGCAAGACACGCAAGAGAGACAGCAATGGCTCGTGAAAGGTGGAAATCAGCTAAAGATGTTGCAAAGAAGCACGCTGCAAGCCTGCAATCATCACTGTCCCGCACATTCTCACGCAAGAAGACCCTCAGGTCTCACGAACCATCCAAAGGAATCGAATCTGATGCTGTTCCATCAAAAGAATCAGGAGGGAAGAACAGTAACAATCTTACTGACATGATGCGCTCACTTG…	gz_contig_3928	100	611	gi|413954191|gb|AFW86840.1|
aj_contig_199	TTGCATATCAGCCAGTAGCTTAAGAACATGTCTTTTGATCCGTGGTAGCAGTAGACATACTACCACCGAAGGCACTTACTACTACATAACATGAGAATAATAATAATATAACCAAACATACGCAAGCTCCAGCGCAAGCAAAAACCACATTGAGGATACAACAGGCTGCAACAGGCTCCAAACCCCTTACTCGTCATGTTCTGCCTCCTCCTCATCCTCGTAGTCACCCTCCTCATCAGCGGTGGCATCCTGGTACTGCTGGTACTCGGACACCAAGTCGTTCATGTTGCTCTCCGCCTCAGTGAACTCCATCTCGTCCATGCCCTCACCAGTGTACCAATGCAAGAAAGCCTTCCTCCTGAACATAGCAGTGAACTGCTCGCTCACACGGCGGAACAT…	gz_contig_4060	100	1301	gi|115436006|ref|NP_001042761.1|
aj_contig_200	CGCCAACCCTCTCCGCTGTCCAGCACGCGCCGGCCCGCTCCCGTTCCTGAGGCAGCTAGCAACCTCGAGATCCAACCATGAGGGAGATTCTCCACATCCAGGGCGGCCAGTGCGGCAACCAGATCGGGTCCAAGTTCTGGGAGGTTGTCTGCGACGAGCACGGCATCGACACCACCGGCCGCTACGTCGGCACCTCCGACCTCCAGCTCGAGCGCGTCAACGTCTACTACAATGAGGCGTCATGCGGCCGCTTTGTGCCCCGCGCGGTGCTCATGGACCTCGAGCCCGGCACCATGGACAGCGTCCGCACCGGGCCGTATGGTCAGATCTTCAGGCCTGACAACTTTGTTTTCGGCCAGTCCGGCGCCGGGAACAACTGGGCAAAGGGCCACTACACCG…	gz_contig_4142	99.33	1352	gi|8928423|sp|Q9ZPN7.1|TBB4_ELEIN
aj_contig_201	TTTATCATTTATCAACAAATGACTATTTTCATACACATACAAAAGTTTCAAACAAAGTAGTCAAGACACGGGTGTGCAAACTTCACAGCTACAAGCATGTAGGTGTCATCAGGTGTTTAGATTTTATGACAATACCAAACATATCCCAAACTCTCAACCTGAAACCACGTGAAGCTTAAAGACATCCTAATCAAACTGGAAGCGCCAAAGCACTGCCTCTTATTGGTATTTGGTGGTCACCCTTTGCTGTGCTCTTAGGCGGATGCTGTGGCAGCGGAATGGTGCTGCTCCACCTTAGCCTGGAGATCCTCCTTCCTGGCACCAACGACAGTGTCAACCTTGTTGCCGTCCTTGATGAAGAGGAAGGTCGGCATGGCCTCGATTTCGTATTCCGCAGCA…	gz_contig_940	100	527	gi|82407383|pdb|1WMJ|A
aj_contig_202	TTTGGTGAGAAAAACATGGTATCCAACGGTTTGCCACCTAAGGTAGAACTTGCTCAAGGTTCCCTGTGCCAAAATCCCGGAGTCTACAGATTAGCAGGAAAACATGGACGTGATTCCTGCTGCTTTACGCTGTCCGCCACGTGCGCGATAACTCCAGCACCAGCATTGTGAAGCCACTCATTTTTTACATGTATGTTATTATGAGCAGAGTAAGGCCATAACGAGGAATGGAAGTTGACGTCGACCTTCTTCCAACCGACCTTCTGCAATCCATGGATCATCTCCTCTTCCATAATTTTGTGATATTCTTCTGTATTTTCTATGTTTGGTGTTCTTTGTGCAGCTTCTTTAGCTCTGGCAGCTTTGGAAGGAAAATGGGGACCTTTCGATGATATGGGT…	gz_contig_6352	100	1514	gi|242092020|ref|XP_002436500.1|
aj_contig_203	CCAATATTCAAGAGAAAACCTATGCGCCAGAAAAAGAACATATGGACAACTTTACAAATTACAGTTGCTGCAGTTTGCCACCGGTAAGGCTAATCACTTGCATTCTACTACTAAGCATCTGTCAAACATCATTGTGATAAAACCATGGATACCAGCCTTCTCATGCCAAAATCTATCAATCTCCAAGTGATGCACAATATTGTTCGCTTTGTTCGTCTGAAGCAACAAACGGTGTTCACACCTGCATCGGAACTCAGCCGAGCTTCAGTCAATGCTTGCTAGTGGTGTTCAAGTACTGAAAATGTTGCCTGGGTCTCTTTGCCTGTTGTTAGAGATCCTTGCGCAGAACATGAACATCAACAAGAATGTAGATAGCATAAATAGCCTAAAGTACGTCCT…	gz_contig_5760	99.79	1451	gi|293336018|ref|NP_001169919.1|
aj_contig_204	GAATGAAACTGTTCACCGACTGGGATACTGGTCTGACTACTGCAACGAGGTAAATCATACCACAGGGGCAAGCAAAACTGGTAACTTCGGTACGATGGTACTCCTATTAGCGGGGATATAAATGAGGTTTCCATATGTCTAGGGGTCCCTTACTAAATGTTACAATATGGTAAACTAGACCAGTTTGGCCAGTAAATTAACTGGACTCTCTTTCCTATCACTCTGATACCTACACATCAACCATCGATTTCCATCTTGTCATCCGATTTGACGGTCGATGGCTCTCCATTCGCTGCCACAGGGATTGAATCATGCAGAGGCGCAGCAGTTTCTTTGGAGTTTGCATCTACCAATTTCTCTTTGGTGGCAGTACCGTTTTCTTGAACTATCAGGATCTGT…	gz_contig_781	99.44	1616	gi|37542684|gb|AAL47211.1|
aj_contig_205	TCTCAAAATAACATCAAATAGAACCAGAAAAGAATCAGGCACCCATACAACACAAAAGAAACATAAGGATTGGCTGCAAATAAAATTCAATAACAGGTTCACAAGATGATTGATATGTCTTGGTGCAAAACTCTTCATATAATTAGAACAATAACAGGCCAACTGAAGGGTAGGTTTCCTAGATAAGCCATTCGACAGAAGAATGGTGACAAACGTCATGCCAGCAAGATGTCTCGTCTGACTACTATAGCCGGAGAAACAAGCAAACATGTCATCATCACCACCATGCATTTCCATCAGTCTACTTAGATCTCTGCCTCATCTTTCGGCGCTTCCTCTTCAGCCTCCTCATACGCTTCTTCTTCCACTTGGCCCTCATGGTCGCCTCCTTGCGAGCCC…	gz_contig_16208	96.12	308	gi|357406214|ref|YP_004918138.1|
aj_contig_206	CGAACCGCTCCTATTCTCCGGTCACTACCCCTGATCTCCGTTGGTGCTCCTCCGCTGTCTGAGCTCGCGTCGCCTCCTCTCCTCTCTCGCCGTTCCGAAGAAGCCATGAACTGCCTTCAGAACCTGCTCAAGGAGCCTCCAATCGTGGGATCCAGATCGATGCGGCGTCCGACGCCTCTCAATCTGGCGATGGTGCGTGGCGGGAGTCGCCGATCAAACACAGTCAAAACTGCACCTGGGGCGTCCACATCTGGCGCAGAGAGCAGTGCAGTCGAGGCCGAGAAATCTGATGCCTACAGTACTAACATGACACAGGCCATGGGTGCAGTGTTGACGTACAGACATGAACTCGGGATGAACTACAATTTTATACGCCCAGACTTGATTGTTGGCTCCTGC…	gz_contig_1378	100	710	gi|219362899|ref|NP_001136639.1|
aj_contig_207	CCTCGGTCACGCTAATCTCACCGTTCTCTCTTCTCCCCACATTCCTCCCTGCCAGTGCCCATCGACCAGACGACCATCCCTGCCCTCCCTTTCCCCTTCACCTCCAAGCAATCCGGTCAGAACCCTAGCCCTGTAGCCCCGCGATGTTCGGCTCCGGCGNNNNNNNNNNNNNNNNNNNNNNNNNNNNNNNNNNNNNNNNNNNNNNNNNNNNNNNNNNNNNNNNNNNNNNNNNNNNNNNNNNNNNNNNNNNNNNNNNNNNNNNNNNNNNNNNNNNNNNNNNNNNNNNNNNNNNNNNNNNNNNNNNNNNNNNNNNNNNNNNNNNNNNNNNNNNNNNNNNCAAACGCCCCGATCCGGTCGATAGGGATTTTCATGAAAGCAGATTGGGAAGACCATTTGTCA…	gz_contig_187	100	1106	gi|242058719|ref|XP_002458505.1|
aj_contig_208	TATAAAGCAAAAAATAGCAAGTGCAAAGCTGAAAGTAGCTCAACATAGGTCACTTTGATAATATCAAATTCATAGGTGTCCATCACATAAAACTCTCGCTTCAAATGAAACAAAAACACAGATGCCTAATTCAGTAGCTAGTAACTTAGATGATGCCGATCTTGTTGGCCACATCAAGCGCATCATAGTCTGGCGTCAGCTTCACATAGGCCTTCTTCTTCCCATCAGGCCTGATGAGGGTGTTGACCTTCTTCGCCTGAATGTCATACATCTTCTTGACAGCAGCCTTGATCTTCTTCTTGTCTGCCTTGAGGTCGACAATGAAGACCAGAGTGTTGTTATCTTCAATCTTCTTCATTGCAGATTCAGTGGTAAGGGGGTACTTGAGGATTTGGTACT…	gz_contig_9842	100	461	gi|226503351|ref|NP_001150284.1|
aj_contig_209	ACCTGCTGCAGCACCAGCAAATCCAGTATTACTGGAAGAAGCAAAGCCCCCAGATGTAGAAGCACTAGCAAATCCACCAAATCCTCCTGCACCTACACTTCCTAACTGGCGTGATTGTCCAAAAGAACCCAGCACTGATCCAAGCGCCTGTTGAGAACCAAACTGTGCAGGCTGCCCAAAACCTGATTGCTGAGCAGTCCCAATTTGTGCAGGCTGCCCAAAGCCTGACGGTTGCCCAGATCCAATTTGTGGTGGCTGACCAAAACCGGATTGAATTTGTGCTGCCTGCCCAAATGCTGCCTGCTGACCAGCACCAATTTGTGCAGGCTTCCCAAATCCTGACTGCTGGCCCGATCCAATTTGAGATGGCTGTCCGAATCCAGTAAGCCCGCTTGAGAA…	gz_contig_12418	99.84	1868	gi|414888159|tpg|DAA64173.1|
aj_contig_210	TGAATAGGTATTATGGTGTGCTGTAAGAAAAGCAAACACGTGTCGATCAAGTAAAAGCAACAGCAACAATTGAAATTCGTGGAACAAGACATCTCACAGCAAGTTGTAAACACTGCAGCTAGTATCCATTTCAGACATGACATGTCTTTGTTTCGCAGAACTCAGTAGTTACTGCACCCAATAATTTGAGAAGAAAATAAGAACTTCCTCCTGTAGTTTAACAAGGGCTGCTCGGAGCTGAGTTGTATATCCAAGGTTCTTGGCAAACGCATCAGCCTGAAATTCAAATGCTCTGCTGACAAGATTCATGCAGAAACTCAGAAGGTGCTGAATAGGTATTATGGTGTGCTGGAAAATGATCAAACCAATTATTATAGGCTGATCCTTGAAACCAAAACT…	gz_contig_4817	100	1163	gi|242066374|ref|XP_002454476.1|
aj_contig_211	ACCAGGGAGAGAGGGACACGACAGGAAGCGAGTCCTTTCTTCCTTGCCATCCCTCGCCGCCCCCTCCAGTCCCAGCTCCCACACCCACCCACCCTTTCCCTTCGATCGGACGGAGGAAACAAAGATGAGCTCCAAGCTCTTCCAGGCGGCGTCCAAGGCCGCTAGATCCCTCCTCTTCTCCTCCGCCGCCACAGGCCTCCTCGCCGCCGAGGGCCGCACCGCCGCTCTCGCCNNNNNNNNNNNNNNNNNNNNNNNNNNNNNNNNNNNNNNNNNNNNNNNNNNNNNNNNNNNNNNNNNNNNNNNNNNNNNNNNNNNNNNNNNNNNNNNNNNNNNNNNNNNNNNNNNNNNNNNNNNNNNNNNNNNNNNNNNNNNNNNNNNNNNNNNNNNNNNNNNNNNNNN…	gz_contig_12608	100	818	gi|223974989|gb|ACN31682.1|
aj_contig_212	GCTAAACATTCCGCCAATCGAACCACACATTATTTATGATGTTAACCACCACTCATCCTTATATTTTTTTTAGATAATTACAAAACCCTTCAAATCTTTACATTATTGGACGTGAGTATCAATTTTCATTACCACGTAGTCTGCGTATCAAAGCGTAACATGTTTCTTGACACAACTATCCACAATTATGATACTGCCTCGGCATCTACAAGCTATATGCTAAGCTTGGGCCGGAAATATACGTCAGCAAATTTCTTTGTAATGGAATCAACACAGGCCATTCTTATTCTTTCAGGTGTCACTGGGTTGTCAAGGGGGAACCAATCGGAGTAGCCCTCCTCAGCTCTTGCAGCAATTATTGCATCTTTTATCGCGAACAAGACAGCTGACCCGAGAAAG…	gz_contig_1049	100	3326	gi|357121299|ref|XP_003562358.1|
aj_contig_213	CGAATACATTTCTCTGCTCGCTTGGCTTCAGCGCTGTTCTGGATCTCCCAACCATGGCGTTCTCTCGATCTGTCGCCGTCGTCCTTCTCCTCCTCCTCGCTGCAGCCGCCGTCCCCTCCATCACCTGCAACGGCAAGGATGAAGAGGAGGACCTCCAGTACCTCATCGACAACGCCGACGAAGTCCCCGCCAACGACCCCGACGAGTGGCTCCAAGAAGAGGGCTTCCCTGACGACGAGGAGGAGGAGGACGGCGATCATCTCCTCCACGAGTCTGAGCCTGAAGACCAGATCGACGAGATCCACGTCGTCGTCCTCACCGCCTCCAACTTCTCCACGTTCCTCGCCTCCCACCGCCACGTCATGGTCGAGTTCTTCGCCCCCTGGTGCGGCCATTGCC…	gz_contig_7992	99.26	1217	gi|242063648|ref|XP_002453113.1|
aj_contig_214	CAACAGTCACACAGCATCCAAATGTTTAAGCCAAAATAACAAAATAGTACATAAACGACATTTGGGCACATTCCCAGAAGAGCATAACAGTTCGCGCAAAACTGCAATGGCCACAGACAAAAGTGATAGTAACGCACATTTTGGTATCCCAAAAGCCAGCACAGAATCAACCAGACACATCATTTCTTCTTAGCAGCAGCCTTGGTCACCTTGGCACCGGTTGGATCCTTCTTCTCCACGTTCTTGATGACTCCAACAGCAACCGTCTGCCTCATGTCACGGACAGCAAAGCGACCCAGAGGAGGGTACTCGGAGAAGGTCTCCACCACCATTGGCTTGGTGGGAATCATCTTCACCATACCAGCATCACCGTTCTTGAGGAACTTGGGCTCCTTCTCG…	gz_contig_2224	99.21	1517	gi|2996096|gb|AAC15413.1|
aj_contig_216	GCCCGAAGAGGAGAGGGGAATTCGTCGACGCCTTTGATAGGATTTGGGACCTCTGAGCAGGAGGAGAAGAGTTGAGGGTCGTTGGTTGCAGCCAACGGGGGGATCGGAACTTCGTGGGATTTGAAATTTTGATGCTCTAATGGAGTCCAAGGGCGGCAAGAAGAAGTCTAGCAGTAGTCGTTCCTCCTTGATGTACGAAGCTCCCCTCGGCTACAGCATCGAGGACATCCGACCGGCCGGCGGCATCAAGAAGTTCTCCGCTGCATACTCAAACTGCGCGAGGCAGCCATCCTGATAGCCCTCTCGAATTCATCATAGTAGCTTAGAATCAATCTTCACTTCCAATCTGCTCTCCTAAATCTCTCTGGCTAGCTGCTTTCTGGTGACCAAAAGCTTTCT…	gz_contig_9498	100	1799	gi|288300152|gb|ADC45379.1|
aj_contig_217	ATGAAAAGCAACTTTCAATTTACCCTTGCTCCTATCTAAAGACAAGCGGATACATTCATGCTGAAATACCGTATTTAATACACAAAAAATAAAAAATGAAAAACAGTGAGCAAGATAAATTAGACACCACCTTGGATACATGAACCAACAGATTCAAAAACTTTACACCAACAAAAACGATGTCTAAGATTACTTACTTGGGTATACCAGAACTGTGATTACATCCATCTCATCTTGTGCGAGCGTAGTGGCTACATCCCTCATCACAAAAAGCCATGCCAATTCTGTAAGAGCCCCTTTTTGACAGGGTTGCTCCCATTTTCCTTGAACTTCCTTATAGTTAAACTAGCATACCCAGTACCGCCATCAAAACTTAGCTTCTGAGAGGAATCTGTCCAT…	gz_contig_4032	100	3287	gi|414869476|tpg|DAA48033.1|
aj_contig_218	CTTACGGAAGAATTAGCAAAGGTTGATGGAAAGCTAAAGCTTACAGAGTCTCTCCTCGAAAGCAAAAACCTTGAAGCAAAAAAGATCAATGACGAAAAGAAAGCAGCACTTGCAGCACAGTTTGCAGCAGAGGCTACACTACGAAGGGTACATGCTGCTCAGAAGGATGAGGATATGCCTCCTATGGAGGCTATTCTTGCACCTCTGGAAGCTGAGCTCAAACTAGCTCGTCAAGAGATTGCAAAATTACAAGATGATAGCAGGGCATTAGATCGTCTTACAAAGTCTAAGGAAGCAGCTCTGCTTGAAGCAGAAAGGGCAGTTCAAATAGCATTGGCAAAAGCTTCCTTGGTGGATGATTTGCAAAATAAAAACCAAGAATTGATGAAACAGATCGAG…	gz_contig_4229	100	626	gi|226858184|gb|ACO87662.1|
aj_contig_220	GACACATCCAATCCCATCTTGCAATTAGAGTTTTAATATTCACTAGTTTTCTGGTATCTGCTTGCTGGAATGACCGGCCTTCAACAAGGGCCTGTTATTACGAAGTTTGATGGACAGCTCCAATGCAAGCCAATTACATGTTGCGCCAAGGCTTCGCGACTACACCAAGTATGCCGTAACTCGCTCAATTATCTGTTATCTTCTTCTACTGATTTATCAACCTTCGCTGCTGCTGATGCGTAACTCACACTACTGTCCCTCATGCTCTTGCATTGGCTAGACTGCTCATATCGAAGGAAACCAATCTTCATCTTCGTTGAGCAATGTTTCAGCATATGAAGGAAAACACTGATGGGGTGGCGCCCACATATGGTGTTTTCGTACTCCCGCAAATACTGT…	gz_contig_5848	100	908	gi|258644468|dbj|BAI39726.1|
aj_contig_221	CGTGGAATCAGGTGTCCCAAAATGAGAAGCGGAACTGTCACCTTATTGCTTTTTCCTCCACTCAAACAGAGATTACCCTGCAGCATGCAGATGTAACAGACAGCTCACTGTAGAGCATAACCATCCGGCAGCAAGCCCACATCACATCGCAAGTTTATCAGCAAACGACTGGATCACACATTCAAACAGAGTAGTCATGACACTCGGGCATAAACTTCACGATTACAAGCATCTATGGCGTTATCATAGGACAACGCCAGATATATCCAAACTCCCAACCTGAAACCACGCAAGGTTCAACGACATCTTAATCAAACTGACAGCCAACAGGCGCTGCCATTTATTGGTGGTGACCCTTCGCTGTCCTCTTAGGCGGATGCAGTGGCTGTGCCGGCAGCA…	gz_contig_739	100	776	gi|82407383|pdb|1WMJ|A
aj_contig_223	TTCCCCGCGCCGCCTCCCACAGGTAAGGAGAGGAGGAGGAGGCGAGGATGTCTCACCGCAAGTTCGAGCACCCGAGGCATGGTTCCCTCGGCTTCCTCCCTAGGAAGCGCTCCTCCCGCCACCGCGGAAAGGTGAAGTCATTCCCCAGGGATGACCCTAAGAAGCCCTGCCACCTCACTGCCTTTGTTGGCTACAAGGCTGGCATGACCCATATTGTGCGTGAGGTCGAGAAACCTGGATCAAAACTCCACAAGAAGGAAACTTGTGAGGCTGTTACCATCATTGAAACACCTCCTCTTGTCATTGTTGGTCTTGTCGCTTATGTCAAGACTCCTCGTGGTCTCCGCACCCTCAACTCTGTTTGGGCCCAGCATCTTAGTGAGGAAGTGAGGAGAAGGT…	gz_contig_62	99.77	1313	gi|242077200|ref|XP_002448536.1|
aj_contig_224	GTATATCCTCTGTAACAAAGGAATATTTGGAACAGCGTATAGAAGTCTGAACATACCGTCACATGTAATACATCCTCTGTTAGAAGGGAACAAGGTAATTTTGTTGCCAGAGCAGAAACAATTCTGCGTGAAAAGTATACATGGCCAAAGCACGCACACTTATTGCTTGAAGACAGCTATCATGGCAAACTAGAGTCTCAGAAATCATGTTTATTTTGGTGTGATCGCTATGGAAAACAGCTCTACGAAGCCTTCATGTCATCGAGACCAACACTGGCCAGAAAGTCATGATTCTCTTTAAGGAGAGGAGAAAAGGTCGTGCAAAATTTCTCAATGTCTGTTTTGATGTCACCCGTTCCGCTAATGACCTCCATAAACTTCTCCCTGTTAGGAGCAAGT…	gz_contig_581	100	1055	gi|242092030|ref|XP_002436505.1|
aj_contig_225	CCGCGTGGAGCTCGACCCCAAGTACGCGGAGCGGACATGGAAGGTCCTCGAGCACGCCATCCACGAGATCTACAACCACAACGCCAGCGGCCTCTCCTTCGAGGAGCTCTACAGGAGTGCCTACAATATGGTTCTTCACAAATACGGCGAGAAGCTCTACGACGGCCTCCAAAACACCATGACATGGCGCTTGAAGGAAATATCAAAATCAATAGAGGCCGCACAGGGTGGTTTGTTTTTGGAGGAACTGAACGCAAAGTGGATGGATCACAACAAGGCGCTGCAAATGATCCGAGATATTCTAATGTACATGGACAGAACATATGTTCCGGCATCTCATAGAACACCTGTTCATGAACTTGGTCTGAATCTGTGGAGGGATCACATAATTCACTCCCC…	gz_contig_12174	100	1412	gi|242062528|ref|XP_002452553.1|
aj_contig_226	AAGGCCGTGGCGCTGGTGCTCCCCAACCTCAAGGGCAAGCTCAACGGGATCGCGCTCCGGGTGCCGACTCCGAACGTGTCCGTCGTCGACCTCGTGGTGCAGGTCTCCAAGAAGACCCTCGCCGAGGAGGTGAACCAGGCGTTCCGAGACAGCGCCGCCAGCGAGCTCAAGGGCGTCCTCGAGGTCTGCGACGAGCCGCTCGTGTCCGTCGACTTCAGGTGCTCCGACGTTTCGTCCACCATCGACTCGTCGCTCACCATGGTCATGGGTGACGACATGGTCAAGGTCATTGCCTGGTACGACAACGAGTGGGGGTACTCGCAAAGGGTCGTCGACCTCGCTGACATCGTCGCCAACAACTGGAAGTGAAGCTGCTTTGCACCGCTGTAACTCATCATA…	gz_contig_2248	100	596	gi|326503902|dbj|BAK02737.1|
aj_contig_227	TTGCGGATCGAGTTCGTGGATCCGATCGCAGGACGGTGAGTCTCTTCTAATGTTTCCGTGTGAAACCTGTGTTTGTTTCGGGTTGCAGGTCTAGATCTGATGGGGCAGGCCTTACATGGTGCGAGACGCCGACGGATCCTACTTCGTCTCGGAAGATCGAAGGTTTTCTGGGCGGCTTCCAGTCGTGGGGATTGCTTTGCATCTTGGACGGGATGCTTCGTCTCCGAGCCCTGTGTCGCGCCTTCGATCTCTTTGTACTGATAATTATTGATGAAGTTCGATAATTATTAGATCTGTGAGATCTCGCTCCGAGCGAGCTGTGCCTCGTTGAAGGCGAGGTAAGATGAAGCATGTAAGATCTCTTGTGTCGAGAGGGCAAGAAAAAAGATGAAAAAAGAG…	gz_contig_11377	100	377	gi|308080884|ref|NP_001182868.1|
aj_contig_229	CAGAATTCAGGTACCAACATAGCTCACAAAGCTCCTTTAGTTTTTCAGGTAGCGGACATAACAACACACACTGGAGTGCAGCTCGTCACTCGTCAAAATTACATAACAAAAGGGGAAAAAATCAAAATGCCTTGTATAGACAAAACGATCAGTCCAGCCAGGGGAATGGCAAGGGCAGATAACAAAAACTATTTTTATTGTGCTCTAAGACTATCAAAATGCACCAGTGAACTAGTAGCAGGACCAGACACGATAAACTTATTTGCTCGAACTTCTCCGTATCCAGGGTTTAGTACGGCTCTACCGGCGCCCTGAAGTTTGCTCCCGCGTAAACAGCGGCGTCACCGAGCTCTTCTTCGATCCTGAGCAGCTGGTTGTATTTGGCAAGACGCTCAGATC…	gz_contig_3962	100	1625	gi|115466256|ref|NP_001056727.1|
aj_contig_230	GGTCTTGTATATGTTGCTGAAGCTGGGTACATGCTCTCTCGGGCATCTGTTCCACGCCATTCTATCATTAAAAAACTTGCAGGAGAGAATATTGCACATTTAGATGACCTTATTGCAGTTCTTGCAAAATTGTCTAGGGGAGCACGAGTGCCTCTAGAATATGTGAAGTACACTGATCGTCACCGTAACAAGTCTGTACTGGTGACAATCGACCAGCATGAATGGTATGCACCTCCTCAGTTGTATATTCGAAACGATGCAACTGGTTTGTGGACTGCAAAATCAGCTATACCACCGGAATCTTCATTTGTAGCTTCAGCTTGCCATGCTAGTCATGTGCATACAAAGTCAAACTCTGTTGCATCTTTGTCTGAATCTAGTCCAGTGGATCTCAAGAGC…	gz_contig_2737	100	2330	gi|242062738|ref|XP_002452658.1|
aj_contig_232	CCGATAACACACGCTTCTCCCACATGGGAAATCAAAACAGTTGCTCTTCACTAGACTACCTTGCAGAGGGAACTTCCTCATTCGAATCAACAGGATCTTCCACGACATCTGCTTTGGAGCTCTTCTCCTCAGTGATGCAATCTGAGCTATCAGGGCCGGATGAGCCCTGGTAAGAGCTGGCCTGTTCAGGCTTGAACAGCTCATCATTCTCCAAATTGGACAACTTCTCAGCAGATTCTCCCTTCAGGAGCTCAACAACTTCTGACATTATCGGTCTCCGCTCTTTGTTATTCTGGGAACAAAGTAGCCCAACAAGCACCATTCTCTTCAGCTCATCCTCGACAAAACTATCTTTGAGTTTGGGGTCAGCTATTTCCTTGAATTTCTTGTCACGTGCAA…	gz_contig_17094	100	407	gi|115444683|ref|NP_001046121.1|
aj_contig_233	CCTTCGTCCCTGACCTCTCGTCGCGCGCTCTCCTCATCCTGCGGCGCCGCTGCTCCGCCCAACTGCTCAAGGCTCCAAGGAAAGATGGCGTCCCATATTGTTGGATACCCGCGCATGGGCCCCAAGAGGGAGCTCAAGTTTGCTTTGGAGTCTTTCTGGGATGGGAAGAGCAGCGCCGAGGATTTGGAGAAAGTTGCCACTGACCTCAGGGCTAGTATCTGGAAGCAAATGTCAGAAGCTGGGATCAAATACATTCCCAGCAACACCTTCTCATACTATGACCAGGTTCTTGACACGACAGCCATGCTTGGCGCTGTCCCAGAACGCTACTCCTGGACTGGAGGCGAGATTGGCTTGAGTACCTACTTCTCAATGGCTAGGGGAAACGCCACTGTCCCT…	gz_contig_620	99.5	2399	gi|226531522|ref|NP_001152513.1|
aj_contig_234	TATTTCCTTCCAAAGAAAAAGATACCTTCGTCCAACCATGTTATTGAAGCATTACCAGATGTGTCAGTGAACGTGTCTCTCGTACATCACAAGGATATGAACCATATTACAAGTTCACGGCACCATTCCAGCAACACTCGGGTGGCAAAAGCATACGTAGACATACTTGCCAGGTTAAAACACAAACGTTCTCTCTGGTCTCTGAAAGCGTCACCAAACATGTAAGCAGAATATTTACACACATCGCCGGATAAATAAAGCGAAGATAAAACGAAGCTCCCGGCGATGCGCCCGTCTCGCCACGAGGTTCTCGCTTAGGCCGACTCCGCGAAGCCAACCCTCAGCTTGCCGTAGTCGAACACGGTGTGGTAGGCTCCCATGAAAACATCGCCCAAAATC…	gz_contig_1008	100	1547	gi|357132502|ref|XP_003567869.1|
aj_contig_235	CTGCTACGTGCCTGCTGTCCCCATCGATCAACCTGTTCAATCGACCAAGCAATAGTAGAGAGAGGTGGCAATACTTCGGGTCTTCCGTAGTGTGTTTGTTCTTCTTCAGTAGAGGCAAGTGAATGTAGTGGTTGTTTTACTACTGTTTTGACTTGCTATTTTATCACATACATTTTAGTATAATGAATTATACAACCATAATTATTATTTATACGGTATATCATTCAATGTGATTCTTTTATTGTTGCTCCGTTGGATTCTCATTAGCATATTGGGAATGAAGTTGATGCAGTGGATACCTTATTATTATAAATTATAAGATGTGGCTGATATATACTTATTATAAATGAAGTTGATGTGGTGGATGCCTTCTCACCATGAGTGAAGTATATCATGATC…	gz_contig_8090	100	446	#N/A
aj_contig_237	TTCATCCATGCAAGCTCAAGAGCAACATCCGCACGAATCAAGTCATAACAAATGAAGAGGCAAGAAGCAAAACATTCTTTCTTTCCCTGCTCGATGAAGTAGACAAGCAAGTCCTCTGACAGCTCACGGTCACCAGACTGAGAGCATGTCTCCATGCAGTCCTTGTACATGTTGTCTTTCTTCGAAAGAGCGATGGATTGCTTCCATCTGCCTGCCTTCTTGTAAATGTAGGCTGCTATCCTCCTCATCTCAAGCAATTCATGCTTCTCAAGCTTCTGGGCAAGACCAATCTGATCAAAGTTATCATGCATATCAACTGATTCACGGAGTCTCTCATAGTCTTCCTCTTCAACATAAAGCTCATTCAAAGCTTCATTCACAGCAGCAACATTGTTACTC…	gz_contig_2921	98.67	3380	gi|122238868|sp|Q2QYW2.1|CLH2_ORYSJ
aj_contig_238	GACAGTGATACTCTGCGCTGGCAAAAAACAGCTCTACATCTGTTAGGGAAATCAATACAAAGTGATAGCAAGACAATGACTTGAATTGGAAATCAGAAACGACTGAAAACATGCTCCAAAATTCATCTGGTTTCGATCTATGCATATAGCTTCACTCCCGAGCCGTCGCACAACCCGAATCTCCAGTTATAACTCCCAAAAAATTGAATCGTCGAGCCCATTGATTCTTAGACTGAGTTCTGCTGCTTGTAGACAACCATGCACCACTACTCAACTTTGAAGCTGCTTGGTTCCTACGCATCATACTTGCATAGGTCTTCAAACCCCATGTACTCATGTTTCTCAATCTTGTGAATCATGTTTGAGATGCCAACCCCACCTAGAGAAATCGCACTGACA…	gz_contig_3345	98.72	1403	gi|218201973|gb|EEC84400.1|
aj_contig_239	TTAAATGACTTTTGTTGTACTTCGAGACGGCTAATTTACAAAAAGGCTCACTAACATAAACTATTAACAACCATGGTGAGTCACCTTTATCCCGATAAAAGAGGGAACAGGTGTCAACATGCAAATGTCGCTCATGAAAATCACAGCACAACAGAAAAGGGAAAAAAGGAACGCTTTTCCTCTAGGGCGGACATATACAACTTGAGAGGAAAATACTGACTGGCCAAATCACAAAACTGTGTTGATGTGCAATGCTTTCAACAATGAGGTGGCCATCTGTTTGACCAACACTTGTTGACCACCACGTTGCCCATCTCTTCGTTCTTCAATGAGGTTCTGTAGCTTTTGAGGAAGATCATTCTCTACTATGAGCTGCTTTGGCCGAGGGTGGTGCTCATA…	gz_contig_1938	100	2522	gi|242077508|ref|XP_002448690.1|
aj_contig_240	CCATTCTCCCTTCCCTGTCTAGAGACCTCAGTAAATTCTGCCATTAGTAAGTCAAGTTCACCATTTGTTTTCCTCTCTGTTGAAGAATGTAACAATGGCAAAATTGTTTCATGCTTTTCCAACCCAGACAAGTGGTGGACGTAATCGAGTTGGCCAGATACATGCCGCGACGGTGGTTCTTTCTCCAACAAACTCAATAGAGGACGGATTTGATCATTTTGACCGCTGTCATGACCATTTGATACTAGTTCGATATTCTTTGGCAATCGATCTGTAGATGGACTTCCTGCAGAGACACTAAGTCTCTGAGGTCTAATCAAGTCATTCTCTTTCCTCTCCAAGTTACCAGCAACAGTTTTATCACTGAACCTAAGAGATATGTTGTACTTATCTGCATCT…	gz_contig_4049	99.4	1997	gi|242077508|ref|XP_002448690.1|
aj_contig_241	CCAGCAGGGCCACCACCATGATGGAGCTCGAGATCGAGCTCAAGAAGGCCTCAGACAAGCTCAAGTCATGGGATGCAACTTCCATCTCCCTGTCTGCTGCTTGTGACTTGTTCATGCGGTTTGTAACAAGAACCTCACATCTGGAGCACGAGAAGTTTGACGCAGCAAAATCCCGCTTAATCGAGCGAGGAGAAAAATTTGGAGAGATATCCTTGAAGGCTCGTAAAACAATTGCAATGCTCAGTCAGGATTTCATTTCAGATGGATGTACCATGCTGGTGCATGGGTATTCTAGAGTGGTATTGGAAGTTCTAAAGTTAGCTGCATCAAACCACAAGCTCTTCCGGGTACTTTGCACAGAGGGCAGGCCAGACAGAACTGGTTTACGAATGTCAAATG…	gz_contig_7465	100	860	gi|77555797|gb|ABA98593.1|
aj_contig_242	GGTGATTTAGGAGCGAGATGGGGCCGGGCATGATAGAGCAGGATGGAGGGTAGGAAGAGGAAGGGAAGATTGAGGAATTCCATCAAGCGGATGGCGATGGAGTGCTTGTGCTCTGGTGAGCAGCTGAAGGGGGCAGATGAGACCGTCCGTTCATCAGACTCTACAATAACCAAAGATTTCTCAGCGAGCAGGTACTCTTCTCGGAATGGAGAAATTGAGCAGTACCTTGAGAACGGCAACATAGAGGAAGCTGAATTATCTCTGCGGGAGGGGGTTTGCCTAAACTACGAGGAAGCAAGGGCGTTGCTAGGAAGGCTAGAATATCAAAGGGGCCATGTAGAAGCGGCCCTTCGTGTCTTTGACGGGATAGACATATCTGCATTAGTTCCTAAAATGAAA…	gz_contig_10710	99.38	2402	gi|414871114|tpg|DAA49671.1|
aj_contig_243	CACACCCACGAGCAGCTCCCCACCACCGACTACTAGGCTCGTCGCCGCGCGCGTGCAGCAGCAGCCGGTTCCTCCGTCGACCATTTGATGATGATCAGTTCCCCTCTCGTCGATCGCCGTTTAGTTTCTTCCTCTCATCGGCCACCACCGTCTAGTGTATGAAGCCAGCAACTCCGCGGCTGCGTCCTCTCGTGGAATTTGCAAGTTGAAAACTCTGTACCCGTGATGAACTCCGACCGGACTCGTTTGCTTCTGTAAAATTTGTGAGTTTATTTCGCAGAATCCATCCC	gz_contig_9006	100	251	#N/A
aj_contig_244	AGACTCGGCACATTCTGCAACAAATACAATAGAGAGTACAGGTACAGCTTCATCACGGGTGTTCGCCTTATTTCTCGTGATGTCAGGATAGTATGTAACGTATGTCCCTCTACACAAGGCGTATGCGTGCACATCAAAACCAATTATGAGATCCTCGTAGCGATGCGTCGCTGTCTCGGAAGCATAGCAATACCTTACTATACACAATTCTGATGCACCAGCTATCAGCCTTATTACTATATCTCACCATTCGAGGATGACGATGCAGATTGCTCGAAAGAGTTCGCGGCACGGTGACTGACAACTGTTGGTAGTGGTGGCCTGTTGGCCAACCTGTCGGCCTCGCTCGCTTCATCGATGTCCTTCTGACTCAAGAAGCTTGGCTGGTTGGTTGATGAC…	gz_contig_6456	99.5	1799	gi|242088555|ref|XP_002440110.1|
aj_contig_245	GCCGTGCGATCCACGGCGCTCCACCACTTACCCGAGGTCGCCGTCCTCCTCGAACCCAACGCGAGACGGCCTTTATTAATCGATCCAGTGAGGTGTTGCGGCGATTTTTCGTTTTGAGCCGGCCGGGGGGANNNNNNNNNNNNNNNNNNNNNNNNNNNNNNNNNNNNNNNNNNNNNNNNNNNNNNNNNNNNNNNNNNNNNNNNNNNNNNNNNNNNNNNNNNNNNNNNNNNNNNNNNNNNNNNNNNNNNNNNNNNNNNNNNNNNNNNNNNNNNNNNNNNNNNNNNNNNNNNNNNNNNNCCGGGGGGATTGAACGTGCTGTAAGAGTGTTTGGTTTGATCCGGAAAAGTTGGTGTGGCTGGTTGGTCAGAGGAAAGAAGCCATGATACCTTCGGTGAGGCT…	gz_contig_2502	99.67	902	gi|413916972|gb|AFW56904.1|
aj_contig_246	GGCGCTTGTAATCTACCTGCACTACTTTGGGAGGGCCCTGAATCTGCTCGACTCTGAGCGCGTTGGGTCCTCTCTCAACGGACGCAGCGATGAGCTGCTCCACCAGTTTAAGGAGCATGCTCTGTATATCGTCTATATAGCTGCTGGTGTTTTTGTTGCTGGATGGATAGAGGTATCGTGCTGGATTTTTACTGGGGAACGGCAGACAGCTGTCATTAGATCAAAGTATGTTCAGGTCTTGTTAAATCAAGAAATGAGCTTCTTTGATACGTACGGAAACAATGGTGACATAGTTAGCCAAGTGCTCAGTGATGTCTTGCTAATTCAGTCAGCTATAAGCGAGAAAGTGGGGAACTACATACACAATATGGCTACATTTGTTGGTGGTCTCATTGTCGG…	gz_contig_8635	100	2657	gi|242036113|ref|XP_002465451.1|
aj_contig_247	CTCCAGTTCAACATGGTGGTAATTGTCAATTTGTTACAGTGCGCAACAAAAGAAAAACACAATCATGGTACAATCAAAAAATTCATTCAGCTTCAACAGATCACAAATAACTATTAACCTCGAGAGTCTGTAACCTTGTCAGCTTAATTTTGATAATCTAGTGTACGCATGTTACAAGGTGATACAAAAAAGAAAGCACCAAACAGCCTCAGCTTACAGCAACAGCTTGCACATTGTTCCAACGGTGCTTCCCCTGCATATCACTTAACCAGAAGGTGGTGGCGGCGGCGGTGGCATTGACATAGGAGGTGGAGGCATTCCGCTACCTTGTTGGGGTGGTGGTGGTGGCATCCACATATGTTGAGTTGGCATACTGGTTGGAGGTGGTGGTGGCCTTAC…	gz_contig_11131	99.69	977	gi|242039481|ref|XP_002467135.1|
aj_contig_248	AGGATGCAGGGTTTTACATGGATAAAGGGAAGAACACAATAATTATTCCAGAGTCAGGCTAGCTACCTAAGTAACACAGTTATCAAACGCGCAGCTATTGTACATGACCAGTAACTAGACTAAAAGTCACTAACAAGTCAAGCACAACTAGGTGTATATGGCTATGAATTGGTTAACAAACTTGTACAGCCCAAGTTACTCAATTGACAGGACCAAACCCCCCATGCAGCAAGGTTAGAATGGAATGGTCCTCTGATCTACACTGATACATCAAGAGACTGGTCTGATCACAGCAGATCTGGTTGGTTCAATTACTTTTCTTCGCCTCCTTTGGGATCATCCTTTAAATTCTCTGCCTTACCATTGCCTTCTGTTTCATCTTCCGAGTTATCATCACCA…	gz_contig_8523	99.75	1178	gi|414878929|tpg|DAA56060.1|
aj_contig_249	CCGAGTTTTTACATGCAAAGGAATTATAACATCTTACAGACAACACCCAACATGCGAGGACCTTCCAATACTATCCCTTACAATTGGAATCAAATGGCATAAAGGCGATAGAAACCTACGCCTGAAGCTCTCAGCTGCTCGACAACAAACTATCGAAACTGCTTCAAGAGACTAATTTCAATTCCATATATAAGGACTCATTGGGTTAAAGATGCGATGTAATTTGTTGCTACAATGAAACTTCATGTGCAAATGTGGAAGGGCCTCATAAAGTTTGTAGTTTCTAGTTTAATGTCCTTTGAAGGCTGGGTAGACTAACAATCAGTAACTGTCTTCATCCGTCTCAGGCCTTCGCAAGTAATAACGCAGAGAATTGGTCAGCACCTGAGATAAGGTGCT…	gz_contig_9174	100	557	gi|115487380|ref|NP_001066177.1|
aj_contig_250	CAAACACCAAATGAATTGCCAAGTGTGTAGTTCTCTCTGGCACCAAACCAGATCAGAATATTTGAATATACAATATAGCACAGAACTGGACAAAATAAACCAGCGCTACATGAAAATGTGTATCCAAGTATTACTATAAACCCATCATTCAGAAAGTTTTTTAAACCAGAAAACATTGTTGTTTTGTTTTGCACTAGAAGTTCAGTGATTTATTTTACAAACCACAAAGATAACTTTGTATAGTCATTAGCAGGTAATACCAATATAAATGGGGGAAATTTTGCAGCTCCAATGCTTCAGTTCCTAGGCAGAAGGGGCGTCTGGCTGCCTCTCAGGGAGCGCCGCTTGGAATGCTGGGTGTGCCATGTACTCGGCATTGAGCCTGGCAAGAGTCGGGTA…	gz_contig_12044	100	929	gi|242065462|ref|XP_002454020.1|
aj_contig_251	CCCTCACGGAGTCCACCTTCGAGAAGGAGGTCGGCCAGGACCGCGGCGCCCTCGTCGAGTTCTACGCACCCTGGTGTGGTCACTGCAAGAAGCTTGCCCCTGAGTATGAACGGCTTGGTGCAAGTTTTAAGAAAGCTAAATCTGTCTTGATTGCGAAGGTTGACTGTGATGAGCATAAGAGTGTGTGCAGCAAGTATGGAGTATCTGGTTATCCAACAATCCAGTGGTTCCCTAAAGGATCCTTGGAGCCCAAAAAGTATGAAGGACAGCGAACTGCCGAAGCCCTTGCTGAATTTGTCAATACTGAAGGAGGCACCAATGTGAAGCTGGCTACTGTTCCTTCAAGCCTTGTTGTACTCACTCCTGAGACTTTTGACTCAGTTGTCCTTGATGAATCGA…	gz_contig_3475	98.54	1235	gi|242052897|ref|XP_002455594.1|
aj_contig_252	CCCGCAGCCTCGTCACACCAAGGAGAGGAAGGAAGGAGCAGCATGGCGACGTCCGTGGCCGCCGCCGCGAGCACGTTCCTCGGGACCCGCCTGGCGAACCCGGTGCCGCAGAACGGGCGCATCATGGCGCGGTTCGGGTTCGGCAAGAAGAAGCAGGCGGCCCCGAAGAAGGCGGCGAAGACGACGTCGTCCGACCGGCCGCTGTGGTTCCCCGGCGCGGTGGCGCCGGACTACCTCGACGGGTCCTTAGTCGGCGACTACGGTTTCGACCCGCTCGGGCTCGGGAAGCCCGTGGAGTACCTGCAGTTCGACCTGGACTCGCTTGACCAGAACCTGGCCAAGAACCTGGCCGGAGAGGTCATCGGAACCCGGTTCGAGAGCTCCGACGTGAAGTCCACC…	gz_contig_6038	99.43	1046	gi|162458005|ref|NP_001105502.1|
aj_contig_253	CTCCTCTGGGTCCTCCCCGGCGACCCTCTCTCCCCACCCGAGGACTCCAAGGAATCCGAAGCCCGCCCTCCGAGGGGCTTCTGATCGATTATCAGACTCATGTTGATGATGGTCCCTGATCTTAGTTTCTCGGCATCTATCTCTAGTGTGAAGCTCCCAAGGTACGGGGCATCAAAGAATGATATGTTCTTAGTTAAGAGGTCCCCAACATTCCGTGCAGAAGTTAGGCCAGTGAAATCCGATAAATATGGTTCTAATGGCCGCGCAACAAAGATGGTCCCAACAACTGAGTTGAAGAGGAGCAATGGTGTTGGCCTTGTAAGACCAGCGACAGTGAATGGGTCTCCAAATGGTGCTGTTAACGGCTCGACCAAGGCACCCGANNNNNNNNNNNNNNNN…	gz_contig_8435	98.74	2144	gi|242034913|ref|XP_002464851.1|
aj_contig_254	GCGGCATACGCGCTGCTCGCATTCATGAACAAACTGAGAGCAAAAATAATTATTGGTACCAACACAGAGGACTAGTAACAAATTCATGCGATAATATACATACGCAATTGCACTAACTGTCCAAAATATCAACAACCGTTCACCATCAGATACATCACCAGCGTGGCAGAAGCGACGAACATGCTGAGTATAGATTACAGACGAAGCTCAAGAACAGCGCTCAGAAGAAGTTGGGGTCGTATCCGTTGCTGGACGTGGCGAGGATGTAGTACGCGACGATGTGGCCGAGCGAGCCCCAGGCGAGGACGTCGACGAGGTTGAAGCCGACGGGGTCGTTGGACTTGAGCAGCCCGGCGTACTCCTTGGCGCGCACGTCGCCGGCCTCGAAGTGCGTCTTGC…	gz_contig_9390	98.87	530	gi|226502937|ref|NP_001151214.1|
aj_contig_255	GCGTCACCAAGCAAATGGCAATCAGAGATTGAATAAAGAGAGGAGCAGAGCACCAAACCGAAACCAAACCAAACTCAGGACGAGACACATCAGCTTTTCGATCGTCTGCTCCACAGGCTAGGCAAGAAGACTCGCAAGATCTTGCACAGCTGTTGGGTGCGTGTAACGAATTAGCCACTAGCATCAGCAGCAGAGGAGCAAGCTGATTACCAAGAGAGCAAGCAACACATACTGCATAGCAACAGCAACAGCAACAGCAACAGCTGCAGCAAGAAGAAGAAGAGGAGGAAGGATGTCTGACTGGGGCCCTGTTGTGATCGGCGTGGTGCTGTTCGTGCTCCTCTCGCCGGGGCTGCTCGTCCAGCTCCCGGGCCGCCACCACTTCATCGAGTTCGGCAA…	gz_contig_7589	100	791	gi|115461589|ref|NP_001054394.1|
aj_contig_256	AACCTAGCCGCGTTCGTGTCCTCGTCCTCTTCTTCCTCACCGTTAGGGAGAAGGAGAACGCGCCGCGTTTCTTCCCCTGCTATTACGCGTCGCCGCTAATCCAGAAGAAAACCTAAACTACTTTCCTCCATGTTCATGTCGATCCGTGTAGCCTGTGAATTGAAATCGAGGGACGGTAATTCTATCTTGTATTTTGTTGGAAAACTTTGTTTGTTTGGTTACTTTGCAGGAGATCTGATAGCGGGTGGGACGTGATGTTCGGACGGCGACGGATCCTGCACCTCTCGGCGGATCAAGGATGTTCTCGGCGGATTCCAGGCGCCAGGATTGCGTTGGAGCGTGAGCGGGCGGATTCATCCCGGAGCTTCTGCGTCGCGCCTTCTTCGATCTCTTTGTACT…	gz_contig_3335	100	1757	gi|293335091|ref|NP_001168220.1|
aj_contig_257	GTCGGGGTCACCCTCGGCCCAAGAGGAAGGAATGTTGTCCTGGATGAGTTTGGTACTCCAAAAGTGGTAAATGATGGAGTTACCATCGCTCGTGCTATCGAGCTCGCTGATCCTATGGAGAATGCTGGTGCTGCATTGATTCGTGAAGTTGCAAGCAAGACAAATGACTCCGCTGGTGATGGCACCACAACCGCATCTGTTCTTGCTAGGGAGATTATAAAATTGGGTATGCTGAGTGTTACTTCAGGTGCAAATCCAGTGTCTATTAAGAAGGGCATCGATAAGACTGTTCAAAAATTAGTAGAGGAGCTTGAGAAGAAGTCGAGGCCTGTCAAGGGTGGCGGGGACATTAAAGCTGTTGCTGCTATATCAGCTGGAAATGATGATTTTATCGGGACC…	gz_contig_2005	100	1487	gi|242032147|ref|XP_002463468.1|
aj_contig_258	TCTGGATATGTTGTTATTGTGAATATTCATGAGTACATGTACGACGTGCAGTTACATTACAAAATGACATGGGAACATGTTATTCACGATGAACAGAACAAATAACGGATGGCAGCATATGCCGCTGAGATCTACTGGAAAGAGAGTTCTAATGAAAACGTTATGTACACTCAAAATTAATTATACACTGAATCAAAGATGGAGTATCTCTTCCACATTTGTACCAGTTGTCGATCAAACCGAGTTGAGGTCTTGCGACACTTGGTTTTGCCACCTTGTAAGAAGGAACCTCGCCAGCGGGCTTACTGTTGGAGCTGCCAACGGTGGCGTGTTATCAGCTTTTTTGTTGCTTGCTGGTTCTACGGGAGGATCAGATTTCTTAGAAAAAACTGAAGCTGC…	gz_contig_12060	100	1580	gi|242050330|ref|XP_002462909.1|
aj_contig_259	AGGTGAGACCGGCGACTTTCCCGCTGTGCAGACGGTGACTTACCGGGAGCTGTATCGCTTACCACATTTGGTACCAAAATAGGGAGCTGTATCCAGGCCAACAAGCTGTACATCGGCTGAAGTAATTTGTGGATCGTAGGATGAATTCTAAGAATAGAGGTAGCATACAGAAGGCAGGAAAAGCTAATCAGATCCAAGGAGGCGGACCAAACTGGGTTCTTCTTGCGGGTGGTGTTTTGCTTAGCACTCTTTCAGTCAGACTTGGGTGTAAACTGAGGCAACTGTTTGTTACGAAGCAGCAAAATACCGTTTCCAAAGCCAAACGAAGACATGGAGCATGTGAACTGCACTCTGATCTCTACAGGTTTAGTGACCAAACCATATGCTATTGTTGTATGC…	gz_contig_8675	100	722	gi|326505798|dbj|BAJ91138.1|
aj_contig_260	CCGCCCGCGTACGCCAGGATCAAGAAACACCGCCACCGCGTCTCCCAGAGAAGCACACGCCCGCGCCATGGCCACCTCGACCGCCTCTGTGCTGTCCCCGCCGTCCGTGGCCGGCCTCCGCTTGGCGCCGTCCCCGAGGGCGCGCTCCTCGGTGTCGTTCCGCGCCGCGCCGGCGAGGNNNNNNNNNNNNNNNNNNNNNNNNNNNNNNNNNNNNNNNNNNNNNNNNNNNNNNNNNNNNNNNNNNNNNNNNNNNNACGATCAAGAAACTCCGCCGACCACAGCGTCCTGCTCTCGAGACCACGCCCGCCCGCGCCATGGCCACCTCGACCGCCACCGTGCTGTCCCCGCCGTCCGTGGCCGGCCTCCGCCTGGCGCCGTCCCCGAGGGCGCGCTCCTCGG…	gz_contig_9746	100	653	gi|242045112|ref|XP_002460427.1|
aj_contig_261	CCTGCAACGAGTGCGCCTTCCCCGTCTGCCGGGACTGCTACGAGTATGAGCGCCGGGAGGGCACGCAGAACTGCCCCCAGTGCAAGACTCGGTACAAGCGCCTCAAGGGTTGCGCGCGCGTGCCTGGAGATGAGGAAGAAGATGGAGTTGACGACCTGGAGAACGAGTTTGACTGGATGGACAGGCATGACACCCAGTCTGTTGCTGAGTCCATGCTTCATGGCCACATGAGCTATGGCCGTGGTGGTGACATGCCTTTCCAGCCCAATCCTAGTGTTCCTCTCCTCACAGACGGGCAGATGGTTGACGATATCCCCCCAGAGCAACATGCACTTGTGCCATCTTTCATGGGCAGCGGAGGAAAGAGAATCCACCCACTTCCATATGCGGATTCCAATT…	gz_contig_1287	100	2501	gi|115456459|ref|NP_001051830.1|
aj_contig_264	TGCGGGGCGTCGACGTTCTGACAAAGGAAAATATCGCTGAACCAATTCGTGATATTAGACGAGCACTTCTGGAAGCAGATGTTAGTTTGCCGGTTGTGAGACGATTTGTGTCTTCTATTAGTGAGAAGGCTCTAGGTGCAGGTACCATCAAAGGAGTCCGACCGGACCAGCAATTAGTGAAGATTGTGCATGATGAACTTGTACAGCTGATGGGTGGAGAAGTATCAGATCTGGTATTTGCAAAAAGTGGCCCGACCGTTATTTTACTGGCAGGTCTACAAGGTGTTGGGAAGACTACTGTTTGTGCAAAGCTTGCATTCTATTTGAAGAAACTGGGGAAGAGCTGTATGCTGGTTGCTGCAGACGTTTACAGGCCTGCTGCCATAGATCAACTCACTA…	gz_contig_1251	99.26	1622	gi|413924904|gb|AFW64836.1|
aj_contig_265	AGGTATTGCTTAGCGATGTATAATACACAAGAGAATGGCATGATGCGGCATTGTTCTGACAGTCACGGAAAGATTTGCAGTGATCAACCCAAAAGGAATATCCTTGTGTATCTTTATGGACTGCAAAGGATCCAACATAAGAATGTGCTTCAAGTGATAACCGTAGAGAAGAATCACACCAGTCGCCAACAGTGTCAAACAGGCAGATCTTTAGAAATTCTAAATTCTTCATTTCAGCATTGATTTTTAAAATAGGGAAACCATTCAGTTCCTGGCAATTGCTCTCTAGGCAATACTAACCACTGCCAAATTGGATTGCAGAAGCTGCTTATCAAAACTGCCTTCCACTGCCTCCTAGTGTGCGTAGCCAGCATCTGTATCATCTCCTTCCGAACACAA…	gz_contig_8207	100	992	gi|259489850|ref|NP_001159246.1|
aj_contig_266	TGGGTTTAGTTAAATGTCTTTGACCAATAATTTATTGTCCACACGTCACCAACGTTTGTGACCCTTCAAGTTTGCACTAGTAAACTAGGCTACAAAAGGAAACGCATACAGTAGTACATGGCTCCTGAGTATATTGTGGTAATAAGTTAGGCTAAAAATGAAAAAAGAAGCTCGGGTAGCGAATTTCATTGTCTCCAGATCGGCATACTGGGGCCGGTGGATCGACAACGGTNNNNNNNNNNNNNNNNNNNNNNNNNNNNNNNNNNNNNNNNNNNNNNNNNNNNNNNNNNNNNNNNNNNNNNNNNNNNNNNNNNNNNNNNNNNNNNNNNNNNNNNNNNNNNNNNNNNNCCCCGTCCCCGGTGCCTTCTTTGTCAACTTCGGTCACCAACTCGAGATCGC…	gz_contig_166	99.79	2834	gi|242063742|ref|XP_002453160.1|
aj_contig_267	CCCACCCGCCTCGAACTCAAGCCAAACCCTAGCCTCGAGCCGCCCCTCCGTCCACCGCGTTCTTGGCGAGGGAGGATGTCCAGCAGGCGCTGGAGCAGGACCATCTATGTCGGGAACCTCCCCGGCGACATCCGGGAGAGGGAGGTCGAGGATCTCTTCTACAAGTATGGGAAAATTGTTGACATTGACTTGAAGATTCCCCCAAGGCCCCCTGGTTATGCCTTTGTTGAGTTTGAAGATCCTCGTGATGCTGAAGATGCAGTTGCTGGACGGGATGGCTACAACTTTGATGGACACCGCCTAAGAGTGGAACCTGCACATGGTGGGAGAGGTAATGCTCCCTCAAATGACCGTTCAAGTGGCTTTGGTGGTGGAGCACGTCGTGGTGTTTCTAGGCAC…	gz_contig_206	100	494	gi|413955773|gb|AFW88422.1|
aj_contig_268	TCGGACGCCCTCGTCGAGATCAAACCCGGGGAGATCGGGATGGTCTCCGGCATCCCAGAGGAGCACCTCCGCCGCAGGGTTGTAATTTATTCACCAGCTAGGACTGCGTCCCAGCAAGGTTCAGGCAAAGTCGGGCGGTGGAAAATCAACTTTGTGTCAACCCAAAAGTGGGAGAACCCATTAATGGGATGGACATCTACTGGAGATCCTTACGCTAATGTTGGTGAAGCGGGGCTTACATTTGATAGTGCAGAATCAGCAAAAGAATTTGCTGAAAAACATGGATGGAACTACGTGGTTCGCAAACGTCATACACCTTTTTTGAAGCCCAAGGCTTATGCGGAGAACTTCAAGTGGAGAGGCCCCACGAAGACGGAGCTTGCCTGATCCGACGGTCAG…	gz_contig_10719	100	494	gi|242050704|ref|XP_002463096.1|
aj_contig_269	CGGGGAACGGTATTGCCGCCCTGAAGCTATCTGACCGCACCTGCACAGGGGTTCTCGCTTCTCACCCGCTCTCCCGCGACATCCACATAGAGTCACTTTCGTTAACATTTCATGGACATGACCTTATTGTGGATTCTGAACTGGAACTGAATTATGGAAGGCGATACGGTTTGCTTGGATTGAATGGCTGTGGAAAATCTACCCTTCTCACAGCAATAGGCTGTAGAGAGCTTCCGATCCCTGAACACATGGACATATACCATCTCAGTCATGAGATCGAAGCTTCAGACATGTCTGCATTACAAGCTGTGGTTTGTTGTGATGAAGAAAGAGTAAAGCTGGAAAAGGAAGCTGAAATTTTGTCTACACAGGATGATGGTGGTGGTGAAGCTTTGGATC…	gz_contig_9210	100	1418	gi|242083378|ref|XP_002442114.1|
aj_contig_270	CCGGCCTCGAGTCTGCATGGAACAAGCTGCGGGGAGTCGACGTATTGACAAAGGAAAACATAGCTGAACCAATGCGTGATATCAGAAGAGCACTTTTGGAGGCAGATGTAAGTTTGCCTGTAGTACGGAGATTTATCGAGTCTGTAACTGAAAAGGCTGTAGGCACGGATGTGATTCGAGGCGTCAAACCTGATCAGCAGCTTGTGAAGGCTGTAAATGACGAACTTGTACAATTAATGGGTGGAGAGGTATCAGATTTGGTATTTGCAAAATCTGGCCCAACAGTTATCTTGCTAGCAGGTCTGCAAGGTGTTGGGAAGACAACTGTCTGTGCAAAGCTTGCTTACTATCTAAAGAAGATGGGGAAGAGTTGTATGCTGGTTGCTGCAGATGTTTACA…	gz_contig_10777	100	1124	gi|242084798|ref|XP_002442824.1|
aj_contig_271	GCCTCTTCGCCAAGAAGGAGATGAGGATTCTGATGGTTGGGCTCGATGCCGCCGGTAAGACCACCATCCTCTACAAGCTTAAGCTTGGAGAGATCGTCACCACCATCCCCACTATCGGATTCAACGTTGAAACTGTCGAGTACAAGAATATTAGCTTCACTGTTTGGGATGTCGGGGGCCAGGACAAGATCAGGCCCCTGTGGAGGCACTACTTCCAGAACACGCAGGGACTCATTTTTGTTGTGGACAGCAATGACAGGGAACGTGTTGTTGAGGCCAGAGATGAGCTCCACAGGATGCTGAATGAGGATGAGTTGCGTGATGCTGTGCTGCTTGTGTTTGCAAACAAACAAGATCTTCCTAATGCCATGAATGCTGCTGAAATTACTGACAAGCTTG…	gz_contig_8461	100	623	gi|413945813|gb|AFW78462.1|
aj_contig_272	GTTGCGGTGATTCGATTTTGAGCCGGCCGGGACGGATTGATCCTGCTGTGTTTGGTTCGGTTTGATCCGGGAAAGTTGCTGTCGCTGGTTTGTTGGTGGAAGGGAAGAAACCATGATGATACCTTCAGTGAGCCTCTCTCCTGCCCCTGTGGCCTTTGCTGGCTCCAGCCTACGCTTGAAATCCGCTTCAATACCTTCTGCCTCCAGTATCAAACCCTCCAAATATGTGGTCTCCTCCCTCAGGCCACTCTACCTTGCACCACTTGATGGTCCACGTAGTGCTGAGTTGAAGCATCGGAGGCAGCCGCTGGAGTTCCGTTGTGCAGCTTCTGCTGCTGACGACAAAGAGTCTAAGGCTGAGGTGGTGCCCGTCCGCTCTGAAGCTGCACAGAGAGTAAA…	gz_contig_833	99.05	1586	gi|242078395|ref|XP_002443966.1|
aj_contig_273	CCGTAAGATCGTGCCCGGCTGGGACGACGCTCCCAGCGACGTGCGCCAGGCTTATAAGCAATTCATCGGGGCTGTGGTTGAGTTGTTGAATGGGGAGGCAGTATCTGAAGAACTCCAGCAAGTTGCTCAGGCTGCGTATGCCATGTTTGGTGGAGATGAGGCAGAGTATGATGCCGCCAAAACAGTTGTCAGGAAAAGGAATGAATTGGAGAGTGTTGTGGGCTACACTATACAAGACTCAATTTTAAATAAGGTAGCCCAACTAGCTCAGAAACTTGGTTCCCTTCAACGGGCAAGCACCCATGAATTTTTTCATGGAAAAGCAGAGGCTGCAGAGGAAAATGGCAGAAGTGAATTTGGAGCAGACTTTGATTTCAAGCCACCTGCACGTTTCATTGT…	gz_contig_1021	99.86	6332	gi|242036511|ref|XP_002465650.1|
aj_contig_274	CCTCTAGTTACAAGGCTTCGGTAGCCGGTACAACACTATGAGGTATAAAAACGCATACTCCTTGCCACATTCCCTGCACAAATTCCTTCCAGATACAAGATCACCTAATTTCGTTCCCCATGTTTGCTCTATTCACCATAACAAATCCAGTGCGCGTCAAAACTGAGTTAATTTCCCACGAGATATTCATTGAGTAGATATAGCACGACTACCTCTCTATAGCCCCGAAGAAACATCAAGTTTCATGATATATTGCAGCATACCTTGGGCCCCTAATTATGTACAGACCCTCATGTCTTCCAAGTTACGAATATTACTGTATCCAAACCCCAGTCTCAAGCAAACCGTTGAAACTCATAATCAGCATTTTAGGTTGACTGAATAGTTGCTTGTATCTTA…	gz_contig_968	98.26	3095	gi|242091417|ref|XP_002441541.1|
aj_contig_275	GAAAAAACAACGCATAGTTCCTCTATAGCGGATCAGAAATTATCTGATCGCTCGAACAAATGACAACGCATGGAACAATCCTAAGGAAACGAGTGTTGTAACTTAAACTACATCCAGTTGATTTCATATGTACCATCGAGATGAGAGGGTGCCAGCGCGGTATATTAGCCACGTCAACCGCTTCCAAGTTCCAACATCCTCTCGAGACAAACCGGCCCAGCAGCAGGCACTGTGATGCTAACCTAGACAATGGACTACAGCTGGTCCGTCTTCCATGTAATGTACACCAGTACACGGCTGGTTCTTCTCATCCTTTCATTTGTGAAGGATGAAGAGAGAACATAAGATCTTCAATCAGGCACCACTTATGGACAATTTACTGGACATAAGGCTTATCAA…	gz_contig_8709	99.84	1919	gi|413953078|gb|AFW85727.1|
aj_contig_276	CCGAAACCTTTTATTTATAGGTATACATACTGATACACAAGTCTTGAATTTGTGTGCTCATGGCTCAAAATATAAGCCTCGCAGTCTGTTTCCATGTTCGAAACGGGCACATCAAATTTCTAAACATCAAGCGACCACATTGAATTACGCCATGAAGTACGCAAGCAATCTAAGCCGTAGCCATTACCCAAGTGAAGCCAACTTCTTCTCTAGTCGCTTTGCCGAACGAAGGGCCTCCAGAGCCTCCCCATGCTTTCCTTCCCGTTTCAATGTGAGAGCCTTCAGTTTCTCAGCCTTGATCTGTTCTTCGAGCTGAGTTCTCTCGCTCTTAGGCTTGCTAGTCGCCACAGCTGGCTTTGCTTCTGCTTGAGGCCTGTTTGTCAATGTGACGGCAGGCTT…	gz_contig_9518	99.84	1889	gi|242062140|ref|XP_002452359.1|
aj_contig_278	CAGTCAGTCAACAGCTCCTGCAGCCATGGGGAAGGAGAAGGTTCACATCAACATCGTGGTCATCGGCCATGTTGACTCTGGCAAATCCACCACCACAGGTCACCTTATCTACAAGCTTGGAGGCATCGACAAGCGTGTCATCGAGAGGTTCGAGAAGGAGGCCGCAGAGATGAACAAGAGGTCCTTCAAATACGCCTGGGTGCTTGACAAGCTCAAGGCTGAGCGCGAGAGGGGTATCACGATTGACATCGCCCTCTGGAAATTTGAGACCAACAAGTACTACTGCACTGTCATTGATGCTCCTGGGCACCGTGACTTCATCAAGAACATGATCACCGGGACCTCCCAGGCTGATTGCGCTGTGCTTATCATCGACTCCACCACTGGAGGCTTTGAGGC…	gz_contig_580	99.8	1487	gi|242045976|ref|XP_002460859.1|
aj_contig_279	CCAATTCATAGGGAGAGACGGGGAGCCCACCGGCACAACGGTGGCCCGGATTTTCGATTAACTCCACATCTGGCAAGTAGTTTGTCGGGAACCGGAGTGTATTAACAAAGGGAAGAAGACTTGATGCCGGACATGGGCTTCCTCTCTAGGAGTACGCTGCTAGCTACTGGCTGATGGATTGAGCAACTGCCAGTTGATTCGATCGGTGCCGTTTCAACAACGTGTCCTTCAGATTCAGTTGCAGTTTCATCAACGGAGGAGCCAGGAATCTTTACCTCGACCAAGCTGCTCTGCA	gz_contig_22136	100	203	gi|256397310|ref|YP_003118874.1|
aj_contig_280	CCGCGTCCCTCCCAGGCACAGAGACAGGACAAAGTCAGAAGGGTCGATATGCTGCGCAGGTGGTTTTGCTGCACTCACTTTAACGCGTCATATCGTGAACATGAAAATGAACGCCCTGTCAGTCCGGAAGAAAAAGAAGGAAATGGTTTTGTTCCCAAAAGTGATCCCACAAAAGCACCTCCTATCATTGAAGTTCCTGAATTATCATTCGAAGAACTGAAAGAAAAGACTGACAATTTTGGATCAAAGGCTTTGGTTGGCGAAGGATCATATGGAAGAGTGTACTATGCTGTTTTAGACAGTGGAAAACATGTTGCTATTAAAAAGCTTGATGCTTCAACAGAACCTGAAAATGATAATGAGTTTTTGACGCAGGTATCTGTTGCCTCGAAATTAAAA…	gz_contig_4042	99.39	1472	gi|414886246|tpg|DAA62260.1|
aj_contig_281	CGGGCACAAATATTTCTAGATAATCAAACAGGTGTTGTACAACCCAGGGGAATATCAGACAAAGGTTCATATTACAATGCCGGGGTCATCGCAAAAACAAGCATTCTGCTCTCATTCATCTGCCAACCAGGATGCTGTGGCGCCAGCAACAAACTAGCTGCAGACGTACCAGAAGCTAAAAAACTGGTGTGACTAATACCAGGATCAAGAGAGTTTCATGCTCTTCAACATGCTGGTGATAAGTTGCACCTTTGATGGTGCCCGTTGCTTGTAATCCTTCAACAGTGCTTCTGCAGCCAAGCTCGGCAGTTCTGAGCTCTCTTCCTCCTTATTTCTTCCTTTGGTCAGCTGATTGATTGCCGCGCTACACAAACATACACCGAAGAGGGCTCTTGTGTT…	gz_contig_10463	100	749	gi|222622095|gb|EEE56227.1|
aj_contig_282	TGTGGACTCTAACAATAATACTGTAGTATATGCTGATCTTAACAAGTCACCTGAAAGTGACTTTGAATATTGTGAAAATCCTGATATCCTTGATTCAGATAAAGCATCTGATCACCATAGTGAGCGTATGGATGACTTGCAGACTATACAGATTGCTGCAGCAAGAGTAACAGAAGTTACTGAGCTGGAAGAAGCTCCTGGTCTCTCAGCATCAGCTTTGGATGAGGAACCAAATCCAATTACTCAAACAGCATTGTTCAGGGAGTTCTCAAACTCAGTCAAGCACAATGAAAGAACCATGCCTCCTATATCACAGGATGCATCAAATGCACCAGTTGGAAATGAATCGATGACAGTTCCACCTCGATACTTTGGTTCTATGCCACCCACCGCACCAAA…	gz_contig_13923	98.92	1112	gi|242064036|ref|XP_002453307.1|
aj_contig_283	TTTCATTATACCGCACATACCCGGATACCCTGAAGAGTAGCTATTCACCACAGCATGTATCCATGTCAGCTGAAGCAAGAAGTATAACGGGAGACCTATAACCATTTCTTCACAGTAACGAAGGTAAAAGCCAAAAAGCAGTTCAACCACCAAGAGAGCAGAACCGCCTGGNNNNNNNNNNNNNNNNNNNNNNNNNNNNNNNNNNNNNNNNNNNNNNNNNNNNNNNNNNNNNNNNNNNNNNNNNNNNNNNNNNNNNNNNNNNNNNNNNNNNNNNNNNNNNNNNNNNNNNNNNNNNNNNNNNNNNNNNNNNNNNNNNNNNNNNNNNNNNNNNNNNNNNNNNNNNNNNNNNNNNNNNNNNNNNNNNNNNNCCTGGTGAGCGCACGGGAGCAAGATCACACA…	gz_contig_11246	99.13	1028	gi|242044548|ref|XP_002460145.1|
aj_contig_284	CCTCCAGGAGTCTGGTTTCATTCATGCCGCATTTACTTTGGGATATGAAGCGGGGATCCACAAGGGCGGCATAGATGCCAATACAGTTCCACCAGGTGCTCTTATCACCGTTGTGCAGAAAGGCCTCCAGTACATAGAACTGGAGGCAAACACAGATGAGAATGATGAAGAGGTTGAGAATGATTTTGCGCTTCTGGAACCTCTTGAAATTATCACAAAAGATGTTGAAGAGTTGCAACAGATTGTGAAGAATAGGAAAAGAGAGAAGCTTCAAAATGACGAGGAGAAGGATAAGGAGAACAATAAGGATCGCAGTGACAAGGATGAACGACGTCCAGGAGGTGAACGGGAGAGAGATCGCCATGACAAAGAAAAAGAGCAAGAGAAAAACAGAGCTGA…	gz_contig_8363	100	1370	gi|115471661|ref|NP_001059429.1|
aj_contig_285	GTATATATAGGAGTATGTTTATATCGTGCAAACAAAAGCTCACACATCAGTAGCAAAAATTGTTACATATGAGCACTGGCACAACTGTTATCTTTGTTGCCATGGACACAACATTCAGTAGTTTACATAGGAAGGCGATTTATTCTTCTCGTACTGCTGTACACATGGACTTTCTAATATCTGGTTATTCTATTCAAAAGAGCCGTGCTCGACCTACACTTAGCCAACTGATCCCTCAAGTTTCAGGTTCATGAGCGCGTCCACCTCCTGCGCAAACTCGTAAGGAAGGTGCTCGAACACAGCTCTGCAGAACCCACCAATCATGGCAGCAACAGCCTTTTCATGATCTATCCCTCTTTGCTGGAAATAAAATAGCTGGTCCTCTCCGATTTTTGAAGT…	gz_contig_2865	99.79	1406	gi|242059125|ref|XP_002458708.1|
aj_contig_286	TTCACAGATGACAGTTTGCAGTATCAGCTACCACACATGTTTTGCACTTGATACAAGGAGTAACGTATAGCATACATTAGACACGTCCTGCAAAACTAAGTAGTATTACTCATGTCTGACCGTCACAAAGACAGCTTCCAAATGTATATATAGAGATGGGAGGAAGAGCATGACGACAAAAAATAAAACCAAATGACAGAGATCCGCAAGCCTGCACCGCAGGTATGTCATGAATCACAACCTAGATGTACAGAGCGTGGCACGGATGGTCCTGACTAGATTTCCCATTTCTTCAGTTCCATCCCATCAGGAGGGCTCCCTTCAACCTTCTTCGAGCCAACATCCTTCCAGTTGGTTGAGAGAACTGTGCCGTTCGATTCAACGAATGACTTCATCATA…	gz_contig_4260	99.75	1181	gi|242053671|ref|XP_002455981.1|
aj_contig_287	CCCGCAGCCGTCGCGGAGGGGCAGGGACGATCGGGATGATGGGGACGAAGACGATGATGACGAGGAGGAAGATGAGGGGGAGAATGAATATGAGAAGGATGGCTTCATAGTGGATGACGCAGATGAGGAGGAGGAGGAAGGTGAGGAAGAGGAGCAAAACGATGAGAGGCGTAAGAAGAAAAAGAAAAAGAAACGGGAACAAGAAGAGTTCATGCTTGATGAGGATGATTACATGTTGCTCCAAGATAATAACATCACTGGAATCAGTCGGCCAAAGCTTGGAAACAAGTTTAAGCGCTTGAAGAAGGCAGGGAGGGAATCTGAAATGGATGATCGCTCTGGTTTCTCAGATGATGATGGAACAGGGAAAAAGCGTACTGGCAAGGAAAGAGTTGAATA…	gz_contig_2104	100	2261	gi|242088343|ref|XP_002440004.1|
aj_contig_288	CCGACGTCGATGTCGGGACGGAGCTCCGGCTCGGGCTGCCGGGAGGCGGCGCCGAGACGGCCAAGGCCGGGAAGAGGGGCTTCGAGGACACCATCGACCTCAAGCTGAAGCTGCCCACGGCCGGCATGGAGGAAGCCGCCGCCGTTGTCAAGCAGGAGCCGGCCGCCGAGAAGACCAAGAGGCCAGCGGAGGCTCCGGCCGCTGATGCCGAGAAGCCACCGGCACCCAAGGCACAAGCTGTGGGTTGGCCACCAGTCCGATCATACCGCAGGAATGTCATGACCGTCCAGTCTGTGAAGACCAAGAAGGAAGAGGAACCTCAGAAGCAGCAGCCTCCTGCTGCGAACACGAGCAGCAACAGCTCCGCCTTCGTGAAAGTCAGCATGGACGGTGCGCCCT…	gz_contig_1855	99.47	560	gi|242033007|ref|XP_002463898.1|
aj_contig_289	TGCGTCTGCAATTGGGCAATGGAGGAGAACACACACAAGAAAGAAACCTTGAGATGAGTCACACCTGGAACGAAGAGTAAATGCCATTCTGGAATGATTCAGATCACGTGGGAACGCTTGTTTTGCAGGTGAAAAAAGCAGACTTGGATGCAACATCAACNNNNNNNNNNNNNNNNNNNNNNNNNNNNNNNNNNNNNNNNNNNNNNNNNNNNNNNNNNNNNNNNNNNNNNNNNNNNNNNNNNNNNNNNNNNNNNNNNNNNNNNNNNNNNNNNNNNNNNNNNNNNNNNNNNNNNNNNNNNNNNNNNNNNNNNNNNNNNNNNNNNNNNNNNNNNNNNNNNNNNNNNNNNCCCATACTCTTTTTCCTGCCTTTACACATGTCAAACAGTAGTAGTTCATGCG…	gz_contig_3352	99.68	1898	gi|242063572|ref|XP_002453075.1|
aj_contig_290	CCGTACACACATTTCTTTCCTCCCTGATTACCGCCTCAACGCACGAACCCAAACCACAAATTTGCTTCCTCTTCCCCAATAGCGTCAGCGCCCACGGTTTTCTTTTCTCCTTCGCCCTCCTCAGATCCACTTGCTTGCTTCGTCTTCTCTTCCCGTTCAGGTACGACTCGATGGCGACGGCGGCGCTTGTGGTGACGGACGAAGTGGCGCTCCCGATCAGGGCGGTAGGGGNNNNNNNNNNNNNNNNNNNNNNNNNNNNNNNNNNNNNNNNNNNNNNNNNNNNNNNNNNNNNNNNNNNNNNNNNNNNNNNNNNNNNNNNNNNNNNNNNNNNNNNNNNNNNNNNNNNNNNNNNNNNNNNNNNNNNNNNNNNNNNNNNNNNAGGAGGTGGCTGTCATCACC…	gz_contig_1163	100	860	gi|226498936|ref|NP_001143696.1|
aj_contig_291	GCTTCTTGAAATTTGTGAATTTACAGCAGTCAACTTCTATAAGATTTTAAAATGATATACATTGGTACGTGGTGCAAGTGACAGCAACCTATAGATAGTACAGAACTTCATGTTACAAACAACTCCATCCTTTTCACAGTAGCTGTACATCAGATATTTTTAGTAACACACAAAACGTAGGTTACGGAACATATCCAGGTATCTACTGAGTTGTGGGAACATTTCTTCATGAATTTCACAAATGAGGCTCAGAACCTTTTTGGGGAACCGTAGGGTCTTTGAAGTTTCATATGGCCCACATCAAGCCAAGGATCTGAAATTGCAGGAGGACTTCGTCTTGTCTGATTATGAGCGTAGCTTTGGGTGTTGTAACCAGCACCAGAGGAATATATCGGATGA…	gz_contig_7623	100	905	gi|326505136|dbj|BAK02955.1|
aj_contig_292	TCCCGGACAGAAGCAAAATGTGCGTACAACGAACACACTTGTGCTTAAAGCAGATCGAGAGAAAAGATTGACATCAAGCTCCCTCTACTAAACAATCAGAACAAGTATATAGTCCATAGTAGTCACACGCGCATAGGCTAAACTGGTAGGAGTATTACAAATGCATCGGTTCTGCTTTTAAAATCACTCATGCTTCACGAACTAGTGCCCTCGCAACTACTAACAAACAAATCAAAAATTGCAATTTCTTTCTTCCACTGCTGCTGCTCTTTACCAGCTACCATCATATGTCAGCTGCAAGGAAGTTCCCAGACAAGGAAACCTTCTCTCCAGGCTTGAATGGTGGGAGGCCTCTGTATGGACAGGTACCACATCGAAAAGCATCACCCAACCCACAAC…	gz_contig_1166	100	680	gi|414584818|tpg|DAA35389.1|
aj_contig_293	TAGGTGGCTGGCGGCTTGGCAGAACGAAGGCTCCGGCGACGAGGCAGGCAGAAGAAAAGATGGCACTCACGAGAATTGGTCTTGCTGGCCTTGCGGTCATGGGGCAGAACCTTGCCCTCAACATTGCTGAGAAAGGTTTCCCCATCTCTGTCTACAACAGGACGACCTCCAAGGTTGATGAGACTGTGGAGCGTGCCAAGGCAGAAGGCAACCTTCCCGTGTATGGTTACCATGACCCTGCATCCTTTGTGAACTCCATTCAGAAGCCACGTGTTGTCGTCATGCTTGTCAAGGCTGGCGCACCAGTCGACCAGACCATCGCAACACTCGCAGCTCACTTGGAGGAGGGTGATTGTATCATCGATGGAGGAAACGAGTGGTATGAAAACACAGAAAGGA…	gz_contig_9494	100	1637	gi|414878798|tpg|DAA55929.1|
aj_contig_294	GGCAGTGGTGCGGCCCCGCATCGGCCAGCCTCTTCTCCGGCACTAATGGTTCCCCAAATGCCTGCATCGGCTCTTCAGCCACCTGTCCCAGGGCAATATTTTGCGAACAGGCCTTCGTTCTCGTATAATGTAGCGTCACATGTTAATTCTGGATTGCCTACTGGTCAGCAGTTTCAACTTGACATTGGCACAAACCATGCAGGCCAAGTGCCTAGATTTTTCTCACCAGGTTCCTTGCAACCTCCAGCTTCTGGGCAGTTAACTCGCCCTAATGCAGCATTCTCAGGAGCAGTGATACCAAATTCACCTTCAACTACTTCAAGCTCTTCCGGAAGTACTTCAACTCATATCCAGATGCCAGCAAATCAGTCTGTGGCACCTCCCCCTGATGCATTTGGG…	gz_contig_8483	99.04	1247	gi|242034143|ref|XP_002464466.1|
aj_contig_295	GCCCTGATTAACCACCCCCTCCCGGAGCACGGCAGAAAAAACTCGCTGTTACTCGTCCCAGTTTTCTCTAATCTCGCTTCACTTCATTCCGTTCAGAAGAAAACCAAATTTGAATTAGAAAAAGCGAAAAAGAGAGAGAAGAATTCCGTAACAAATCGCGGAGCTTCCATTTCCGATTTTCTGTTTCTCCGGACGTTGATCTCCCGAGCAGAGGAGAAGAACGCGCGGCAAATTTAGCGAGGATGGTGGCGATCGAGAG	gz_contig_4624	100	251	#N/A
aj_contig_296	CTATTTAGTGCTTGAAATTACAAATGGTTAATAATATCCTCTTTGTTAATTTGAGGACCAATACTTGACACATGGAAAGGCCATCTTTCACCACAGCAGCTCAAAACTGCCTATTATAAGGAGTAATAAAAATCTGTTTCACATCAAAATAATCTGATGGGGCTGCCCACAAATGCATCCACAACATAATCAGTTAGGCATTAGTTACGACTTATGACCAAGAGTGGTTGGAAGAGAAAGCACAGTTTCAGTGCTACCATGACTGACTGGCTTGTCCTCATCGGAAGGCTTGGAAGGCTTTTGCTTCTCACTAACATGCTGCAACGGAGCCCTCAATGGGTTACCTTGTGAATCCACAAAATCAGCTTCTTGTTTTCTTCTTTTCTTTTTCAGCTCACT…	gz_contig_4726	98.88	1871	gi|242055207|ref|XP_002456749.1|
aj_contig_297	CCTCTTTCACAAGATTGCCTCTACGGAAGCCAGACGCCTTCCAGTTTGAGTTGTCTCTAGACAAAAAAGATGCAATGCACTGAAGGGCACCAAGAGGAATACAAACATTTGTTAAAACTGCTATCAGACGTGAGTTTGTAACGGACCTAACGGTTTCTTTTATGCGGAGTACCTTGCATCCGAAAAATTATTTCACCAAAATGGCCGCACCTGCTCTATATGGTGCTAAGGATCAAAGATTTTGCTGTTCCAGGGCTATGCAAAAGAATATACATGTTTCAAAAAGGGTAGGTGATGGGGTCTCGCTGCAGAGCCTTCTGCACGAGTTCTGTTTGCTCCTGCACGTGGACGGAGTAGAAGCCCGTCGCGGTGGCTGCGGACGGGGCCCTTCCAACGTAC…	gz_contig_570	99.9	3020	gi|293335820|ref|NP_001169698.1|
aj_contig_298	CAGAAAACTAAACACAGTTACCAGTATGCTTTTATTACCACCACAAACTTACAAAGATCAATAGAGATGTTCCACAAATTATAAATGTTTTCCCTCTGGAACTGCTTAGTGCTTACATGAAAAGAAAGGGTGGAGCTTTTGATTTTCTGAACTAAATCAAGCACTGCAAATGGAAAATAAAGTTTGATTACAGCTCCTCCTTTGCATGCAAAACCATATCATATTATTTTGTGCGCGTCGTCTGTGCAGCAGCAGCTGCAGCTCAGATCTTGGAGTTGCGAGCAGTCTTGAACCACTCTGTATGGAATGAACCAGGCATGTCAACCCTCTCATAGGTGTGAGCCCCAAAGTAGTCCCTCTGCGCCTGCACCAGGTTGGCAGGCAACCTGTCCCTCCGGT…	gz_contig_10059	99	1796	gi|414878798|tpg|DAA55929.1|
aj_contig_299	GACGCGGCGAGAGACGCGAGAGAGCACGGAAGCGCACCCAGCAACACGAGGACAAGTCCAGAAGCCACTCAAAAGGCAAAGCAGAGAAAACAAGGCACAAAATAATGCAGTTACCTATTATCCCCATCTGCCTGCTCTCCCCTTCCCTCCCACAACTACCAGCACCCTCGCCGCGGCCATCACGGNNNNNNNNNNNNNNNNNNNNNNNNNNNNNNNNNNNNNNNNNNNNNNNNNNNNNNNNNNNNNNNNNNNNNNNNNNNNNNNNNNNNNNNNNNNNNNNNNNNNNNNNNNNNNNNNNNNNNNNNNNNNNNNNNNNNNNNNNNNNNNNNNNNNNNNNNNNNNNNNNNNNNNNNNNNNNNNNNNNNNNNNNNNNNNNNNNNNNNNNNNNNNNNNNNNNNC…	gz_contig_12965	99.78	1343	gi|242051581|ref|XP_002454936.1|
aj_contig_300	AGATGGCCAAAACTCTACAGTGTAGCTTAACACGAAGATGGCCAAAACTCTAGTGTGGGTTAACACAAAGATGGCCAAAACTCTACAGTGTGGGTTAACACAGAAGATGCCATTGTAATGTACAGAGTTTCATGGCTTACTTGCTGAGAAGGTATCAAGATGTCTTCTAGTTACCAAAGTCTTTTGAAGATCGACAACAAACTCGACAAAACTTCTGATCAAGTCATGATCCATCATCAGAAGCAGTTTCATGCAAAGTTTGAGGATTCTGCAATCCATCCTCTGGCATTTCAAATTCAACCAGTGGCTTCAGTTGCTTCCCAATAGCATCTTGCTGGAGCTTTATCTCTTCAATAACCATGCTTTCTGCTGCCTTGCATGATTGCTCATCACCAAATG…	gz_contig_13806	100	2735	gi|242075284|ref|XP_002447578.1|
aj_contig_301	CCACTGAAGCACCCTGACATGCACAAGGTCACTACCCGATTTTGCTGCTACAATTACGACAAAAACACCCAGAATTTGTTGAACTTAATGGGCCTATCAAGGGCCGCGCGCCTTACACAAGCTTACATTGCCATGGCCTCCTCCGACAAGACAATGTTCTGCAGCAAGCCGAAGCTGCCAGTGCCCACCTTGGCAGGTTGGCCAAGGCAGATGCTTGCTGAGGGACACTCGAGAGTGTCAGACTCTCCATGGGTTGCCGCTTCCACAATGAACTTGGTTGCCGTCTCGAAGGTCATCTTGCCAAATGGCGAGGTGCAGCGCTGACCAATCCCTAACCGGTTCATTGGCCGGTAACCCCCATCAAAGGTCATGAAATCCGCGATCATGTTCAGATGCCTA…	gz_contig_404	99.75	2363	gi|242088681|ref|XP_002440173.1|
aj_contig_303	CCCAATTCTCTAAAACTTTCCATAGATACAGCACAATCATTTTACTAACAAAATATGGTTATCATGGATTCATTGACGTCGAGATACGAAACCTGCTTCATCCCAAGAGATGCAGCTTGACAACAATACTTCTTCAAGCATCAAACAACACCCAACNNNNNNNNNNNNNNNNNNNNNNNNNNNNNNNNNNNNNNNNNNNNNNNNNNNNNNNNNNNNNNNNNNNNNNNNNNNNNNNNNNNNNNNNNNNNNNNNNNNNNNNNNNNNNNNNNNNNNNNNNNNNNNNNNNNNNNNNNNNNNNNNNNNNNNNNNNNNNCCCAACTCAAGGTTCTTTTTCCTCCTGATGCCCTAAGGTGGCTGAATTGCAGTGGCTCCAAGAATAACCATGGAGGATTGAGATGA…	gz_contig_6612	99.41	2525	gi|413935635|gb|AFW70186.1|
aj_contig_304	CCGTTCCGTTTTGAACAGGCGACAACAATTTTTGAACGGAGAGTACCTTGTAAGCGGCCACACTGGATATGCATGCCACGGTTATCTTCCGCCAAGCACCCTCGGGGAACTTATGTCCAGGAGACCAGGACGTAGAGGTCTATATATCTTTGCTGGCGGGCAATTCTGATCTATTGCTCAGCCGTAGCTCCAACTTTATGTTCATGGCTGCTAGCTCGGCCGCCAGATACCTGAACACGTACGGCATGGCGACGGTTTCCATCCCTTTGCTCGTTTTGCAGGCCTGGCACGCAAAGTTTTTCTGAGATTTCAAGGTAGGGAGTCCAAGCATCTCATGCTTGGCTTTCTTCTGGGGATCAGATTTTATCACCGTCGCAGTCAGTAAACTCCCACAGAGAG…	gz_contig_10293	100	1610	gi|414870913|tpg|DAA49470.1|
aj_contig_305	AAGGCGCACGCCAAGACCTGCGGCACCCGCGAGTACCGCTGCGACTGTGGCACGCTCTTCACAAGAAAGGATAGCTTCGTGACACATCGTGCGTTCTGCGGTGCTCTTGTGGAGGAAACTGGTCGGGCGTTAGCGGTACCTGCGCCGCCATCTCCTCGGCCGCCTGATTTGGAGGCTGAGGATAATGTGGACAAGGACAAAAAGAAGAGGGAGGAAAATGAGAATTCTGCTGTGGCTGAGAAAGAACAGCTGCCATGCGCCAAGGCGTTGGCGGAGAAGCCACAACACATTCAGTCACCACCTCCATTGCCACAGGAGCCACAACATAATCCGTCTTCGCCTCCATTGGCTCAGGAGCCACAGCCCCTTCACTCACGGCCTCCATTGACACAGCAGCCA…	gz_contig_12454	78.11	698	gi|242046100|ref|XP_002460921.1|
aj_contig_307	GAAGCGACGATGCGCAAGTGGGCTCTCTCCTCCGCGCTTCTCCTGCTCTTCCTCCTCACCACCCTCCCTGATCCAGCTAAAAAGCTTCAAGTGAATGCCGAGGAGAGCAGTGATGACTTAGCCAACCCACCAAAGGTAGAGGAGAAGCTTGGTGCTGTGCCCCATGGCCTGTCCACTGACTCTGAGGTTGCCCAGAGGGAAGCCGAGTCGATCTCCAGGAAGACCCTCAGGAGCTCGGCGGAGAAGTTTGAGTTCCAAGCTGAGGTGTCCAGACTTATGGACATCATCATCAACTCACTCTACAGCAACAAGGACATTTTCCTGAGGGAGCTCATATCCAATGCCTCTGATGCCTTGGACAAGATTAGGTTCCTTTCCCTCACTGATAAAGAGGTTCTT…	gz_contig_1404	100	1310	gi|226502706|ref|NP_001151475.1|
aj_contig_308	TATTTGTTCTTTTTTTCCTTTTTTAGATTTTATAATTTTCGACAAGCTCCAACGAAGTCACGTAAACAAGGTACACATTTGAATGGCGGAATAAGCAAAGTACAACTGATGTTACAACATAGGTGCCAGTGCCAGGGAGTTTATTATGCACCAAGTATCGATCCAACGCCTTGTTTGAGTAGCCAAACTAATCCACTGGCACCGGCTCCATGTCCTCAGCCTCCTTTCTCAACTCATCGAACAGAGCTGACGATAAGTATCGCTCTCCCAAGCTCGGAAGAACAGTCACTATGAGTTTTCCTTTGTTTTCTGGCTTCTTCGCCAGTTCAAGTGCTGCGACTGTGTTTGCGCCTGATGATATTCCAACCAGAAGACCCTCCTTAAGCGCCAACTCTCTAG…	gz_contig_3773	99.74	1175	gi|242075074|ref|XP_002447473.1|
aj_contig_309	TCCGGGCTGAGTGTGATCCCGGACACTTCGCCAAAGAAGTCAATTTCCTGCCGCTGCTTGTAGTCCGCAGCAACGCTGTACACATGCACAAAGTCCGCAGGCTCTGAGAAGAGCAGAAAGCGCCCATCAGAGGAGTAGCGGATACACCGGATTGCCCCGATGTTGCCTCTCAGGACTGCAAGGGAGGTTGAAGTGTTGCGGATGTCCCAGACACGGCATGTCTTGTCCTGGTTCCCAGTCGCAAAGCTGCGGCCATCAGGGTGCCATGCTGAAGCGAACGAGTAGTCCAGGTGGCCAACTAGGGTAGAGGTTACCTTCCCATTTCGTGAATCCACAAGAAGAGCATCCCGATCATCTCCAACTACTGCCAAAAGTCTCCGATCAGGACTCATGGAAGTG…	gz_contig_4426	99.73	1100	gi|115466678|ref|NP_001056938.1|
aj_contig_310	CGACGGCGGCGCGTCGGACGAAGAGATGGACGTGGAGGTGGAAGACGAGTACCACGACGACCACGCCGAGGACGCCGACCATAGAGACGGCGGCGTGGACGGCGATGACAACGACTACTCGCTGCTCACTCGGATATCTGACACGACGGCAGCTGAAGCAAGGGCAGGAAAGGATATACAAGGCATACCATGGGAGAGGCTAAACATAACCAAGCAAGATTACAGGAAAGCTAGGTTGGAACAGTACAAAAACTATGAAAACTTCCCTCAATCAGGAGAGCTCATGGATAAGTTGTGCAAGCAAGTCGAGAAGAGCAGCAAGTATTATGAGTTTCACCACAATGCTAGATTAGTAAAGCCATCTATTCTCCATTTTCAGCTTAGAAATTTATTATGGGC…	gz_contig_6572	100	1541	gi|242092152|ref|XP_002436566.1|
aj_contig_311	GCGAGGATGCCAGATCTACCGAGTCCTGTAATAATATACAATAAAACAACATTTACTTAAAAGCCCTGCAGCTCCCTTCAATATATTGAGGCATTCTATCTATGCTCCATTTGCACATTCATGGGTTGATAGATTTTCCAGGTACTTCTCCACGATATCAAAACCGCATAGTTCTTTCACCAATGGCATCGTTGCAGGCACATCAAGCTGGAATGTCAATGGCGAACTCTTTTGTCCAGTGCTGTCTGCGAAATCCTTTCTTGCTGCTCGGATTGCTTCTCTCAGTGCACAATGGACGGATGATGCAAGGACAACGGCAGGTTCACCAGAAGCTTTCGATGAAAGCACACGGTCCTTATGATGCCCAGTGTTCAGCAGTTCGACATTGAACTGCTTTGG…	gz_contig_7618	100	2492	gi|357119054|ref|XP_003561261.1|
aj_contig_312	TCTCCTTTTTTTTTCATCGTAAGCTTGACACTACTACCTCACTTTCACATTAGCAGCATCCAATAACCCGTGCTCACTGTAAATTAGTGCATCTAAACACTATCACAACATAGCCTAGTAGCACTAGATCAACCTGAGCTGCTGTGGCTGTCTGGTGCCACCACCCTGATACGGCGCGCAGAGGAGCTCCATCTGCGGCGGCATCGCCGGAGTTGGAACCATGGTCGACACCGGACGCAGGGAGTTGTGCCATGCAGCTCCTGGCGGTGCAGCGTCCAGACTTCTCGGTTGGTACTGAGCGACGTGGAACTGCCAAATCTGCTGCTGCTGTGTTGGCATGAGCTGCTGAAGCTTCATCAAGGCTGATGAGTTTGCGGTCAGCCCGGGGCGCGGAGTGTA…	gz_contig_17247	99.38	1448	gi|413926639|gb|AFW66571.1|
aj_contig_313	AGCTCCGGCCCCGGAGGCCGCGGAGCCGGAACCCAAGGCGCCAAAGGAAGACGTCGCCCAGGAGAAGGCGGTCGTCCCCGCAGCCGAGCCATCGGCAGCGGACGAGAAGGCCGTCAGCCCCTCGCCCGAGCCACCGGCAGCGGAGGAGAAGGCCGCCATCCCCTCGCCCGCGCCACCCGCAGCGGAGGAGAAGGCGCCGGCCGACGACTCCAAGGCCCTGGCCATCGTCGAGAAGGTTGCAGATGAACCTGCTGCTGAGAAGCACGCAACTGAGAAGAAAGGGAGCTCCAACGATAGAGATGTCGCTCTTGCAAGGGTGGAAACAGAGAAGAGGAACTCTTTGATCAAAGCATGGGAGGAGAATGAGAAGACTAAAGCAGAGAACAAGGCTGCTAAGAA…	gz_contig_4690	100	308	gi|242076586|ref|XP_002448229.1|
aj_contig_314	CTAGCACAGCACGACAGCATGTAGACACACATAACTTGTACTACTACTTCAATTAAGAATGAAAATGTACAGGCATTACACTGTACTTTTATGTAGAAGACATGCGCATACGCTACGAAGCACATACGACCGTTATACCGGTACGTTTTGACAAGCGACTAGTCTGCACGTTATAACGCGCATTACATCACAAAATCACAAATGCCTTTTCACGCACATCGACACCGACACAGTACTGAGTGTAACAGGCACTTGGAGTAGAAATATAACGCAATTGGCATCGCGTTTTTTATTTGCTTCATGACCATTTCTTCAGGGTAGCCAAGTTGGCATGAAGTTATTCATCTGCTCATGAGCGAATCCAATCTGCAGGGTCGGCTCCGCGGCACCGTCGACCAG…	gz_contig_3218	100	683	gi|414589918|tpg|DAA40489.1|
aj_contig_315	ACTTGGAACAAATTTGTTCAGAAATGATACAATACCGACAATTATGTACAAAACCGCAGGAGACACTTTTCAGACTGGAATAACATGTATTGCTGGGAAAATGCGCATTCGATTTCTTTCATGAGTCACTCAAGAAACAGGAGGCCATGAATGGGGTTGATCCATCAATCCGATCTTCTGTCATTTAGTGAAAAATGCGCACTCCCGATAAGTGACGTCAGGGCAGCCTTGCACGGGTTGTTAACTTGTTATAGGCGGTGCCCTGCCAACAGCTCTCTGGACCTTTCCCTGGCAATAAGCTATTGCTTCCTAGTCCTCTGAAAGGGCATAGACGACAGCAGTTCTGCTAGGAGCATACACCGAGAAAGAACAAGGTCTATTGTCATGCGGCCAATCAGC…	gz_contig_7669	100	2054	gi|5689138|dbj|BAA82828.1|
aj_contig_316	AAAAAGAAAAGGTTGCTTGGAGAGAGAAAAAGAGGAGCGATTCGTCGGTCAGTCGTCCCCTACCTCCAGCCACACCGTAGAACCATCACCACCACCCAGATCTTGCTCAGATCTGCGCCGCTAAATCCACCCTCGCCGGCGCCGGAGGCGCGCACCAGGATGCCTTCGACCGTGCGGGGCTGCTGCTCGCCCCTGCGCCGCCTCCCCCGTGCCGACGACGACAACGCCCTCTCCTCGCCCTCCGGCTGCTCCCATCGTCTCAAGCCTTGGTCTTGGCGTCCCCAATCCTCCTAACGCGTTCCTCCGTCCGTCGATCCACCCATCCACCCACCAATCCCCTTCTTCCTTCCCTCCTTTTTCTACTTCTTCCCGCCACCTTGTTCTGCGCTCGTAATTAGC…	gz_contig_2044	100	368	gi|357134799|ref|XP_003569003.1|
aj_contig_317	TAAGCCGCCGAAATAGTAACTGAGTACAAGCTACATACTCCATGAAACGTGAAACAGCATAGATCCAGTGAAAGCATTGCTCGCAGGGTTCTCATGATCTCCTCCAAGCCAACACTTAAACTCACAGCAAGTCACAGGCATAGGCCAACATAGTCATAGATTTTCAAGAGATAACAAGTTTTACCTGCCAGGTGCTTGGCCTTCTACCTGCGTCTAGGGGATGGTGAGCTGCTGCTCCTGCTGTCACTAGAGATGCTTCTTCCTCTAGGAGGCCTTCTAGGGCTGCGACTCCTTGAAACCCTCCTTGGCCCCTTTCTTGGTGGACTAGGCGAGCGGGAATATGATGAATCTGAACTTCCACGCCTCAATGGAGGACCACGACCCCTTCGACTCCCAGGA…	gz_contig_2735	100	560	gi|413951260|gb|AFW83909.1|
aj_contig_318	AGGCCGCGAGGCGGGAGGACATCCCCTACATCCGGTGCCAGGTGTGCGAGCGGATCGCGCGCGAGATCTCCGCGCAGGTCGCCAAGAAGCAGCAGGCGCTGCCGCCCTCCAAGAAGGTGCCTGAGATCGAGATCATCGACATCGCGGAGAATGTTTGCAACCTTAAGAAGCAGGAGGCGGACTGGATGCTCCGGATCGATATCGTCGAGAAAGGCGACAAGTTGGAGCTTGTTGAACAAGAAGAAGAAGGTCACTGTAATGCAGAATGCAAGACCATCGAGCGTGCATGTCAGGAGGTGATGGGGTATGCTGATACTGATGTTGCTGAGTTCGTCTACAAAAATAAACCCTCACTTGATGAGCTGATGAAATTTCTCTGCAAAGATCTTTCAAAAGCAT…	gz_contig_34	100	1052	gi|195627550|gb|ACG35605.1|
aj_contig_319	TCGGCGTCCGGGGTGATGCTCTGCTTGGAGAACTGGTACTACAGATTGTTGATCCTCCTGACAGGGTACTTGAAGAACGCTGAAGTCGCGGTGGACGCACTCTCCATATGTCAGACGATCAATGGCTGGGAGATGATGATTCCATTCGGGTTCTTGGCAGCAACAGGCGTGAGGGTGGCAAACGAGCTCGGCGCCGGGAGCGGCANNNNNNNNNNNNNNNNNNNNNNNNNNNNNNNNNNNNNNNNNNNNNNNNNNNNNNNNNNNNNNNNNNNNNNNNNNNNNNNNNNNNNNNNNNNNNNNNNNNNNNNNNNNNNNNNNNNNNNNNNNNNNNNNNNNNNNNNNNNNNNNNNNNNNNNNNNNNNNGTTCTGGTGCTTGATCCTGTATTTCGACGACAGCAT…	gz_contig_17963	99.36	470	gi|226497614|ref|NP_001147862.1|
aj_contig_320	GCCGCTGCCGTCATCGGCCTGCACGCCGCGTTCCGGATGAACTATTACCTCGACGAGAGGGATGCTTTCGACAGCGCCGGTGCCTCCTTTACAGATACCAGCTACGGCTACACGCTCCCAAGATGATGCATGTATTCAGCCGATTGGATTCTTGGTGGCTATGATCCATCATGTCTGATTTGTAAGGTGTTCTTGCAAGTTGTAACGTTCTCTCTGTTTTCTTTTTCTTTTTTGCCAAGCTGTTCTTAACTTTCATATAGTTTGTTTGAATGTGTATAGCTAGTC	gz_contig_24839	100	218	gi|242032677|ref|XP_002463733.1|
aj_contig_322	GAGGGAGGTGTGCTAAATATGCTACGACCAACAAGGTGAAGCTAATATTATACATGAGCTGACAGACATAACCATCAGATAAATTAACTGCAATGTATCAACGCTCCAGCTTTTTTCAACAAAGCAAAATTTTGACCCAGAAAAAGAATACCTAGAACAATAAACACTATCCATTTGGACCCTCCACTAGGTTGATAAAAAGACATACAACACCTATCTGCTGGCATCTGAGTATGTACAGGCGATCGCAGGCAGACCCTGCCATAAGCCAACAATCAGTTCTGTTCTTCTACTTCTCATGGTTCAGGAACGAATTTGGAGAGTGCTGTCGGTGGCGATGGGTGAAGCTTCTCTGACTTTCATCTTCAGAAAGCTTACTCCTGCTCCCTGAACAGTTTT…	gz_contig_511	99.44	1607	gi|414868987|tpg|DAA47544.1|
aj_contig_323	GGCTTCGACAGCCAATTTCCTCTCGACATTTACATCAAGCACACAAACAAAAGACTGGGAGTTCGAATTAAAAGTTGCTCCAGAATCCACTAGCGCCGCTGAAATTTTAGTTGCCTCCACGTATGCACCGTCTGACGGGAGAAGGTTATTTATACACCGGGAGAAACCAAGAAGCGGGGCCCGGCCTACCCCGTGTTCTGCATGCCGGCGGCGATACCCTTCATGGTGAGGATGAGCGTGTCCTCCAGCCCTGGCGCGTACTCGCTCCCGGTGTTGAGCTGCACCAGCTCGGCCGGCTGCTTCTCGTCCGTGAACTCCTTCGACAGCGCCGGCTGAGGGCTCACCTGGAAGTTGGGGTCGCGGATCCGCTTCAAGGTGTAGGCCTGGCACACGTTCAAC…	gz_contig_1343	99.88	2522	gi|242061132|ref|XP_002451855.1|
aj_contig_324	CTCGCCGTCTCTCTCCTCCCTCCCACCGCTTGAAATCGATTCGATTCAGTTTCGTTCGACTCGCGCGCAATCCGAGCTTCCCTGGACCCGAATCGTTGGAGTTTGCTGATTCGTGGAGACGATGGCGGCGTACTTGGGCGACGACTTGGNNNNNNNNNNNNNNNNNNNNNNNNNNNNNNNNNNNNNNNNNNNNNNNNNNNNNNNNNNNNNNNNNNNNNNNNNNNNNNNNNNNNNNNNNNNNNNNNNNNNNNNNNNNNNNNNNNNNNNNNNNNNNNNNNNNNNNNNNNNNNNNNNNNNNNNNNNNNNNNNNNNNNNNNNNNNNNNNNNNNNNNNNNNNNNNNNNNNCCGCCGGCGATGCACCCAGACCGACGAATGATACGTCTGCCGTGGAGTATAGGA…	gz_contig_21319	100	617	gi|242050938|ref|XP_002463213.1|
aj_contig_325	CTCCGCCGCTTCCTGCAAGAAGGAATCAATGATTCACAGAGATGGGAGATAATCTGCAAGCTATCCATTGGTATTGTCAAGGGATTGGACCACCTCCACACTGCATCGCAGAAACCAATCATTCATGGAAACCTGAAAACGAATAACATCATGCTTGACGCTGATTTCCAGCCCAGGATATCAGACTTCGGTCTCTACCTCCTGCTGAACCCGGCTGCTGCGCAAGAGATGCTCGAGACTTCTGCAGTGCAGGGGTACAAGGCTCCAGAGCTGATCAAGATGCGGGACGTCACTAGGGAGAGCGACATCTACAGCCTCGGGGTGATTATGCTCGAGATGCTTGCTCAAAAGGAGCTGCCGCCAAATGATCGCCAGCTGAACGCCCGTGAGATCCATCTG…	gz_contig_19018	100	530	gi|242076692|ref|XP_002448282.1|
aj_contig_326	TCTGCTTAAATGTCAACAACAACGACGACGACGACAGCAATGCGACTTCTTAACTACACATAAGAATGTTGCTTGTCCAAGCATCAAGATGTACTCCACCAAACTTCTGTCTTGGAAGTAAAATATGTGTATATACAGCAAACCTAGACTTTACACACCAGGGACGGTTTCCTTGCACCGAAGACACACTACACACTTTTTGATACGGTGAAAGGAGGACGCAACCACGGATGAAAAGCTTCAAATTTGCATGGAGTGACTTAGTAAAGACGTTTCTTAGGCTCCGAAGCACCCGATCATTTTCTTCGGAGTGTGGCCCGTGGCACGGTATTTCGCGGCCATCTCCTCGGTCTTCAGGACTTCCTCGCCACGCTTTGCCTCCACCATTGCTCTCTTCTC…	gz_contig_2587	99.3	428	gi|115459618|ref|NP_001053409.1|
aj_contig_328	CCCCCGTTCTGCCTTCTCCCCCATCGCTCTAAGCCCTAGCCTGGCCGCTGTCGTCGCCGCCGGGGACGATGGCAAAGCCTCCGCGCGGCCGCTCAGCCTCGCGCTCCTCCTCCGGATCCTCCTCCCGCTCCGTCTCCTCCGGCTCCGTCTCGTCGCGTTCGCGCTCTCGCTCCTTCTCGTCGTCCTCGCCGTCCCGGAGCCGCTCCCCTCCCGCAGCCAAGCGCAGCTCACCTGGAGCACGGAAAGGCCGGTCACCTTCACCACCTCCTAAAAGAGGTTCACCCTCAAGGAAAGGCCGTTCTCCGTCACCACCTCCTAAGAAGGCTTCACCTCCTAGGAAAGAGTCTCCCCCACCTGAATCAGTTGTTCTCCACATTGAACATTTATCAAGGAATGTTA…	gz_contig_7739	100	407	gi|357126878|ref|XP_003565114.1|
aj_contig_329	AGGCCAAAGTCCATCAGTTGCTAAAATAAGGTGTCCAATACAAATGTACCATTATTGTAGAAAAAAAATACAAATGTACCATTCAAGACAAAGCTTCTACAGAACATAGTCACTTTCAAACAGAGCTGCTCCAGGCAGAGTATATTTATCATGCAAAGAGATGCCCAGAATGAAATCAGTTGCACGGCTTTTTACTCTCCTGGTGCAGAAACGCCCTGCTTCAGCTTTTCCCTCTTCAGCTTCTTCTTTGAGACTGGTTTCTTTTTCTTAGGAGGAAGCGTCTTCTGTGCATACACATAGAGAGCATAGTTCCCCACAAAGAAAAGCAATAAGAAGCTTGCAACCACAAGCAGGACTATCATTCCTGGGTTCAATCCCTTGCTGACCTCCTCAATGACG…	gz_contig_9012	100	296	gi|115458242|ref|NP_001052721.1|
aj_contig_331	CGTCAGGCTCAACCCGCTCCAGCGCAGTGCCAAGAGTCGTTGAGGCTGTTTCCCCTGAACTCGTTCAGCTTAGGAATTACTTTTGGCTGCTCATCCAGCTGAGCAGGTTGAGCTATTCATTTGGATCCTAATAGTGGATAGAGGCATTATTCACGGGTATTGCATCGCCATCCTGTTGCTGTTCTGTGTTGTGAAGATCACAAAATCCAGCTGGCTACAATCTAGGATTGTAACAAGAATGGGGGCAAAAGTATAGGGTGAAATCTATATGCCTAGATATTATGGTACGGGAGATCTCAACATCAAAGCAAATGATAGGTGGAACATACTATGAGGACAAAACATCAAATAGCCAGTTGTGCAACGGATTTATGACAAAATTAACAAATGGTTATTCTG…	gz_contig_1005	99.88	2447	gi|414872933|tpg|DAA51490.1|
aj_contig_332	GGACTTCGCCCGCTTACTAGGAGGCTCCGGATGCCTCCACTTGCCCCACTTGCTGCTAGCTACCGTCACGGGCTCGGCATCCGCGGCGCACCGCTGAGCACTACCAGTGCTGGGCACCAGGGCCTCAGCTCGCGCTTCCGATTCGACGCGGCGACGGNNNNNNNNNNNNNNNNNNNNNNNNNNNNNNNNNNNNNNNNNNNNNNNNNNNNNNNNNNNNNNNNNNNNNNNNNNNNNNNNNNNNNNNNNNNNNNNNNNNNNNNNNNGCAGCGGCAGAGGCGAAGCCCTTCGCCGTCCTCTTCGTTTGCCTCGGGAACATTTGCCGGAGTCCTGCAGCCGAGGCTGTGTTCCGGAACCTTGTAAGCAAGCGTGGCCTTGACTCAAAGTTTCACATAGACTCTG…	gz_contig_13536	100	773	gi|414870124|tpg|DAA48681.1|
aj_contig_333	GTCTCCTCGACCTTCTGGACGACGGTGGCGTTGTCGTTCTGGTGAACGTGCGTCGTCGTCACGGGCGCGGGCGCCGACGGGATGTACGCCTTGTGGTCGTCGTCCTCCTTGTAAGCGTGCGTCTCCACGGACGACGGCGCGTCCGGCTTGTGCTCTGCCTCCTGGTGGACGTGCGTGGATGCAGGTGCTGGAGCCTGCACGTACGGGTTGTGCTCTGCCTCCTGGTGGGCGTGTGTTGGCATGGGTGCCGGCGTGTGAGACGGCTTGTGCTCGCCTTCGACGTCGTGGTCCTTGTGACCGGGCAGCTTCTCCTTGATCTTCTCCAGGAGTCCCTTCTCCGGC	gz_contig_6187	95.52	200	gi|195638184|gb|ACG38560.1|
aj_contig_334	CATATCACGAGTTCGAAATCTTAGTATCCAGTACTATCCTACAGCTTACAGTTCCAAACGACAAAGGGACTTGCAACTACAGGGTAGTACACATGATCATAGATACGGATACACTATGGACGGACATTTATAGCAGACAGATACACACATACATACTCTACAACTAAAAACACAACAGCAGCTGGCCCAGAGGGGTCTACTGCTCTATTAGGTACTCTAGCGCAATGCATCGGCACTACAGTCTAACAGTCATGAAGAGGGTTCGTTAGGTGCTCCTAAATGCTGATCACAGATCTGGCTGGGTGCGATAAGCTGCCTTCAGGAAGTTATCAAAGGGGCTGGCCGGTGGTAGATTCACTGTGGAGCATGATTCAGATGATGTGCTGCGGTTCATGCTTT…	gz_contig_3961	99.62	3140	gi|242035955|ref|XP_002465372.1|
aj_contig_335	CTCCTTGCTGGCTACGGCTGGTCCGAGGGTAAAGGTATTGGTAGGAATAATAAGACTGGTGATACCAAGGTTGTTGAGTACGATCGGCGTGCTGGTACACAGGGGCTGGGTTACAACCCCTCTGCTGCCGATCCAAAGAAGACTCGCTCCGGTGACTGGATTATTGGCGATAAGAAGGCGGTGGAGAATGGGTCTGCAAAGAAGAGGGATAGAGATACCAGGGACAAACAGCAGCAGGAGAAGGATTCTATTGCCCAGAAGAAGAGGTCTGGTGAGCAAAGGTCAGAGCGGGAGGTTCATCAAAAGGAGAGGAATGGCCGGGATAGCCAAGAAGGAAAGAGTAGCAGTGGTGGAACTGGTAACAAGGTCCGCTGGTTACAGAGCCATATCAGGGTTCGT…	gz_contig_7064	99.38	485	gi|242036301|ref|XP_002465545.1|
aj_contig_336	GGCGGCCGAAGAGCCTCGACCGGCACCTCCGCTTTCGCCTAGCCTCCGCCGTCGGCCTCTACAAGCGAGCCCACCATGAAAAGCTTCGGGTTCTTGTGCTGGTGTCAAAATCCACCCTGCAGTGTGAACATGGTGTTTCGTTTCAGAGTGAGTATGTTGTTCCTGAAAGTGCAAAAGCTGCTGGATTTGAGATTTGTGCTGATGAATTGGCATCAATTGTTGAAACTCGTGACAATAGAAAGTTGTCTATGCATGGCCAGTTGGATGGAATTGCAGACAAATTGGTGACATCGTTAACTGATGGAATTAGTACAGATGAGTACAGTCTGAATCAAAGACGAGACATATATGGAGTGAACAAGTTCACTGAAAGTGAGGCCCGCGGCTTATGGGACTTTG…	gz_contig_122	99.59	2939	gi|242038845|ref|XP_002466817.1|
aj_contig_337	CCAACCCTGTGGAACGTTTAACAATTTAACAGTTTTCCATTTCTAACGTTGAGACTAATGTGGCTGCTAATCTGTAGTTTCTTTGCTTCTTCAGGTGATCATAACTTCTGGGATGAGGAAGGCGGTCACATTTTCTAACAGCAAGGTGAAAAATAATCCGCGGTTCAGCTAATCATAGAGCCCTTCTTCATGCCATATGTCAACCAAAAAATCAACCATCTCAGATAGTGGTATTGGTTGAGGAAAATGCTCACTTGTCGACAAGAGATCATCATATGTTGTGCACCAACTTATTACTGGCTCTCGAGGTGCACTTTTTGGAACTTTTGCCTGATGACCAACCCATTGCCTTCTCATCTCAGCCCAATGCTCAGCAGCATGGTTGGTGAATGATGTATC…	gz_contig_7222	100	794	gi|242050226|ref|XP_002462857.1|
aj_contig_339	AACATCTTTAGCTTGCCATTGCCCTATGACCACCACGTTAGATACATACTTGCATTCTTTTACATTTTGCGCTAATTCTGGACCCTTCACGGCACAACATCACAGCTAAAACATGCAGAGCATTATATTACATAGCACGAGTTCCAGATAGAAGTATTCAGTACTATCCTAACGCTCAGAGTTCCAAACAGCTAAGGGACTAACTACATGGTACACATGATCATAGATATAGATACGCTATAGACATTTTTAGCACACATACTCCACAACTAAGACAACGCTACAGCTACAGGTCCCAGAGGATCTGGTGCTACATTAGCTATGGAAATGCTTTGGTGCTGCAGTTTACCAGTTGTGAAGAAGGCTGGTGAGGTTCTCCTCAATGCTGATCACATCTCT…	gz_contig_4307	100	3221	gi|414866471|tpg|DAA45028.1|
aj_contig_340	AATGCTGGAGGTTTCTGCAAACCAATTGAAGCCCCAAATCGGTTTGCTAGGTCAACAAGCATGGTTTTGTCTCTGCCTACATCTGCGATTGAGTTGTAATACCCAAGCCATGCATGGTATGCTGCTTCTTTGATGCTCATATCCACGATCTTTATCGAATCATCAACCTTCTGTTTCATTTCCTGATTAATTTCTGGCGCTTGATCCATCTCCACAGGGAGATCACTTATCTCATTCAAGAAATACTCTTCCCATGGAGCGATCAAAAGAATTCCTCTGCCAAATTTTCCCTCTCTCCCTGTCCTTCCAAGCCGGTGTATATAGTGCTCTCTACCTGGAGGAGCACCAACCTGAATCACTAAGGTGACATCTGGATAATTCACTCCACGAGTTGANNNN…	gz_contig_6403	100	626	gi|242067048|ref|XP_002454813.1|
aj_contig_341	CAAATATCTGTGGCGTCTCGCCGCTCTCGCAAACAGCACTAAACACCTACCGCCGCTTCGAATTCGTCGGCCATGGCGAGCCAGGGAGAACAGTCCTCCTCCGATCCGAAGGGTAAGAAGGATTTCTCGACGGCGATCCTCGAGAGGAAGAAGTCGCCAAACCGACTGGTGGTCGACGAGGCAACCAATGACGACAACTCCGTCGTCGCGCTCCACCCGGACACCATGGAGAAGCTCCAGCTCTTCCGTGGCGACACTGTGCTGCTCAAGGGTAAGAAGAGAAAAGACACAATCTGCATCGTTCTTGCAGATGAGACATGTGAGGAGCCAAAGGTCCGGATGAACAAGGTCGTTAGGAAAAACTTGAGGGTCCGACTTGGTGATGTGGTTTCTGTCCAC…	gz_contig_3621	100	2180	gi|242036895|ref|XP_002465842.1|
aj_contig_342	CGGGCATAAAGATAGATTCCTCTATTTGACAGGGCTGATAGGCAAGCATATATTTATATGGGCATTGTAGCAGGCTATTTTTTATGCATGGGCCATGGACATGCACACCCATGAGCCTAGACTACCCCGACGGNNNNNNNNNNNNNNNNNNNNNNNNNNNNNNNNNNNNNNNNNNNNNNNNNNNNNNNNNNNNNNNNNNNNNNNNNNNNNNNNNNNNNNNNNNNNNNNNNNNNNNNNNNNNNNNNNNNNNNNNNNNNNNNNNNNNNNNNNNNNNNNNNNNNNNNNNNNNNNNNNNNNNCCGGCGCCGCCATGGTAGCGCAGCCCCTCCTGGGGATGCCCATCTCGGTGACGGGATGCACCTCACGACTCTTCTCGGGGAGGACAGGGCTGAGCTTGGCG…	gz_contig_2568	88.83	536	gi|242085476|ref|XP_002443163.1|
aj_contig_344	CTCACCATATGGTGGGAACATAACAGTGTAGACAAACACATTTTTTTTTTACAGTAATAAATTCATCACTCTTTATGCGGAGCTGACACACAAGCATACAAATACATAGATTTGTTTGATACTATCAAACCAACAAAGCATACATATCATCATCACTCAAACCATACAAGTAAACAGACGCAAGCTCTAGAGCCAGATCGTCGATACTGGCTGGCTCCTCCTTATTCTAGACTGTCATGTTCACACATACGTTATGTCACAAGCAACATAGGAGTACTACGGATCAGCAGTTGCAGGGGT	gz_contig_7147	98.84	257	gi|380092543|emb|CCC09820.1|
aj_contig_345	CGGAGGACCCGGGGTCCAAGCCCCTCGTGCTCTGGCTCAACGGAGGGCCTGGTTGCTCGTCAATTGCATTTGGGCTAGGAGAAGAAGTTGGACCTTTTCATGTTAATGCAGATGGAAAGGGGGTGCATATGAACCCGTATTCATGGAATAAAGTTGCAAATATATTGTTCCTTGATTCACCGGTTGGTGTTGGTTATTCATATTCAAACACCTCAGATGACATTTTGACAAATGGGGATGCGAGGACTGCCAAGGACTCTTTGGCGTTTTTACTGAAGTGGCTTGAACGATTTCCACAGTACAAGGGTCGTGAATTTTATTTGACAGGAGAGAGTTATGCTGGTCACTATGTTCCTCAATTGGCTCAAGCCATAAAGAGGCACCATGAGGCAACTGGAA…	gz_contig_4874	100	1526	gi|226501850|ref|NP_001146398.1|
aj_contig_346	AGGAACGCGTTGACCGGTGCAGCTCGTCTCGGTCTCAACACAAGGCTCATTTCCAAGGTGGGCAACGATGAATTCGGAACAACTGTTCTTCAAGAGCTAAAGGAGACTGGAATTGATATATCTCATGTTATAATTTCTGATGATGGGAACACAACATTTAGCTATGTCATCATTGATAAGCAAACGAAAACTCGTACATGTGTAATCACATCAGGCCCTTCAATGGTTCCTAGAGATTTATCGATGTCAAGTTTGTCAGATGCATTACAAGATGTAAATTTGTTATTTCTAGATGGATATCAACATGAGATGGCAGTGGCTGTTGCTAGGAAGGCTCATCAGGTGAAGATTCCAATATTGGTTGATGCAGAGCCAGAAAGAACAAGGGCAGAATTGGAG…	gz_contig_18933	100	431	gi|13489170|gb|AAK27804.1|AC022457_7
aj_contig_347	GCGTCCCTGGCGACGAGATTTGTGCTAGGGGACAAGCCATGAACCACGCAACCACCGGTTGTTAACTAAGCAAGTCACTCTGTAAATTGCAAGCAACCGGAGCAAGTCACAAGCATGGTGTTCCAGAAGCGGTCGTCCTCAGAGATGGAGTCGTGCAGGGGAAGCCAAGTCGCGGAGATGCCGCGCGTCCCCAAATTCGCGAGGGGCAAGAGATCGGCCCGGAAGAAGGAGGTTCAGAGCCAGGGGCAGATGATGTGCGCATTTGACCTTCTCGCGACGGTGGCTGGGAAGCTGCTTGATGAGGGTGAGGGCTCGCTCGGGAACATGAGCGCTGGCGCACAGACCTTGGCTGCGTGCGACAGTGGTGCCCACGTGAAGCAGGAGCAGTGCGATGAGGAA…	gz_contig_5756	100	2390	gi|224030863|gb|ACN34507.1|
aj_contig_348	AAAAAGAGTAATGATGAACTGCCATGATAATGTTCCTACTACTATAGATGGTATAAGGTCTGACTCAAAAATGCTTTACCCAAATCAAGATACTACATAGTACAAACATTGCGAATACAGAGTCCAACTGAGTTTAAAGGCACGGGCATCGTCTAGCATAGATCGATTTTGTTTGCCCCATTACTGCCAATTACCATACTGTTGCTGATTGCGAGAACCACCTTGACCATAGTTCGGCCCTCGGCCTGGACCAGATGCACCATATGGGCCACCTTGTGGGAAATTTGGTGCACCAGCTCCATAGCCACCGCCTCCGCTACCGCGCGGACCACCACCAGGGTAAGGAGGAGGCCCTCGTCCTTGTTGCGGATATGGGCCACTTCCATATCCACCACCCTG…	gz_contig_3556	100	1529	gi|242038283|ref|XP_002466536.1|
aj_contig_349	GGGGGGTTCTGAACTTTTCTTCTGTGTCGTTGAGTTTATGCCATAAATCAGAGGAATGATGGAAGATTTACAAAATTGCAACTGGAACGGCCTGGTTGCTGTTCCCAGCTCTGTGGTTCTGCATCTCTTTAGGATGTTTGATCAGCAGGATCAGCATTCCTGGGAGAAGTACATTCTAGCTTACTCCTTTTTGGTCAGGAACGAGTACTTCACAAGTCATTCGAAGGAGCACTCTGATGTGAATGGACAAAATGGCTTTGATATTTCAGAATTAGGTGTATATTTTTCATTTGCTACAGATTGGAACAGTGAAGAGTTGGAACTGCAGAAGCAGAAACCTGTTCTGAACACTCAGTCTGGAGGCGATTCAAGTGGCAACGGATCAAATGACTGTTTCTT…	gz_contig_8389	100	1526	gi|226509066|ref|NP_001142058.1|
aj_contig_350	CGTCGCGCCGAGAGGGTGATTCTGAAGTTTTCAACCTGTGTCTTCGAGTTTCTGCCATAAATCAGAGGAATGATGGAAGATTTGCAAGATTGCAACTGGAGCAGTCTGGTTGCAGTTCCTGGCTCTGTGGTTCTGCATCTCTTTAGGATGTTTGATCAGCAGGATCAGCATTCCTGGCAGAAGTACATACTAGCTTACTTTCTTTTGGTCAGGAACGAGTACTTCTCAAGTGACTCGAAGAAACACTCTAATGTGAATGAACAGATTGGCTGTGATATTTCAGATTTAGGTATATATTTTACATTTGCTACAGATTGGGACACTGAAGAACTGGAACTGCAGAAGCAGAAACCTGCTCTGAACACTCAGTCAGGAGGCGATTCAAGTGGCAACAGATCA…	gz_contig_8413	100	1556	gi|226509066|ref|NP_001142058.1|
aj_contig_352	TACTTACTTGAGCCCCCTCGGCCCTCGCTTTCCTTTTATCTCTGTCATCGAGGCAGTGGCGGAACGGTTGCTCCACCTCCACGCCGCCGTCAACTTGACTTGCGCTGCATCATCATCGGCGGCAGGAGCAGCCTTCAAGCAAGGCACTAGCTACCGAGCGGTAGTATAAAGGCAGCAGGAGGGGAGGCGGAGGAGGAGGGGCAGGCGGTACAGAGTCCTCGGAGGTTCTCCATCCGGCCTGGCGAGGGAGAGAGGGCCAACGGGAACAACAAGATGGGCGTCAACCAGCTGCTGCTGCTCTTCGTCCTCGTCGTCTCCGCTGCGGTCGCCCCACAGGTAGTACGAGCAGTAAAACCAATCCCGAATTCCATTGTCAGGGTTACTGATAGAGACAATTCC…	gz_contig_4907	100	1250	gi|59895951|gb|AAX11351.1|
aj_contig_354	TGTATTTCAAAAGCGACACATACAACTACGACATTACAGCATATTTATTCACGATTCTACAGGAACAAAACGAAATAATGAAACCACATATGATTGGAGCTCTCGAAGCTACAAAGAGTGAGTGAGTATAACTAAACACAAGATCTTAATAACATACAAAACTCGGCAAATCATAGCCATTCCTTTGGATTCTTGCAGGCGTCAAGAAGTTTCCACTCTTCAGTACCTTCTTCCGGTGTATGATCATACTGCCACCGTGCAGTAAGGGGAAGAGACACCAGTATACTCTCAATCCTTCCTCCAGTTTTGAGGCCAAATGTGGTGCCGCGATCATATACAAGGTTGAACTCCACATAGCGACCTCTCCTCAGTTGCTGCCACGCCTTGTGATCCTCATTG…	gz_contig_2221	100	848	gi|308081433|ref|NP_001182775.1|
aj_contig_356	CGGCCCCACCTCGCCTCTCTCCCGCACCTGCCGGCAGCCTCGACCTCCCCGTCGCCCACTACCCGCGGTCACCGCTTGCTGCCCACCCAGCTCGCTCTCTCTCGCGCGCCCCCGCTCCCCTGTGAGTTCTGGTTCTTGGTTAAATCCATCGTCACATTCCTCGCTCTCAGCGCGCCGCCCCCGGCNNNNNNNNNNNNNNNNNNNNNNNNNNNNNNNNNNNNNNNNNNNNNNNNNNNNNNNNNNNNNNNNNNNNNNNNNNNNNNNNNNNNNNNNNNNNNNNNNNNNNNNNNNNNNNNNNNNNNNNNNNNNNNNNNNNNNCCCCGCCGCAGCTCTCCCCAACCCCAAGATTCCGACCGTCCCCGTCCTCCTCCTTTCTGCCACGGCCGCTGGCGCACCGGC…	gz_contig_1062	99.72	2120	gi|242053735|ref|XP_002456013.1|
aj_contig_358	CCGCAGTGTAGTATGGTATTTATAATACAAGGCTACCCCGCCCATAACAGTAAATACACAACCTGATTGGTATATCAAAATGTTCTCTCGAGTAACACAGGTTTGGCATAAGTCTCGAGATATACACATTATGTCTCCAGATATACACATTATAGCATAACACATAGTACTAATACAGCCTGATGCACTTCATTGCATACATTGTCGGATCACGATTAAGCACATTATGGGATGGTCCTCTGGTAGAGAGGAAGTGCTCCCAACGCTTCACGCTCTGCACTCTCCTTTTTCACAAGAGCCAGCATGTCTGAAAGGTAGCTCCTGAAAGGTGTCTGCAAGGCCTGGACGTCCTCGGGTAGGTACTGGTGCTTCATGGAGAGGTCCATGGCGCGCTTGAGG…	gz_contig_13357	100	413	gi|115471095|ref|NP_001059146.1|
aj_contig_361	CGCACACACTGTCGAGATCATCTGGACGGTTCGCCAACCAGGACCAAGCATGCGCTATGCTGTTAGGCCCGGAACTACTCCCATGTTCGATTACACAGCACAAAATCCATGAACTCGCTCATCCATGAACTGACTTCCCAAGCAATTGTCCAACTACGTTAGCCAATCATATCAACCACAGCCATCTAGTCTCCCAGTGAACATATTTGCGGTGGCACCAGCGCACGACAAATTGTAGGGAAAACAACAAAAACTACCCACTCTCTCTCCTGCAATGGCCTGGTAGAAGATATCTGAACCGGTCGACATTTTTTAGCAGATAACTAGGAAGATGAACAGCAGAAAATGTACTTGGGATCGGCCCCAACTTGGCGATGATTTCTTGAAATGTGTACTCCT…	gz_contig_7890	100	974	gi|115458974|ref|NP_001053087.1|
aj_contig_362	AGGAGATGAAAATCCAGGCATCTCCAGCATCGGGAGGTCCATGTGCAGCCCCCATGCTAGGAGATTCAGTGGACAAGGCTCCAAGCTCACCTTGGATGCCCTTTTCTATGTTGTTTGCTGCAATTTCAACGAAAGTATCTCCTGACAGTATGGACCTTGTTGTTAGTTGTTATGAAGAATTCAAGAGCAAGAAAATAAGCCGAGCTGAACTTGTCAAGAAGCTGAGGCAAATAGTCGGTGACAGAGTGCTGATCTCGACAATAATGCGGCTCCAAGATAAGCTGCCCCCAGTGGGAAGGCATGATGCATCAGCCAAGATGGAGAAGCCGTGAAGTCTGTTGGGTGGGCAAGACAAGCGAGAACCAACTGGCCGACCTGACAACCTTGGAGGCAACGATG…	gz_contig_8982	100	434	gi|413934482|gb|AFW69033.1|
aj_contig_363	GGTATTTTCAACTGTTACCCAGACTTGCAACTACATGAACCAATATACCGCTACTATATAGATGGTCCATACTGATAGTAGTGTCTCTCATGACAACCATATGATAACCATACTATTAACCAACCCACACTTATTGTGATAATTACTGCTAATAAATGAATGGATTTGCTCTCTTCTCGTACAGGTCGAAACCCAAATTCGGGTTCTGATGATACAGGAGAAGAGAAAAAATCTGTACATCAAGTGTGCATCAATGTACTTGAGGTGCATCCCTCAATGTTACATTCAAATTGGTTTCCACTGTTTGCCACCCAAGTCGAACTTTGCTTTGCATCATAGCTACGAATTCATCGAAGTCAATCTGACCATCATTATTTTGGTCAACCTCTAAGATAATCT…	gz_contig_2027	100	1676	gi|242042385|ref|XP_002468587.1|
aj_contig_365	TACGGATCAGCAGTTGCAGGGGTTGCACTTGCAGTTGGCGCCGCAGCCGCAGGCGTGGGCGGTCTCGCCGGACTCCGTCGCCGCCTCGAACTGGGCCTTCTGCTCAGGCGCCACGCCGAGGACGACGGTGGCCTGGGCGGCGGTGCTCTTCTCCTCGAGGTCAGGGTACATCTTGCCGCAGTTGCAGCTAGAGCCGCAGTTGCAGCTTGATCCGCAGCTGCACGACATCTTCGCTGCGACCTAGCTTTGACAAGTGCTAAAACGGAGCTCTGGATGCAAGCAAGGAGATATATGATTAGCTTGTGTCGAGCGCACTGCAT	gz_contig_3532	93.1	173	gi|47132403|gb|AAT11797.1|
aj_contig_366	GAAGCGACGATGCGCAAGTGGGCGCTCTCCTCCGCGCTGCTCCTGCTCTTCCTCCTCACAACACTCCCAGATCCAGCTAAGAAGCTTCAAGTGAATGCCGAGGAGAGCAGTGATGACTTAGCCAACCCGCCAAAGGTAGAGGAGAAGCTTGGTGCCGTTCCCCATGGCCTGTCCACCGACTCTGAGGTTGCCCAGAGGGAAGCCGAGTCAATTTCCAGGAAGACCCTCAGGATTTCGGCGGAGAAGTTTGAGTTCCAAGCTGAGGTGTCCAGACTTATGGACATCATCATCAACTCACTCTACAGCAACAAGGACATCTTCCTGAGGGAGCTCATATCCAATGCCTCTGATGCCTTAGACAAGATTAGGTTCCTTTCGCTCACTGATAAGGAGGTTCTT…	gz_contig_1432	100	1349	gi|413943118|gb|AFW75767.1|
aj_contig_367	CTCGTGCAGATCAGTTCAGTAAAATCTAGTGCTTGTCCGGAATTTGGTTGCTATCTAGTATCTACTACATTTTTGGATTTGCCCCAAGGCCCCAACATACAGAGAGCATCCAAAACTGACAATGTCTATTACACAATTCCTCAAGAGGTAGTGCCATCCCTCTTCTCTGAGAATGAAATTTGATCTTATAATTTAGCTTCAGGACAACTTTGTTCTCACAGGTCCATGTACATAAAGGTAGAAGCGACTACACATGGCCCGGCAAATTCATAGCAGGGGACAGCATTACTCTTCGCCAAATCTAATTCCAACTTATGTAACTGAAGAAAAAGAAAAATTAATATCCTAAGGTGTGCAGAGATTCTTCAGGTCTTCTTCCTTAGCATAGGTGTTTGGAAT…	gz_contig_10638	100	1016	gi|115480363|ref|NP_001063775.1|
aj_contig_368	ATGAACATGTGATTCCTCAATACAATTGAGAAAATTAAATGTTACAACATAGAAACATCCTCAGGTTATTCCCAAACTTGGCTAATGGAAATGAAGCACAATGAACAATAGTGTCTACTTCAGTTTTGACTTGGCAGAACTTTGAAGTGGCTTAGAAACAGTAATTGGAGGACTACTACTTGCCGTCTTCTTTACATTGTACGTTATCGACATGAATGCACAAACCAGTGCAATCATAATGGTCGGGTAGACATAAGCTGATTGTGCTGGATCGCTGTTCACTGGTTTCCCAAATAGAGCTTCTTTCACTAGTCCCCAGACAACCAAAAGTGTACCAAACAAAGTCATCCTCCCAGGATTTATGATGCCGACGAGTGCTCCAGCAACACAGAAGTAGCT…	gz_contig_12696	96.94	587	gi|242053259|ref|XP_002455775.1|
aj_contig_369	TAGGGTTTTCTGCGATCCCCAATCTCTGTGAATTTACAGATGGCTTCATTACAGCATGTTGAGGTTGAAGCGGCAAAACTTCTTCACAAGCTTATACAGGAGTCCAAGGACGAGCCTATTAAATTAGCAACAAAACTTCATGTGATATGCCAACATATGAAGCTAAGTGGAAAGGAGCAGTCATTGCCATATCAGGTCATATCAAGGGCTATGGAGACAGTTGTAAACCAACATGGAATTGATATGGATGCACTGCGATCATCACGAATTCCATTTGCCGGTGGTCAACAGGCAGGGGATTCCAGTAGTGCTTTGGCAAAGGACAGAGAGATCATTGGTAGCCAGGCTCCTGTGATTGCGAGTGATGCATCCCAAAGTGTTGGGCAAGGTGGATTGTGG…	gz_contig_1846	99.72	5453	gi|52076407|dbj|BAD45237.1|
aj_contig_370	ATAATATTAATTTTATGTATGCAGCAACGCACAATATTTTGTCCTAAAAAATAATTGGAACAAAAAAAAAGTAAAACAGCTCGAAATTGCATAAATTAATAGATACACAATGTCTCTTCCATTGTTTACAGAAATATTTTTCCTGACACATTATTGGCACATCGATTACGAACGTACTCTAGTTAGATTCGAGCTGCGCGTACCAGATCCCCTGGATCTTCACATCCTTGGGCACCTTGGCTCCAAGGTCGGTGTCTGACGGCTGCAGGCTCTCGAAGACCCCGATAACCTCTCCAGTGTCCGGATTGCTCTTGGTCACGCTCAACGTGATGTTACCCGTCGATGACGCAGTGTTCTTAATGTTCTCCTTCACGAGCTCCTCCTCATCTCCTCTGCCTC…	gz_contig_6295	100	1079	gi|413934662|gb|AFW69213.1|
aj_contig_372	CCCGGGGCCATCATGCATGCAACGACGACAAACTAAGTTACGCCTAACATTACAACTAGAGCAAATGTTGCTAATATCCCTACCAACTACATGCATAGTCATACGGCAATCCAAACGGCAACTTAACCCCAAGTTACAATTCATAGACGATGCACTACCAAACACCTTTTGGACTACACAGAGCCAATCTAGGAAGCAGATGCATTTACAAGATGCAATCATAGGTGGCTAACTCAAGCCTTTCTTCTGCGCTTCTTCCCAGTAGAAGCATTTGCAGAAGCCTCCTGCTCTATATCCGCTGTCTTGCTTTCATTCTCCTGCTTCTCTTTGTCAGCATCAGTCTCTACAGGGTCACTGGCACTCTTTGGTTTACGACCTGGCCTGCCTTTTCCTTCAGTG…	gz_contig_686	100	1670	gi|293336952|ref|NP_001169289.1|
aj_contig_373	CGAGAGCAGCTGCAAACCAGAGAGATGGATGGAACTACATACGAACAGATCGATCGAGCTGGGAGCAAGAAAGGAAACTACATGAACCCTAAGAACTCGGACAGGCACACGCGCATCCTGACCGATCAGTTGATCTCACTCACACATAGGAGCAGTTTAGTGCTAGTTTGCATCGATCCATCAGCACTAGGCAGGCAGGCACCGGAACGTGTCAGGTTCTTTTGGTGATGGCGTAGATAGCGTAGATGATCCCCGGGAGGTACCCGAGGAAGGTGAGCAGCAGGCAGATCCAGAACTCGTGCCCGCAGCCGAACTTGAGGAAGACGCCGAGCGGCGGCAGGATGATCGCGATCAGGATGTCGATGCAGTTCGCCGTGCCTTCGTCCGCCATATCTGGTC…	gz_contig_2954	97.67	386	gi|288300156|gb|ADC45381.1|
aj_contig_374	CGGGAGTGACACTGCTGAGTCTGCTTTCAAATGTTATGTCATTGAACTGTGATGGCATTCTTCAGCAACTCTGGGAGCAGGGCTGATTTGGGAGGATACAACTTGAACGAGAAGGCAGAGGATGAGAGCGCCTATGAGTCGGTTAAGGATGATGAGGTTGACTTGAACTCTAGGCAGTGGAACTTAAACGAGAAGGCTGAGGACTACCACAATGAAGAGGAGCAATATGAAGGTGGCCAATCAGGTCTGTACTCTTCTGAGAACACATCTGCCCGTGGAGGAGGTGGATCATCTGGTGGCCCATGGGGTACCAACTTTTTGAAGGATTCCAGATCCAAGCAGATGGCTGAAGTGCCATTGAATAGTGCTAGGGGAATGGAAGATGGGTCTGCTGCTAGC…	gz_contig_6982	99.77	2642	gi|242051170|ref|XP_002463329.1|
aj_contig_375	TCAGCGTCTCCTCCTTCTCCCCATCTCCCCGTCTGCTGTCTCCCTTTCCCCGTTTGCAGGTTACCAAGTCGTCCTTCGTTCTTCCTACTCCAGTTCTTTATATGTGGCCGCATCCCTTTTTGCCCGTCTCGCCACCATCATTCCGAGTCGCTGTCCATGCTTTCCATCCCTTTCAGGCCCCTTCGCTTCTTCTTCACGCATTTCTTCTCGCGCACCTCATACCGGCCTTTGGTCAAATCTGAGAGCCACATCCCCGGGAAGACAAACTGGAGGCTCTTGTCCACGATTTTGGCACGCTTCTTGGGCCGCTGGGGCAGCTTGGTTCCCTTCATGGCGAGGAAGTCGTCCTCCTTCTCCTTGCGCGACAGCGAGATGTAGATCCGCGGCAGCTCGAACCGC…	gz_contig_10568	100	317	gi|115439191|ref|NP_001043875.1|
aj_contig_376	CCAAGCTGCCCCAGCGGCCCAAGAAGCGGGCCAAGATCGTTGACAAGAGCCTCCAATTTGTCTTCCCGGGTATGTGGCTGTCAGATTTGACGAAAGGCCGGTATGAGGTGCGCGAGAAGAAATGCGTGAAGAAGAAGCGAAGAGGCCTGAAAGGGATGGAAAGCATGGACAGCGACTCGGAGTGATGATGGCGCGACGGCGACGGTCAAATGAGACAGCCAAAACGGGGCAGTAAGACGGGGATGCGGCCAAAGAAAAGAAGAACAACGACGACGGGTTGCTCGCCAATGGACAAGGGGAGGGAAAGAG	gz_contig_10559	100	197	gi|300681461|emb|CBH32555.1|
aj_contig_377	CTGGACAGCCAGCCTCATGAATCTGGCCGCCTTCCCGCACCTTGCCACGCCTTCCACCGCGACCGTCCCCCGCCATGAGATGCCATTAAAGCCTTCCCCCGCTCTCTCCCGCCGCTTGCCTGCGCTCCGCCGCTCGCTCTTCTCGTCCCTCCGGTGGGTCTCCCCCATGGCCTCCGCCGCGGCCCCCACCTCCGCGCCCGCCNNNNNNNNNNNNNNNNNNNNNNNNNNNNNNNNNNNNNNNNNNNNNNNNNNNNNNNNNNNNNNNNNNNNNNNNNNNNNNNNNNNNNNNNNNNNNNNNNNNNNNNNNNNNNNNNNNNNNNNNNNNNNNNNNNNNNNNNNNNNNNNNNNNNNNNNNNNNNNNNNNNNNNNNNNNNNNNNCGCGAAGCCGGCGGAGCAACA…	gz_contig_2517	99.75	1202	gi|357158717|ref|XP_003578218.1|
aj_contig_378	GGAGGGTGGGGGCCCATCGACCGCGACGCAGCTGTCGACGCCATGCTCGCATACGCCGACGCGGGTCTCACCACGTTCGACATGGCCGACCACTATGGGCCTGCAGAGGATTTGTATGGCATGTTCATCAATAGAGTCAGGCGGGAGCGCCCACCTGAGCTACTCGAAGAAATCAAGGGGCTTACAAAATGGGTACCACCTCCTGTCAAGATGACAAGAAAATATGTTGAGGATAATATCAACAGATCTCGGAAGAGGATGGATGTTGCTGCCTTAGATATGTTGCAGTTCCATTGGTGGGATTACTCAAATCCTGGATATCTAGACGCGCTAAAGCACATCACAGACCTGAAGGAGGAAGGCAAGATAAAGACTGTAGCTCTGACGAACTTCGACACA…	gz_contig_13076	100	1034	gi|242043918|ref|XP_002459830.1|
aj_contig_379	ATCTCCTAGTCCTAGCTGTCGTATTTCATGGCTATGGTAACGTAGCATATGCTACATACATCTAAACAGTTCATTACAGCTGATTCAGCGATTCCACACCCAACCCTTTGATTCAGGGCGTTCATAGCAGGTATGCATTTGCTGCAAGAAAAGAATTTGACTATTCTGTACCCAAAAGAACCTGATCTGATTGACACCACTCTTGAGTAATTATCCATTCGTCAAATATTGGGTGTGTTTGAAGGATTTGGAAAGCAACATGTGGCCCAAATGGCACTAAAACCAAACATCATTAATCCCTGTGCTTCGCAATAAAATTGGCATCAACTTTGTTCCCTCAGAAAGGTGTGTTCCATTGGGTTCTGCTTCCCTCAGCTCGCCTTCTATTCATTTTGAGTC…	gz_contig_143	99.23	1163	gi|357118918|ref|XP_003561194.1|
aj_contig_381	GGAGGAGCGAGGGAGGATGCTGAGCGTGGTACGGGTGCACCTGCCATCGGAGATCCCGATCGTGGGCTGCGAGATCACGCCCTACGTGTTGCTGCGGCGGCCTGACGGCTCCATCTCCAATGATGACGTGCCTGAGACCTTGCCTGCTGATGGACAGTTCATGCGTTACAGATGGTATCGCATACAAAGCGACCGGAAAATCCCTATCTGCAGTGTACATCCAATGGAGCAAGCTACAATACAGTGCCTAGGGTGTGTCAAGTCAAAAATACCTGTTGCTAAGAGCTACCACTGTTCAGCTAAATGCTTCTCTGATGCATGGCAGCACCACAAGGTTTTGCATGAGCGAGCTATTAGTGCTTTGAATGAAAATGGGGCTGAAGAAGAGGAGTTATTTGG…	gz_contig_2120	100	1580	gi|226509154|ref|NP_001146094.1|
aj_contig_382	GGCCAATTTGTTGTCGCAAATGGAGATTACATTATTGACTCCCTTTGCAGACAACTGCGCCACTTGGATCTGAACCCCCGTGTCCCTGATATTCTTGCTTCGATGCTGAGTTATATTGGTGCTTCTCGTGATATTTTACCTTTCCTAGAAGAACCGATGCGAGCGGTTTCCTCAGGATTGGAGGNNNNNNNNNNNNNNNNNNNNNNNNNNNNNNNNNNNNNNNNNNNNNNNNNNNNNNNNNNNNNNNNNNNNNNNNNNNNNNNNNNNNNNNNNNNNNNNNNNNNNNNNNNNNNNNNNNNNNNNCTTTCCTGAAGGCGGTTTCCGAGATTGCCAAGGCATGTGAACATGAATCTACTCGGTTGCCAGAAGAGGCTCAGTTTTTCTATGGGAAGGTCAGCT…	gz_contig_15842	100	815	gi|18266652|gb|AAL67598.1|AC018929_20
aj_contig_383	CCGGGGTTAAAGTGGGGTCCGCAGGGGAGTCCTAGGAGGGGGGAAAAAGGGATCTGACCGGGAGAGATGAAGATTTCGGCTTCCTCCGCTGTGACTACTGCTAACCTCTTCCCTACTACTACTAACCCTAGGATCACTCTGCCGTTTCTCCTTTCTGATCGTACTCTTTTTAGTTTTAGCCTTGTTGATATGGAAGTTGGGTACCTTCAGCCACTTCTTTGTTAGATTAGTGTACATAGTAGCCTTGTTCAGGTTTCGTTTGGTTGGGAAAAAAACTCTGTGGGTAGTATTCATTACTCCTGGCAAAAATGGCTGCGATGAACGAAAAGGTATTGGGTAAATGTGGAAGGAACATAAGTGGTCTCAAGAGAAAGCGAGACAGCCCCGCTGCAAACCATG…	gz_contig_4614	100	1634	gi|414867931|tpg|DAA46488.1|
aj_contig_384	AGCTTTACCTGGCAAACTCAAGGCTAATGCCAAAAGGCCCAAAATACATCTGATAAATGTCCCAAAATAATCAAGCGGCTGGCATGCCCAAACCACGCAGGGCAAACGCCTAAAGCTCACTAAATCCTAAACAATGAAAATTATCTATGATCTTTTTTAGGTGAAAAATACCTATAATTAATAACACAGCCAACATTGATCCAAAGCGACGTAAAAACCAAATCAATGAAAATGGTACACATCAGATAACTACTGATCCATTCGCATGCCAAGAATGCACTGTGCGAGATGCGTCAGGTATGGTTCTGCCTGTGAACTGCTGCTTAGTGTAGGCACAAGGCTTTGGAGCTCTGAATTGAATGCCGCTTCAAATTTCAGTATTGACTCTGACATCACAAC…	gz_contig_3370	100	959	gi|226501920|ref|NP_001141911.1|
aj_contig_385	CCTAAGAGTTACAGCCATCTTAGCATATGTACTTCAGGAGCCATGGGTGTTTCCTCGGAGTTATTGAACAGTTCTTAGCCTCTCTTCAGCCATTCATTCAGGGCTGAGTTTGTCACCGGAAGTCACCAGCCCGAATCCATGCATACACGCTCTAACGGCTTCGGGTCCAGAAGTAGACCATTTCTAGCCACGAAGCTTGGTGGATTTAGTCACCACCATAAAGTCAGCTATGATTTCATAAATGAGATCTTCCTGCAAAGCATTCCCAATATCACTCCCGATCAAGTAGGCGCCATCCTCAGAACCAACCCACTCTAAATCAGAATATAGGCCTTCCTGATTAAACTCCATTTCTTGCCTCAGCTGGACCACCTTACGCCACACCATCTCAACAAACTC…	gz_contig_11106	100	1010	gi|242041353|ref|XP_002468071.1|
aj_contig_387	CCCTAGATGTCATTGTCATGGCTATGGTAATGTGGCACATACTACATACATCTATAACAGTTTATTCAAAGGCTATGCATTGCAGCAGATTCAATGATTCCACACCCAACCCATTGATTCAGGACGTTAAAAATCAAGTATGCAAATGCTGCAAGAAAAAAAGAACTGACTATTTTGTTGCCAAAAGAAGCTCGTCTGATTGACACCGCTCGAGCAATCCATCCATTCGTCAAGTACTGGGTCTGTCTGAAGGATTTGAAAAGGAACATGTGGCCCAAATGGCACTAAAAATAGCATCATCATTTCTTGTGCTTTGTATAAAATTGCCCTCAACTTTGTCACCCCTCAGAAGGAACAAGTGGATCCATCGGGCGTGTGCTTCCCTCAGCTTGCCTTCTA…	gz_contig_148	100	2471	gi|115466360|ref|NP_001056779.1|
aj_contig_388	CAACCACAAAAAATAAAGTTGATAAAGACCTAATAACACATTTTCCTCTTATAGATTTGGAGATCAGCTGGGAAAGGTTATTGTTCTATACCCTAGGCCCTAAATGACTAGATAAGGTAAACCTTTTTCTATTTCAAGGAAAACAAAGTTGAGTTGCTGGCTGCTTGAAAGTTAAAATAAAAATGGCCGACAACTCTGTCTAAGTATTCTACTTTGTACTTGCTACCCCTGGCTGATAGTGCACGGATTTATTCCCTATGAACTCCCAAAACCTAGAGTCGCATAAAGCTCCCTGACGAGAATTCCAGTCACTGCCAAAATATCGCTGGGTCATCACTGTAAACTGCACGATCCTGGATCTCTAAGTTAGATACATGCCAATCAACAAGCCTTGCTTGA…	gz_contig_3082	98.47	2354	gi|357129638|ref|XP_003566468.1|
aj_contig_389	CCTAGCTCGTACAGCCTCAATCCCCAATCCGCCCTTCCAATCTCGTAGAGCCTCGAGCTAGGGTTGCGTCCTCCTCCTCGGCGACCGATTCCGATCCACCTGCACCCCATGGCGGCCGAGGGCGAGAAGAAGATGATCACGCTCAAGAGCTCGGACGGCGAGGAGTTCGAGGTCGAGGTGGCCGTGGCGATGGAGTCCCAGACCATCCGTCACATGATCGAGGACGACTGCGCCGACAACGGCATCCCACTCCCCAACGTCAACTCGAAGATCCTCTCCAAGGTCATCGAGTACTGCAATAAACACGTCCACGCCGCCGCTGCGGCCGCCAAGGCCGGTTCTGACGACGCCGGCGCCAACAACAGCGCCGCCTCCACCACTGTCGCCTCCGGCGAGGAC…	gz_contig_1093	100	467	gi|297728323|ref|NP_001176525.1|
aj_contig_390	TTGATGCACTGGTATCTAGTCAGGATCTACTGCTGGAATTTCTTGAAAAGATTGAACCTGTTGTCCGAAGTGACCTTCATCATCATGGTTCTCCATCCTCTACTGCAAACTGTATTACAATACTGAAACCAGCTAGAAGAAATCAAGTTGCTGGCATGGACACTATTTACCCTCAAGGTAAAGAAACTGAAAGCGACCTCAACATGCAGAAAGAAGCGAAAGATTCATTAAGGAAGCCATATTCGAATGTGTCCTATCAATGCCAAAAAGAAGATTATGGTTCATTGAAGCAGAAGATATCGAGGTCAGGTAACCAAGAAAACACCAACAGAAGAACTTGTCCCACTCAGATTGTTGTCTTGAAGCCATGTCTTGACAAAACTCGTGATATTGATGGAG…	gz_contig_7681	100	2342	gi|242041353|ref|XP_002468071.1|
aj_contig_391	CAACACGTAGTCCTTGTATTACAAATACAAAAGGAAAAAAAAAGACATCTTATTGTGGATATATTTACACAAGAGATCACCTGGCAGTCCGATACACGTAGTAATAACTTTACACGTGCTCTAATCGCACTAAGCTTTTACAAAAGGAGCACATGTGAAGATCCAGGTTACAGCGGACCTCTGCCACATGGTCGCTACAGCCTGTCACATGCTCATTCCTGTGACGACTTCAGGGTGGTAGTGTAGCATCTCCTGCCACATCATTTCTCTGATCATTTCTACTCCAAGATTTTCATCTATGTCGAGGTCGATGGGCACTTGAGCTGGAGGGTTTGCACTTGGATCATACAGCGGAGACATGTAAGGGTGCTCCAGAGCCTCGGTAACGCTAATCCTTTT…	gz_contig_4731	100	1325	gi|115469744|ref|NP_001058471.1|
aj_contig_392	AAGTCCTGCGCCGGTGTTTCCTTGAAGACACAGGAGTTATATGCTCTTGTCTTTGCCACTCGCTACTTGGACATATTTACAGATTTTATATCCCTTTACAACACTACCATGAAGCTGATTTTCCTGGGTAGCTCATTCTCAATTGTTTGGTATATGAGGCGCCACAAGATGGTCCGCAGGTCATATGATAAAGATCATGATACATTTCGACATCAGTTCCTCATCCTACCATGCCTTATATTGGCCTTGCTTATTCATGAGAAGTTCACTTTCACGGAGGTAATGTGGACATTTTCAATTTACCTCGAAGCTGTTGCCATCCTTCCTCAACTTGTCCTGCTGCAGCGTACAAGAAACATCGACAATTTAACTGGGCAATATGTATTTTTGCTAGGTGCA…	gz_contig_8784	100	884	gi|115457968|ref|NP_001052584.1|
aj_contig_393	ACGGCCCCACCGACGTGTTCGTGCACGACGTCGACCGCCCCGTCGAGGACGCCTTCTCCAAGGCGTTCCTCTGCGAGGCCTACCTCGAGGAGCAGGTCGGCCGGATCCGACACTTCGTCATGCCTAGCCACCGGGAGAAGGACGGCACGCCGTTCTGCCCGTGAGGAGACTTACACGACTCGATCTCGGCGGCGTTGCGTTCTCTGTTTTTGCGTTTGGTTCACAGGGAAAGGATACACACCACGGACGGGACAGACATCCGTCAGCAGCCATATCTTGATTTGTTTCCAAGCTCTATCGTTCCTCCTGCCTGCGCAAGGTTCTAAAACGTCAATTGGATTACTTTGCAGTGCTTGGATGTAAATTACTATACTCCTTAATTCAGTATTCAGGAGAGTG…	gz_contig_18618	100	422	gi|242085188|ref|XP_002443019.1|
aj_contig_394	GCTATTGTTATTGTTATGCTTGATGAATATGATCAAATATTTGATGAGCTGGAAGAAGGTTCCTGTTCTTCAGATGCTTATACTGATTCTGAGGACGATGATGTTGACAAGGAATATTCCACAGATAATGACTTACATGATGAGGATGGTTCTTATAATTTTGGTGAAGATGAGATTGACGAAGAGTTGGATGACAACAGTGAGCACTCTTCTAGTAGCAGTACACATGACAACAACACTAGGACTGTTGTTACAGATGATAAGGTCAAAACCAGTATTGCGGCTGCTGCAGGTAATGCAAATAATCAAGCAGTTCAGCCTCCTAAAAAGGTAGCAGGAAAGGATAATGATGCATCAATGGAAGAAATTGATCAAGTTTCTTCTGTTTCGCTTAATTCA…	gz_contig_22352	100	149	gi|357113049|ref|XP_003558317.1|
aj_contig_395	TTTGCTAATTCCTACAATTTATTGCTTCCCTTTTCAAAACGGTTCCTAATATCAGCAGTAGAGTACAGTACATTACATTACATGACTCCAATTTTCCGGATGATCTAAATCTTGGAGTTTGTAGTACGGTAGTACCGTGCACTGTAAATCCTCATCTCTATGTTCGTGATTTTGGTGCTTATTTTTCATCTGTAGATAGATCGAATTCGATGGAAACTTTTCTATTGTGTGTGTGCCAATCTGCTTCATGCTGGTTAGCTTCTTGCTGTTATCAATTATCATAACGTTCAATCGGTTGTGGTACTGTTGAAGCCATGGGATCGCCTCGAGTACTCTTTTATGAGCCTGGAGAATTCGGAGTTCTTGTTCTCCAGTAATTTTGATGGTGTGTCATATTCT…	gz_contig_2475	100	4853	gi|414585697|tpg|DAA36268.1|
aj_contig_396	CTTTGCGGTGCAAACGTCAGTGCTATCTACTGTAATCATGTCGTCCATGGCTCCAGCCTCCTCCATGAGAAACTGGTGGCTCCATCGAGTGCCTGGAAGGGGGAGGGTACGTTGATCTTATGTCAGGCATAGACCACCCAGAACATGGACCAGGTGGAGGATCCGATGGTCGTCCACAGTGAAACGGGGGTTGCCCTCCAAACTGGTCTGGAAATGGGGGACCTGGTGGAAAGTACGGCGGAAACCTTCCTCCCTCCNNNNNNNNNNNNNNNNNNNNNNNNNNNNNNNNNNNNNNNNNNNNNNNNNNNNNNNNNNNNNNNNNNNNNNNNNNNNNNNNNNNNNNNNNNNNNNNNNNNNNNNNNNNNNNNNNNNNNNNCCTTCCTCCCTCCATACCTTCAT…	gz_contig_1928	99.59	2960	gi|222637596|gb|EEE67728.1|
aj_contig_397	GCACAATACTTCAAAAATCAAAGCGTCAGTATTACATTTACAGACACAGGGGGAGCACAGTACTTGTAAAAATCCAAGCATCACCATTACATTGACAGCACCAAGTGCAAATTCAAGCAAAGTAAACAAGCTGACTACATCCTCCTAGTCTCCCTACTGCAGCAGCTGCAGCCATCCCTTCATCAAAACCTGTAGGCGCTGAAATGCTTCACCCTGAACTTCCACTCTCCCTTGGCAGCATCGAAGGATACAAACTCTGCTCCTTGCTCCTCCGCCTTCTTCACCAGCATCTCCTTGTACTTGTCCACCCTCGGACCCTCCCGGTAATGCTCACCAGTCTTCTTGTTCATGCACTTGATGTTCAGAAGGGTCACCTCTGCAGCTTTGTTCAGCCCCTCC…	gz_contig_5423	100	2204	gi|242073518|ref|XP_002446695.1|
aj_contig_398	CGCCTTCGCGGGGGAGGAGGATTCAGGGGTGACGAAGGACAAGGGCAACAGCAATGCCGAGATACGCCCTGAGGAGGCTCAGGAGGCCTGGACGGTCATGCTGGAGCAGTTCAAGGCTGAGGCCCTGCGGATGCAGGCCCTGTCGATTCAGGCATACGAAGTCTACTCCAAGAGGACGAGGGAGGTGCTGTTGGAAGCCTCCCGGAAGCTGAAGATCCAGGCCGAAAAAGCGCAGAAGGATCTTAGTGTGATTGCTGCCGAGGTTGGTGAGGAGGGGCAGGAATATCTGAGGATGGCAGCTCAGAAGTCCCCGGACTCGGTCAAGGATATCACGGACACATTCAGGGATCTTCGCAGATTGAGTTTTCCATCGGAGTATAAGGATTATCACGTGGGCAT…	gz_contig_2897	100	713	gi|226494829|ref|NP_001149750.1|
aj_contig_400	ATGGAAAACTTGAGGTTTCCATATGAAAGATCAGTATCTAAAATTACTCTGAGTTCCGCCTCACATTCTGATACAACACTTAGTCCTTGTACTATAAATACCACAAAAAAAAGACAGCTTATTGCGGACATATTTACACAAGAGATGACCTGCAGTTTGATACACAGTAGTAAAACTTCATAGGTGCTAAATCGCACTAAGCTTTCACAAAAGGCGAACGTGTGAAGATCCTGGACAGCCCATCGCTGCCTGTCACCTCATTCCTGTGACGACCTCAGGGTGGTAGTGTAGCATCTCCTGCCACATCATTTCTCTGATCATATCGACACCAAGATTTTCATCTATATCGAGGTCGATGGGCACTTGAGCAGGAGGGTTTGCACTTGGATCGTACAGCGG…	gz_contig_5016	98.45	1352	gi|115469744|ref|NP_001058471.1|
aj_contig_401	TGGCCAGCCAAGGTCAGCAGGCCCGAGGACTGGAAACTAACGGCTGTGCCGCGCAAGTTCTTTGTCTACTTCTATGGCACCAAAGAGATTGCTTTTGTAACTCTGGCAGATCTTCAGGAATTCACTGAAAGGGCAAAGAATGAGCTTTTAGATCGAGCTTCGAGCATTAAATTACCCAAAAAGTATGCCCCATCATTCAATGAGGCAGTGGAGGAGATCTGCAAGGCTTATGATGAGCTGCCAAAATCATCTGAAACTGTAACCGATGCTTTGCCTGATCAGAGTGGAAAGCCATCAGAACACATTGTGAAGTCGCCTGATGACAGCGAGACTCCAGGACTGGGACAAATGGAAGTTGCTAGCCCTGTTGACAACTCAGATACTTTAGAGCAAGGATCA…	gz_contig_8553	100	3092	gi|242077819|ref|XP_002443678.1|
aj_contig_402	GCCTCACCTGGAACACTAAAGTTCCCCCCATGGAAGCTACTGTACCAATGTAGTATTATGGCGAACGTGAAGTAGCTTGTCAGCATTTCAATTCCACATTTATTCTTTTTACAAAGACTCAACATATTAGGACGACTCAAGAATTCCCATTTCAATGGCCCCTGGGGTACGTGTATCTAAGACGAGCAGCACCGCGATGTGAAACTGCTGGAATTTGTGGCCGACACTTGAATGGATTCTCCCTCTCTGATGCTAACAGACCCTCCCGATCCAGGTTCTGATGACATGGGCTTCTTGCTGATGATTCGGTATATCTCGGCAAGAACGGTCTGAAAAGCCTTCTCCACATTTGTCGCATCAAGCGCAGAGGTTTCAATAAAGAACAACCCTTCACTCTCT…	gz_contig_14585	100	686	gi|242048154|ref|XP_002461823.1|
aj_contig_403	TCTTTTTATTGATAATTACACACCACTCAATTATACAGCATACAAAGCAACAAACCAAACCGTAAAATGAATCAAAATTCTGGAAAAATGACATTTGACAAAAATAATGGCAATGGAAGAAACAGCAGTTACTTTCCTGTCTATTCCGGAAAATCATATCACTCCAGAAGCAGGTTATTCCTTTGTGTTTTCCTTTTTCTCGAACAAGTAGGAGATTCCTTTGTGTTTTCTCAAACACTTAGGAGATTCCTTTGTGTTTTCTTACTATCCAATACAGCAACTTGGGACCCTGGAGGCAATGTACATCACAGGTGGGGACACTTCGATCACAATGCGAGGCCTTCTTTCCGAAATGAGATTTTGGTAGACCTGTGCACCGGGATGCTCTTTACAGATGTG…	gz_contig_1711	99.75	1220	gi|195629246|gb|ACG36264.1|
aj_contig_404	TAATAGTGTCTCATTAACATGGGCAGACAAGCAAACAACAACGCGGCCAATCAGTGGGACCTGTTTGGTCTAAATTGAAATCCAGGAGAAACAAGCAGGGCCACGCATTGCAGATCGTGATCCCTAACAACAGGACACGTGACCTTGGAATGCCTGTCACTGCAAGTACCAGGAGGAACCGATTGATGAGGGAGGAGTTCGGCCAGTCAACGTCACTGTCTATCGTACCTTACATGTTTCATACATCCGATAGGTAGTCCTCAAGGAGGAGATGATCGAGGATCAATCAACCACCGCGTGCCTCCCTCCTGGTGGCGTCGTGGAGGATGTCAATGTCCACACCGTCCTGCGGAAGCAGGACATACCGCACCACAGAGCCTCTGATGAAGCAGTTCCGCA…	gz_contig_19818	99.33	446	gi|218200492|gb|EEC82919.1|
aj_contig_405	ACGGCGGTGGGCTGCGGAGGCGAGAGCTCTACCTGAATGCTCGTGCGTCGGAGGGATCCAGAAAGACTGAGGGTAGCCATGATGCGCGTGTGTCGGTCGATGACAAACCGAAGAAGTTGAAGGTCAAGATCCGCAGTAATTTGTTATCGAAACCGAACCCTGATACGCAGGATTCCAGGTCTTTGCCAGCGAAGCCGCCACGGCCAGGAGATTCACGGCACCATCAAAAGCATGGTAATCTGACTGAAGGCACAAAAGTTTCAGATAGGTCAACCTCTTCGCGAGACAAGAAAACCAAAAAGGTGAGGTCGATTGAAGAAGCATTGGCTCAGGAACAACCAGCCAAAGCTCAGAGAGATCCACCTTCAGAACCTCTCCGGAAGAGTAGGAGGCTTGCTA…	gz_contig_1183	100	923	gi|242085868|ref|XP_002443359.1|
aj_contig_407	TCGTACATCTCCTCATTCATGGCAATAACTAGCAGCCTTATTAATATTAACTAGCGAGTTCGTTTAATCCTTGACGCATATAATTAAGCATAGTTTCACAGAAGCTAGCCGGTCGTAGAGATCATCTGGGTATATTATGCCACGGCGACGCTGAGCGACTCGTCGTGGTTGGGCATGTGGTATCTGTTGGTGAACCACATGGTGTCTGCGGCGATCTTGTTGCCCTCCTGGTTGCGGTACCATGCGTAGTACGCGTGGGTCCTGTTCTTGATGTCCAGCACGGCGTGGCCGAAGCTGTACTCCCTGAACGCCGAGTAGGCCGGCTGCGGCCAGGTGAGCTCGTCCGCGAGCCCCTCGATGTTCCCGCCGTCGCCGATGGNNNNNNNNNNNNNNNNNNNN…	gz_contig_1155	100	479	gi|326494546|dbj|BAJ94392.1|
aj_contig_408	CCGCCGGCGAACAAGCTGGACTGGATGCTGTTCTGAGGACGAGAGGACACCGACCGCCGATCACCACCAGCGCAAAAGGCAAAAGCAGAGAGGCGAATGCAATGCTCGTGTGCCCAGAATTGCACGGGCCCGTTCCCGGCAAAAATCTGATAGGATGTGCGATGAGATCATGATTGGGCTGGCTAAGCTAAGCAGCTTAGGCGCTTTGCTTTGCCTGTCTGCTTGCCTGGTCACAACACATTGCATTGGCGGCTGGTACCACTTCTAGTTCATCCTTGCGTCATGTGAGAGTATTTTTCTTTTTTTCTGTTCTTCTTCTTTTTCTTCTTCATCACCAATGTTTGCTACAGTATTCTTTTGTGTGCATATTAAGGAG	gz_contig_15773	98.39	371	gi|392399693|ref|YP_006436293.1|
aj_contig_409	GAAGGCGACTGGGTTTGCCCTGATGCGAGCTGTGGCAATGTGAACTTTGCAAGAAGGACTGAATGCAACAAGTGTGGCACACCGTGCCCAAGTGGAGGTGGAGGTGGTAGCAGCGGGGGGTATAATAGGTCTGGTGGAGGTGTAGGCTACAACCGTGGCGGTGGAGATTATGGTTCTGGAGGAAGAGGTGGCTTTAATAGAGATGGGGCGGATTACAATTCTGGTGGCAGAGGAGGATACAATCAAAGTGCTGGTAGTGATCGTGGTTTTGATGACCACCGCGGTGGCAAAGGTGGATATGGTGGGCGAGACCATGAAAGCAACCAAAGGGGTGGAGAAGGTGGTTACAATGCTACTGGTTATGGACAAGCTCCTCCACAAGGGCCTCCATCCTATGGC…	gz_contig_2691	99.44	536	gi|413947450|gb|AFW80099.1|
aj_contig_410	CTTCCATGGCTGCCTCCCGGTAGACGAGGACACCGCCGCGACTCCTCGTTACACCCTTACCTCAAGAGAGCACTACACCATCAGAGCGCGAACCGGGCGCCGGCCGGCGGGAGAAGTTCGAGACGATGGTGACGATGCGCGCGGCGGCCGNNNNNNNNNNNNNNNNNNNNNNNNNNNNNNNNNNNNNNNNNNNNNNNNNNNNNNNNNNNNNNNNNNNNNNNNNNNNNNNNNNNNNNNNNNNNNNNNNNNNNNNNNNNNNNNNNNNNNNNNNNCCGCCGGCGTCCTGCTGGTTCTGTCGGCGCTGGCGGTGGCGCGGGCCGAGGACCCCTACCTGTTCTTCGAGTGGAAGGTGACGTACGGTACCAAGTCCCTCCTGGGCGTGCCCCAGAAGGTCATCCT…	gz_contig_30687	75.23	1295	gi|46575968|gb|AAT01329.1|
aj_contig_411	GACGAGAGCTACACCATCTTCGTGGCGGCGGCCGGAGGCGCCAACTCCATCGTGGGGGGAGCAACTATTGAGGCCAACACAATATATGGAGCTATTCGTGGACTGGAAACATTCAGTCAACTTTGCATTTTCAACTATGATACAAAAAATGTTGAAGTCCGCCATGCCCCATGGCACATTCAAGATGAGCCACGTTTTTCATTTCGTGGGCTACTCCTAGACACCTCCCGGCATTACCTTCCTGTTGATGTTATTAAGCAAGTGATTGACTCTATGTCTTTTGCTAAGCTGAACGTTCTTCATTGGCATATCATCGATGAACAATCCTTTCCGTTGGAGGTACCATCATATCCAAATCTGTGGAAAGGTTCATACTCGAAATGGGAGCGCTATACCGTG…	gz_contig_6987	100	1436	gi|226504710|ref|NP_001147583.1|
aj_contig_412	CAGGACCACTCCCCTCCGGCCAGCAGCCACCGACCCCCGATTCCGCCGCCCCCACCACCGATCTCCTCCTCTCGTCGACAATCAAAATGAGCCGCGGTGGTAGTGCCGGTGGAGGTCAAAGTTCTCTGGGTTACCTCTTTGGAAGTGGTGAGGCTCCATCCCCAAAGCCAGCAGCTGCACCAGCTGCAACTGCTCCTCCAGCTGAGAAACCAGCGGCTGTAAAGGCTGATGTGGCCAAGCAGATTCCTGCTGGGGTTGCCAGCCAAACCAACAACTACCACCGGGCTGATGGGCAGAACACTGGGAACTTCCTGACGGACCGCCCTTCGACCAAGGTCCATGCAGCACCCGGTGGCGGTTCTTCCTTGGACTATCTGTTTGGTGGCAAGTGATGCTGTG…	gz_contig_10570	100	359	gi|414867258|tpg|DAA45815.1|
aj_contig_414	ATCACTTTTATCAATCCCTAAACATAGATGAACTGCAAAAAGAATTTCCAGAGTTCAGTACACCAAGCTCCAATACAAGACTATGATTGATGTCCCCCTCTTTCAGCTCCTGACTGACTGACTGATAGCCACTATCTGGCCTGATCGAATCTTCTTCTTCTAATTAGAAAACCAACAAACTCCACTCTTCCTCTCTTAAGACGCTAATTGACTGACTAGCTGCAAAGTTTTCCTGGCTAAATCTGTCTCCCTCTGCTGCTTGTTTAGCTCTCCTTCTCACCTACCTAACTTGCGCAACCACTCTGATTCATCTATTTCTCCTGCCCTCTCACCCTCCTCTATACAAACGAAAAAAAAATATTCTGGGGGAACCAATTAACCAATAGACAAAAAGAAAAA…	gz_contig_9871	96.55	347	#N/A
aj_contig_415	CGGGTACAGTGATCGGGCTGATGGTCCCGGACCAGAAGCACAACCACCACCAGCAGCAGGCGTCGTCGTCCAAGCCCAAGCTGGAGGTGCCGCGGATCTACACCACGCTGTCGCGCAAGGAGAAGGAAGAGGACTTCCTCGCCATGAAGGGCACCAAGCTGCCGGTGCGACCAAAGAAGCGGCCCAAGACCATCGAGAAGGCAGTCAGTTTTATCTGCCCAGGGGTGTGGCTGACGGATGTGACGAGGAACAGGTACGAAGTGCGCGAGAAGAAGTGCCCCAAGAAGCAGAAAAACCGGGGTCTGAAAGGGATGGAGAGCATGGACAGCGACTCGGAATGACCACGAGCGCCTGCAGTCGGACGCCGAAGTGCAGTGGAAGCAGCAGCCGCGGCGGAAG…	gz_contig_13141	100	671	gi|413948407|gb|AFW81056.1|
aj_contig_416	AATAGCAGAAAACATCGAGAAAAACCATAACTGCGTCATCTTTGATAGTATTAACATGCCAAAAAAACTAAAAAGAGCATTCCTAGTTGTACATGTAATGTCCTCCGCATACATGAAGCTGTCGGTCAGCTCTTGGGATCATAGAATTCCATCGTAGTACTCGTCTAGTGGGCATGGGCATCAAAATCATATACACCCCCGGTGCAGGGAAAAATCAAGTTGGCTGAGACAGCGGGTTGGTCTTCAGCCACAAGGACCGTCCTAGCATGGCTCTCCCATGAACAGCCATGTACGAAGCATTCAGCTTGTCAACATCAGGTATGTTCATCGGATTATAGACCTCCTTTTGTTCCATGCCTGGATGACCACCAGTAACAGATGCCACGTCTCCTGTTCCCT…	gz_contig_2556	99.78	1334	gi|242042043|ref|XP_002468416.1|
aj_contig_417	GTGAGGGAAGACATGCATCCAGGCATTTCAATCCGCATAAAAGTATCATAAATTTTACAGGGTACTTCAACATTCATCATGAAAAGAGGAAAAAAAGGCATTCCCTGATAAGGATAGGGAAACAAGAACATTTTATTCCAGCGGAGCAATAGTGAATTGCTTCAGATTGAGATCTTAGCGTCAGCTCATGATAAACTCTCTAGCTAGCGGGAAAAAGGCACCGATGAGTTCACAGAATCATAGAAAGTACCGATACGTTCATAGAATCATGGAACTCCCCAGTGAAAAGCAGAGGGGGTAAATGTCGACATCTGTAGGAGCTAAAATGGTGATTGTGGAACACTTAAACCACTGGAAGCTCCCCACATTCACTGATAATAACTTTCTTCTTCGGACGGT…	gz_contig_2441	100	920	gi|413942444|gb|AFW75093.1|
aj_contig_418	GGCGGTGTTCTGGTACTTCGCGGCCAAGTTCTTCGGGCCCAAGCGGCCGCCCGCGGAGCCCGGGATGCTCATGTCCAACCTCTTCCAGAAAGGCGAGCCAATGGATATGTGGATATATTTCTCTGAAAATGAGAAGTTCAATGACTTTGCTAATGAGGATGCACTTATCTGGCATGAGACCAACATACCATATGCAGTTTGGGGACCTACCAGTACCAGAACACGATCATTAACGTACTATCCTTCAGAGGCCCTCAAGCACAATGGCTCTTTGTATGCTCATGTTTACTTTGCCCGCTTGGGTTACCCTGTGGACCCTACAGATCCTGAATATGAGCATACATCTGCATTTGGGAGAACACATTCTGTTGTGGCATTTTTGCCGAAATCAAAGGCTGG…	gz_contig_3356	100	1619	gi|242075912|ref|XP_002447892.1|
aj_contig_419	GCGCAGTGCTGAGGAGCTGTTCGACGGTAGCAGATCTGAGCTAGATGCAGTCTCTGCTATTTTAAAGAAAGTTCAAATGTCACACTTTGGTTATGATGAACCCTTTTCTGGTATGACACCTCGTTTGTGTGACTTTGGGGCAGAAGATGAATGGGATCTGCATGATTTTGCACATCCAAGTGATTCAATGGTACAGATGGCTGTCTCAAAGATGAAGGATCAAATTGCTATGGAGATCAGCAAGATAGATGCTAGGATTTTGCGAAATGTTGCTGTGATTAAGCAACTGGAGCACAAGATTGGACCTGCTTCTGCCCTTGATTATCGGATGATTTTGCTTCCCCTCATGAAATCTTTCTTGCAAAGCCATTTGGAAATGCTGGTAGACAAGGATGCCAG…	gz_contig_3159	100	1355	gi|242036821|ref|XP_002465805.1|
aj_contig_421	CAGGGATAGTGAGGGGGAAACGAAAGGGGAGAGAAAGGAGGAAGAAGAGGCGCAAAACCCAAACCCTAACCATCATTCCAGCCCCCGCGCCGCGCCCACGGAACATTCCAGAACCTTCGGGCACCCCGGCGGAACTTCCCACAGGAGCAGCGCTGAGCGCGGGCGTTTGGATCGGAGGACGCAACGCTGGCGGCGNNNNNNNNNNNNNNNNNNNNNNNNNNNNNNNNNNNNNNNNNNNNNNNNNNNNNNNNNNNNNNNNNNNNNNNNNNNNNNNNNNNNNNNNNNNNNNNNNNNNNNNNNNNNNNNNNNNNNNNNNNNNNNNNNNNNNNNNNNNNNNNNNNNNNNNNNNNNNNNNNNNNNNNNNNNNNNNGGCGGCGCGCGGCGGCGGCAGGTGATGGC…	gz_contig_2100	100	1631	gi|226509154|ref|NP_001146094.1|
aj_contig_422	GCACAGGTCGCCGGAGATCTCACACTCGCACAGCCCCGCCCCCTCACCTCTTCGCCCGCGGCCATGGCCTCCGGGCAGGACTCATCTGGCACGACGCTGATGGATCTCATCACCTCGGATCCGTCGGCCGCCCCGGCCNNNNNNNNNNNNNNNNNNNNNNNNNNNNNNNNNNNNNNNNNNNNNNNNNNNNNNNNNNNNNNNNNNNNNNNNNNNNNNNNNNNNNNNNNNNNNNNNNNNNNNNNNNNNNNNNNNNNNNNNNNNNNNNNNNNNNNNNNNNNNNNNNNNNNNNNNNNNNNNNNNNNNNNNNNNNNNNNNNNNNNNNNCCGCGGCGCCGGCGGATCGCAAGTCGAAGAAGGGGACGCTGATGCAGATCCAGAACGAGACCATCTCCGCCGCCAA…	gz_contig_2401	100	3311	gi|414865988|tpg|DAA44545.1|
aj_contig_423	GGGCAATTCTATTTAGACCTTCAGAATGAGCTTTACAGATCTCCTTTTGCCATTTATCATCGAAGATACAGTACAAATACAAATCCTAGATGGCCTCTTGCTCAACCTATGAGGTTGCTTGGACACAATGGAGAAATTAACACAATACAGGGGAACTTGAACTGGATGCGATCAAGGGAAACCACACTACAGTCTCCTGTATGGCGTGCTCGTGAGCATGAGATACGCCCATTTGGTGACCCTAAAGCATCTGATTCAGCAAATCTTGACAGTACCGCTGAGTTACTGATAAGAAGTGGTAGAAGTCCCGCTGAAGCTCTTATGATTCTTGTACCTGAGGCATATAAGAACCATCCCACATTATCAATAAAATACCCAGAGGCAATTGACTTTTATGAG…	gz_contig_971	97.64	1649	gi|414887960|tpg|DAA63974.1|
aj_contig_424	CTCCCGCACCCGTCTGTTATACCCTGCTCAAGCTGCATTGGTAAATGGAGGTGCCAATCAAGTTCGTTCCTACGCCAAGGAAACAACTCCAGCTGACCGTCCTCCTGTCAACGGGGATGATCTTCTGAAGGGCATATTCTTTGAGGTAAAGAAGAAGTTTGAGACAGCTCTTGGAGTTCTTAAAAAGGAAAAGTTCACAATTGATCCAGATGACCCAGCAGCAGTTTCTCAATATGCTCAAGTTATGAAGACTGTAAGGGAAAAGGCAGATCTACTTTCTGATTCCCAAAGAATTAAATATACTATTGAGACCTTTACGAAGGGCATCCCTGATGCACGGACTTATCTGAATACTCTTCAGGAGATCAGAAAAAAGAGTGGCCTGATTGATCATCTTGG…	gz_contig_5053	100	923	gi|212722114|ref|NP_001132423.1|
aj_contig_425	ATCATGAAGAGATTCCATCAGTTGACCTGTGCAGCTCAGCATACAATCTGCTAAGAAAAATCATGATGTACCATGATTTGCTGTTGGCCAGGTGAACTGCAGGCACAAACACTAAATATTTTTGTTGAGATCACTGAATGATGTGCAGCATATATCTCTTGGTGAGTCAATCCATCAATAGCTTCAATACGGCAAGACACAATGGGCACGACCATCTTGCTTATGAGAATACCAGCACAATTCAATCTCCGGAAGCAGTATACGACACATTTGTCTGAGAAGAAACTATCCTAGATCACACTGCTATCATTTTAATGAACACAACCTGATCAGCAGCAAGGAACTAGAAGTCACTGCTAAGGCATATTCAACCAACTCCCAGCATCAGCATGGCCAGGT…	gz_contig_11833	98.18	824	gi|242078851|ref|XP_002444194.1|
aj_contig_427	ACCAAATAAAAAAACATAAATACCAAAAATTCCAGTGATGAACAGTCAGGACTACATTTTCTGATATATACTATGCAGATAAATAACAATGCATAGCTATTTTGTAATGACCATTATGTTACAGTACATTTGGAGTGTGAGAGAGGGAGCACAGAAAAAAAAGTTGCGGCATAACAGAGGATCACTGGAGAAAGCTCAGGGACAAGAGAGCAACGATTCCAACAGCCAAGAGGCTGCTGCCGGCGTTGGTGCTGGCCGCCGAGGTGGTGTTGTCAGCAGCCCCCGTCGGAGCCAGAGCTGCGGCGGTGCTCACGGCGAGAACAGGCGGTAACGGTGGGTCGAGAACGTCGGCAGGTTTGAGCATCGGAGCAGGCGCTCCCGCTGGAGGCAGCGCGCCTG…	gz_contig_29033	94.44	1241	gi|413926322|gb|AFW66254.1|
aj_contig_429	GCAGTTATGACACGCTAAAACTGCAATTGCGAAACCCCAAAAACACGCTGCACTTATGTCACAAAATAAAATAAAAAAAGAACAGTTATATTATTCCTTGTCAGATTACGCGCATTTGAAGCTAGATAATGATACTACATGGAATTTGCACTGGTATCTAGTCTATGTAACCAAACAAAGGATCTACGACCCCGAGTCGAGGNNNNNNNNNNNNNNNNNNNNNNNNNNNNNNNNNNNNNNNNNNNNNNNNNNNNNNNNNNNNNNNNNNNNNNNNNNNNNNNNNNNNNNNNNNNNNNNNNNNNNNNNNNNNNNNNNNNNNNNNNNNNNNNNNNNNNNNNNNNNNNNNNNNNNNNNNNNNNNNCCCCGAGTCGAGTGGGGAAATGGAACAGTTGGACTGTT…	gz_contig_19568	100	185	#N/A
aj_contig_430	AACCTTGTTGTTGACAACCCGCTCTCTCAGAACCCAGATAGCAGCTGGGGGCGTTTTTTCAGAGGGGCTGAGTTGGAGAAGACTGTTGATCAAGACTTATCTCGACTATATCCAGAAGATGGTAGTTACTTTCAAACGCCTAATTGTCAAGCCATGCTTAGGAGGATATTGTTAATGTGGTGCCTTCAGCACCCAGAGTATGGATATCGCCAAGGTATGCATGAGTTATTAGCTCCCTTAGTTTATGTTCTTCAAGTTGACGTCGATAAATTATCGGAAGTACGTAAACTCCATAAAGACTGCTTCAATGATGATTTTGATGGAGTGCCTTTCCCAGACACGGATATGGTTTTCAGTTATAAACCTAGAAAGGATTCAAAGTGGAGTGCAGGAGGTGAC…	gz_contig_5299	100	1325	gi|115477306|ref|NP_001062249.1|
aj_contig_431	CAAAGGAAATTTATCCAGATGTTCTTCCTAGCTCCCCAGGAGAAGGGTTACTTCGTCCTCAATGATTATTTTCACTTTGTTGACCAAGAACAGGTGCAGCCTGCACCTGTCATTGCTCAGGAAAATTTCGAGAGCAATTTGGCATCTAACACTGCTGTCGAAGCTGTTCCTGAACGCATTCATGAAGAAAGTCAAGCACCACAACCAATAGCATCTGAAGAAAATGAGGGTGTTGACAATTATAATTATTCGGAGCCATCACAGCAAGTAGTTTCTCAAACTGACAACTGGGGAGAGGAACCTCTTTATGAGGAGCCAGTTTCATCCTTCTCAAATGGCATGGCGATGACACCGGAGGAGCCAGTGCAACCTCCACCTGTGCTGCCACCTCGTGTGGAG…	gz_contig_4889	100	707	gi|222622111|gb|EEE56243.1|
aj_contig_432	TTTTATTATAAGCTTACCACCGAAGTTTGCAGTGATGATACAAGGTGTACAGAAAAGAAAACAAACTAGTAAATACTACATGAATACATGAACGATTGGAAATTGACTCGACATACAAAACGCTGTTACAAGTTTAACATGACTGCTGCTGTTGCTGCATGGGTTGCTCACCTTGCCAAGCCCACACTATGTCCTGAAGTGCTGGCCTCATCTCTTTGTTCAAAACCTTCTGGTACTCTAGCGTATCACCATTTGTCTTCTTCAACTCGACGAGATGGAAGTTTGGCGTAACTTCGAATATCTCAGCATCAATTCCCATCACACCTTTCCTTCCGAGCTTGGAGCCTTCCATCTTCAACAGGCCACCATCCTTCTTTGTGAGCTTCAATCGCAAGCTCT…	gz_contig_7407	99.02	1844	gi|229609757|gb|ACQ83494.1|
aj_contig_433	GCGGACAGCACGTTTCGCGAGGACGACGTCTCCAACTACTTCAGCATCTACGGCCCCGTCCACGACGTCCGCATCCCCTACCAGCAGAAGCGCATGTTCGGGTTCGTCACGTTCGTCTACCCGGAAACGGTGAAGCTGATCCTGGCCAAAGGCAACCCGCACTTCATCTGCGACGCGCGCGTTCTCGTCAAGCCCTACAAGGAGAAGGGCAAGGTCCCCGACAAGTACAGGAAGCAGCAGCTGCCTGGTGAGAGGATGGATTTCTCCACCAACGGGCTAGACAACAGAGACCCCTTCGATCTGCACCAGTTCGGCACGAGGATGCTGCAGCACTCAAACAGCGCGAACGAGATGCTGCTGAGGAGGAAGCTGGAGGAGCAGCAGCAGCAAGCAGCCGAG…	gz_contig_3222	99.73	1121	gi|242051314|ref|XP_002463401.1|
aj_contig_435	AGGAGGACCGGATCATCTGCTCCTTCTACAGCTCCATCGGCAGCAGGTGGTCCATCATCGCCTCCAAGCTGCCCGGCAGGACGGACAACGACGTCAAGAACTACTGGAACACCAAGCTCAAGAAGAAGGCGCTCTCCATCCAGCAGCAGCAGCAGCAGCAGCAGCATCATCAGGAGGCTGATGAGGAGATACTCGTGCCGCAGGAGGAACTGCCCAACCGCGCACAACCAATGGAAGCTGTGCCTGCTGAGCCAGTTGCTACAGTGGAAAACCAACCAGTTGAGGATCCACCGATCTCAAGATTTACATGGACCATTGAAAATCTGTCAAGAATCAACACAAAGAAATTATACTCCGAAGTTTTTGTTGTCGGGGGTTATAAGTGGCGAATTTTGATTT…	gz_contig_8954	100	1979	gi|357111520|ref|XP_003557560.1|
aj_contig_436	TGAAAAATGTAACGAACAAACGGATATGTACGAAAGAAAGAGATGACCATCACTTCGTCTAACATATCAAACTGGTACTATCACAATGTTAGCCAATGACAATGGAAGCAGTAATCTAGGTACAAGCAGGCGTTGCCAGTGGGACAGACACATTTCACACTGCACAAGCACCTACCGGTGGCGCCAACAAGGAGCGCTATCCGTTATGCAACAACAGAAGTAAAACATCATGATGTGAAGTAGATGGATTCTAGTAGATGGATAGGCTCCTTATAGTTTTCCGCCACAGGGCCTTGCCTTGTTTGACCGCTCCATTCTTCACTGGAGCATCTTGAGTGAGCTCACTCGTCATCGTCTTCCCCCTCTTCACTACCGTCGTCATCATCCTCGTCATTTACT…	gz_contig_6525	100	395	gi|115470082|ref|NP_001058640.1|
aj_contig_437	ATTAACAAGAGTATCGACCAGAATCACATAACACAGGGTAACTTCATGAGTCTATGATAGATAACACAGACCAACACATATCAGTTCCTTCCTAGGCATTTGCACAAACACAAGGCGGACACCACCAAGATGGATCAGTAAACTCCAACGAGCAGAGCAACTAATCAGCAGACCCTTTTGGAGATGAAAAGGGGCTCGTAGTACAGGGTTTTGAAACATTATAACCGCCCAGTGGCCGCCGCCCGCCGCCCNNNNNNNNNNNNNNNNNNNNNNNNNNNNNNNNNNNNNNNNNNNNNNNNNNNNNNNNNNNNNNNNNNNNNNNNNNNNNNNNNNNNNNNNNNNNNNNNNNNNNNNNNNNNNNNNNNNNNNNNNNNNNNNNNNNNNNNNNNNNNNNNNNNN…	gz_contig_14204	100	383	gi|117165994|dbj|BAF36296.1|
aj_contig_438	CTACAATTGAGTACAAGCAGGCTGCAAAATACAGAAAAGAATACTGCTGACACTTTGGATTGACCGAGCTAAATATTGAGCGTGTTAGTTGCTACAGCACTGCTACCGCGGGCAATAACAACAGATGTACTCAATAGCTACGTACATCATGACCTTTGAAGATCATTTATTATTGTTGTCCCAGGATATATATATTACATGAACAAAGGAACGAATGAGTTCGCCGCAAGCATGAGTAAGCAGACAATTCTTCTTACTCCATCCGTCACCAAAACCTGCCACTGATGCTAGACAGTAACCGAGGCTGCCTGAACTGAGTTGCCGGAAATTGAAAGTTTCGAACCAAGCAGTACTCACCTAGTCACCGTTTGTTTGCTGAATCTTTCTCACTGCTCAGAG…	gz_contig_9	100	461	gi|212720632|ref|NP_001132377.1|
aj_contig_439	AAGTTCACTAAATATTCAAATGCATATATGCTTGTGTACATTCGTGAAAGCGACAAGGACAAAATGGTTTGTAATGTGGATGAGAAAGACATAGCAGAGCATCTTCGAATTAGATTGAAAAAAGATCATGAAGAAAAGGAGCGCCGGAAAAAGGAGAAAGCTGAGGCACACCTGTATACAATTATTAAGGTTGCAAGGGATGATGACTTGACTGCTCAGATAGGGAAAGACATATATTTTGATCTTATTGATCATGAGAAAGTGCCAAGTTTCCGTATCCAAAAGCAGATGCCTTTTACTCAATTCAAGGAGGAGGTAGCAAAAGAATTTGGCATTCCTACACACTGTCAACGGTTCTGGCTTTGGGCCAAGCGGCCAAACCATACCTTCCGACCCAAT…	gz_contig_8974	99.42	2066	gi|218199136|gb|EEC81563.1|
aj_contig_440	GCAAGGTATCAATTGTTTCAGTGTCATTTTGTTCTAAAGTGTAGATACAAATGTTTGCTTCATTGCTAAAAACAACTGAAAGCTTTCACAGGGAGTCCACTTGTAGCATCAGTTATCTTTCACAGTATCTGTTCCTGACACTGCTATTTTGTGAATTCAAACTCTGGTTCACCTAAAGCGAGCATTGGTGCATCTTTTGCTGTCTTAATCAAAAAATATATTGTCACGTGGCAGTTGATTTGCTATCTATTACATTCTCATTTGCACCAATCAGCTCTGGTACTTTGTCAAGTAACCGGTTCATCTCTTCGGAAAATTCAAGCTTTGCTCTATTTGTCTTTCCTCCAACAACTACAGTACTTCCATCTTGTAATGCCCATATCTGAGAGTGCGAAAGAT…	gz_contig_7366	100	1019	gi|224031199|gb|ACN34675.1|
aj_contig_441	CCTCCGCCGCCCCAACCCCAACGGCATCGAGTTCGACAACCTCTACCTCGACATGAACGGCATCATCCACCCCTGCTTCCACCCCGAGGACAGGCCATCTCCCACGACGTTTGCAGAGGTTTTCCAGTGCATGTTTGATTACATTGATAGGCTCTTCATCATGGTTCGCCCTCGGAAGCTTTTGTACATGGCCATAGATGGTGTTGCTCCTCGAGCTAAGATGAACCAACAGCGTTCTAGGCGGTTCAGAGCTGCAAAAGACGCATCTGATGCGGCTGCACAGGAAGAGCGTCTGCGTGAAGAATTTGAGAGGGAAGGAAGGAAACTTCCTCCCAAACAGGAATCTCAAACTTGTGATTCTAATGTTATCACACCCGGGACAGAGTTTATGGCTGTTCT…	gz_contig_200	100	2045	gi|413921159|gb|AFW61091.1|
aj_contig_442	TCGCTCGCTCGATCATCATCTGTAGGACAGTAGGAGTACTAGTACCTAACAGCATCCCTGCTGCCCTGCTCATCAGCGACCCGCATTCGCCAGCCATGAGCAGCTACCTGTTCAAGAGGAGGAACGACGACAGTCAAGCGCCGCCGCCGGCGCAGAAACNNNNNNNNNNNNNNNNNNNNNNNNNNNNNNNNNNNNNNNNNNNNNNNNNNNNNNNNNNNNNNNNNNNNNNNNNNNNNNNNNNNNNNNNNNNNNNNNNNNNNNNNNNNNNNNNNNNNNNNNNNNNNNNNNNNNNNNNNNNNNNNNNNNNNNNNNNGGAGATGCCGAGCTTCCTGACGGACGGCACCATCCGCCGGTTCCTCCGAGCGAGGAGCTGGAGCTCGGAGCAGGCGACCAAGGCTC…	gz_contig_3197	100	1025	gi|115462895|ref|NP_001055047.1|
aj_contig_443	AAGCGGCAGCGCATAGCCGGGCCAGTTGCTCTGGTCGTCACCGTCACCGCGTTGGAGCTTGGACTCCTCCTCTGCCCCCCTGCTGCTCCCACCCTTCCGTCCTCGGCCCTCCCCTCGCCGGAGACTCCACCGCCTCAGCCGCCGNNNNNNNNNNNNNNNNNNNNNNNNNNNNNNNNNNNNNNNNNNNNNNNNNNNNNNNNNNNNNNNNNNNNNNNNNNNNNNNNNNNNNNNNNNNNNNNNNNNNNNNNNNNNNNNNNNNNNNNNNGGAGGTACGATCGCAACCCGTTCGACGAGGACGAGGTCAACCCGTTCGCGGGAGGAAGTGTGCCACCTGCGTCTAATTCCCGGATGCCACCTCTTCCCCATGAGCCAGCGGGCTTCTACAATGATCGTTCTGCG…	gz_contig_9867	100	797	gi|115440315|ref|NP_001044437.1|
aj_contig_444	TGAAGTTCCGGCTGTTCGACGGCTCTGACATCGGCCCCCTACGCTGCAACGCCGCGGCCACCACAATCGCCGCTCTCAAGGACCGCGTCGTCGCCGAATGGCCCAAAGATAAATCAATTATCCCAAAGACGGCTAGTGATGTGAAATTGATAAGCGGAGGGAAAATACTAGAAAACGACAAGAACGTTGCTCAGTGCAGAGCACCTTTTGGTGATCTTCCTAGTAATGCTATCACAATGCATGTTGTCGTTCAGCCATCATCAGCCAAATCAAAGCCAGATAAAAAGGCCAACAAGTTGCCCAAGACCACTCGCTGCTCTTGTAC	gz_contig_3275	100	323	gi|242075552|ref|XP_002447712.1|
aj_contig_445	TGGAGGGGGAGGAGAGGGAGCCGGAGCGGCAAGGAGTCTCGGAGGAGGTTGAGGTGAAGTTCCGGCTATTCGACGGCTCCGACATCGGCCCTGTCCGCTGCAACGCTGCGGCCACCACCGTCGCTGCCCTCAAGGATCGCGTCGTCGCCGAATGGCCCAAAGATAAATCAATTATCCCAAAGACGGCTAATGATGTGAAACTGATAAGTGGAGGGAAAATTCTAGAAAATGACAAGAACATTGCACAGTGCAGAACGCCTTTTGGTGATCTTCCTAGTAATGCTATCACAATGCATGTTGTCGTTCAACCATCATCAGCCAAATCAAAGCCAGATAAAAAGGCCAACAAGTTGCCCAAGACCACTCGCTGCTCTTGTACCATATTATGAACTACGATGC…	gz_contig_11573	100	560	gi|226506004|ref|NP_001150009.1|
aj_contig_446	CCCGCCTTCGGCCTTTGACTCTCAGCTTCCCCAAGCCCCTTGTTGATTTTGCAAACAAGCCCATGATTCTGCATCAGATCGAGGCTTTGAAAGAAGTTGGAGTGACAGAAGTTGTTTTAGCCATCAACTACCGCCCAGAGGTGATGATTAACTTCTTGAAGGACTTCGAGGATAAGCTTGGCATAACAATCACTTGCTCCCAAGAGACTGAGCCCTTAGGGACTGCTGGCCCTCTTGCTCTAGCGAGGGACAAACTTGCAGATGGATCTGGCGAGCCATTCTTTGTGCTCAACAGCGATGTCATAAGCGAATACCCATTTGCTGAGCTTATCGAATTCCACAAGGCCCATGGTGGTGAAGCAACAATTATGGTTACTAAGGTGGACGAGCCGTCAAAAT…	gz_contig_1952	100	1055	gi|226493137|ref|NP_001142302.1|
aj_contig_447	CCGGAAAGAATGGAAACCCCGATAGCTCACTCTCATACCTCTGAAGTCCAGAGCGACTAATCTCAGGAACAAGATGCGAAAGCTTTCTTGCTGCAAAAACCTAAGTCTATGGAGCGAGGACCAAAAGAGCTGCATCTTCTAATACCCNNNNNNNNNNNNNNNNNNNNNNNNNNNNNNNNNNNNNNNNNNNNNNNNNNNNNNNNNNNNNNNNNNNNNNNNNNNNNNNNNNNNNNNNNNNNNNNNNNNNNNNNNNNNNNNNNNNNNNNNNNNNNNNNNNNNNNNNNNNNNNNNNNNNNNNCCCTCGTCATAACAACTGTCATTCCAGCTACAAATCAGACATCGCCACAAAATCTAGGCCATCGGAACTCTGCAAATCTTCCTCAGATTGTCCATGTTCGA…	gz_contig_921	99.77	1277	gi|50253286|dbj|BAD29556.1|
aj_contig_448	AAAGCACCGAAATTTAGCCCAGTAAGGCTGGAATTATTCATGATCCATAGTCAAGGTGCACCTTTCAGTGTTTACAGGCGTCCAGCGCTGCTCATGTTAAGCATCTCACAGAGTTCTGAAGCGCTAGGCACAATGCAGAGTCACTAATTGCAAGGATTATCGATGCATTACAGAAGAAAAGCACTACCATGCAGTGTTTTGTGTAACAATCTCAAACGACCGCAGCAGCGCAATGTTTAGCAGCAGGTGTATCATTCCTGCATGTTTTTTCTACCTGAACCACCATCTTTGGATTGCAGATATGGGCGTCTGCAGGAATGGAGCATAGCGGTGGATGTATGGATTTACAATCCTGCCAATTTTTGCCCAGGCGCTCTGGTGATAGCTAGATGTCACAGG…	gz_contig_2998	100	827	gi|297605000|ref|NP_001056479.2|
aj_contig_449	CTTCACTTCTGTTAAACAAAATGTAAACACAGCACCTATACTTGCAAGTTTTTTGGGTTCAGAGAACTTATGACAACATCATTGTTCTATCTCGATAAACAGGCTCGCTTGAGGATGCAAACCTGCCTCCAACAGCGTCAGGGAGTGCTTCTCTGGACCATATGTGACCCGCGGGAAATTTGAAACTAAACTATACTTTTCTGCCTTCAAGCAATCCAAAGAATCCACGTAGTCATAGAGGGAAGTGATGGTCGACGAGCTGTGGAATCTCCGTTCCTTTCGCTCCCCACCTGGAAATCTTATGAGAACTTGAGTGACACCAGCTCCTTTCTCAGGTTCAGCTCCAAGGGCCATGGCCTTCTCTTGCCTCCTCCTTGCAAGAGCTGCCTCCTTTTCTGC…	gz_contig_7266	96.61	353	gi|242035317|ref|XP_002465053.1|
aj_contig_450	GCTCCGTGTCCTGACACCCCACCCCCCTTTCCCCTTCCTCTTCCCAGGCCAGGCATCTCCCCTCCTCTCTGCGCCTCGTTCAGGAATCCATCCACCATGAAGGGGGCCAAATCCAAGGGCGCCGCCAAGGCCGATGCCAAGTTGGCGGTGAAGAGCAAGGGCGCCGAGAAGCCCGCTGCGAGGGGCAGGAAAGGAAAGGCCGCCAAGGACCCAAACAAGCCCAAGAGGGCTCCCAGCGCCTTCTTCGTTTTCATGGAGGAATTCCGCAAGGAGTTCAAGGAGAAGAACCCCAAAAACAAGTCCGTTGCTGCTGTGGGTAAAGCAGCCGGTGACAGGTGGAAATCCCTCACCGATGCGGACAAGGCTCCCTATATGGCCAAGGCCAATAAGCTCAAGGCG…	gz_contig_5414	100	362	gi|115470082|ref|NP_001058640.1|
aj_contig_451	ATTCGCACAGTAAAACCAATAATACATTACAAGAGTGTTATGTTAATCCAACATCAAAGATGTACAGTTCTAACAAGGAGAGTTGTACACATCTGCCTAGCTGTTTCAGGCCCTGAGGTACCCGTGAAAATGCCAGTTAGTCGCAGCCGCTGAAGATATCTGCCCCAGTCGATCGCAACTTCCTCACCATCAGGAAATTGTCACCATCCTCTAAATGACTTGAAGCCAGATTTTGTATTAGTTCCACCAGCCAACATCTTCCTTGCAGGCTTCAGTATTTGGAAGGAGCACATCAAAGTGTCATCTACACTCATCATGGCACCAGCATTATCAAATTCTCCGCAGTAGTTAGGGGCCGAGAATATAGTTACAAGTTGGCGATTAGCAAAAAACTCATAC…	gz_contig_4656	100	1217	gi|115449733|ref|NP_001048539.1|
aj_contig_452	GCGTCATATTACAAAGTCCTCCCCTCTGTTAAACAAACTATCAAAAGGATTACCTATACTTGCGACTTTTTGACTTCACAACTTAGGACACCATCATTGCTCTATCTCGACAAACAGGCTCGCTTGAGGATGCAAACCTGCCTCCAACAGCGTCAGGGAGTGCTTCTCTGGACCATACGTGACCCGTGGGAAATTCGAAACTAAACTGTACTTTTCTGCCTTCAAGCAATCCAAAGAATCGACGTAATCATAGAGGGAAGTGATGGTGGAGGAACTGTGAAATCTCCGTTCCTTGCGCTCCCCCTCAGGAAATCTTATGAGAACTCGAGTGACATCTGGTCCTTTCTCAGGTTCAGCTCCAAGAGCCATGGCCTTCTCTTGCCTCCGCCTTGCAAGAGC…	gz_contig_7271	100	434	gi|242035317|ref|XP_002465053.1|
aj_contig_453	CCGCGCACCGGCTCCCCCTCCATGGAGGCATCCCTGAACCATCCACGGCGTAGTGGGGCCATGGTAAGCTCCGCTCTGAATGGCCTACGGGGAAGGCATTCTCTTTGTTCGGTGCAGTTCGTGGATGCCCTTAGGAGTAGTCTCCAAGTGGAGACAAACTACTCCCTTTCTGCAAAGTCATTGACAGCTACTGGGAGTGATGATTCATCTATAACCTGTAAAGGATTCTGTACAATATCGTGGAATCTAAAGGTAGATGTACAAGATGGTTACCTAATATTTGTGACAGGAGACCCTGTAACCCTGGGCTGTTGGGAATCTGACATGGCTGTTCAGTTGAACCCTATTGAAAGTAATAATGTATGGAAAGCTAAAATTAAGGTACCGTATGGGGTGCAT…	gz_contig_3376	100	2162	gi|115475892|ref|NP_001061542.1|
aj_contig_454	CCACGCGGCTCCGCCTAAGCCTCAGGGCGCCAAGTTCGAGCTGCACACGCTCCCCGTGGACGCCAAGTCGGTGGCCGACGGCGACACGATCAACGTGTATGTGGACGCGTCCGACCCCCACGTCCGCGGCAGCGTGCCCCGCGAGGTGCAGGAGGCGGCGGGGAGNNNNNNNNNNNNNNNNNNNNNNNNNNNNNNNNNNNNNNNNNNNNNNNNNNNNNNNNNNNNNNNNNNNNNNNNNNNNNNNNNNNNNNNNNNNNNNNNNNNNNNNNNNNNNNNNNNNNNNNNNNNNNNNNNNNNNNNNNGGGGGAGCGGGCCAGGGCGAGGGCCGCCAAGAACTACCAGAAGGCCGACGCGCTGCTCAAGACCATCGTGGACACGGGATACAGGCCGGTTCCGAAC…	gz_contig_16023	100	710	gi|242056275|ref|XP_002457283.1|
aj_contig_455	CGTTCGTTCGTCGGGTAATAACATTAGTAGGAGGAAATGTCAGGTGGCAGGCAATCATACTGGTGCTACCAGTGCAGACAGCGGGTGAGGCCTCGTGGCCGGGATATGGTGTGTCCTTACTGCGACTCTGGCTTTGTGGCTGAAATGGACGATGTAGATTCTCTTATGAGCCAGTTCATTGGGATGGACCCTGATTTTCATCGTGACCCAAGATTTGGGATCATGGAGGCCATCTCCGCCATGGTACGGCAAGGTATGGTGGGAATGAATAGGGATGTTGATGTCAGAGGAAGGCCCAACATATTTTCTGACCTGGAAATGGAGTTTGGCTCTGGACCATGGTTGCTCTTTCGTGGCCAGCTTCNNNNNNNNNNNNNNNNNNNNNNNNNNNNNNNNNNN…	gz_contig_17184	99.54	653	gi|242035753|ref|XP_002465271.1|
aj_contig_456	CACACCTACATATATGAACAACACGCCATGGCCGTAATCTCAATCGAGACCAAGGCTGGAACATTTTGTTTCCATTATCTAAAAAATGAACAACACGCCAAGACCTGTACACGGTATTTACAATATTTACATGCCATTGCTTGCAGCAGAGCTCACCAAAACGGGCACCACCCTACGTAATTTTGGCACAGGTTTTCATGTGAGGTCGCTTGGAGTATGAGCTTTTGAACCTGGACTTTGACGGATAAACCAGGTTCCACATCCCTGGCATCTCCTGATCCCAAGTGATCACTGCCATGTTGGGTCGAGCTGCCTATTCCTGACAATGCTGCTGACCCAGAAGAGAAGTCACGCCCTGTTAGCTTGTGACTCATCCGTGCCATTACAGCTACAGCACGC…	gz_contig_1726	100	3569	gi|242087615|ref|XP_002439640.1|
aj_contig_457	GACTGACTGACTGACTGATAGCTACTATCTGACCTGACAGAACCTTCTAATTAGCAAACCAACAAACTCCCCTTCCTCATCATCACTTTCTTAAGACAACCCTCCCTCTTCTAATTGACTGTCTAGCTGCCAAGTTTTCCTCGCTAACTTGCAAGTACAACCATTGATTCATCTATTTCTTCTGCCCTCTCTTCCTCACCCTCCTCTATTCTATACAAACAAAAAAAACATTCAGGGGAACCAATTAACCAATAGACAAAAAGAAAAAGGAGAAAAACCCTAATGAACTAACGCCAGGATG	gz_contig_17555	100	215	#N/A
aj_contig_459	TTTTCCCATAGGTCGTAGTGTGGGAAGGTGGGCTCAGGGAGACCAGTTCGTGTCTGATGAGTAATCATCACGTCCTCCACAAAAGTCGCCCATGGCATGTAGGGGTCGCCAAAGAACTTAGACATTAACCCTTTATCTGGCTTGATCGACTTGAGCCGGTGGCGGNNNNNNNNNNNNNNNNNNNNNNNNNNNNNNNNNNNNNNNNNNNNNNNNNNNNNNNNNNNNNNNNNNNNNNNNNNNNNNNNNNNNNNNNNNNNNNNNNNNNNNNNNNNNNNNNNNNNNNNNNNNNNNNNNNNNNNNNNNNNNNNNGGCCCATGTAGCGGCGGTAGCCAATGATCAGCTTGGCAAAATTGCCACCATGGGTCATGACAAAAACATCTGACTTCAGGCATACCAGGA…	gz_contig_16847	100	1118	gi|226504748|ref|NP_001152550.1|
aj_contig_460	AATAATAATAAGCCTTGTACATTGAGTTTACATTAAACCATCAGGAAATAAAGTACTTTAGGTTCTTTGCATGGAATATGGTAGTAGTAGGGAAAAAAAGCTAGTTTTTTCTTTGCATAAAATACGGCAGTAAGATACAGAAATACAAGCACGCAACCATTATAGTATCTATCAGTCAGAATCGGAATCATGTCTCCTCTTCTGCTTGTCTTTGCGGTGGCGCTTCGACCTATCCTCCGAGTCGTGCCTCCTATCGTGCTTCTCCCGCCTCCGCTCCTTTCCATCAGCATGCTTCTCCCGTTTCCGCTCTTTCTCCCCTCTCCTCTCCTCACGCGGCCTTTTCCCTTTCCTATCATCCTCTGAATCTTCCTGCTTGGCTGCTGGTGGCCGATCAGCTTG…	gz_contig_7723	100	542	gi|242079643|ref|XP_002444590.1|
aj_contig_461	CGGGATAACAGTCCGTTGCTGCCGATCGATCAGGAGTCACTTGAATAGTTTGCAAAATGGTGAAGATATGCTGCCTCGGTGCTGGATATGTTGGCGGCCCAACCATGGCTGTCATTGCGCTGAAATGCCCTGACATTGAAGTTTGCGTTGTCGATATTTCTGTAGCACGCATTACAGCGTGGAATAGTGATCAGCTTCCTATTTACGAACCAGGCCTTGATGATGTGGTTAAGCAATGTCGTGGCAGGAACCTTTTCTTCAGCAATGACATTGAGAAGCATGTTGCTGAGGCTGATATCATCTTTGTCTCTGTGAACACACCAACCAAGACCCGTGGTCTTGGAGCTGGCAAAGCTGCGGATCTAACCTACTGGGAGAGCGCAGCCCGCATGATTGCTG…	gz_contig_6904	98.55	1445	gi|242041801|ref|XP_002468295.1|
aj_contig_463	GTGATCTGGAAGGGCGACAAGCTGATCGACGGCGTGCCGGAGACGCTCGACTTGCTCCGAGCAAAGGGCAAGAGGCTGGTGTTCGTGACCAACAACTCGACCAAGTCGAGGAAGCAGTACGGCAAGAAGTTCGAGACATTGGGACTAACTGTCAATGAGGAAGAGATTTTCGCGTCATCCTTCGCCGCTGCCGCGTACCTGCAGTCCATCGATTTCCCCAAGGACAAGAAGGTTTATGTTATTGGAGAGGAAGGGATTCTGAAGGAGCTGGAGCTGGCTGGATTTCAGCACCTCGGTGGACCATCAGATGGAGACAAGAAGATCGAGCTGAAGCCCGGTTTCTACATGGAGCACGACAAAGACGTTGGAGCAGTTGTGGTCGGATTCGATCGCTATTTC…	gz_contig_14866	100	950	gi|115459134|ref|NP_001053167.1|
aj_contig_464	CCAGATATACTATATAGTAAGAAAACAAAGTAGTAGTATAATAAACCCGATGATATTTATTTATTACACCCAGACAGTGTATTTTGTATTAAGGAAACATATATATGAAGAGTCTGTCTGCCCTTCAAGTGTCGAAGATATAAAATGCGCATAAACATGTGGGAAGTAAACAGTCACGTTGTAAGTAAATAGCAAGCTGGTAAACCGCGTCGATCCACAAGCCTCGAGCACTCTGCTGCGGGAGAGAAGCATGCACTGTTGAAGCCTAGCCGGTGTTCTGCATGCCGGCGGCGATACCCTTCATGGTGATGATGAGCCTGTCCTCCAGTCCCGGCGCGTACTCGCTCGCCGGGTTCAGCTTGACCACGTCGGCGGGCTCCTCGTTCAGCGGCGGCTTCT…	gz_contig_1848	99.8	1490	gi|11991545|gb|AAG42288.1|
aj_contig_465	AAGTTCGCACCATTCAACCCTCATCAATGAAAATGAATACCACTGACAGAACATGCTCCTGAACAGCATTTGACCAAAACACAGCCAAAACCTAGTATGGTGCCCCCTACATATTACAGCCCCATCTCCACAGCTCCGTTCAAACAACCACTGGTAATGATCTTCAACATCTATCACTCATTCATAAAAAATGACAGATTCGTGTGTGATGGACCACCCAAAAAATATCTGGCATGTCCTTGCAGCTCTAGCTAGTTCAATTAAATCATCGTTTCTTCTGTTTGGTTGGCAGAGTCAGTCTGATTAGCGGCTTTTGATTCTTCCATATCATCCACACTCTGAAACTGACTTTCCAAAACATCGTTTATATTATCAGGTGGGCATCGGTCTGCTAAAGAC…	gz_contig_1266	98.76	1697	gi|108864387|gb|ABA93715.2|
aj_contig_466	CTCGCCATAGGTGTGGAAGGAGGGTTCTCTGATCAAGAACCTGAATATGATGAAACTTTTGAAATTGTGATCTTACCTGAATTTATTTCTTTTCCATTCCCGTCAGTTGACTTACCAGAGAAGGTTAGGCTTGCAGTTGATAAAATTTTACTTGCTGAAAGCGCTGATAGGAAACAACAACTGGCTGCTTGGGTTGCTGACAAGAAGAAAATTAGTGCATTTGCTATGGATTTGCAGCAGCTAGACAATGGTGTTGTTGTGCCTCCTACTGGATGGACGTGTACCAAATGTGATAAAACTGATAATCTCTGGTTAAATTTAACTGATGGTATGATCCTCTGTGGGAGAAAGCTTTGGGATGGAAGTGGTGGAAATAACCATGCCATTGAACACTACCAA…	gz_contig_3550	100	1706	gi|242056203|ref|XP_002457247.1|
aj_contig_467	GTTTCAACTCTACTACCCATCCAACCATGAATCATCGCCAGTCATGGGGTACAGCAACAAAAGAACAAATTAATATAATGGAGTAATCGATTAAGGGACGGAATGGATTCGTTGGTGCTGGACAGATCAGTCCAGGCGCATCATGTCCTTGTGGAAGTCGTCGACGGCGTCGGCGNNNNNNNNNNNNNNNNNNNNNNNNNNNNNNNNNNNNNNNNNNNNNNNNNNNNNNNNNNNNNNNNNNNNNNNNNNNNNNNNNNNNNNNNNNNNNNNNNNNNNNNNNNNNNNNNNNNNNNNNNNNNNNNNNNNNNNNNNNNNNNNNNNNNNNNNNNNNNNNNNNNNNNNNNNNNNNNNNNNNNNNNNNNNNNNNNNNNNNNNNNNNNCGGCGTCGGCGGCGACGCA…	gz_contig_14888	100	173	gi|242093470|ref|XP_002437225.1|
aj_contig_469	CTTTATTCATATGCGACTGAACAGGGAAATTTACAGAGGCTTGCACAAAAACTGCAGCTCTCCTTAGGCTAGCCACTAAGGGATTGTCTTATGATGCAAATAGTACTAGGAGGAGAAACAGTAAGAAAGGAGAAAAAATGGAAGAAAGAAAAAGAGAAACTATTAAAAAAAAACTAGGCTTCCATCAAGGTTGGCAAAGATCTATCCTAGTGTACATGCTTAACCAGAAGCCAAAGAAACTATTCAGAAGTAACAGTCGTCTGTTTATGCACTCCCCAAAGTTTTGACGAGGAAGCATATGCCTTATATCTAAGTACAGCCAAATCACATTGATCCAGAGACTTTACGATAAACTGCTCTCCTTAACTTCAATAGGTTTCACAGGAGTCGATGAATCAC…	gz_contig_9994	100	1268	gi|242079667|ref|XP_002444602.1|
aj_contig_470	CTTAGGAAGTATTGTTGCATCCCAGTATCGTGTAGGGCAACAACTTTCAATGATACATGACAAATTACCAGAACTGAAAATTACAAGCAGCCAAAACTGTTTGATGGAGTAAAGGATATACAAAGAGATGGTGTCAGCATTGTTCTTTCCACGAACTGAGTGATAGTTTTCCTCTAACATATGACACTTCATCAATTTTGATGAGGACGATCCAGCCCGCTCTTTGCTCTCTTCATCTTTGCTTTGAACCTCAATTTTAGTATCAGTGTCTCCACAGTGTTGACAAAGTTGCCCACTGCCATTACCACCAGCAAGATCCCGCAGACAACCACCTGCCAATCGGAAGCCAGCCCGTGCAAAGCTGTTTGAAGAAGCAATACTCCAACATACGCTTCAAAA…	gz_contig_4691	98.69	1148	gi|242060142|ref|XP_002451360.1|
aj_contig_472	CCCGTTCTCTGCGCCTGCTGAGAAGTTCGAGAATCGGCTCAAAAAGCCAACGACGTTCCTCTGCAAGCACAAGTTTAGGAATGAACTCCCAGACCCAAGTGCTCAGCTGAAATGGCTCCCACTTAATAAAGATAAGGACCGATATACCAACTACAGGATCACTTCACTTGAGAAAAATTACATGCCTAAAATGATTGTTCCTGAGGATCTGGGGATACCTCTCGACCTTCTTGATATGAGCATATACAACCCTCCTGCTTCTCAGCCGCCCATGGCTCCAGAAGATGAAGAGCTATTGCGTGATGATGAGGTCCTCACTCCTATTAAACCAGAAGGTATAAGAAAAAAGGAGAGGCCCACTGACAAAGGTGTTTCTTGGCTGGTCAAAACACAATACAT…	gz_contig_13593	100	554	gi|242080621|ref|XP_002445079.1|
aj_contig_474	GACTGACGTTGCCACACACCTCAATACTAATCAACAAATAATTAGTATCCATAACTTAAGATTATACGCTATCCCATAATTCTATCTAATAATATCCATAACTTAAGGTTATACGCTATCCCACAATTCTATCTACGCTAAAACTGCCTACTTCCAAATTACTAATTTTACACACCAAATGGTCACGAGAAAATTGTACACTCGACCTTAAATGTCGGCAAAGGTCACGGTTTCAGTATGCGGAGTCCGTCACTGCCCGTACAGACAAGCTGGCTGTTGTAACCCAAGCATGAGCTTTCGAAAGCCAGTCGTACCTCAAACTGATATTTACCGCTGTCAGAAGCTGGCTAGGCAGCCCCTGGTAGTGACGCCTCATTGAGGGGGTGCACCTCTGCTTTG…	gz_contig_1671	92.68	1187	gi|414867750|tpg|DAA46307.1|
aj_contig_475	CTGCTGCTGCTGCTGCTGCTGCCACTGTTTTCGCAAGGAGATCTTGAGCTAGCTTGTGCTTGTAGAAAGGAAGGAGAGAGGTTGAAGAAGATGTTGGAGAAGCTGTGGGACGACGTGGTCGCGGGGCCGCGCCCGGAGACCGGGCTCGAGAAGCTCCGCAAGGCCACCGCCTCCCGCCCGCTCGTCATCGAGAAAGATGCGGACGGCGGGGCAGCTGCCGGGAGCAGCTACAAGCGGGCGCAGTCGATGCCGACGACCCCGACGACGCCGGTGACGCCGCCGTCGACCACGCCGCGCGGCGGCAACAACAACGTGTGGCGCAGCGTGTTCAACCCCGGGAGCAACCTGGCGACCAAGGGACTGGGCGCCAGCATCTACGACAGCCCGCAGCAGCCCAAC…	gz_contig_2860	99.02	305	gi|226499388|ref|NP_001152232.1|
aj_contig_476	ATCCTGCAGTTCCTCGATGAGGAAAAGTTTAAAGAGACCGTTCACAAGCTCGAGCAGGAGTCCGGATTCTACTTCAACATGAAGTACTTTGAGGACGAAGTGATCAGTGGTAATTGGGATGAGGTGGAACGCTACCTTGGTGGCTTCACCAAGGTCGATGACAATCGTTATTCAATGAAGATATTCTTTGAGATCCGCAAGCAGAAGTATCTTGAGGCTCTTGATAAGCATGATCGATCGAAAGCTGTTGAAATCTTGGTCAAGGACTTGAAGGTCTTTGCATCCTTTAACGAGGAGCTGTTTAAGGAGATTACGCAGCTGCTGACCTTGGAGAACTTCAGGGAAAATGAGCAGCTATCCAAGTATGGTGATACAAAATCTGCAAGAGCAATTATGCTT…	gz_contig_4021	100	2030	gi|242036291|ref|XP_002465540.1|
aj_contig_477	CTCGTACGTGACAGCACAACAGGCAGAGCAAGCACCACACCACAGTACCCCACCCAGAAAGTTTGTAACAGGTCGATCTAGTAGCAATAGATGGCGTCGACGCTGGCCAACGTGAGCCTGACCACCACCCCGGCGACCTTCGACGTGCTCACAAGGCCGCAGCCGAAGGTCGCCAGCCGCGTTTGCTTCCTGGCCGCCCGCCGCCGCGGCGGGAGGCCACAACCGTGATCCCACAAGGCCACAACCGTGTGCATGTCTTCCGTCACATGAGCGAGGCTGCTAGCTGCAAATTTGTTATGCGTAGATTACACCGACCGATCCGGCCGGCGATGGTGCAAAATAATGGATGTTTAGAAAGGTGAAGTGATGGATTTGGAGAGCATCAAGGAGGCGGAGGAG…	gz_contig_10296	100	212	gi|115436144|ref|NP_001042830.1|
aj_contig_479	ATCCTCTTCTTCTGGGCCAAGTCCGCATCGCTGCTCAACAGGCCTCTTCCACCTCTTCCAAATCTAGAGGTTTCGGACGCGGCCGTCGAGAAAACTGCAGATCATGCTATTGTATGGATCAATAAGTTGTTGTCTGTTGGCCATGATATTGCCATCAAGAGGGACAGAAAAGTTTTTATACGGGTGATTCTGATTTTGTGGGTGGTTTCATATGTTGGAATGATCTTTAACTTCCTCACGCTCATCTACATCGGGGTAATGCTATCTCTGTTGGTTCCGCCATTGTATCAGAGGTACCAGGATCATATTGATGAAAAGCTTGGTCTAGCACACAGCGTCCTGTCAAGGCACTTAGATACCATCATTAGCAGGACTGGACAATCAACCAAGCAAAAGAAG…	gz_contig_10610	97.2	428	gi|359359164|gb|AEV41069.1|
aj_contig_480	ATCCTCTTCTTCTGGGCCAAGTCTGCGTCGCTGTTCAACAGGCCTCTTCCACCTCTTCCAAACCTAGAGGTTTCAGATTCAATTGTCGAGAAAGCTGCAGATAATGCTGCTTTATGGATCAATAGGGTGTTGGTTGTTGGCCATGATATTGCCATCAAGAGAGACAGAAAAGTTTTTATGCAGGTCGTACTGATTTTGTGGGTGGTTTCATATATTGGAATGATCTTTAACTTCCTCACGCTTATCTACATTGGGATAATGCTTTCTCTATTGGTTCCACCATCGTATGAGAGGTACCGGGATCATGTTGATGAAAAACTTGGTCTAGCACAAAGTATCCTGTCAAGGCACTTAGATACCGTCATTAGCAGGACCGGACAATCAACCAAGCAAAAGAAG…	gz_contig_14371	99.42	518	gi|359359164|gb|AEV41069.1|
aj_contig_484	TTGTACCAAAATGTTCCCCTTTCATTAGCATTGAGCCCCAGAATATTTTCTGAGGTGACCAAGTTCAAGCCCGACATAATACACGCGACTTCACCTGGCATCATGATTTTTGGTGCTCTTTTTATAGCAAAGATGATAACAGTTCCAATACTTATGTCTTATCACACACATCTTCCAGCATACATACCAAGATACAATCTAAACTGGTTACTTGAGCCTACATGGAGCCTTATAAGATGTCTCCACAGAGCTGCAGATCTTACGCTAGTTCCTTCAGTAGCTATAGCGGAAGACTTTGAAACTGCTAAAGTAGTATCAGCGAACAGAATACGGCTATGGAACAAGGGTGTTGACTCGGAAAGCTTCCATCCTAAATACCGGAGTCATGAAATGCGCATC…	gz_contig_15833	99.11	1013	gi|224030319|gb|ACN34235.1|
aj_contig_486	AGAGCAAAGCAGGGTACTCGGAGAGATAATGAGCAGCAACCTGGTGTCCACAGTTTCTTCGTCCCCCTCCGCCGCTCCTGCTTCGCATCGCCATGACGGAGTGAAGCGGTTGAGGTTAAAGCCGGTGCAGCCACAGCAGCAGCTGCACGGTGGCTGCCGGGGCGGCAGCAATGGCAGAGGCAGAGCTGTGGTGGCGAGGGCCGGGCCGGGGCCGCTGACGGAGATAGAGCCGGACCTGCATGAGGATCCCATCGACCGGTGGCGCACCAACGGCGTCAGCCCGGAGGACTTCGAGTATGGAATTTACGATGGCCACCACACCTACCATGAAGGCCATGACAAGAAGGGCTTCTGGGAGGATGTTTCAGAGTGGTACCAAGAAGCTGAGCCGCCTCAGGG…	gz_contig_5067	100	503	gi|222619809|gb|EEE55941.1|
aj_contig_487	ATCCTGCAGTTCCTCGATGAGGAGAAGTTTAAAGAGACTGTTCACAAGCTGGAGCAGGAGTCCGGGTTCTACTTCAACATGAAGTACTTTGAGGAGGAAGTGCTCAGTGGGAATTGGGATGAGGTAGAGCGGTACCTCGGTGGCTTTACCAAGGTCGATGACAACCGCTACTCGATGAAGATATTCTTTGAGATACGCAAGCAGAAGTATCTTGAGGCTCTTGATAAGCATGATCGATCGAAGGCTGTTGAAATCTTGGTCAAGGACTTGAAGGTCTTTGCATCCTTTAACGAGGAGCTGTTCAAGGAGATCACGCAGCTGTTGACCCTGGAGAACTTCAGGGAAAATGAGCAGCTCTCCAAATATGGTGATACAAAATCTGCAAGAGCAATTATGCTT…	gz_contig_11223	100	1448	gi|242036291|ref|XP_002465540.1|
aj_contig_488	AGACCAAAAAAATCATCTATGAACTCACACCACAAAGATTCGCTGGGCTATTCTAGACCCTTGGCCTTGGCAAAATATTGTATAATATTTTACAATCTTGTATCTGAAATCGGATGCTCAAAAAAGGCTAAAAATTTACGGCTCATTCTAAGAGAGCCACGACTCTGTTCAGGAGGTTCAATGCAAATACCGTATCTTCAGAATTCACCTTAGCAGTGAGATCCAGTGGTCCTGATATATGTCCTTCGGCAGCAATAGTAATTAGGCAAACATTTGAGGTGCTCAGGATTTCACTGCTAAATCTCCAGCATAAGCCCGAGGCGTCATCAATGCTGAAGGTTACTGGCATATCCATTGAAACGAGGTGAAAATTGGCGTTGCTCAGTATCTTTGATGCAA…	gz_contig_14748	100	1739	gi|242078007|ref|XP_002443772.1|
aj_contig_489	CGAACAGAATAAAACACATTATGTAACAATTTTAACTGCAAAGTCAGATACATGCATGACTTAGCCTGATTAGCTACGCATACTCTCCTAAGGCTTTGAGCATTCTAGTCATGTCCTCTGCACACAATCCAGTCTGGATGCCAAAATAGCATCTGCACATCATCCAAAGATTTGAGCCAACTTACATTCTTTTACAGAACAATTACACACTTTCAAGAGAACTGAACTACTGGACATCATACGCTACTGCGAGTTACAGGAACAGATACAGAGGTACAGATGGTTGTGCAGTCTTGAAATTATGAGGCGCCAGAAAAGGTACTTGGCAGCTGACATCTCATGCCTCTTCCACTTGCTCTTCCTCTTCCTGGAGGAGGTTCTCTCTGTTGTCGTGCGCCC…	gz_contig_1308	99.08	977	gi|357134649|ref|XP_003568929.1|
aj_contig_490	GAGAACGCGTTCCCTCAGTTCTCTGGCTTCGACGGTGCCAAGTCGCCGGCCTCGCGCATGCTGACCCACCAGAGATCGTTCGGGGCCGACAGCCATGGCAGTCCACAGTACCACGCCATGCACCGGGCGCAGCCGCCGCAGCATGCTTTGAATGGAGCTACTAGAGTGATCTCGGTCTCATCGCCCTTCAGTCCTCAGAACAATCCCATGTTCAGGGTCCAGAGCTCGCCTAACCTTCCGAATGGCGTGGTCGGTGGTGCTTCGTTCAAGCAGCCTCCTTTCGCCGTGAACAACACGGTGGCTAGTTCTACGGTCGGTGTGTATGGAACAAGGGATGCGCCCAAGCCGAAGACGGCACAATTAACTATCTTCTATGCTGGTTCTGTCAATGTTTTCGGT…	gz_contig_13190	100	776	gi|242049216|ref|XP_002462352.1|
aj_contig_491	AATCGCAGCACATGACTTTACATGTACCTATTTCTTTCCCTTTTAACAACTATCAAATTACACGCCATGACAGAGCCCAAACCCGGTACCAACATCTGTTACAACAAGCATTATTTCGGACATGAGATTGTACACAGGAATCACATCACCAGCGCCCGTTAGCATGACGACGCCACACGGAGACTCCGGTCACCCCACCACCCAAATGGGAGTAATCCCCCATCTGCTGGTGGAATCCATTTGTGTTGACTCCAACGCTCAATGGTGGAGTTGGGGAGCCATTCAGCCAAGGCTTTGACGTGCTCACGTCAGACACTCCATTGGAATAAGTACCCATTGAGGGAAATTGCCTTTCCCTCAAATCATTGAAATGGTTCATGTCATAGGCCCTCGAGAATC…	gz_contig_7674	99.69	2936	gi|413945965|gb|AFW78614.1|
aj_contig_492	TTTTTTTTTCATTTCAGCAGAGGGTAAATCCAAATTTACTGTACAAAGGCATTGACAAATTGGGATGCAGAGTATACTACAACAATCTTGACAAATCAGAATTATTTCCCATAAGTTTCATCACTCGATGCCCAGGAATGCCCTGCACTGTGACTCCCAATGCTCTTTAACCAGACGAATGCGTTCAACTCGCTCCAATTGCAGTCGCCTCTCCCAATATTCCGGACAGCTGTGGCTCAGCAGCATGCTCAGCTCATCAAGGTGCACAGCATTAGGAAAAACACCTTCCTGTCGGCATAAGGGACATTTTGCTTTGTGATCTGCAGATTTAAGCCCGTCAACAATTGTCACAGATGCTGCAGAACAGCAACACAAGTAGCAGAATATGTGACCACAGGA…	gz_contig_153	97.12	416	gi|242051258|ref|XP_002463373.1|
aj_contig_494	TAACAATTATTCCCCCCGCTCCTCAGCTAGTAGAAAAGGAACTAATAGTAGTAGTGCAGCTAGAAACAATTCGGCAATGTTATTATGCACCAATAACAATGACACCATCAAGGAGATAAAACTAATGAACAGACACCATTCGAATTGATGCCCCTCTACTGGCACGGTCATGGATGAAGGAAGAGAAAAATTGAACTCTGCTAGACTAGCAAGGGAGTGAAACAAAGAATGGCAATGATTTAACCTTACTCTTCTTCAGCTCATGGTGTTGCCATAGCCTGAGCCGCCCATCATGTTCTGGCCTCCGCCACCGCCGCCGTAGAGCTCCGTGGGCAGCATGGAGGAGCCACCTTCCCTCGCGTTGCTGCTGCCGGGACCGCCTCCTAGGTGGAGCTCGGA…	gz_contig_19196	100	167	gi|242059937|ref|XP_002459114.1|
aj_contig_495	CTCCTCGCTCTTCTCTGCACAGAGGGAGCTCCATGAGGAACTAGGCATCAAGCTCCCTGTTGATGCTTTTGAGATGATGCTTGTTTTTCTTCAAGAATGCGTTATCAACAATGGGACATACACGAACAATGAGTACAATGATGTTTATCTTGTGACTACTTTAAATCCAATTCCACTTGAGGCCTTCAGCCTACAGGAAAGCGAAGTATCCGCAGTTAAGTATATGCATTACAATGAGTATAAGAATTGCCTTGCAGAAGAAAATGGAGAATATGTGCCTTATGATGTGAATGGGCAGTATGGTCAGCTATTCGCTATTATTGAAGAAAGGTACAAAAGTGACATGGAGTCGCGCAGTTTAATGCTACAAAAACAAATTAGTCGTTATGCTCCTATCTA…	gz_contig_7260	100	1328	gi|218191732|gb|EEC74159.1|
aj_contig_496	CCCATCTATATTGTCTCAAGTGAACAAAGTAATATCTCAGCCGATGTCTCCAATGAACATGGTACTATGGTATAATGCAGTGAAACGGTCGACCTCGAATTAGAATGACAGCATTCTACAGCCCGCCACAATGTTTTCATGTTCTGTATGCAGATGTGTGGCTTCAGTCGAAGTATATTTTCCTCTGGTGTCAGCCGCTAATCCTCTGAAAGAAATAGAGGTAGCCCATATCCTTGGGCAGGTCAACAGATGCAGCAACCTTGCTATCGTTGAAAATTGCCCACCTCCCGTTCTTGAGGACATGGGCGACATAGTGCCCGCAGTGGGTAGAGGTGCCCATATGACTCACGAAAGCCATCAGCTTGTATCTGCCACTTCCGTCTGGTAAGTCCTCATCAT…	gz_contig_3549	98.7	1610	gi|242056203|ref|XP_002457247.1|
aj_contig_497	AATCCCCCAAGCGCAACAATATATAAAAAATATATAAAGAAACAGATAAGTTAAAACTGGAGTTTCACGAGATAAACCACAATTCAGTCTCAGGAAATCGATACCATGACAGTACTTTAAAGACGGATTCAAATAAGGTGCATCACAGCACACAATACAAAACTTAAACCAGAACTAAATCAGCTAGATAACGAGACATCCATCAAACTTCTCATTTCTTCTTCGCCGCAGCCTTGGTAACCTTGGCACCGGTGGGGTCCTTCTTCTCCACGCTCTTGATGACACCAACAGCAACGGTTTGCCTCATGTCACGGACAGCAAAACGACCAAGAGGAGGGTACTCAGAGAAGGTCTCCACAACCATGGGCTTGGTGGGAATCATCTTCACCATACCTGCAT…	gz_contig_497	100	1346	gi|2996096|gb|AAC15413.1|
aj_contig_498	TGGAGAAAAGAACAATTGTGCCAGAAGTTAAACCACGCAGGGTGATGATCTCACATGACCTATACATCCATCTGTTAAAACTAAGGATGAGATCACTCCCGCCAGAACGAATGCAAAGGGTGCTTCTGGCTTTATTCTGTCAAGGAACCTATGGTGAACGAAAATGACTGTACATTTGAATGTACAATGAACCATTAAGTGATAAAATGAGAGGTGAGCCTAAGAAAAGATCAGTAACTCTGCGCAGCCACACCCCGTTACTGGGCCTGTGGCTTGACGATCCTCACGCTGCTATAGAAGCGCTTGAAGTCCTTAATTGCCTGCTCCTCGATCTGTATGGAGCGGATGGATGATGGAGCATCAGCCTCTGGTTTGAACCAGCGGTTAGGAACATTGTCC…	gz_contig_1673	99.34	1817	gi|242047524|ref|XP_002461508.1|
aj_contig_499	CCTGCAACAGTTTTCAGTATCTCCGACTGCAGCGAAGGGCAGTTGTCCTTGAGGTAATCAAAACCCTCAGTTCGGATTACAGCTGAAAGATTTTCTGCAGCAAATTTTAGGCAAACAGCTTTAAGCTCCAAAGCATGGTGATGATCAGCCAATGCTAGTGTACTTGCAACTGAGGCAACGGTTATGCCCTTGCATAGGTAAGACTCACAAAGCAATCTTAGCCTTGCTAAGTCATATTTGTCTGCTGCAGCCAACAATTTTGCTGCTAGAGTATCAAAGACAGAACCGTCAGAGCTAGATGCACCCAGCTCGTTGTCATCAACAAGGGTATCTCTATAGATAAAATGAAGCATCGCCTTGAAAACTTTTGGCTCCATGTCATCAATATAAAACTCTTTC…	gz_contig_3608	100	446	gi|115470755|ref|NP_001058976.1|
aj_contig_500	TTCCACCCCACGGACGAGGAGCTCGTGCGCCACTACCTCAAGGGCAAGATCACGGGCCAGATCAACTCCGAGGTCGAGGTCATCCCCGAGATCGACGTCTGCAAGTGCGAGCCGTGGGATCTCCCAGATAAATCTCTGATCCGTTCCGAAGACCCAGAGTGGTTCTTCTTCGCGCCCAAGGACCGAAAATACCCCAACGGGAGCAGGTCCAACAGGGCGACGGAGGCGGGGTATTGGAAGGCCACTGGCAAGGACAGGGTGATCAGGTCTAAGGGTGATAAGCGGAAGCAGCATGTCATCGGCATGAAGAAGACCCTCGTTTTTCACAAGGGACGTGCCCCCAAGGGGGAGCGCACAGGGTGGATCATGCACGAGTATCGCACCACTGAACCAGAGTTT…	gz_contig_3712	100	1754	gi|242080633|ref|XP_002445085.1|
aj_contig_501	CCTGCAACAGTTTTCAGTATCTCTGACTGCAGAGAAGGGCAGTTGTCCTTGAGGTAATCAAAACCCTCAGTCCGGATTACAGCTGATAGATTTTCTGCAGCAAATTTCAGGCAAACAACTTTAAGCTCCACAGCACGGTGACGATCAGCCAATGCTAGGGTACTTGCAACCGAGGCAACGGTTATGCCCTTGCATAGGTAAGACTCACAAAGCAATCTTAGCCTTGCTAAGTCATATTTATCTGCTGCCGCCAACAACTTTGCTGCTAGAGTATTAAAGACGGAACCATCAGAGCTAGATGCATCCAGCTCATTGTCGTCAACAAGGGTATCTCTATAGATGAAATGGAGCATAGCCTTGAAAACTTTTGGCTCCATATCATCAATAGCAAACTCTTTC…	gz_contig_14666	99.49	587	gi|226528579|ref|NP_001150930.1|
aj_contig_502	GCTCCCCATCGTCTCCTCCTCCCACCCTCCCTATCATCACCGCAGCGCCTTCTCTCCACCGCTCGAAACATGGCATCCCACATTGTTGGATACCCTCGCATGGGCCCCAAGAGGGAGCTCAAGTTTGCCCTTGAGTCTTTCTGGGATGGGAAGAGCAGCGCCGAGGATTTGGAGAAGGTTGCTACCGACCTCAGGGCCAGCATCTGGAAGCAGATGGCTGATGCTGGGATCAAGTACATTCCCAGCAACACTTTCTCATACTACGACCAGGTCCTTGACACCACCGCCATGCTCGGTGCTGTCCCGGAACGCTACTCATGGACTGGAGGAGAGATCGGGTTCGACACCTACTTCTCAATGGCTAGGGGTAACGCCACTGTCCCTGCAATGGAGATGACC…	gz_contig_183	100	1256	gi|414869036|tpg|DAA47593.1|
aj_contig_503	CTTCCCCTTTTTCGCCGCGAATAGTTGCGAATAGGCTAGGGTTTAGCGCCCTCTCGACGCCGCCTCCCTCCGGCGATCCGACGTTCTCGACCCCCGGCTCTAGCGGAAGATGCTTCCCCTCTCGCTCCTCAAGACCGCCCAGGGGCATCCCATGCTCGTGGAGCTGAAGAATGGAGAAACGTACAACGGGCATCTGGTGAACTGCGATACGTGGATGAACATCCACCTTAGGGAGGTTATATGCACCTCGAAGGATGGTGACAGGTTTTGGAGGATGCCAGAGTGTTACATCCGGGGAAACACCATCAAGTATCTTCGAGTACCTGATGAGGTGATTGATAAGGTTCAGGAAGAAACTTCTAAGAGTCGATCAGATAGGAAGCCGCCAGGTGTTGGTCG…	gz_contig_8727	100	1502	gi|357129684|ref|XP_003566491.1|
aj_contig_504	CGCGGCCAGGACCTTCGTCGAGCACGGCATGGCTGACGGCCGGCTCTGCATCGTTTCCAAGGAGCCTGTTCCACCGTATGAGCGACCAGCCTTGACCAAAGGCTACCTGTTTCCTCCAGACAAGAAGCCAGCTCGTCTGCCTGGTTTCCACACCTGTGTTGGATCTGGTGGTCAAAGACAGACTGCTGAGTGGTACAAGGAGAATGGTATAGAGGTGTTGTATGAGGATCCAGTTGTGGCATTTGATGGCAAAACGCAGACCTTGAAAACCTCATCAGGGAAAATGCTGAAGTATGGATCACTTATTATTTCTACAGGCTGTGAAGCTTCAAGATTGCCTGCGAAAATAGGAGGAAACTTACCTGGAGTTCACTACATACGTAATGTTGCAGATGCTGA…	gz_contig_3261	99.58	1424	gi|226533530|ref|NP_001140697.1|
aj_contig_505	ATTCCTTTCTTTTCTTTTCTGTTTCTTTGTTTTGTTTCTGTTGTTGCCTTGCTTCTTCCTCGCTACACACTCTCTCTCGCCTATTGGAGAAGAGCCCTCTCTCTGTCTAGAAGCCTCGAGGCCTTTCTCTCGCGCCTTGCTCCTCGGCTCTGCCTGCAAGCGCTGCATTGCGGTTCGCGAGCCTTGACCTGCTAGCTCGTTCTTCACACCGCAGTCCGTCGACATGGAGTTCGAAGATCGCTGCCACAAGGTCCAGGAGCCCAAGTTCGACTGCCTGCTCTTCGACCTCGACGACACGCTGTACCCGATGAGCTCCGGGATCGCAGGCCATGTCAAGAAGAACATTGAAGATTACATGGTCGAGAAGCTGGGCATTGACGAGAGCAAGATTGAGGCCCT…	gz_contig_931	100	1130	gi|194707582|gb|ACF87875.1|
aj_contig_506	TATGGTTCTACTTCCTCTCAAACGATTTAATTGCAATTTTTCAAGAAATATCATGCAAATCATTAGGCAAAAAGGAGCTACATGCCCCATACACGCTGGCACAACCATGCAGTCCGGATGTCAAACTATGGGACAGTGTGAAAGTTCCTTTTATTCAAAACATAATAGCAATCGCTCTCTTGGAGTATGCTAGAGTTTACTCAAGGCAAGAGTAAGCAAGCGTCTTCTCCTCCGATAGCTCTTCGGCAGTAGCATCCATCTTCTTCCTCGAGAACTCATCGATCGGGAGGCCTTGAACTATTTTCCATTCACCACCACTGCATGTTACTGGGAAGGAATAAATCAGTCCAGCTGGCACACCATACGAACCATCAGAGTATACACCCATGGAAACATATG…	gz_contig_72	99.77	1286	gi|162464321|ref|NP_001105603.1|
aj_contig_507	CTCGCGCCGGTGCGAGGTTTGTAAGCATGCATTCTCCTTCTCTCCTGTGTATGCTGATAATGCTCCATCAAGACTTCCTTTTCAAGAACTCATTATTGGTGTTGGAATGAAAGCATGCCATGTTTTCCAATTCATTCTCCGTCTTGTATTTGTTCTCTCAGTTTGGCTCATGATTATCCCATTCATTACCTATTGGATATGGCGGTTAACATTTGTGAGAAGTTTTGGGGAAGCGCAGAGGCTATTCTTGAGTCACATCAGTGCTCAGTTGATTCTCAGTGATTGCCTACACGGGTTTCTTCTCTCAGCTATCATTGTCCTTATATTTCTTGGAGCCACCTCGTTAAGGGACTATATAAGGCACTTGCGGGAGCTTGGTGGACATGATGCTGAGAGGGA…	gz_contig_2106	99.8	3065	gi|413943585|gb|AFW76234.1|
aj_contig_508	TTCTTGAGGTCGAGGTTGATGATGATCATGCCAGGCCTGAAGTCAAAGTTCTCCTTCACAATGTTGAGGATCTCCTTGTCGGGGATCTTGCCGGTGCCGTAGGTGTCAACGAACACAGAGAGGGGCTCGGGCACACCAATGGCGTAGGAAACCTGGACAATTGCACGGCGAGCAAGGCCATTTGCAACAATGCTCTTGGCAGCCTGCCTTGCAATGTAGGCACCACTGCGGTCAACCTTGGTTGGGTCCTTTCCAGAGAAAGCACCACCACCGTGAGCTCCCCAACCGCCGTAAGTGTCAATGATAATCTTCCGGCCAGTGAGACCAGCATCACCATGAGGTCCACCAATGACAAAGCGACCAGATGGGTTCAGGTGGAAGATGGTCTTCTCATCAAGG…	gz_contig_1408	99.83	1796	gi|413950042|gb|AFW82691.1|
aj_contig_509	GGAAAATTGGGATATCACATAGAAGTATAATCCATTGATTAACATTGAGACAAACTGTATCACCAATGCCACGACAGGCACCTAAAGAATATTACCAGAACATGTAGCAGAGCAAACTGCAGATCTCGACTCATAAAAAAGAAAAAACACTGACACAATGACTCGACCAGTAAAGGTAACGATCAGCACATAACCCTGGTTGCTACACCAAAACACCAATCTCCTCTACGCTGGCTTCTCACGGCAGGCAATTACCGGAGCCTTCTTTTTCATCATCTTCTTCTATAACCGAGCAACCAGTCGCTGATCAGACACAAATCCAGGAGCCGGAGCTCCAAGCAGCAGCAATGCGCAACAGACAGACAGCGCGCGACTCCTCGTCATCATCCTTCCTTCTTA…	gz_contig_4580	94.57	275	gi|1709000|sp|P50299.1|METK1_HORVU
aj_contig_510	GCTTCCCTTCCGCCACCTCCAACGCCGAAGCTCCGGTGAGAACCCCGGGAAGTCCAATCAGGCACAACAGATACTGATTGCTGTACACTTTGTTGCACCTCCAGTGACACAAACTTGAGATCTTCAATGGCCCCTTTGCTTTATTCACAAATAAAGTCAAGCAAAGTAGTATTTGTTAGGAGGATTCATGAGAGTGGACGAACCAGGTTGCAAAGGCCTCTTCACTGGAACCCCTTGCGATCAAATAATTTTGAAAATCTTGTGTTGCGATGCACAAAGAATTTGTCTTGGGAGGCCTCTCTTCCCTACGCTTCTGTGGAGGATAATGCCAGCTTTATCACAGGATCAAATGCTGTGAAACCTATCGATTCAGAAGAAGCTCCAGAAATTCCAATCTTC…	gz_contig_13657	100	980	gi|357164966|ref|XP_003580225.1|
aj_contig_511	GCTGCTGGGGGTTCTGCTGGAGCTGCTGTTGCTGGGGGTTCTGTTGGAGCTGCTGCTGCTGCTGAGGGTTCTGTTGGAGCTGCTGCTGCTGGGGGTTCTGCTGGAGCTGCTGCTGCTGCTGCAACTGCTGCAGCTGCATTTGTTGTTGAGCGTTCAGCTGAAAGTTAACTCCTGGCATCTTTGGAGGGACCATAGAAGACATCATAATCCTCTGTAATGAGCTGAGATTGCTTCTATTAAGTGGATGACCCATCATGGACAAGCCACCAGAGTTAGGAAGGATTGGAGAACTGCTCCCAGGCATTCCAACAATTCCAGTCTGGGGATATATGCCTGCCCTTTGCTGTGCCATTCGCATCTTCAGGAGAGCAGGGTTCATACCTGGACGAAGTCCAGCTG…	gz_contig_5004	99.29	2549	gi|413925834|gb|AFW65766.1|
aj_contig_512	GGACCGGAGTGCCTGTTTCTTGCTGCTTTTCGGCCTCCCCCTGCTGCCATGTCGACCATGGATGAAGGCTACGGCCCGACCTGGGACAGCGACGACGAGTACGACAACTTCATACGCAAGATGAACCCGCCAAGGATCGTGGTCGACAATGATTCTTGCGCTGACGCGACAATCGTCAAGGTCGATAGTGCAAATGAGTATGGGATCCTACTAGAAGTGATCCAACTCCTGATTGATCTGAACCTTGTGATAGGTAAAGCGTATATAACCTCAGATGGTGAATGGATCATGGAAGTCTTCAATGTGACCGACAAGGAAGGGAAGAAACTCAAAGATAAGGCAACCATTGCACAAATGGAAGACTACGTTAGAAAGTCCTTAGGTGCCAATTCAAGATAC…	gz_contig_10417	99.68	941	gi|212274877|ref|NP_001130980.1|
aj_contig_514	AACACCAATGACTATCAGTCAGTCCATTGAGGAGCATCAGTTATAACGTTTCTTGTCCTCCTAATTAGTTGTTCTACTGTTGGGCAATAGACTGGTGATTGGCTCCCAAAAGCGATCCACCATCTCAGTGCTCTCCTCCACAGAAAACAAAAGGGCTACATTGACTTGATAACAAAAAGGAGAGGTTTACGCTATCACCGACGTCTCAATTCCGACTTTGCTAGTGTTCTTCACATCTTCGTCCTTCTGAGCTTCCTCCCACAGCTCAGGCAGGGCCTCCTTCATGTTGTGCAGGCTTTCCAAGGCATAATCAGCACCTCTTGTTCTTTCAGAAGTTCCAACCAGGACAGTCCGCATTCCAATTTCCTTTGCAGCTTGTATGTTCCTGAAGCTATCATC…	gz_contig_3385	100	1031	gi|242055761|ref|XP_002457026.1|
aj_contig_515	GACAGCAAAAGGTAATCGCCACTTAATTCAATTTCTCTCCGTCGTCAACTCGTCATCGCTGTTCGGTACCCGTACACATTACCATGGCAGTTCAAGGGAAATGTCGACAAAAGTTTACATGAGCACACGCAAACTAAATACACCAGCCTTCGTCCAGGCTAGAAGCAAGAGATTCCACCGATCCATGGCTATCTTTGCCAGATGCACCAACAGCACAACGGGACCCAGTTGCCGATGAGCCGGCGCCCTCAGACGAGCACCTGAGCGGCGGCCAACCTAGCGATCGGGACCCTGAAAGGTGAGCAGGAAACGTAGTTCAGCCCGGTTTTCGCGCAGAAAGCGACCGATGAAGGCTCCCCACCATGCTCACCACAAATGCCCACCTTCAGGTTAGGCTTA…	gz_contig_396	99.89	2852	gi|380691806|emb|CCA60997.1|
aj_contig_516	CCAGGACTGCCTCCTCCAGTGGCTCGACCACAGCAACTCGCGCCAGTGCGAGGTCTGTAAGCATGCGTTCTCCTTCTCACCCGTGTATGCTGATAATGCTCCGTCAAGACTTCCTTTCCAAGAACTCATTGTTGGTGTTGGAATGAAAGCATGCCATGTTTTCCAATTCATCCTACGGCTTGCATTTGTTCTCTCAGTTTGGCTCATGATTATCCCATTCATTACCTATTGGATATGGCGGTTAACATTTGTGAGAAGTCTTGGCGAAGCGCAGAGGCTGTTCTTGAGTCACATCAGTGCTCAGTTGATCCTCAGTGATTGCCTACACGGGTTTCTTCTCTCAGCTATCATTGTCCTTATATTTCTTGGAGCCACCTCATTACGGGACTATATAAGGCA…	gz_contig_2122	100	2891	gi|413943585|gb|AFW76234.1|
aj_contig_517	CTGGTGGTAGAGATCCTAAACTATGAAGAGAGGCATTCAACAATGAAACTCTCCCTGCCTTCCTTTCACTGATTGAAGAAACTCTGATGCCTACCGCTAAAGAGGCTCCCATTATACAAGGGGGGATTCTTTTCAATTTCCAGTTTACACTCAAGTCTGATACACTTGTCCTACCAATCATTATCTTCCACCGCTACCAAAATCTTTATTTGGAGTTACTGGCATGGCTCTTCAATGAGCAAGGATTTGGTGGTGGAATATGCCAATGAGCATCTCCTGCTAGGATTCAGCTCATTAGTGTAACTAATCTTTTAGTGCAGGAGAGCTGTTTCGCTGATCTCATCATGTTCCCATTTACAACAGCTGTCATCAAACTTGCAGCACCTGACAATGGATAAT…	gz_contig_7553	99.35	929	gi|242034479|ref|XP_002464634.1|
aj_contig_518	GGATCCGAGGCGCTTATGGAATTGGAAACCAAAAGGATATTACTTGACATTTTCAAGGAGCGGCAGCAAAGGAGTGCTCAAGCTGGTTCCATCCCAAGTTTCTACAAGAAGAAACCTGAAGAAGGATCCATTAGCCATAGAGTTCAGCGATTGGCAAAATATAGGTTTCTGAAGAAACAATCAGAACTACTTCTTAATGCTGATGATCTTGATGCCATGTGGGTTTGTCTTAGAGAAAATTGTGTTATTGATGATGCTACTGGTGCTGAAAAGATGAACTATGAAGATTTCTGTCATATCGCGACAGTGTGCACGGAGCAGATTGGGCAGAAATGCAAGCGCTTCTTCAGCCCTTCAAACTTTATGAAGTTTGAGAAGGATGATTCTGGGAGAATAGCC…	gz_contig_1935	100	1343	gi|357134649|ref|XP_003568929.1|
aj_contig_519	CACTAAAGTAGCATAGGACTACTGCATGTACTGAACAAAATAACATAATTCACAAGCTTCTCGAGTAACAGAACATCCTATGAACACACACTAAGAAAATATGGTCCTTTAGGATGGGGCCAAAATTGGATGCCCCCTGGTTTTGGCGACGCAAGAGCCACTGGTTTATTGTCTACAACATTCTGATATAAGTTCAACTAAGAGCACTATCTCTGGCAAAAGAACTAACAGACATGTTACATAAATTCTGACGCTCTCAAGATATACATGACAGAGAACCCGGGATGGCATGCCCATGGCTAATGGGCAGCGATTTGCCGATTTCTTTCATCTAATAAGATTACAGGCCAATCCTATACCAGTGCTCTTCTATACTAGCCTGTTACTATCAGAAAAGAA…	gz_contig_5530	99.94	5117	gi|242092808|ref|XP_002436894.1|
aj_contig_520	TTAAAAAGGACCGTCATTCTTTCCTGTATACAAACCTACAATACAACATGGATCTATGAACCATCAACAGGACGAATGGTGTGGGTGCAGAGTAGCTAACAGAAAAAACAAAAGCTTCTTGTTCTTGATGCACTTCTGTCTTTCAAGCCCTTGTTGAAGGCCGAGGTAGCAAGACGCTCTGAGGAATATGTCATAAAAGATGCTAGCGCAACACCGCCAGCAACCATTAATCCTAGCTTTGTGAACAATGCAGTTATGCCCAACAAAGTTGGTAATAGTACAGCAACAGTCACGATAGCAGCCATCCCAGTCCAGTAAAATGTTGCATCCACGTCACAGTCAGATGAATTTCGTTGATCGCCTGTAACCATATGATTCTCAGATGAATCAGAGTTGCTA…	gz_contig_19409	99.31	866	gi|242073706|ref|XP_002446789.1|
aj_contig_521	CTCCTCCAGGCAGATGGCTGGATTGTGAATCATATAACGTTACTTACAAATCCTAACCAAGTTAGGCCAAAGAGGTTTTGGGGCGTCTACACCAAGCTAAAGATATTCAATATGACAAGCTACAAGAAAGTTGTTTACCTTGATGCAGATACAATAGTAGTTAAAAGTATCGATGACCTTTTCAAATGTGGGAAGTTCTGTGGAAACTTGAAGCATTCTGAGAGAATGAACTCTGGAGTGATGGTTGTTGAGCCCTCTGAAACTCTTTTTAACGATATGATCAGCAAAGTGGCTGATTTGCCCTCTTACACTGGAGGGGACCAAGGTTTTCTCAATTCATATTATTCGGATTTCCCAAACTCCCGTGTTTATGAGCCGGACTCACCTTTGACCCCTGAA…	gz_contig_12764	99.06	1274	gi|242073706|ref|XP_002446789.1|
aj_contig_522	CCGCTACAAATACTAGACGAATCACCAATATTGAGCGAAAAAAGAACAAATGGATGTCTAGGATCCACTTCAAAGGGCCAACTGGTGGAAGACAAGCAGCAGAAAACACACACAGCAGCCCAAGTATCACAGCCAACCAAGTAAATATGGTCGGGCCATCTAGTTCGCTTCTCTTGCGATCCTGCCAATAAGAGATAGTTGCAGCCAAGCCTTCCCGTGGGCTCACCATAGGTACATAGCCCAGTTCCTCTCTCGCTTTCAGGTACGAAAAGTAGTGTGTAACACCCACCTTATAAACTTCAGCAGGAAGAATAAGAGGCTGAGGAACCCATTTACGATCTAGCCATGGATAGAATAAGGTTGATATGAACAAACATACTCTCGAGATGGTAAGGGCGA…	gz_contig_12295	100	1058	gi|242067541|ref|XP_002449047.1|
aj_contig_523	GGTCAACGGTGGTGCTCCGGCAGCTGAAGAGCTCGCAGGCGAAGCGCAGGGGCCGACGCGCTCTAGAGGTGCTGAAGAGGCTGGCACGCCGCCAGATGATGTATGACTCCTATGCACTGCAGGTCCATGGCTACATCACTTCAGACAATGCCACGGAGGAGGACGATGGCCCGTTCATCTTGGTGCATGGGTATCACGGTAGTTATTCATTGCGTCACTGGTTGCAACTCTCGGATTGGCTCCCAACCTTGGAAACAACATTAGCATTAGATGAAGAGCAAGTTAGGAGAGTAGGAGATGACTCAGTAGGAGGGTCTGCTGTAACTCGGCAGCTGCGTCTGATTAGAATATTGATGAGAGACCTTCTGATTGGTGTAAATTATCTGCATACCCATGGGC…	gz_contig_4250	99.64	824	gi|115438945|ref|NP_001043752.1|
aj_contig_524	CTTTGATTTTAGTCTCTCTTATATGGCCAACCTCAAAACCTGCACAGTTAAGTCTGTGGCCCTATATCACCACTCTTCAAAGATAGATCCCCATGTTTACTGGAAATATATTGATAAATGTATTATATATTGTTTGGTATGGTGAAATATGAAAGAAGAAAGTGCATGACTTACTTATTATGCCTTGTAAGGTAAGACATAAAGTTTCCTCAAGGTAGAAGGTGTCACAATTAAATCAAAATCTCACCCAGAAGAAGCAAGCACATAAAGAGCATAAACATTTTCCTTCTCAGTATATCATAGTTTTTGACATCAAATTCGCCATTACAAACAAATAGACAAATCACTCAATACAATAGTAATTTTGGTAAACTAATACGTAATAATTTCTTCCAGTTT…	gz_contig_2796	100	590	#N/A
aj_contig_525	CCGGTGGCGATTGGCGCGCTCAGCTCCAGCCTGAGGCTCGTAGCAGGATTGTCAAAAAGATAATGGAAACTCTGAAGAAGCACCTGCCAGTATCTCAACCAGAGGGGCTGAGTGAGCTTCAAAAAATTGCTGTGCGATTTGAAGAGAAGATATATACTGCAGCAACAAGCCAGTCTGATTACTTGCGGAGGATTTCTCTGAAAATGCTCTCGATGGAGAGCCAGACAAAGAACCCTGGAAATGCTCAAGTGATTCCAAGTCAAAATCCCCCTGGCACAGCACCTGGACTTCCTCCACAAGGCAGTAATCCAGCACAATCATCAGCAATCCCCTTGATGTCTCAGCAACAAACTCGGCAGCCAAATACTTCTACCTCAGTTCAAGGTTCTTCTCTCCCCA…	gz_contig_858	100	1163	gi|399529258|gb|AFP44686.1|
aj_contig_527	CCGGGATAGCATCCAAACTCCAAAGCAAAAGGGCAAACCACGTTAGAGGGCCGTGTAGTCTTGTATTGCCACGTATGTAACATAAACACAACATTATACAGCACCTTGTTACAGAAGACTTCAGTCAGGCACACTACTTGTACACCTCACCTGCTTCACGGTCAATATTTTGGACGAGTCAGTACGTGCACGAAGAGTAGTAGATTACACACAATATTGAGCCGTTCATATCCCAGAGCATCAACATGATGCTTTCCCCCTGAGTCTGGAATGTACGGCAGGGTAGACAGCACAAGCGCCCCAACGCCCATCCACAGTTAACGCTATTTTGTTGCAAAGGTGACTGGTATTACAGATCATGACATTCTGTTTAGATGAATGCTCTGGCTTTTTCGCGGC…	gz_contig_5182	100	800	gi|212722772|ref|NP_001131970.1|
aj_contig_528	CGCTCTTCGGGCACACCCCACCTCCCTCGAAGAGGCACCTCTTTCCGCCGCCATGGCCTTTGCAGAATGGCGTGCTGCCCTCGGCGCCTCTGGTACAGCCTTCGAACATGCACCTTTTGCCTCCACCATGGGACTTGCAAAAGATGGTGCTTCCTTGTGCCCCCTTGCTGCAGTTTGGATACTGGCACCGACGACCGCCTCCATGCGAGATGCACAGCCCAGGTTGTCCTTCCGCACTCCGAGTGCAGCCCTCTATCCGGCACCTCTTCCCTCCACCATGCTTAATGCAGAATCCTGATCTCCCCCGTGCTGCCTTCCCGCATCCCTCAATGCCACACCGGCTACCGCCACCATGAGCAATACAGAAATCTGTCTTCCCCTCGGCGCTCTTGGTGCAGC…	gz_contig_7910	98.5	1601	gi|414585189|tpg|DAA35760.1|
aj_contig_529	CGCAGAAACAAATCCTCTCATCATGCAAACTAAAATTAACAGCAGTCAAAGGATAGTGAACAGCAGAAATCCAGTCAGCGGTGTCGGCAAACGACAAGTGGACAATAATCTGTCAACCGGTAAACTAGTTTGTGTTGTGATCGGAAGAAAGCGTCTGAGCAGTAATAGTAGCAGGTAATTTCATGCCCCGGCCTTCCGGCGGCCCACTTGAGCCATAAATCCAGCTTTGATGGGAGCAACGGACCTTGACGAGCCACACTGTTCACAGCGAAGGAAGAACAACCGGTTCTCCTTGGAAAGAATTGTGTCTGGACTCTTGCAGCCATTGCATATGACATACTCATTGATATATCTCCTGAGTATTGCTTCAAAGTTCTTCGGAGCAAATCTTCCTTTGAT…	gz_contig_2901	100	1085	gi|115452845|ref|NP_001050023.1|
aj_contig_530	CGCTCCCGACACGAACGCGTTCTGACTCTTCTGAAGCTTCTCCGTTAGAAGCCGCCGGACAGGCCTTATCAGGAGGCGGATGATGGCGTCGGCTTCCAGGGCAGTCTGCTGCGTGCAGAGGCCGGTCTCCAATGGCAAGAGGAGCAGCGAAGCGGCCTCCGTACGCCGGTCGGCCGCGGCGCCGAGGACCCGGCTCGCCAAAGCGAGNNNNNNNNNNNNNNNNNNNNNNNNNNNNNNNNNNNNNNNNNNNNNNNNNNNNNNNNNNNNNNNNNNNNNNNNNNNNNNNNNNNNNNNNNNNNNNNNNNNNNNNNNNNNNNNNNNNNNNNNNNCTCGCCAAAGCGAGTGTGATCCGCTCCGAGCTCGGTTCAGGCCGGGCACAGCATTGCGCGCCTGCCAAGG…	gz_contig_409	99.89	2747	gi|380691806|emb|CCA60997.1|
aj_contig_531	CCTTCCTATTGTTGCCCACCCCTGTTCTGCGGTGCTACCACTTGTTCCTGCTGTGTCATTTGCTAATGGCCACTGCTCCTTGCCGACCGGTGTGCCAATTAAATTTCATGGGAGCTGTATGTTTTTATCGCAGCCTTGCCCCCACAAACCACTGAAATTTGTACCACCAATCGGCAGATCAAGATTTGTGATCAGAAACACTTCCTTGGGAACAAAATTGAGATCCTCCAGAGCAATTCGACGGCCCCAACCTCTGATCTGACCTCGAGAGGGGATCGAAGATTCCAAACGGCCCTCGTAGTTAGAGGAGAAAC	gz_contig_19177	100	305	gi|393786707|ref|ZP_10374839.1|
aj_contig_532	GAGAGCGGGTTGTTGGTACAGGTTCGTTTGGGATCGTCTTCCAGGCGAAGTGTTTGGAGACTGGGGAGACCGTGGCCATCAAGAAGGTGTTGCAGGACAAGCGTTACAAGAACCGCGAGCTGCAACTTATGCGTGCGATGGAGCACCCCAACGTCATCTGCCTGAAGCACTGCTTCTTTTCGACAACAACCAGGGACGAGCTGTTCTTGAACCTTGTGATGGAGTACGTCCCGGAAACGCTGTATCGTGTGCTTAAGCACTACAGCAACGCCAACCAGAGGATGCCTCTTATCTATGTCAAACTCTACATGTATCAGCTTTTCAGAGGATTAGCATATATTCACACTGTTCCTGGAATCTGCCACAGGGATATCAAACCACAAAACGTTTTGGTGGATC…	gz_contig_8111	100	1253	gi|195625258|gb|ACG34459.1|
aj_contig_534	ATAACCAGAATGCAGATAGTTATCCATCTTATAGAGGCAAAAGTACTTCTTTGGAAGTTTCTGTGCAGAAATCTTTTGCTCTTGGCGTCAAGTCTGAAAATAGTGTCAAACGGGATCATGTTGGGAATGACGCTGTCCAATCCTTGCATAAGCAAGATAGCAAGATGATAGCAAAAAAGACCATAAAGCTGTTGGACGGTCCACCTTGTTCAAAACGGCCAAAGCTTGAGTCCATACAAACTGTTAGAGACACCGAAGCGAAGAGGCATGATTCCATGTCGCAGAAGAATGTGCCTGAACTTCTACAAGGCACGCCATCTGAAAAATCCCGGTTGCTCAAGCAGAAGCGTGTTTCAGATGGAAGGAGAATTGATAAGAAGAATGTTAGGTCTGGTATTA…	gz_contig_10203	98.18	824	gi|242061242|ref|XP_002451910.1|
aj_contig_535	AGAACAGTTTCAAGGTTCCGTGTTAACTTGAAGGCTTGAAGCACAGAAGGCAAAATGGCAAGCCTGCATAATTTGATTTGCTCGGTCTCCAAACAATTGGTTGCACCAAATTTTGCGGCAGCGGCCAAGACGCCCTCAACGGTTATCAACGCAAGCTCAGGCGAGGCATCCTTGGATGGAAAGAATGTGACGAAAAGGAGATTAGCTTTGCTTGGTGCTGGAGTGTTAGCCACTGGCCTACTGAAGAAAAGCTCTGCATTTGCCGAAGAAGTACCACCGGAGAAATACAAGTCTTATGTAGATGCGAAAGACGGATATTCGTATCTTTATCCAGCTGATTGGAGGGATTTCGACTTCTTGGGTCATGACTCCGCATTCAAAGACCGCAATGTGGCGCTG…	gz_contig_5379	100	710	gi|297722003|ref|NP_001173365.1|
aj_contig_536	AAGAGCCAACCCTCCTTCGCCGCCGCCGCCGCCGCCAAGGTAGGAGAAGCCGGCGAAGATGAAGACCATCCTGGCGTCCGAGACGATGGACATCCCGGAGGAGGTCACCGTCAAGGTGGCGGCGAAGATGGTGACTGTGGAGGGACCCCGCGGGAAGCTGACCCGCAACTTCAAGCACCTCAACCTCGACTTCCAGCTGCAGGAGAACGGCCGGAAGCTCAAGGTCGACGCCTGGTTCGGCACCCGCCGCACCATGGCCTCCATCCGCACCGCCATCTCCCACGTCCAGAACCTCATCACCGGAGTCACCAAGGGATACCGCTACAAGATGCGGTTCGTCTACGCTCACTTCCCCATCAACGCATCCATCACCAACGGAAACACCGCCATCGAGATCAG…	gz_contig_1158	100	845	gi|242094384|ref|XP_002437682.1|
aj_contig_537	ACTACTCGAGATGCACGTACGCACGGCCATGGCGCGTCGTCGCGGCACCGTCCTAGTTCTCCTCCTCGTCGCGCTGGCCGGCATCGCCGACCTGGCGTCCGCCGAGACGTTAGGCTCCGTCGACGACCAGACAACGGCGGCGCTGGTATCGTCCGCGCCGTCCCCGGCCCCTGGCGGCGGCGGCGGGAACGCGGAGGACCTGAACGGCATCATGCAGTGCATGATGGGCTGCTTCACGCAGGTGTTCGGCTGCTCGTTCGGGTGCATGGGCAAGGGCCCCGACCTCCCGCTCTGCATCATCAGCTGCGACTCCAAGAGCGTCGTCTGCATGATCCGCTGCGGCCTCACGCCGTCGCCGCCGTCGCCCAAGCCTCCGGCACCCACGCCGCCCGGGCCCAA…	gz_contig_1352	100	434	gi|413922486|gb|AFW62418.1|
aj_contig_538	CACTTCCCTTCAAAGCCACTGCTTGAGTGTTCCTCTCTACTTAAGCGCACGCCTTGCTCTCGTGCTTCGATCAGTGCGGACCTCGCCTCACCTCTTCTTCCCGAGGTGTTGGATGATACGTTTTACAAGTTAAACATGGGTTCCAAGGAAGTATCCTCTCTCTTCTGCCTCTTGCTTCTATCCTTTGTGGGCTGCAAATGTCTGGCATCGGAAATAGAGGCCACCCAGACTGCAACCCTCAAGGTTGATGCTTCACCACAGCTTGCTCGACAGATCCCTGAAACACTGTTTGGGATATTTTTTGAGGAGATCAACCATGCAGGAGCCGGTGGAATATGGGCCGAGCTTGTCAATAACAGAGGTTTTGAAGCCGGAGGACCCCATACTCCATCAAACATT…	gz_contig_652	99.57	2114	gi|115483997|ref|NP_001065660.1|
aj_contig_539	CCGACTTTTGATTAATGCTTTGTGCATAAAGTGACTGTAATATTTACACATGGAAATTTACATGCTAATTTTCTAGATTTATACTGCACAATGTCATTTTCATACATTACAATTTACAACTAATAGAATGGTAGTAAGATACTTCATACTGTAACCTGACGAATATTCACAACCTACACATGCTGGAACACTGAATCCGAATATAGCATCAGTCTTTGTTACGAGAGGCCCGTTCCTTCTTTTGACCACCAAGAATTCGTGAAATTTGCAGTCCTCTACTGAAAGCTTGATTAAATAGCATCCGTGTCTGGAACTCGGAGACAAAGGGAAACCATGCCAAAATAGTAATTGGTGTAAATAGAAGCACCCCCATAATTATTTCATATGCCCTTGCAAGGG…	gz_contig_211	99.66	4475	gi|222624128|gb|EEE58260.1|
aj_contig_540	ACTGAGGCCAAATATGAACAAAAGAATTGTAAGCTCAAAAATAGCACCCTGAAACATTCTGTGTTGCTATACTATAGTAACTGTACTTATCTCAACCTCTAGCACGTATTGTTGTTGTATAAATGTAACTCCAGGCTGTATGTATGCTAAACGTAAATCTAGCGCCGGTTGGTTCTAAGTGACTTGAAATGTGCAGCAAACGAATCATAATCTGTTGGAAGCTTGGGGTGAACATGTGCAGGGGCGGTTTTTGAGGTGCTTTCTTTGGGAGTTCCTGGCGATGTTTCTGTGTTCTCATTTGATGGAACAGAATGTGTATCTATTTCAGCTTTTTCTGACTTCCCTCTAAAGATTGGAGACTCATTGCGCTCAGTTTTAGTTGGTCGCTGTACTGGAACC…	gz_contig_138	99.91	3314	gi|242054161|ref|XP_002456226.1|
aj_contig_541	AGAGTATGTTACAATCCGCTTAGTAATGTATAATAACACAAACACTTCCGAGATAATACAGCGGGCGCTTACACAATCATAGGCTCGTACTAAAATATGTTTTACAGCACTGGGCAAAACTCTTGCTGGATTCTCTCCTCGCCAACCTTTTTTGAGGCAGAATAAGTTAGCTCATTTTGACTATCATCCTATCGGCTATATGCCAAAATACGTTCAATGTGCAATTATCCAAGCTTTCCAATCTCCATCTTTTTCTTTATAGCACGATGTCCATGGTACACGAAAGAATCTATGATGCCAGCCACCGTGAAGATACCTCCGACAATTGCACATATGTTTGTCAAGAAGTGAAGGAGCGATGTATTTTCTTCTGTGAAGTCAACCTTGATTGGCGAGAAC…	gz_contig_4476	99.52	1253	gi|226498912|ref|NP_001150650.1|
aj_contig_542	CATCACGCTTTGCTCTACCAGCCATGCACAGGTGAAATGCAATGGCAAACTGGGAAACAAACAGCTGCTACAACAACCCCAAGCATGCCTGGTTGACTGAAACCAAAGAGAAATAAACATGCATACAAGATCAGAGAACTTAATACTCTTCTTCATCATCATCTTGGACATCAGCTCCGACTTCCTCATAATCCTTCTCAAGAGCAGCCAGATCCTCCCTTGCTTCTGAGAACTCCCCTTCTTCCATCCCTTCACCAACATACCAATGGACGAATGCACGCTTTGCATACATGAGATCGAACTTGCGGTCAATGCGGGAAAAGACCTCAGCCACAGCCGTGTTGTTGCTGATCATGCAGACCGCTCGTTGCACCTGGGCTAGGTCCCCTCCAGGGACCA…	gz_contig_5160	99.75	1214	gi|6094430|sp|O22348.1|TBA2_ELEIN
aj_contig_543	TGCTTCATACATTCTCAGTGCATATTATAAGACGTTGAATATTTCTCCGAAAGGGAATTGTGCTTGAAAGATCTTAAAAAGCATAAGTAGACATACGTCTAGTCATAGCCAAGGGAGAATGCACAATCCTTTCCCCTTGTTTTGCAGAAGAAAGCAACATCCCATGATAACAAGAAATACTGCTACAAAGTTATTGTGACACTGAAGACCAGTGACAATTCATTACATGTAGAGGCCATCAGGGACGCCTTCCTTCTTCTTGTACATCACCTTCTCCTTTGCCTTTTTGAAATCTGCATGTGTCACCTTCATCCTACGCTCTCTAAGTGCAAGCAACCCAGCTTCCGTGCATATGGCTTTAATATCAGCACCTGAAAACTCATCCTTGGTCATCACAAA…	gz_contig_3880	100	968	gi|414888225|tpg|DAA64239.1|
aj_contig_544	CGTGGCCTTCTCCCCGCTTGGACACACAGAGCCGCCGTGCTCTGACGTCTAGGTTTACAGTCGCCTGCGCCGCGGAGAGCGAAGCGGAGGCCAGCCTCGCCTTCGCCATGGCGGACGACGAACCCGTGGAGAAGAAGGAGGAGGTCCCTGAGCTTACTCCTTTCGATCCGACAAAGAAAAAGAAGAAGAAGAAGGTTGTCATCCAAGATCCATCTGATGAGGTGGACAAGTTGTCTGAAAAGACAGAGAGTTTGACAGTCACCGAGTCTGGTGAGCCAAGCTTTGCAGGCATGAAAAAGAAGAAGAAGAAACATGTGGAACTTGATCCGTCTCTTACTGAAGCTGCAGATGCTGATGACGCAGCTGGTGAGCAAGTTAGAGAGGATGAAGAAGGTGAAG…	gz_contig_2900	98.57	839	gi|115452845|ref|NP_001050023.1|
aj_contig_545	CAAAAGAGAAGTTTTCCTTGATCCTCTTCAAGTAAAAAAGAAATGGAATACAAATCATTCAGCAGGCCTCCAGCCCAACAAGACAGAATAAAACAGTGACCTCCTCTTGTAGAGAAATTATTTTATTCAAAGGCTATCAAAGTTACAGAAATCAGAAAACCATCAGGAAAGGAAATTCTGCATCATGGTTTTCTTTAGTCAAAAGGCAGTTAAAAATCAAGGGGTTGCCTCAAGAACATCTCCATTTGCTTCGCCCTAGTCTTGATGGACATATCAAACACCTTCTGGCCAAATTCAATCACCAGTCCGCCCATGATGCTGTAGTCAATCTTCTGTTCAACCAAAATGGTTTTGTTCTTCCCCAGGATATCTTGCAAGGTTTCCTTGAGTTCTTTCTCC…	gz_contig_3979	98.53	815	gi|51535416|dbj|BAD37315.1|
aj_contig_546	TTGCACATTACAAAAGCCAAATCCACATTTTCAGATGTCACACAAAGATCCCCAAAAATATAGAGGGCATTTAAAAGTTTATAGACAAAGATTTTTAACGCCAGTAAAGATATTTTGATTGTTTCCCAGACGGGAGCATAACGAGACTAATCTAAACTAGCTGCACTAACTTGTACACTGATACCGCCGGAGATCTTGAATATTGCTAAGGCTAATGAAATATCTAATGCTCACATAGACTTCAAACCCCATATTTTGAGTTAGCGAGGAATGAAGCAGCTACCAAGCGTTGAACTAGACCTAAGAATGTTGTAGTCAGATGAAAAGGTTAGAAGAAATTAACATCCAAAAGTATACGACCATCTATGTGCACCAACACCATATTTCTGCAGATGATTA…	gz_contig_2403	100	1685	gi|326505028|dbj|BAK02901.1|
aj_contig_547	AATCAGAGAGGGTGTGGTATGGCTCGAGGTCTGACTGAGAACAGGACCAGGAGCACCCTACTTGTAGTTCTAGTCTTTGGCCTCTGTTCCTTCTTCTACCTCCTGGGTCTGTGGCGGAGAAGTGGTTCTGGAGGAGGAGACAGAATACAAACCTGGGTGAATGAGCAGACAAAATGTATACAGATCACAAATTTGAGTTTTGAGACTCATCATAGTGCTCCAAACCTCCCTAATGGTACCATAAGTTCAGAAGTTAAAGAATTTGAGCCATGTGGTGAGCAGTACACTGATTACACTCCATGCGAGGAGCAAAATCGTGCAATGACCTTCCCCAGGGACAACATGATATACCGGGAGAGGCATTGCCCGTTGGAAAAGGAGAAGCTTCACTGTCTTATT…	gz_contig_10243	99.67	911	gi|413955331|gb|AFW87980.1|
aj_contig_548	CAGTGCCCTCCCTTGGATCAGTCAATCTCTAAGTTTAAGAAGCGTAAGTTCATCAAGTTCATTGGTAAGAAGACAAGGGAGAACATAAAAGAGAGGGCTAAGGAGAGGGCCATGAATGATAAGGGAAAGGAGATGGAGCATGATGCTGGAAGGAAAGGAAAAGGGAGTAAGGTTGTCACCAAGAAGGGAGGAAAGGTGGATAATAAGGCGG	gz_contig_25945	100	74	#N/A
aj_contig_549	TCAGCCGCTACCGAGGCCAATATCGACAAGGTCTCAGGCACGGGTACGGCGTGTACAGGTTCTACACCGGGGATGTGTATGCTGGAGAGTGGTCCAACGGCCAGAGCCATGGATACGGTGTGCACACCTGCGAGGATGGTAGCAGATACATCGGGGAGTTCAAGAGGGGCGTAAAGCATGGTCTTGGCCACTACCATTTCAGGAATGGTGACACATATTCTGGAGAGTACTTTGCTGATAGGATGCATGGGTTTGGAGTCTACAGTTTTGCCAATGGCCATAGATATGAGGGAGCATGGCATGAGGGCAGAAGACAGGGTTTAGGCATGTATAGTTTCAGAAACGGAGAGACACAAGCAGGCCATTGGCAAAATGGCATTCTCGACACTTTAAGCACCC…	gz_contig_5143	98.06	464	gi|226499782|ref|NP_001152273.1|
aj_contig_550	GACCAGAAACACCCTACTTGTAGTCGTAGTGTTTGGCCTTTGTTCCTTCTTCTACCTCCTGGGTCTTTGGCGAAGAAGTGGTTCCGGAGGAGGAGACAGAATACAAACTTGGGTGAATGAGCAGACTAAATGTGTACAGCTCACAAATTTGAATTTTGAGACTCATCATAGTGCTTCAGGCCTCCCTAACGGTACCAGCAGTTCTGAAGTTAAAGAGTTCAAGCCATGTGGTGAGCAGTACACTGATTACACTCCATGTGAAGAGCAAAAGCGTGCAATGACCTTCCCTAGGGACAACATGATATATCGGGAGAGGCATTGCCCGCCTGAAACGGAGAAGCTTCACTGTCTTATTCCAGCACCAAAGGGTTATGTTGCTCCTTTTCGATGGCCAAAGAG…	gz_contig_9435	99.77	1280	gi|242040779|ref|XP_002467784.1|
aj_contig_551	CCCCGGGTGGGCGCGTCTCATATTTTATGGCATACAACATTACCTGTCAATAGCTGGTTCACTTGTTTTTGTTCCTCTGATTCTGGTACCAAACATGGGTGGATCTGATGAGGACACTGCAACAGTCATATCCACCATGTTGTTGGTCTCAGGTCTTACAACAATAATTCATACATTTTTCGGCTCCCGGCTTCCACTGATTCAAGGAAGCTCTTTTGTATATTTGGCTCCTGCATTAGTAATTGCAAACTCCGAGGAGTTCAGAAATCTTAGTGAAAATAAATTCAAGCACATAATGAGGGAACTACAAGGGGCTATACTTGTTGGTTCAATTTTCCAGATAATCTTGGGATACACTGGTCTTATGTCACTGTTTTTGAGGTTAATAAACCCAGTAGT…	gz_contig_10641	100	1847	gi|242045690|ref|XP_002460716.1|
aj_contig_552	TGTTCAGCTAACCTCGTAGCAAGGACAAGGTGGCTTTGCTCCAATCTATCGATTGAACAGTCTGCCCAATTGCATCCATGATAACTCAGTATACCAATCGTCCAAATTGCTTACTGAAAATCAGATTTCGATTCTGGAAAATCATCTGCTTTGATTCTTTTCCCTTCTTGGTTTGCTGTTTAACAAATATCTGAGCATCTTTTGTGCTTCCTGCGATCTGTACTTCTATATCCTCTCCAAATGCTTCTTTCTGTCCTAACAGCTCGGCTGCATGATGCTGCTTAAGTTTCTTGGTATGCTGCATGCCAAGCTACTGCTGCCCTGGTAGTGACGCTTTCTGTAGCGGTTTCAAATGTGATGGGAGGCTTGAAAGGAACGTTTTCTGATTAGCAATTGTCT…	gz_contig_12886	98.85	260	gi|413939068|gb|AFW73619.1|
aj_contig_553	GAGGGAGACGGAGGCGGCTAAGGCGCCAGTGGACACCACTACGCTGCAGCTGCACAACCTGCTGTACGAGAAGAACCACTACTTGAAGGCCATTAGGGCGTGCCAGGACTTCCAGACCAAGTACCCGGGAATAGAGCTCGTGCCTGAAGAGGAGTTCCATCGTGCCGCGCCAGCTGACATCCGTGAGAAGACCCTCGCTGCTGACACCGCCCATGACCTCATGCTCAAGCGCCTTAACTTTGAGCTCGTTCAGCGGAAAGAATTGTGTAAGCTGCACGAGAAATTGGAACAACAGAAGAGCAGTTTACTGGAGACGATTGCTAATCAGAGGAAGTTCCTTTCAAGCCTCCCATCACATTTGAAATCACTGAAGAAAGCATCATTGCCAGTGCAGCAGCA…	gz_contig_4455	100	2252	gi|242063188|ref|XP_002452883.1|
aj_contig_554	CAGGCAGGTGTTGCCGCGAACGGGTCTCCGGTTATCAAGTCCAAGAACGAGATGAGTCCAAATGGAGCTCTCGGACCGATCATAACTGACAAGGCACGGAAAGACGTGGCAACCAATGCCAGTGCTGACTCAAGTGGATCCAGAGCTGGCCTATTTAGAACACCTATATCTGGTGGCGTCCAGAGCGCAACCTTTGCCCATGGTTTGCCTCCACCAGCTTTGGCTGTTCGCAACTTGATGGAACAGGCCCGGTTTGCTCACCTGTGCTCTGTCATGTCTGGCATGCACCACCGCCGTACTGGATATCCATTCGGTTCACTTGTCGACTTCGCCAATGATTCGATGGGCCACCCAATATTTTCGTTGTCGCCATTAGCCATCCACACTAGGAACTTGCTC…	gz_contig_4557	99.72	1064	gi|326518470|dbj|BAJ88264.1|
aj_contig_555	CCGCCGTGTCCCGTTCCCGTTCCGGAGGGAGGAGGAAAAAGAATAGGCCAACGAGGTCTTTTGCGACAGATGAGGGGACGCTGTGGAAGACGCTGCCCGTCTCACCCACTGGACGGGCTGAGGCTTGGGGCAGGCTCATATCCCAATCATCTGAGTACCCTTCGGTTCATATTTGTTCTACTCATTTCACTATTGGCCATGGTGGAAAGTACGACTTGAAGCTCACCGAGGCATCTCCTGGCTCACTTGTTTGTAAACTGAAGCATGTTAAGAGGGGTGCTGCCCTTGAGATATATGTATCCAAAGTTGTCCATGTCAATGGGAAGGCCTTGGACAAGGCTTCTAAGGTCACCCTGATAGGAGGCGATGAAGTCATTTTTAGTTCACTCGGGAGGCATG…	gz_contig_728	99.41	2552	gi|242046886|ref|XP_002461189.1|
aj_contig_556	ACCTTGATTTCGACTTCAGCAAGGCCAAGAAGAAGGACATGGGGGCCCGCCCAACATCTGACAAAGACGAGGACCTCGACATCGATGAGCCTGCGCCACTACCCCCAGACGTGGCTGAGGAGGACGAGGGTCCCCCTGCCGCCGCTGCTGCAAAGAAGTCTAAGAAGAAGAAAAAGAAGGGTGCCTTCACTGTGGATGATGAAGACATCGACAGGCTCCTTGCTGAGATGGAGGACCCTCCTCAGCGTTCATATGAGGCTGATGACCCACAGGAAGTGAAGAGTGAGGATCCTGTGGATGCCCCTGATGTGGATGATGCCGCGGGAAAGAAATCAAAGAAGAAGAAAAAGAAGGGGGGATTTACCGTCGATGATGAGGATACAGACAAGCTCCTTGCAG…	gz_contig_734	100	1160	gi|413948679|gb|AFW81328.1|
aj_contig_558	ATTCCCATAGGTTGTTGGTTCATGCCCGTCCCCATTGGCTGTTGGTTCATTCCCATCCCCATCAGCTGTTGATTCATTCCCAATCCCATCCCCATGCCCATTGGCCTGTTCATTCCCATTCCACTACCGTAACTGGCACCACCACCCATACCCATACCCATGCCCCTTCCTGCGCCCATTGGGTTGGAAGGAGGTGCCATGGCACCCGCACCAGCACGACCAATGCCAGAACCAGCTCCCATGGCTTTGCCCATGGTGACAGTAGACGCTACAGGTGGCTGGTTGGTTTTCTTTTCTTGCCTTTTCTCCTTGCGATTGATTGAATCAAAGTCAACTCCGATATCAGCATGTGGATTTGCTTTCGGTCCAGAAATGTCCAGATTCACTAGACCTCGGGTC…	gz_contig_1110	100	1583	gi|242066910|ref|XP_002454744.1|
aj_contig_559	GAATAAAGCACGTTAATGATCTGCCATGGCCAGATAACCAAAGAGCACCAGGCTCTATTTCTTCTCAAAGTTATCGTAGCTTTTTTTTTTCCCTTCACCATTACATAAGCAACAAAAACAAGGGATAACAGAGAATAAATCCTCTTAGTCCTCTAGGTAGATGACCAAAACACAGTACCATTAAAAGTACTTATTAAGAGAGTACAACACAGAGGATAAATGATACCAAGGGGCAGCTTAAAATCACAACGGAGAAGCAAGAAAGCATGATAACGTGACAGACCAAAAGCTTCTGAAAGGGTGGGTGCCTTAGGCAGAAGGCTTTTCCCACTTCAGGGGCTTCACCACCTCCCAGGTGAAGTCCGGGTCATCCCTTCCGAAGTGACCGTAAGCCGCCGT…	gz_contig_4630	99.8	1484	gi|288300148|gb|ADC45377.1|
aj_contig_560	CACCCCACATTCTCTTCTCCTAACTCTTGCCCGTCGCCCCGAATAAACAGCAGCAGCTAGCGCAAGAGTTAGAATTTACCCAAGTCAGCAATGGCGGCGGAGAGCTTCCTGTTCACCTCCGAGTCCGTGAACGAGGGCCACCCCGACAAGCTCTGCGACCAGGTCTCCGACGCGGTCCTCGACGCCTGCCTCGCTCAGGACCCCGACAGCAAGGTGGCCTGCGAGACCTGCACCAAGACCAACATGGTGATGGTGTTCGGCGAGATCACCACGAAGGCGAACGTCGACTACGAGAAGATCGTGCGCGACACCTGCCGCAACATCGGGTTCACCTCCGACGACGTCGGCCTGGACGCCGACCGCTGCAAGGTGCTGGTGAACATCGAGCAGCAGTCGCCC…	gz_contig_6910	100	467	gi|239050557|ref|NP_001132867.2|
aj_contig_561	CAAACCCTAGGTGAGCTCTCCTCCACACGTCTCTCGTCGCGGAACCAGTCGATTCGAGCTTGAGCCTGGTAGAAGCAGAAGAACGAGCATTAGCCATGTCATCATCACGTTTCTGGGGACAGGGAGACAGCGACTCTGAGGAGGAGGAAGAAATTGAGTCAGAACAGGGCAGTGACAGTGATGACAATAGAGGTCATGATGATGATAAACGCCCTGGAGCCCACAACCGTTATCTGAGGACTGAGGATGATGACAGTGATGAGTCTGATTCTGGACACCGTGTGGTTCGCTCGTTGAAGGACAAACGCAATGAGGAGATGAAATCTATTGTTGATCAGATGCGCAATGCCATGAAAATTAACGATTGGGTTAGCTTGCAAGAGAGCTTTGAAAAGCTTA…	gz_contig_377	100	875	gi|414585257|tpg|DAA35828.1|
aj_contig_562	GTATTCCCTCAGCTGATCTAGCAGAAAACAATCACCTCTATCTGATATTAGGATTATAGAAGTCAGGAACATCACACAACAAATAACCAACAAGTACTAAGTTCTACAGCTCGTGACGGTTCTCAGTTCTAACCATGTAAACAAATCTGGGGAGCGGTAGAGGTGACATGACGGCTCCCATCATACACTCAAAATATAAAGGCAGGTTCTCAAAAAGAAAAACAGGCACCGTAATGACCAAAGATGTCAAAAAATATGCCTCAGTCAACCCTTCGGGACCTCCGGCGTGGGGCTGCGGTCTCCTCCTTCTCGTCTTCATTCTCGTCCTTGTCACCACTGCTTCCAGCATCCGCTGTCTCAGTGGCCTTGGGCTTCTCCGCCTCAGTGGCAGGTCTCACA…	gz_contig_1688	100	1124	gi|226528152|ref|NP_001150317.1|
aj_contig_563	TGCAGCATAAACACAAGAATTCTTGTCTTGCAAAGTTTCTAGACAGGGTCTGGTGAACAAAATATGTGAAACTAGAATCAGAAAACGACAATAGGAGGGCACATTGCTCATCATTAGTCCTTCCCATCGAAACAAAGGAAGCTATAGATTTCATTCAACTGAGGCTAACTTAGGTCATCCGCTGCGCAGCCTCCTTGGCGAGCAGCTTTTCCCTGGCCCTGGTCTTGGCCTGCGACTTGGAGCCCATGATGCCGCCTCCCCACTTCTTCCTCACTTCATCGTACTTGTCGTTGAAGTTTGCCTTAATAGCCTCCAAGATCTTGCTGAACTCAAGTTTGTCCTCATTCTTGACAGTGGTCAGGCACAGAACAGATGCAGTCTTCTTGTGAACAATCGAAC…	gz_contig_9460	99.59	734	gi|212274547|ref|NP_001130097.1|
aj_contig_564	GTCAAGATATCCAAAATCTCTCATATTCTTTGGTGTTACGTTCTGATGTCCACAAGCAAGAGTTGTCAAATGATACAGTTTGACGAATCCACATATACTCTGTGGTGGTACCTCTCCCAGTTTCACAAAACGAAGGTGATATAGCTTTGCAAGTTTGTCCGAAAAATCAGATGAGTGGCACAGTGTTGATTCAAATAGACGCAAAGACTTTGAGCTCTCTACAAGTTCCTCTACTGTTTTCAAAGCATCTGTTTTAATATTCTCTTCCATATAGTTGGGGATAATAATGGTGCGTAGATTTTCCATCAAAGTGATTTTCTTGATCTTTTCCACAGGAAGATTACTCATATTTTCAATACATATGTGTCTAACTGTGTTTGGTGCATTGTCAAGGCTGGA…	gz_contig_777	97.75	1064	gi|77553903|gb|ABA96699.1|
aj_contig_565	GCTCCGAAGAGAGGTGGCAGGGCCCCGGTCCCGGCCAAGAAGAAGCCGGAGAAGGTGACGAACCCGCTGTTCGAGAAGAGACCGAAGCAGTTCGGGATCGGCGGTGCGTTGCCACCCAAGAAGGACCTTCACCGCTTTGTCAAGTGGCCCAAGGTCGTGCGCATCCAGCGCCAGCGCCGTATCCTCAAGCAGAGGCTCAAGGTGCCCCCGGCACTCAACCAGTTCACCCGCACCCTCGACAAGAACCTTGCAACAAATTTGTTCAAGATGCTTCTGAAGTACCGCCCTGAGGACAAAACTGCCAAGAAAGAGAGGTTGTTGAAGAGGGCTCAAGCTGAAAATGAAGGGAAGACAGTTGAGGCAAAGAAACCCATTGTTGTCAAGTATGGCCTTAACCAT…	gz_contig_11502	99.64	827	gi|226502084|ref|NP_001147139.1|
aj_contig_566	GAAAGCGGCCTTCTCCCCAAATCTCTCGTCCTCGTCCTGATCGCCGCGCCCCCCGACCAACAACACATTGCTTGTTCCCCCAAGCAAAGGAGGAGGAGGAGGAGGAGGAAGAGCACGAGACCAGCCATGGATCCCTACAAGCACCGCCCGTCGAGTACCAACAACGCCAGAATCTGGACCACCAACTCCGGCGCCCCCGTCTGGAACAACAATTCTGCTCTCACCGTCGGACAGCGAGGACCCATCCTCCTCGAGGATTATCATCTGATTGAAAAGCTTGCCCAGTTTGACAGGGAGCGTATCCCTGAACGTGTTGTACATGCACGGGGAGCCAGTGCCAAGGGTTTCTTTGAGGTCACTCATGATATTTCTCACCTTACATGTGCTGATTTTCTCCGT…	gz_contig_68	100	1880	gi|363543189|ref|NP_001241808.1|
aj_contig_567	TGCGACTTGGCCACAGTTGCTCTTGAAATTCTGAGGGAGAAGAGAAACAAGTTTGACATCGTAATTAGTGATGTCAATATGCCTGACATGGACGGTTTCAGGCTTCTTGAACACATTGGACTCGAGATGGACCTACCTGTTATAATGATGTCCATCGATGGAGAGACAAGTAGGGTGATGAAAGGTGTCCAACATGGTGCTTGTGACTATCTCCTTAAGCCTGTACGGATGAAGGAACTCCGGAACATTTGGCAGCACGTATATCGGAAGAAAATGCATGAGGTCAAAGAGATCGAAGGTCACGATAACTTTGATGATCACCAAATGTTCAGAAATGGTTGCGAGGGATTCGAAGAGAGGGGCCTGTTTATGAGATCTGAATCTGATACCATGAGGAAG…	gz_contig_8180	100	1364	gi|242059591|ref|XP_002458941.1|
aj_contig_568	GATCAAGGTACCAAATATCACATAGTTGTGATCCAATATAACACTGGAGCCTGACAGCAAAACTGGAAGAAAAAAAAGAGGCAGATGCCATTCATGGCCAAGACTTGCTACTACAAACAACTTTGAGGCGGCAATTTGCATGAACCAATCAACCACCGGTCCCTTCCAATTCAGAGAATCTCATGCAGCCTGATGTAAGGAACTGAGACCTGCTAGACCACCTCCCAGTCCCCTTCGATGAAGGGGATACCATCTACTGCATGCTCCGGCCTAAACATGTCAACAACAATGTCATCTAAACCACCAGAGAGTCCCCTTTGCAGCCTACGTCTTCCCATGAGTTCATTGTTGTAGTTTAGCTGATTACTAACAGCTTGCTGATCAATCCTCCCATCCTGC…	gz_contig_10372	98.73	1178	gi|242064244|ref|XP_002453411.1|
aj_contig_569	CCGGAGCATCTACGCCAAGGACGGCCTCATGGAGCTGCCAAAGGACGTCCAGTCGCCATGGGACTTCTTCAGCCGAGCAGTCAAGAAGTACCCCAAGAACAGGATGCTCGGCCGGCGCCAGGTTACAGACGGCAAGGCCGGTGATTATGTTTGGCAAACCTATGAGGAGGTGTACCAGAAGGCCTTGAGGGTTGGATCAGCCATCAGAAGTTTCGGCGTTAACCCGGGGAGCCATTGTGGGATATACGGATCTAACTGTCCAGAATGGGTTATCGCCATGCAGGCTTGCAACAGTCAGGGAATATGTTACGTGCCACTGTATGATACCCTTGGAGCAAATGCAGTTGAATTCATCTTGGACCATGCTGAGATATCTGTAGCCTTTGTCCAGGAGAGCAA…	gz_contig_1709	100	2177	gi|242068851|ref|XP_002449702.1|
aj_contig_570	AAATAAAGATCCTCGATAAATAACATCGCCAAATGAAACAGGTGTACGTAGTAGGAAGTTACAGTCAGGCAAAGGCTGATGCAGCTTGGTACTAAACGAGTTCAAAGTATCACGACATAAGTTGATATTATTAGGCAGCCACCACCCAGATGCTGAAGAATCACCGAAGACAATAGGCGTAGCCTAGGCGACGCATCTGCATCTTCTGGCAAATCTACCTGAACACCTCTGNNNNNNNNNNNNNNNNNNNNNNNNNNNNNNNNNNNNNNNNNNNNNNNNNNNNNNNNNNNNNNNNNNNNNNNNNNNNNNNNNNNNNNNNNNNNNNNNNNNNNNNNNNNNNNNNNNNNNNNNNNNNNNNNNNNNNNNNNNNNNNNCCTCTGATATATACAAGACGGGGGT…	gz_contig_1047	100	3188	gi|66269682|gb|AAY43218.1|
aj_contig_571	AAGAAGGACCTGCACCGGTTCGTCAAATGGCCCAAGGTCGTGCGCATCCAGCGCCAGCGCCGCATCCTCAAGCAACGCCTCAAGGTGCCGCCGGCGCTCAACCAGTTCACCCGCACCCTCGACAAGAACCTTGCAACCAACCTGTTTAAGATGCTCCTCAAGTACCGCCCTGAGGATAAGGCTGCCAAGAAGGAGAGGCTTTTGAAGAGGGCTCAGGCCGAGAATGAAGGGAAAACTGTTGAGGCTAAGAAACCTATTGTTGTGAAGTATGGCCTTAACCATGTGACTTACCTCATTGAGCAGAGTAAGGCCCAGCTTGTTGTCATTGCTCATGACGTCGATCCAATTGAGTTGGTTGTCTGGCTCCCAGCCCTTTGCAGGAAGATGGAGGTCCCTTAT…	gz_contig_3538	100	653	gi|212274547|ref|NP_001130097.1|
aj_contig_572	GTTAAGTGAGCCGCTACAACATAATAGGCCCCCAACACAAACAACTGGAGATTTGTCCCCAGCTGTGACTGCAACTGGGAATCTAGATTAATAATGATTAAACTTCTTTCTGTGGCGACTGTAATCTGAGACATATCTAAACGTCTGCCCGCAGTCTGGAGCAGAGCACTTGTAGGNNNNNNNNNNNNNNNNNNNNNNNNNNNNNNNNNNNNNNNNNNNNNNNNNNNNNNNNNNNNNNNNNNNNNNNNNNNNNNNNNNNNNNNNNNNNNNNNNNNNNNNNNNNNNNNNNNNNNNNNNNNNNNNNNNNNNNNNNNNNNNNNNNNNNNNNNNNNNNNNNNNNNNNNNNNCCCCTGTGTGCACTCTGACGTGTTCAGTCTGAGCCCACAGCCACTTGAAAGT…	gz_contig_11320	100	2333	gi|293335996|ref|NP_001167851.1|
aj_contig_573	TGGCTGGAAGAAATAAATCTTGGTAGCTACAGGCAAGTCTTTGAAGAAAATGGTGTCAATGGAGAATATCTTGAAAGCCTATCTATGTTCACTACCGAGCAGATTCTGCGATTTATCAGGCGATGCCACATGAAATGGGGAGACTTTATCACACTGTGCAAAGAGTTGAGGCGCATCAAAGTTGCCTGCCTGAAAGGGGAGCAAGAAGTCCGCAGGCCTTGGTGGGCGCCATCATGCCTCTCGGTGGTGTTTGTGAGGGCAGCCAAGCGGAATAGGCAGTCCCGGGTTGTTTCCTTGAAGCTGGAACTATGATAACAAGCACTCTGAACGCATTGGCCAGTCTCCTATCTCCTCCAGCTCCGTCAGAGGCACCTGAGNNNNNNNNNNNNNNNNNNNNNN…	gz_contig_5577	100	335	gi|218186951|gb|EEC69378.1|
aj_contig_574	CTCGAGAATATTCCTCCCACAGTCAAAAACAGCTTTCAGACGACTTAGGGTTAAGCATGCCCCGGTGTGTGCTCAGGGGCCTACGGTGCAGTTCGAGGAGAACGGCAAAGGTGGATAATTGGAATTTGGAAGTGCTTGTTGTTATGGTTCCAGCTTCAAGGACACCACCCGGGACTGCCTGTTCCGCTTGGCCGCCCTCACAAACACCACCGAGAGGCATGGCGGCGCCCACCATGGCCTCCGAATTTCTTGCTCCCCTTTCAGGCAAGCAACTTTGATGCGTCTCAATTCTTTGCACAGTGTGATAAAGTCTCCCCATTTCATGTGGCACCGCCTGATAAACCGCAGAATCTGCTCGGTGGTGAACATGGATAGGCTTTCAAGATATTCACCATTGAC…	gz_contig_7257	98.53	203	gi|218186951|gb|EEC69378.1|
aj_contig_575	CGACGTGCCGATCGTCTCCGGCTCTGCGCTCAAGGCACTCGAGGCCCTCATGGCCAACCCCAACATTAAGCGCGGGGATGACGAGTGGGTGGACGGCATCTTCTCCTTGGTTGATTCCGTGGACAACTACATCCCCGTCCCGCAGCGGCAGACCGACCTTCCGTTCTTGCTCGCTGTTGAGGATGTTTTCTCCATCACTGGTCGTGGTACTGTCGCCACTGGCCGTATCGAGCGTGGCACCGTCAAGGTTGGTGACACAGTCGATGTTGTTGGAATCAGGGACACCCGGAACTGCACGGTGACTGGTGTAGAGATGTTCCAGAAGACCATGGATGATGCCATGGCTGGTGACAATGTCGGGCTGCTGCTCCGTGGTATGCAGAAGGAAGACATTGAGAG…	gz_contig_14191	100	722	gi|297721387|ref|NP_001173056.1|
aj_contig_576	GAGTGGGTGGACGGCATCTTCTCATTGGTTGATTCCGTGGACAACTACATCCCCGTCCCACAGCGACAGACTGACCTCCCGTTCTTGCTCGCTGTTGAGGATGTGTTCTCCATCACTGGTCGTGGTACAGTTGCCACTGGCCGTATCGAGCGTGGCACAGTCAAGGTTGGTGACACGGTCGACGTTGTTGGAATCAGGGACACCCGGAACTGCACTGTGACTGGTGTCGAGATGTTCCAGAAGACCATGGATGATGCCATGGCTGGTGACAATGTCGGGCTGCTGCTCCGTGGTATGCAGAAGGACGACATTGAGAGAGGCATGGTGTTGGCGAAGCCTGGTTCAATCACTCCGCACACGAAGTTTGAGGCTGTTGTGTATGTGCTGAAGAAGGAGGAG…	gz_contig_8841	98.44	767	gi|297721387|ref|NP_001173056.1|
aj_contig_577	GAAACTTCCTCCTTCTTTGTAGTTGCTTTTGAAACATGAATGTCAAGTATTTCACAAAAATCAAGCAACTTCTCCTTGTTAAATTTGTCAAGCTTTTCCTTTATCCTGTTCCGATGTTTTTCTTGATTGTCAGTCCAAACAAAACCAGAAAACTGGGATATGTTTCTCTTTAAGAAGTGGACATTTGATTTCTTCCCGTACATTAGAGTATGGAGACTCTGTAGATTCTCATCTGCCTTTCTCTTTGATAGTTTGAAGGAAACATTTGGGATGTCCTTGAGCTTCGTTCCAGATCCCTGGAGGATAGCAGGGGACTTCTTGACCGGCGTGACGCGAGGAGCGAGCTCGGAGTACCTCTCGACNNNNNNNNNNNNNNNNNNNNNNNNNNNNNNNNNNNNN…	gz_contig_10537	100	359	gi|218189638|gb|EEC72065.1|
aj_contig_578	GAAGTACAGAGTGACAAAGCAACAATTGAAATAACAAGTCGTTTCAAGGGAAAAGTACATCAGATTCTCTTTGCCCCTGGGGACATAGTGAAGGTTGGTGAAACTTTACTGAATATGATTGTGGGTGACAGCCAAGTTGTATCACATGATGATATAGCTCCAGTGCCTGATAAACCACTTGGAGTGGATTCTACTAATTCTTCAAGTGAAGCCAGTTGTCCCAGTGGAACTCTCTCAACACCTGCTGTTAGGCATCTAGCAAAGCAGTATGGGCTCAACATAAATGAGATTCCAGGAACTGGAAAAGATGGTCGTGTTTTGAAAGAAGATGTGTTGAATTATGCTATCAACAGGGGTCTATGCAAAGAATCATCATTAGTTTTGGAGGACGGCATTGAG…	gz_contig_14284	100	1199	gi|242057217|ref|XP_002457754.1|
aj_contig_579	TTTTTGAAGTAAAACTGATGGGATTGCACATTAATTTATCATGAGCAATACAATATCTGGTATCAACTGAACACGATCGATCGATCGATTGCTAGTTTGTTACAAGCGACTAGAAGAAGCTGGCCATGATTCGTAAGTGGTGCAAACGCTTTCTCATCAGCCAGCTCACGAATACACACATCTCGCCGCTTGCACCAAACAGCATGCAGCAGCAAGCAATGCACAATGCTCTAGTGGAACTTGAGGCTGGTAAGCACGTTGTTGTTGACAGGGTCGGCGAGGTGGTCGAGCAGGTTCTGGAACGGGCCGACGCCGGTGACGAGCCCCTGGATGAAGTACCCGAGGATGGCGAGCATGGCGAGCCTGCCGTTCTTGATCTCCTTGAGCTTGAGCTCGTTG…	gz_contig_1568	99.57	698	gi|195613254|gb|ACG28457.1|
aj_contig_580	CCCGGACGGGTCGTCGCCAACACGGAGGGTGATGCCTTGTACAGCCTGCGCCAAAGCTTGAGAGATGTTAACAATGTGTTGCAGAGCTGGGATCCAACTCTTGTCAATCCCTGTACATGGTTCCATGTCACCTGTAACAATGAGAACAGTGTGATCAGAGTTGACCTAGGAAATGCACAATTATCTGGTGTTCTAGTGCCCCAGCTTGGCCAGCTGAAGAATCTCCAATATTTGGAGCTTTACAGCAACAACATTAGTGGAACGATACCCCCTGAACTGGGCAACCTAACTAACCTGGTCAGTTTGGATCTGTATATGAACAACTTCTCTGGCAGTATCCCAGATAGCCTGGGAAGCCTATTGAAGCTGCGTTTCCTCCGTCTTAACAACAACAGCTTG…	gz_contig_6790	100	1196	gi|242065530|ref|XP_002454054.1|
aj_contig_581	ACAGGCCTTGTAAGATCCCAGTATCCCTCAAATTTTGAAAGCATCTGGCCTGCCACTTTGGCAACAACAGAAGATGGACTGTTACACCAGGTTCTCAAAAGAACATGAATCTCACACATCTCATTAAAATAAAGGTTTGCAGTTGGGTTTTCCACAGGAAACTTCTGCATAGTATTATAGACAACATCTAATATCTCGGTGAGGGCTTTAACATCAGCCCAATCATTAGCTGCCAGAAAAGCATCATAGTGTTCTTCATCTCCCAAGCGCACAAGCACATCATGATAGTAGCAAGCAGACTCAAACATGAAGAACATGGAAGGCCAGTTACCAGGGGAATCAACAACTAATGGCTTTTGATCCATATGCAGAAGCTTTGAGATGTCTTGAAACTTTTGG…	gz_contig_11634	99.71	1049	gi|242054117|ref|XP_002456204.1|
aj_contig_583	CACCAAAACAATCTTTCAGAAATTCACCTCAAATATACGAATTTCACCTTAACAAAAAAAACTGCATCCCACCCCATCTTCTGAGGTACGGAGGAAACCAAAAAAATTACCACTGTCACTAAAAAGGCCAATCCAACTTTCATATACACATGCAACAATCAGACCGGATCTGTCAATTAAGCTCTGCTTTTGTCGACTCGTATTCGAGGGGTGGTGCCTTTCAAGGAATCACCTTGGGTTAGACAGTTCCACTGCACTAAGGTTATACGTGGAATCAACGATCCAGTCATTGCGGAAAGGGGCCGACTCAGTTTCCTGCCTAACCACTTCCCCCTTCTGCCATTCATCCCATCTCTCCGCCAGGCCATCGCCTTCAAGCATTCTCACGACCTCCGACAT…	gz_contig_6797	100	2027	gi|242065530|ref|XP_002454054.1|
aj_contig_584	CAAGCCACACAAAACAAAGCCACGGACAGCCCATCAAAGACAAGCATGCCAAGAAGAGTCCATGGCTCTTATATTTGATCTGTTTACAGTTGCTGTCACCAGTAATAAGGAAAACTGGAAGTCAAACAGGAAGAAGATTTAAATATTGATTCACTATTTGTATCAAAGGTGATTCTACAGGCTGAATGCCTTTTATTCTGTCTGAATTCTCAATTCTCTATTGAACTCTCGGTGATTTTGAAATATGGTTCCTGTCTTGATTTCTTTCTCTTGAGCTAATTCCAGCAGTAGTATATCATTGAAAAATTGGAGTTCTGAATCTTGAACGCCAAATGTACTTACATCCAATGGGCTGTTACTGTACCATTCCTTTAGTTACCAGTTCCTGAAGGCCACGCT…	gz_contig_6730	100	1463	gi|195637964|gb|ACG38450.1|
aj_contig_585	GAGATCTCGACCATGAAGCTCATCAGGCACCCCAACGTCATCAAGATGCATGAGGTGATGGCCAGCAAGACAAAGATTTACATAGTGATGGAGCTTGTCGCTGGCGGTGAACTTTTCGACAAAATTGCTTCGCGTGGGAGGCTGAAAGAGGATGATGCGAGGAAGTATTTCCAGCAACTGATCAATGCTGTTGATTACTGCCACAGCAGAGGCGTGTACCACCGTGATCTGAAGCCTGAAAATCTTCTGCTTGATGCTACTGGAACTCTCAAGGTGTCGGATTTCGGATTGAGCGCACTTTCTCAGCAAGTCCGAGAGGATGGTCTTCTGCACACGACCTGTGGAACTCCCAATTATGTTGCCCCCGAGGTTATTAACAACAAAGGGTATGATGGAGCT…	gz_contig_1491	100	1331	gi|223949903|gb|ACN29035.1|
aj_contig_586	CCATCAATCAGTTTGGAGTTTCAGATGCAAGCATGCTGTGACAGATCAAAAAAGAAACATGGCAAGCTACTTTGCATTGCAACTAGTGAAGCAACCCTGCACATTCTTCATTCAAATTCACGACACTTTGGTTGACAAGTATCTCTAAGCTAGATGAAAGAGAAAAACAGTCCAAGCTTCTCGTTTCAGCAGCTCCTTGTCTGGCTACCGGCTACTTCTATCGCTTCGAAGCGAATCATGGCAAACTTCGGAGCTTCAACTCGTCACCTTCGACGATACTGCTCTCCGGCTTCCACATCACATCCTTCAAGCCATTTGAGATGTTGTGGTAGAACTTGTGGAATTCGAGGGTGTCGCCATTAGACTTGCGCAGCTCGACCATGTACAGCGAAGGTGTGA…	gz_contig_1479	99.77	1286	gi|242047430|ref|XP_002461461.1|
aj_contig_587	CCGGCGTGCCCTCTCCGACCTCCCGTGATCCCGTCTCACTGCCCCGGCCGCTTACAAGCGCGGATCTGATGGAGCCGACAGGGGATGGATTGAAGGTCGCCTACCAGGGTTGCCCAGGAGCCTACAGCGAGGCCGCTGCCAAGAAAGCCTACCCTAGTTGCCACACTGTGCCTTGTGAATACTTTGAAACCGCCTTCCAGGCTGTTGAAAAATGGGTAGCTGATCGTGCAGTGTTACCACTTGAAAACTCCTTGGGTGGTAGCATACATCGCAACTACGACCTTTTACTTCGACATAGGTTGCACATTGTTGGTGAGGTACGGCTTGCAGTTCGTNNNNNNNNNNNNNNNNNNNNNNNNNNNNNNNNNNNNNNNNNNNNNNNNNNNNNNNNNNNNNNNN…	gz_contig_5126	100	680	gi|115474283|ref|NP_001060740.1|
aj_contig_588	GAGTTCGACCGCCTCGACGACGACCAGCTGCTGTCCATGTTCGCCGACGACCTCGCGCCGCCAATTCCGCAAACAGCGCCCGCGCAGAGCTCGTCGTCGCCGTCCGACCACAACAGCTTTAACGACGAGAAGCCGGAGAAGGGCGAGAAGGAGGAGGCGCAGAGCAAGTGCAAAGGCGACGGCGCGGCCNNNNNNNNNNNNNNNNNNNNNNNNNNNNNNNNNNNNNNNNNNNNNNNNNNNNNNNNNNNNNNNNNNNNNNNNNNNNNNNNNNNNNNNNNNNNNNNNNNNNNNNNNNNNNNNNNNNNNNNNNNNNNNNNNNNNNNNNNNNNNNNNNNGCGGCCTCGGCGGCCCCAGCACCGGTTGATCCCAAGCGCGTCAAGAGGATCCTGGCCAACCGGC…	gz_contig_31112	100	341	gi|125569494|gb|EAZ11009.1|
aj_contig_589	GACGAGGAGGAGAGGGAGGTGTTTGCTCGAGAGGCAGTGGCACTCCGGAGGATGCTACAAGAAACTGTAGTGCAGGAAGCTTCCGTATCGTTGCAAGGAGAGGATACTGCCGAGACGCCGTTGCAATCGATGCTGGATGACTGCTCGAGGCTTGTGCTTGAACTTCGTTCGGTGGCACATTCTAGGGAGCAGCAGATTGAGAGCTTACATGCGAGAGTTGCTGAGGCAGAGGTGTCAAAAGAGGTTGCAGAAAGGTCTGAACAAGCAGCTGGCCGGATGCTTGCATCTATCGATGCTGTGGTTGGGCAAAATGATGTCAGCTTCGACGGTGCTGATCAGGATAGTGTGTCTATTCTTGAATGGAAGATGTCGTTGCTGGTGGAGAGGCACCGGCAAGTC…	gz_contig_4183	100	1868	gi|242062216|ref|XP_002452397.1|
aj_contig_590	GCTCACTGCAAGACTCTGTCAATTTCCTGTCTGTCCCTGATGGCATTCAGGAAGGGGTTGCTTCGAATAGTGACCAGGAGTGCCAATATAATGCTCATGTTGCTGATAAATCTGCACGGTGTTGTGATAGCTGTGGTAATCGCCTACCATCAAAGCTTTCAAAGAAAAAAAAGCAAGGGAGTGAGCAATTGCTCTGTAGGCACTGTGAAAAGCTATTGCAATCAAAGCAGTATTGTGGGATATGCAAGAAGATTTGGCACCACACAGATGGTGGAAATTGGGTTTGTTGTGATGAGTGCCAGATCTGGGTTCATGTTGAATGCGATAAGATGTGCCACAACATGGAGGACTTGGAAAATGCAGACTATTTCTGTCCTGACTGCAGATCAAGGCACAAAT…	gz_contig_7488	99.8	1472	gi|218187758|gb|EEC70185.1|
aj_contig_591	TCTTGGATACTCATCTTCGTTTCAACAACGAATGACTGCAGTCGATCTTTAGCAGAAAATAAACATCGTACAGACTGAAACAGCGGCAATATGTCGGATAAGATAGCATGCACCATTACACATCCTAACCCAACCCAGTACAAAATTTAGTCTCAGAGAATTGCAACACAAAGGATGATAAAAACACGACTGACAGAAACCTTGGGCTTATGGGATCGCTCTGAGACACTTTCACTACTGACTAAGCAGGAATGAAGCTCACTGCTCCTCATGGATGGGACCCTTGTCACTAACGTAGATACCGTCCAAGAACTTCCTGATATCCTTATTCTTCACATGGCATTTCTGGTTGATGAGGGCAGCGGAGCGAGAGACGAGCTCGATGTCGTTGCCGTCGAG…	gz_contig_7946	99.57	692	gi|242094384|ref|XP_002437682.1|
aj_contig_593	CGGCGAGGACGAGCAGGAGGAGGAGCTGGGAACCGAGTATCTGGTCCGGCCCCTTGGTCGATCTGAAGATGAAGAGCATTCCAGCGACTTTGAACCAGATGAAAACGGTGGTGGTGCTGAGGACGAAGAGATTGAAGACGACGATGCTGAAGATGAGGATTCTGGGAAGGCGCAGGCTTCAGCGAAGAGGAAGAGGTCAGGAGATGATGACGATGACAGTGGTGATGACAGCGATGACGGCGATGATGACGACGATGGGAGACCGTCAAAGCGATAGCTTGTTCTTGTTGGGTGGCCCAGTCTGATCTTCTGCAGGGTGTCGAGCATGGAAATAATCCTCTGGCAGAAGGTTGTTGGTAAATGGTTCTAGCTCTAGGACAAGTCGATAGTTGTAGCTGC…	gz_contig_3633	100	254	gi|125525730|gb|EAY73844.1|
aj_contig_594	CGCTGCGCCGCGACCTGGCACCTCATCACCCAGCTCCTCCGCTTCCCTCCGCCGCGCTTCTCCGTGGCCGCCCTCACGTCGCCGAACAGCAGGCGCTCCTCCACGTCGCACGTCTCCAGGATGCCCACGAGCAGCCGCTCCTCGCCGNNNNNNNNNNNNNNNNNNNNNNNNNNNNNNNNNNNNNNNNNNNNNNNNNNNNNNNNNNNNNNNNNNNNNNNNNNNNNNNNNNNNNNNNNNNNNNNNNNNNNNNNNNNNNNNNNNNNNNNNNNNNNNNNNNNNNNNNNNNNNNNNNNNNNNNNNNNNNNNNNNNNNNNNNNNNNNNNNNNNNNNNNNNNNNGGACACGCCGCGCTTGTCGTCGTCGGTGCCGATGATGCTTGGTGTGGGCTGCTGGTCGCCGT…	gz_contig_19706	100	359	gi|195625596|gb|ACG34628.1|
aj_contig_595	ACCGCCCCGAGGGAGCGCGCTCGCCCTCGCCCGAGCCCATCTACGACAACCTCGGCATCCGCATCAACACACGCGAGTACCGCGCCAGGGAGCGCCTCAACCGCGAGAGGCAGGAGATCATCTCGCAGCTCATCCGCCGCAACCCCGCCTTCAAGCCCCCAGCTGATTACCGCCCGCCCAAGCTCCAGAAGAAGCTCTACATCCCCATGAAGGAGTACCCTGGGTACAACTTCATCGGGCTCATCATCGGTCCACGTGGCAACACGCAGAAGCGGATGGAGAAGGAGACTGGTGCGAAGATCGTCATCCGGGGAAAGGGCAGTGTCAAGGAAGGGAAGCTGCTCCAGAAGAGGGACCTCAAGCCAGATCCCAGCGAGAATGAGGATCTTCACGTCCTTG…	gz_contig_5520	100	776	gi|414587608|tpg|DAA38179.1|
aj_contig_596	CGCCAATATCATTTTAAGAGTGGTCCCCAATAACTTCACCATATTTTCCTTACAAATCACAATAGAAACCAGAAGCAAGATGCTTCTGATTTATTATCACATTCTGTCAATTAAGGAACGAAAACATAGACATAGTAACTACAAAGTCTAGAATGCGAATGGCTGAACTCTGTAGGTGGCTGGCCTTCTTAACTATGTTTGCATACCACCACAGTAATTTACTAGAGTCCTAATTACAATAAAGATCAGAACATAATCCGCCAAGACAAGGGATTCTTCCATATAACTAAGGCAAGGGTTCCTCCGAATCACCCAGCCTTGATAGGTGGAGGTAAGCATCAGTTCCATAACCTTCCATAGAGATTATTTGCAAGTCCCCACCAAAGTATCGAGCATAAA…	gz_contig_4105	99.13	1028	gi|162459441|ref|NP_001104897.1|
aj_contig_597	AAGAGCTTCATCCTCAACCAGCTTCTCGGAAGGAGCAGCGGATTCAAAGTTGCGAGTACCCATCGGCCCTGCACTAAGGGCCTTTGGATGTGGAGTGCCCCAATAAAGAGAACAGCCCTTGATGGAACTGAGTATAGCCTTTTGCTACTTGATAGTGAGGGCATTGATGCATATGATCAGACGGGCACCTACAGCGTTCAAATATTCTCCTTGGCAGTCCTACTATCAAGCATGTTCATATATAACCAGATGGGTGGCATAGACGAAGCAGCCCTTGATCGCCTTTCACTTGTTACTGAAATGACCAAGCATATCCGTGTGAGGGCAAATGGTGGGAGAACTACTGCATCTGAGCTTGGGCAATTTTCTCCTATCTTCATCTGGCTACTGAGGGATTTT…	gz_contig_1470	100	2450	gi|413936050|gb|AFW70601.1|
aj_contig_598	GAAGTACAGAGTGACAAAGCAACGATTGAAATAACGAGTCGTTTCAAGGGAAAAGTGCATCAGGTTCTTTTTGCCCCTGGGGACATAGTGAAGGTTGGTGAAACTTTACTGAATATGATTGTGGGTGACAGCCAAGTTGTATCGCATGATAATATAGTTCCACAGCCTGAGAAACCACTTGGAGTGGATTCTACTCATTTTTCAAGCGAACCCAGCGGCCCAAGTGGAACCCTCTCAACACCTTCTGTTAGGCACCTAGCGAAGCAGTATGGGCTCAACATAAAGGAGATTCAAGGTACTGGAAAAGATGGTCGTGTTTTGAAAGAAGATGTGATAAATTATGCTGTCAGCAAGGGTCAGTTCGAAGAATCATCTATTTCAGAAGAGAGTATTGAGAAG…	gz_contig_12133	98.33	1253	gi|242057217|ref|XP_002457754.1|
aj_contig_599	TTTGACTCAACACCAGTTGGGAGAATCTTAACAAGGGCATCTTCAGATTTAAGCATCCTGGACTTTGACATACCTTATTCCATGGCATTTGTGGTTACTGGTAGTATTGAGGTTGTCACGACTGTACTGGTTATGGGAACCGTAACTTGGCAAGTCTTGGTTGTCGCGATCCCAGTTACAGTCACCATGGTATATGTTCAGAGGTACTACGTTTCCTCAGCCAGAGAACTAGTAAGAATCAATGGAACAACAAAGGCACCTGTCATGAACTATGCATCGGAGTCCATCCTTGGCGTAGTGACCATCAGGGCATTTTCAGCGACAGAGAGGTTCATCAATAACAATATGCAGCTCATCGACACCGATGCAACATTGTTCTTCCACACCGTTGCTGCACAG…	gz_contig_9952	96.69	1451	gi|242093342|ref|XP_002437161.1|
aj_contig_601	ATTGAAGTTTGCTGTATTATGCCTTTTTGGATGATATTCTTCATTTGCTCTTGAGTATCAACTCCATTTGTTGCCTTCACAATGTCAGGCTTGCTGAATTCGAACCTTAACAGCTCTGCATCAAATCTTCCAGACTCAACAGGAAGACCGTTTACGGCTTCCTTTTCAGGTCAATCCGGATCAATTCCAGGTTTCCATCATTCTGGCTTGCACACCATGCATGGAAATTACAGCATTGCAAACATGCCTGGGTCACTTGCTCAACGGAATGCTGCAATAAGCGGCCTTCCATCTTCTGGGGTTCAACAACCTGGAGGGAGCATGCCTGGGAGATTCAATACAAACAACCTTCCTGTTGCCATGTCTCAGATTCCTCATGCACATTCTGGTGTCAGTGGT…	gz_contig_8085	99.83	1781	gi|222625751|gb|EEE59883.1|
aj_contig_602	ACTGGCGGCGGCGGTGGCGGCCAACGGCTCGAGCAGCGACACGAAGGCCGCGTTCGCGGAGACATACAACAAGCTCAAGCAGGAGATGCTCGAGGACCCCGCCTTCGAGTTCACAGACGAGTCGCTTCAGTGGATCGACCGCATGGTGGATTACAATGTGCTCGGAGGAAAGTGCAACCGTGGGCTCTCTGTCATTGATAGCTACAAGATATTGAAGGGTGTAGATGTCCTGAGCAAGGAGGAAACATTTCTCGCGTGCACCCTTGGTTGGTGTATTGAATGGCTTCAAGCTTATTTTCTTGTGCTTGATGATATTATGGACAACTCTCAGACACGGCGTGGCCAGCCTTGCTGGTACAAAGTGCCTCAGGTTGGTCTCATTGCTGTAAATGATGGGAT…	gz_contig_4256	100	998	gi|242054143|ref|XP_002456217.1|
aj_contig_603	GCAGTGGTACTTCCACAAGTCAGACAGGCATCTTACTGTGGATATTTAAAAGGGAGAAAGAGGATGAATATTCAAATTTGCGAAATGTCTTGATTTATTTTGGAGGCTGATGATTTATCTCCATGAGAGATTGAGCAGCTTCTGCCATTTCCCAACCCATGTCGCATATCTCTGTTCCTAGTTTTTCTTGCATGCCCATCCTTTTGAGCTGAGGAGTACTCTGAATCAGGTTGCTGAGCTTTAATTGAAACTCTGCTGCTCCAGATGGATGTGGACACCAGNNNNNNNNNNNNNNNNNNNNNNNNNNNNNNNNNNNNNNNNNNNNNNNNNNNNNNNNNNNNNNNNNNNNNNNNNNNNNNNNNNNNNNNNNNNNNNNNNNNNNNNNNNNNNNNNNNNNNN…	gz_contig_3162	100	1667	gi|242082097|ref|XP_002445817.1|
aj_contig_604	GTACTCGCCTCTCTCCGCGCCTCCAATCTTTCTTCCTCCTCCTCCCCATTTCCCCTAGCCGCCGCCGTAGCCTCACCCGAGCGACACCATGAGGGAGTGCATCTCGATCCACATCGGCCAGGCCGGTATCCAGGTCGGAAACGCGTGCTGGGAGCTGTACTGCCTCGAGCATGGCATTCAGCCTGACGGTCAGATGCCCGGTGACAAGACCATTGGAGGAGGTGATGATGCTTTCAACACCTTCTTCAGTGAGACTGGCGCTGGCAAGCATGTGCCCCGTGCCGTGTTTGTTGACCTTGAGCCCACTGTGATCGATGAGGTAAGGACTGGCACCTACCGCCAGCTTTTCCACCCTGAGCAGCTCATCAGTGGCAAGGAGGATGCGGCCAACAACTTTGC…	gz_contig_149	100	1235	gi|8928432|sp|Q9ZRR5.1|TBA3_HORVU
aj_contig_605	CCCCTTGTCCCAAGACTCCGAACTGCCCCCGTTGGGACTGGGACCCCGTGCCGTCACCTCGCTTCCTCGATCGATCGCTTGGGTTCCCTTCTCTCCTCTCCAACTCTTGCGGCGAGTCTCTCTGTCTCTCCTCCACCCGCAGCCATGGAGCAGCAGCACGACGCGGCGGCAAGGCGGATGGCAGCGCTTGCTTCCCACCTGCGACCGCACCCCGACACATCTCAGATGCAGGAGGTTTCCCTTCTCAGGGGATCTAATTGCCGTGCCAAAGGTGCAGCGCCAGGATTCAAGGTTGCAATCCTTGGTGCATCCGGTGGAATCGGGCAGCCCCTTGCGCTGCTAATGAAAATGAACCCTCTTGTTTCGGTGCTCCATCTCTACGATGTTGTCAACACGCCT…	gz_contig_10881	100	1403	gi|242086440|ref|XP_002443645.1|
aj_contig_607	TTTGCCTTTTCAGCATCTGAAAGCTCCTCAATTGCCGCCAGAACAGCAATACAATTCTTGATGGAATAGTCATCATTTGGCTTTGTTTTTTTATCCTGCTCATCCACAAACATTTTTGTTTGCTGCTTCGTGAAATCCACATAATCTTGCAAAACTCCAGCAAGTTGACTTTGATTTTTTCTTTTCCCACTGCCAGATCCTTTTTTATCAGAACAAGAGGAAGTTGTGCGCTCTTCTTCATCAAGGTTAATGGGATCATTTGATGGTCTTTGCCCCTCAAGGTTTGTAGAGAAAGGATTCACACTAACACCAATATCATCTAGATTCAAGAGGGTGCAAAAATACTAGGTTCTTGGGTTGATGTGAAATTTAATTCTCCTGTGGCTATACTTCCTTCAT…	gz_contig_7781	99.07	647	gi|414586525|tpg|DAA37096.1|
aj_contig_608	TGTTCTCTTTCTTCTTTGTTGGGCAGCCAAACGGCCACGCAAGTGCGGACCCCTTATCTGCAGGGACCAGGGGAGGACGCACGCCAACGCCGCCGCCCTCCGGTTCTTCACTCGCTCTCTCCTAGGAGGTTTAAGGGGCACAGCTTCTGACCATGGCTGGGACCTTACTCCAGTCAGTTGCGCTAGGAACATCATTCGGAGGTCATGGATGCGCCCAGCGCAGGAGGTCGCATGGCACCAGGAGGCCACCCTCAATGTTGGCGATGTCAGTTAGCCGCCCTGTAAAGATGTCGGCATTCGTCGGTCTAAGATCTGTACATAGCTTCTCGGTCGCACCCATGTCAACTTCTAGATCGACAGTTGCATCCTACAAGTCCTCTCGGCGGACGAGGCGTTCCC…	gz_contig_2640	99.76	2498	gi|218186618|gb|EEC69045.1|
aj_contig_609	AGGCCGGGCGCTGTGCCGGATCCGGGGCCCAACATTGCTCCATTAGTCGCCTCCACTCCGGATCACATGATGCTGGTACTGGAGGCCTCAGTGTATTGTTCACAATGCCCCCTATAATTGCACCATAATGCATATTGGCATAAGGTTCTTCACCGGTGAGGATTTCCCACATAACAATACCAAAGGAAAATACATCAACCTTCTCAGACACTTTATTGCTGCTTCCATTGAGTAATTCTGGTGCCATCCATGGTAGTGTTCCCCTTACACCACCTGAAACCAGGGTATTCCTTTTTATTTTGGATAAGCCAAAATCACCAACTTTACAGATCGGACGCGATTGATCTTTCAGATTTACAAGCAAATTATCACACTTCAAATCAAAGTGCACTATGTTTT…	gz_contig_2902	100	3095	gi|242086935|ref|XP_002439300.1|
aj_contig_611	CGTCCGCACCAAGAAACCCAGGGGTTGCTTGGACCCTGAGAACTTCAGGGAATTCGAACTGGTCGAGAAGAGGCAATTGAGTCACAATGTTGCAAAGTTCAAATTTGCGCTTCCAACGCCTACTTCCACATTGGGTCTTCCAATCGGCCAACACATAAGCTGCAGAGGGAAGGATGCTGCTGGCGAGGAAGTAATCAAGCCTTATACACCGACCACACTGGACTCTGATGTTGGACGCTTTGAGCTTGTCATAAAGATGTATCCTCAAGGAAGAATGTCTCATCATTTCCGCGAGATGAAAGTTGGTGACTATTTATCTGTGAAAGGACCCAAGGGCCGTTTCAAGTACCAACCTGGACAAGTTAGAGCATTTGGAATGTTAGCTGGTGGATCTGGCAT…	gz_contig_9313	99.62	797	gi|242088301|ref|XP_002439983.1|
aj_contig_613	ATTCCATCAGTCTTATTCCATAAATTTCAATTCCTCTTCCTACCCCAATCACTCAACAGTTCATTATAATTACATAGCCATTGAGGAAGCCAGTTTCATGATAATTTACAAAGTAATACTCCCTAGTACAGCATCAGAGAAAAGGATGATCCACAACAGCATGAAACTACAAATAAACACCAAGGGCGCAGCATCTCAACACCACAACTAAAACACTGACGGCATCTCATCAGCTGAAAACTTTTAAACTCGCCGGCTGTTTCATTTTATTAGATATTGAAAATCACCACTGGCATGTACTGCCTTCACCTGCTTGTCATATTCGTCTTCGTCATCGTATTCCTCACCCTCTCCATCATGTTCCTCGTCGTCAGGTTTCTTGCCATCTTCTTGCTCTTC…	gz_contig_2588	100	722	gi|242065356|ref|XP_002453967.1|
aj_contig_614	CCGCAGCGCTTCTCCTCACAGCAGCCAGTGGTGGAGGCCTTGTGGCGTATGCTGAATCTGCTGCAGAAAATGCTCCGGAATCATCCCAGAGTCCTCCCAAGAAGAAGGTGCTGGTTCTTGGAACGGGCTGGGCTGCTACCTCGTTCATGAGAAATCTTGACTGCTCCCGCTATGAAGTGAAAGTCGTATCGCCTCGCAACTATTTCGCGTTTACACCTCTGCTTCCCAGTGTCACATGTGGGACTGTGGAACCCCGCAGCATTGTTGAACCGATAAGGAGGATGTTTGAGAAGAAAAATAAGGATGTTACATTTTATGAAGCTGAGTGTTTCAAGATTGATGCAAGCAAACAGATTATCCATTGCCGTTCAGCTGTCGGTACCAACCTTGATGGGAATG…	gz_contig_1627	100	1640	gi|242096782|ref|XP_002438881.1|
aj_contig_615	CCGCCAGGCTGGATCCTTGCGTGTTCATGGTGTTGCAATGCCGACAATGGAAGGAATTTCTAAAGTGCTAAATCATATTGGAGCACGAAAAAAAGGAAAACAAACAAGGGTCCTATGGCATAGTCTTCGGGAGGAACCGGTTATCTATGTCAATGGCCGCCCCTTCGTTTTGCGAGATGTTGAAAAGCCCTTCTCAAACCTTGAATACACGGGAATTAACCGGGAGAGAGNNNNNNNNNNNNNNNNNNNNNNNNNNNNNNNNNNNNNNNNNNNNNNNNNNNNNNNNNNNNNNNNNNNNNNNNNNNNNNNNNNNNNNNNNNNNNNNNNNNNNNNNNNNNNNNNNNNNNNNNNNNNNNNNNNNNAACCGGGAGAGAGTAGAGCAGATGGAGTTTCGCCTAA…	gz_contig_4002	99.91	3491	gi|242033767|ref|XP_002464278.1|
aj_contig_616	CCACATAGAAACCATTTTATTCCTCGACACAAACAAATACAATAAAGTGAAGGCCAAGGGCAGACATCTTACAGCTTATTAGGCAAGCAACTCAGGATTACAACACAATTTTATTGATACAATATATGATAAAACTCTGATGGCTGTATCATATTATTTAGTTTCTTACCTGCTGTCTGCAGCAGTTTATTTATTTCAGGCCTATTGTTCCACAATAGGCTTTACTCGTTCATATATGTACTCTCTTAAGTGTTTCTTGGCCCTTGCAGTAGACAGCTAAATTGGGATATCTAAACTGGTAGGTCTGTGTTCTTGTTAAACGGGAATGGCTTCAGTCTTGGCTCTGCAGCTTCTAAGATTTGTTCAATAGGCATCTCTGGTTTTGACCTTTGCAGAGGT…	gz_contig_912	98.17	1805	gi|297725759|ref|NP_001175243.1|
aj_contig_617	CGGCGACAGTCAGGATGTCTCTCGATGTTACTCAAGTTCTCTTAAGCGCACAATCTGCTGATGGTGCGATTAGGAAGCATGCTGAAGAAAGTATCAAGCAGTTCCAGGAGCAAAACCTTCCAGGGTTCTTACTCTCACTCTCTAGTGAGTTGGCCAATGAAGAGAAACCTGAGGAGAGCCGTAGGTTAGCTGGTTTGATCCTGAAGAATGCACTTGATGCAAAGGAGCAGCACAGGAAGAATGAACTTTTCCAGAGATGGCTTGCACTGGATGCTGGTGCCAAGGCTCAGATTAAAGGATTGTTACTGCAAACTCTCTCATCTCCAGTTGCAAATGCCAGATCTACTGCCTCTCAAGTTATTGCGAAGGTTGCTGGTATCGAGATTCCTCAGAAACAAT…	gz_contig_1800	99.62	2384	gi|242083844|ref|XP_002442347.1|
aj_contig_619	CAGGAATGATAAATATACAGAATAGCAAAAGAGAAAAATCTTGGTATTTGTCATTGTCTAGAAATAATACGGCCCCTGATGAATGGTTCGATATCACCTTCAAGGACTGAGTTCAAATCTGATAACTGGGTACCTGTATTGAGATCATGAACACATTTCTGAGGTCCAAATCTATATCTTCTTGTTTCGTGGTTCCACTTGTCATCTACAGTTTGTTTGTTGATCATCTTCGCATCTGATATTCTCAATTCTCGCGCTATCAAGAGGAGCTTTGCTTTCAACCTACTCATAGCTTTTAGCTTGTTTGCAAAGTAGCTCCTCTCACCTGAACTTTCAGCAGTAACTCCACTTGGTTTGTGTCGGACCAAAACAGCAGCACCATTTTTGCTATCTCGCTTC…	gz_contig_6051	98.12	479	gi|242087755|ref|XP_002439710.1|
aj_contig_620	CCACTTGTTTCTCAAGCTAAGTTTCTCAAGCTAAGTTATTCTCAAGTTATATCTGAACCACTTGTGGCATCTAAATATAGTACATGTCACACAAAGAAAACCAAAAATAGTTTGCTTCCAGATTCAGCAATCACAAGCTCATTTCTAAATTGTACTATGTCATGCTCCATAATCATGGAAGCATANNNNNNNNNNNNNNNNNNNNNNNNNNNNNNNNNNNNNNNNNNNNNNNNNNNNNNNNNNNNNNNNNNNNNNNNNNNNNNNNNNNNNNNNNNNNNNNNNNNNNNNNNNNNNNNNNNNNNNNNNNNNNNNNNNNNNNNNNNNNNNNNNNNNNNNNNNNNNNNNNCAACACTCCAGTCCAATGTCACCCAAATGTAAACCAAGCACAACTTGAATAAT…	gz_contig_966	100	2333	gi|111226957|ref|XP_001134615.1|
aj_contig_621	AGCAAACAAAAATAAACTGCATAATTCAATTGAGCATTCCTCCACAAGTTCTATTAAAGAAGCACTAGATAAAGGACCAAATACTTGTTTGGTATTCCCTGGACAATCACAAAACTGATATTGGTTCAACAGATCTAGGTTTTAAGATAAGCTCGGTGAAAAGCGCAACTTAGAACAACCTGTACGGTTTCCCCATGGTGCTCTTGATGTACAGGCACCTCACATTCTGCCAGTTCTTTTTCAGAAGGGACACAAGAAAGTTGACGCTCATTTGGATGTTCTGCTGGATCTGTTTCTCCTCCATCGCTAAGTTGCCAACAGCGACACCCATGCAGAGAACCTTCTTCAGCTGGAACTTGATTGTGGCCTTTGTCTCGTTGACCTTGGATTCAAGAGATT…	gz_contig_1258	99.17	359	gi|42407951|dbj|BAD09090.1|
aj_contig_622	GCTCCCCACCCGCCGCACGAACTCCACCCTACCTTCCAATCCTGGCTCAACCCCATTCCATTCTCTGTTCCGTTGAGACCACGGGAGGCAGGAGGCAGCCCACCCAGCCGTTTCCTCCCCGTTCCGTCCCCCGCCTCGCCTCCTCCGCTCTACCGATTTCCGCCTCCTCCGCCGAGACCCGCGCCTCCTCGCCGCCGGCCGCCGNNNNNNNNNNNNNNNNNNNNNNNNNNNNNNNNNNNNNNNNNNNNNNNNNNNNNNNNNNNNNNNNNNNNNNNNNNNNNNNNNNNNNNNNNNNNNNNNNNNNNNNNNNNNNNNNNNNNNNNNNNNNNNNNNNNNNNNNNNNNNNNNNNNNNNNNNNNNNNNNNCCCGCCGGCCGCCGTGTGCTAGGTTTTCCGACCA…	gz_contig_4284	100	2012	gi|242073334|ref|XP_002446603.1|
aj_contig_626	GAAGATGGTTTTTGAGGCCCCGCCGCAGCCGATGAGGGAGGACTACGTCGAGAACGCCGTCAAGTTCCTCTCGCACCCCAAGGTCAGGGGCTCCCCTGTCGTCTACCGGCGATCCTTCCTCGAGAAGAAGGGCCTCACTGCCCAAGAGATCGACGAGGCCTTCCGGCGAGTCCCTGATCCGCAACCGAGTGCCGCTGCTACAGCTACTACCTCACAGCTGCAGGCTAACAACCAGAATCCATCCACTGGACCACAAACTTACGCACCAGTGCAGCCGGCAACCGGCCCTGTTGTTCTTCGGGCGCAGCCCAAGTTCAGCTGGTACCAAGCCTTCCTTGCTGCAGGGCTGTTGCTCGGTTTTGGGGCTAGTGCTGCTGTATTCATCAAGAAACTGTTCCT…	gz_contig_2826	100	1142	gi|413950303|gb|AFW82952.1|
aj_contig_627	ACATACACAAGATAAATAATTCATTCACAGCATGAAAAAAAACCAATGGATATCATATAACATAAACTTGATCATATAGTTGTGCTTTACATGACCAATTGGTTCTATGGACAGCGGTTTATTACTCATTATAGTCCACTGTCTCTATAAGAGAGTCATGCTCTAAAGAAAATAATTTATGCATGCATGCAGTTGTAGCTAGTAAAAAGTTAAGCATGTGATGAATATTGCATCGATGCCATGAATATGGAATGACAGAACATATGCATGCACTTAGCATCAATAATAGAAATTATGCTCCAAACTGTAATTTTGTAGGGTAGTCAGTCCCAGCCTTCCAATTCTCAGGGATGACATCATCTTGGACACGACTTCCCCCTCCCTCGGCTCTGAGGCGGA…	gz_contig_27701	97.46	353	gi|32344781|gb|AAP80171.1|
aj_contig_628	GTAATTTTTATACATCAGGATAAGGAATGGAAATAGCGTACATGCAAATGTTCAATGTCATCGTTTCTTCCTGAGCATCAGAGCTCTGACGATACTCCGACAAGGATTTACAATGTTCCGTTTTATTACAGGTTAACACGAGGGCACAAGCTTCAGCTAAATAAGTCAACTGTTTGGCGTACTAACTCCAAACAGACCCCTTGGTGCTGTAGATTAGCGGTAAAGCTTGCTGAGCTCATCCTTATATCTGGTCTTAATTTGCTCCCTCTTCAGTTTAAGTGCAGCCGTCACCAGACCAGATTCTGGAGTCCATGGCTCGGGAAGCAACAAGATCTTCGCTGGTACCTCAAATTTCTCAAGCTTTGCAGCTTTTCCAGCCTTCGATAGAGATTGCTGGAC…	gz_contig_3145	98.16	2444	gi|115463155|ref|NP_001055177.1|
aj_contig_630	TGACGTGAGATAGATGGAACACATGCGTGGAAAATGTTACAACAGTCCACAGCTAATTTTGCATTTACAGCTACATGGCTAGCAACTGGAAGGAAAGTATTGAGCTACTTATAGTCACTTTGGTATTCTTGGACTATATTCAGGTTTTAGAACACATCTGGAGAGGGCCGAGTTAACCTCTCGTCCTCCAGAAGCTCGTATGGATCAATGTACGGCGGTGGAGAAATCGGCGTCTTGCTTGCATCATGCACAAAGCTCGGTCCAAAGTACAGATATAAACCAGCGAAGACAGAAACTGTGACAAGAATGAGAGGCCCAAATGCCAGGAAAAAGGTACCACCAAGTGATAACAGTAACTTTGCTCGTGGAACAAGACCCTCGAGACCCTCGCTGTTGAGC…	gz_contig_13082	100	410	gi|242071319|ref|XP_002450936.1|
aj_contig_632	CCTGGAGGCGCGGGGGAGGGAGATGATTGGCGACACGTACAAGGATCCCATCACTAGCTTCTCGGACCTCCACAAGTTCTCCAACGAAAACCCAGAGGCGTACTGGAAGATGGTCTTCGAGGAGATGGGTGTTGAGTTCAGTGTGAAGCCATCCTGCATCCTTAGAGAGAGCGATGCGTACCCTGGTGGTGAGTGGCTACCAGGAGCTGTGCTGAATGCCGCCGCGAATTGTCTGACTGCTAAACCTGGGAGGACTTCCGATGATGTCGCTATCGTGTGGAGAGAGGAGGGGAAGGATTCTGATCCTCTAAACTACGTGACTCTTGAGGAACTGAGGGAAAAAGTCAGCCTTGTGGCAAATGCACTTGATGCCCTGGACCTGCCAAAGGGATCTGCTAT…	gz_contig_4474	99.47	1700	gi|326508732|dbj|BAJ95888.1|
aj_contig_633	CTGATTCTTGATGGTCTCTTAGTCCGTCCAGTCAAAGGTGCTGTGGAGACCGCTGACATTTGGATTTGATTGCTCAGAAATGAAGCAGCACGTGTATGAGATCTACGTGTCTCCTAAGAAAAACCAGAGTCCTGTGGCTGTCCTTCATCTTCAGTGATAGGAGATGGGGAAAGGGGGTTGGGCGAGTCAATGGCGTCGCTGGTAGAAGGGAGGGATTGGTGGGTGGCGGCTGCAGTGGGGAGGGCGACCGGATGATTTGGGCGGGTGACCGGAGGAGTTGGAGTGGAGGCCGGCAGCTGCCA	gz_contig_7857	100	296	gi|403716451|ref|ZP_10942000.1|
aj_contig_634	GGCAACAGCGCCGCGCAAGGGCTGCTGTCCTTCCTCGGGGCACCCGGATCTGGGGTTTGAGGCGTCGGACGGCAAGATCTGGTAGGGTTCTTGGGCTCGAGAAGTTCTTCTTCAGCTGGAATTTATGCGGATCTACTCTTGTAGCTGTAGCATATTACTTCATCATTGGCTTCTCCATGTGTACCCACAGATCTACTGGCTTAGCGTTGGTTCCGCGTGATGCACCAACTTTTGCTAAGATCAGCAGAATTATTTCTCAAATTTGTGTGATTGGTTTAGGGCTAATTAGTACTGCTCAATATGAACTTACGAGTTCAAATTATCAACATAGACATGTGTTCCTTGGATCAGTGAGTCATTTGTATGCTTAATTTACCCAAGCATTTCATTGTGATATAT…	gz_contig_24049	100	392	gi|238007112|gb|ACR34591.1|
aj_contig_635	GCACCCGGATCTGGGGTTTGAGGTTTTGGACGGCAAGATCTGGTAGGGTTCTTTGGCGCGAAAGTTCCTCTTCAGCTGGAAATTATGTGGATCTAGTCTTGTAGATGTAGCTTATTACGGAGTACTTCATTTGCATCTCCATGTGTACCTTCAGATCTACTAGCTTGGCGTTGGTTTGCGTGATGCGCCGTCTTTTGCTAAGATCAGCAGAATTATTTCTCAGATTTTCGCTGTGGTTGGGTTTAGTGCTAATTAGTAGTACTCAATATGAATTATCAATATAGATGTATGTTCCTTGGATCACTGAGACATGCATGCTTAACTTGTCCTAGCATTTCGTTGTGAT	gz_contig_25523	96.49	341	#N/A
aj_contig_636	AATGATCTGTGAGGTTTCTGCATGAACTGATAAACAAAAACCTACCAACATCTAGTCAGCCTGTGGACAGCACCTCTAGCAAACCTACAGTGCTGTGGCCACTGTTGACAGGTCAAACTAGCAAGAGTATGGACCTGCATGAGAGGTAGAAATGTTAATGCCAGTACAAAACCAACAGCTACTGCGAAGCCTACAATAGTATGGGCAGGAAAGCCATCTCTTTCCCTCTTTTAACTTCATTTAAGTTACAAAAACTGAATATCATACAAGGAGCAAGAAAACATGCACCAAAGCTACTACCCACTAACAACGCTACCTGCTTCCTATGTCTTTCCAAGGATCCACATCACAGCTTGTAATCTTGGAACCAGGACCATACTGTGCCTTGAGAGCAGCCAC…	gz_contig_1504	99.72	3227	gi|242089363|ref|XP_002440514.1|
aj_contig_637	TATTGATAACCACGAGGATCATAAATCCATCGACATTATTCAGTAGTTCAATATAAATCTCACAACTCTCCATCAAAATTATGATAGGAACCATAAGCGGAGTACAACGGGTAAAAATGAAACAGCAGGAATTATAGTTCAGAAGGTAAAATTGCTAAGAAAAATGACGGCGAAATATGTAAATTGATCCTCTGTTTTGACAGGCTAATAAGCAAATGATGGTTCACTGGGCCGGAAGCTTCTGTAGATGGAGGCTGCGACTGGCACGAGACCCAAAAGTGCAATCTGAACCTGCTCTGAGGTGCTTGTCCGGACAGTAATCTGTCCACTCAGCTTGTTATTCAGGCCAAGACGAATTGCCATCTTTGACCCCCTTCCAATTGAGAATTGGGACTGCAA…	gz_contig_5317	100	1598	gi|413915804|gb|AFW21568.1|
aj_contig_638	CCCGGCGGGTGCGCGAGACATTCATCAGCTTCTTCGAGTCCAAGTCGCACACGCGGTGGCCGTCGAGTCCCGTTGTCCCCGTCGACGACCCCACGCTGCTATTCGCCAACGCTGGAATGAACCAATTCAAGCCCGTCTTCCTCGGCACGGCAGCGCCAGAGTCGTCGCTCGGTCAGCTGCGCCGCGCCTGCAACACGCAGAAGTGCATCCGCGCTGGCGGGAAGCACAACGATCTGGACGACGTGGGGAAAGATACGTACCACCACACCTTCTTCGAGATGCTCGGGAACTGGTCCTTCGGGGACTACTTCAAGGAGGAGGCTATCGGCTGGGCTTGGGATCTCTTGACCACGGTGTACAAATTGCCTACTGATAGAATTTATGCCACATACTTCGGTG…	gz_contig_785	100	3206	gi|242085328|ref|XP_002443089.1|
aj_contig_639	TTGCTGGCCTTTATGTCCCTGTGCACAACACGGATGCTGGACTCTTCATGGAGATAAGCCAGGCCTCTCGCAATGCCCAAGCTTATTTCAAAGCGAGTTGGCCAGTCTAGGTTCAGTCTCCCACTTCCGAACAGTGCTTTATCAAGGCTTCCATTCACCAGATACTCGTAAACCAGAAGTGGATTACTCTCNNNNNNNNNNNNNNNNNNNNNNNNNNNNNNNNNNNNNNNNNNNNNNNNNNNNNNNNNNNNNNNNNNNNNNNNNNNNNNNNNNNNNNNNNNNNNNNNNNNNNNNNNNNNNNNNNNNNNNNNNNNNNNNNNNNNNNNNNNNNNNNNNNNNNNNNNNNNNNNNNNNNNCTCTTACTGCCCTCAAGGCAGCAGCCATACAACTTCACAAGAT…	gz_contig_6288	99.61	776	gi|38345599|emb|CAD41882.2|
aj_contig_642	CCAACACAGCACAAACCACAGATACACTTCAGCAGCAAAGAGAGAGCAAGGAGCAGAGCAAGAGAGCAGCAAGCAATGGCGACGCGTCGCGTCTCATCGTGCTGCGTCCTTCTGGCCGTGTTCCTAGGGGTAGTGGCCACCGCTGCCGCCTTCGACGAAGCTATTGTAGCAGGCGTCGGTCTTGGTCATGGCGCGCGTTTCGCTCGCAAGCCAAGGCGTTCTGCCGCCGAGAAGCCCCAGCCAGAGCCTCAACCCTTGCCCAA	gz_contig_5908	94.59	221	gi|242085322|ref|XP_002443086.1|
aj_contig_643	AAAAAATACTCCTGCTGCAATTGATGCCTACAGGAGAGCTGTTGATATTAATCCTAGAGATTACCGTGCCTGGTATGGTCTTGGTCAGATCTATGAGATGATGGGGATGCCATTTTATGCACTTTATTACTTCCAGAAATCATCTTACTTGCAACCTAATGATGCTCGTCTCTGGATTGCAATGGCTCAGTGCTATGAAAGTGATCCACTTCAAATGATTGAAGAAGCCATCAAGTGCTATGAGAGGGCTGCAAGAAGTAATGACACCGAAGGAATAGCACTTCACCAACTAGCAAAGTTACATGGCATGCTGGGGCAATCTGAAGAAGCTGCATATTACTACAAGAAGGATTTAGAGAGAATGCAAGTTGAAGAAAGGCAAGGCCAGAATTTCGTTGA…	gz_contig_15647	99.39	494	gi|413938080|gb|AFW72631.1|
aj_contig_644	GGATGGTCTCTTGCCCCTTCCTGCTGTACCTGGTCCCGTCCCAGGAGAAGGCCACACAAGTGCGATCAATATGCAAGCCCTTGAAGTCTCTTGGCATTCATTCGGTGAGCTTGCATCCTGGAGCTTCTATTGAACACCAGGTGTCAGGACTAAAAAGTTGCGAGCCGGAGTTTCTTATATCAACCCCAGAGAGGCTTCTTGAACTAGTTTCGTTAAAAGCGATTGACATATCAAACGTAACAATGCTGGTTGTCGATGGACTGAAATCTTTCAAGGACCTTAATATTGTTGACAAGATTTATTCTAATAGAAATGCCATATCGAACAAGCCTCAAATCACTGTGTTCAGCGATCCATATGACAAAAATGTTGCTACAATAGCAAGAAATCTAGTCCATG…	gz_contig_15218	100	824	gi|242082802|ref|XP_002441826.1|
aj_contig_645	CCCCGCTCCACGTCTTCCCGCACCGAAAGGGAGCTCCTGCTCGAGCTCGGCCTTCTGTTGTGCAACCGTTCGAGGAATTGGCCGGCTTTCTTCTCCCAACCGCCGTCCTTGTTGTCCTTGCTTCTGAACAAGCTAGCAGGGCCGTGTGAGGCAGAGAGAAGGAATAAGCTGGCTTGAAAAAAATGGCATCTCTTACTCCAGGGATATTATTGAAGGTTCTAAAAAATATTAACTCCGATGTGAAAGTATGTGGAGAATATCGATCAATTCTTCTCCAAGTTATTAGCATAGTCCCTGCAATTACAGGCTCGGAGCTTTGGCCAGACCATGGTTTCTTTATCAAAGTTTCTGATTCATCACACTCGACATATGTTTCTTTGTCAAAGGAGGACAACGAAC…	gz_contig_189	97.6	1373	gi|242042001|ref|XP_002468395.1|
aj_contig_646	CCAATAAAAAGGTGCACATACAAAATCTCATGAAATTTATACCATTTAGCACAAACATTAAAAGCCCAAGTATTTTGTGTTCCAATCAAAACCAAACGGTGATTATTTATAACAGACACCACACCATTCAGATAGCAGCTGGCAAAGGTGGCTCAGAAGAACGACTCTAGGCCTTTCTGCACACACCACCCTCACACACATATCCTGCAGGAACTTCCTCAGTAGCCTTGTCCTTTTCATCCTTCTTCTCCGCCAATGCACACTTCGGATGAAGGTCGAATTCGCACTCCTCGCATTTGTAGCTCCAGCGGCTGCCCAGATCTTCGCATCCATCACAGCTGTACACATCACTGCGTGTCAGGACAAGCTCATGCTCATCATGCAGCTCATGCTTTAACT…	gz_contig_5384	98.87	1865	gi|242040629|ref|XP_002467709.1|
aj_contig_647	AGAGCTTGAGGTGAGAAGAAAAGGTTGGACAGGACAAACCTTCTTTCCCTAAAATAAGATAGGAATTTCTAGCTAAAAAGAAAACAAAGGTTACGGTGGAAAAATGACATACAACATCACAGGCAATTGCCGCCACTTTACATACATGAACATATACCCTAGGGCACTTAGATACTTGTGGTTGCGTCCCAAAGCCGCAGGAGCCCATTTCGACCACCACTGCAGATTCTTTTCCTATCCAGGTCTGATGCTATACATCTCACCACTGCAGCAGTCTTCTGTGGAGTTCTGTAAAGCTGCCATCCAGCAACTTTTGATCCTGCATTTGAGAAACCACCAAATCTCTCTTGCGGACGATGAAAAAGGGACATAGAATTGTCAGCAGCACCAATTCCTAGC…	gz_contig_16565	100	1487	gi|326492233|dbj|BAK01900.1|
aj_contig_648	CTAACCAGGGCTCACTGTTCCAAGCTGTTTACAAAAATAAGTGAACGAACTTTTTGACTAACGATTCTAACAACCGCTTGTAAAATTCCTTCTCTTACATCTACATCTGGCTGGAGAGTGTCTATAAGTTGAAAGAACTTCACTCTTCAAGAAGTCTGAGAATATACCAACTGTTCACTAAACGTCTGTCAGAATTATGGATGATACAATCATGACGTAGGCGAGGAAGAAGAACATGACAATCTGGATGAAGAACTTCGGGTTGTCCCTCAAACTTGGGGCCACCATTGATCTACTGGCAATCCGCTGTGAAAGTCTATTGAAGGGTAGACTCTGAATGAAAACAACACCTGGTCCTGTCAGAGATGCTGTAAGCTGGTTGTCACCCCCAAAGACTGC…	gz_contig_9216	100	1049	gi|115455313|ref|NP_001051257.1|
aj_contig_649	CCGACACATTGCAAAGTTACAATCTGGGGGAACTGCTCAGTTTCAGGAATGAATGACCATTCTGATTAGGAGGAACTACATTTACACACAAGGACTGACGAACGTAGATAACAGCCAACACCATAAAAGAGTTCCAAGTAAAAAAGGAACAGAAAAAAATAAGCATACACACACAACTTGTGNNNNNNNNNNNNNNNNNNNNNNNNNNNNNNNNNNNNNNNNNNNNNNNNNNNNNNNNNNNNNNNNNNNNNNNNNNNNNNNNNNNNNNNNNNNNNNNNNNNNNNNNNNNNNNNNNNNNNNNNNNNNNNNNNNNNNNNNNNNNNNNNNNNNNNNNNNNNNNNNNNNNNAACACCTCGTCAATGAAAAAAAAAGAAATTAAAGATCAAAATAATGCTAATA…	gz_contig_2023	100	965	gi|242040073|ref|XP_002467431.1|
aj_contig_650	GCCTCGGCCATGGATTCGCTTGGTTCGAGGCGCTCTGCTCGTGCCGCCTCTTCCTCTTCGTCGTCCTTGCCGTCGCCGGCTCCGCACAGAGCCTGCTAGCCTTCGCCTCATCTGGCTCCGGCTCCGGCTCCGGCTCCGGGAAGGTGGTGACGAGCCTCCCAGGTTACGACGGCCGCCTCCCTTTCTACCTCGAAACAGGT	gz_contig_13587	100	152	gi|255588766|ref|XP_002534712.1|
aj_contig_654	TGCCCGGAGGCGGAAATGATGACTTGCGGTCCTCTGCAGAACCTGCTGTCGACGCACCAGAGCAGCCTGAAGAACCAAAGATGCATGAAGCGAAACCAGTCGTGGAAGAGGAGGCATCCTCAGCAGTGGCTGAAGCAAGCACAGCAATTGATGCTGAAGATAAGCCTAAACCTTCAAAAGTGGTTGATGGCACTGGCAAAAATGGCACTGATGGATTGACCAGAGCCAAACAAACAGTTGTGGAGGAGAAACCGCGAGTTATCCAACCACCAGGAGATGGCCAGCGAATATACCAGATTGATCCAATGCTGGAAGGTTTTCGGAACCATCTTGATTACCGATACAGCGAATACAAGAGAATGCGTGCAGCTATTGATGAACATGAGGGTGGCCTGGATG…	gz_contig_1199	99.86	2201	gi|218194810|gb|EEC77237.1|
aj_contig_657	CGCATCGGCTTGTATGAGCCTGTGAAAGCTTTCTTTGGTGGGGGCACCGTTAATGCCAGCTTATTACACAAGATTCTTGCTGCCCTTGCCACTGGTATCATAGCGATTGTTGTGGCAAATCCAACTGATCTTGTCAAAGTTCGATTGCAAGCTGATGGAAAGGCTAACACTATCAAGAGGAATTATTCTGGAGCCCTTAATGCATATGCTACAATAATCAGACAGGAAGGTATNNNNNNNNNNNNNNNNNNNNNNNNNNNNNNNNNNNNNNNNNNNNNNNNNNNNNNNNNNNNNNNNNNNNNNNNNNNNNNNNNNNNNNNNNNNNNNNNNNNNNNNNNNNNNNNNNNNNNNNNNNNNNNNNNNNNNNNNNNNTCGGAGCTTTATGGACTGGCCTTGGTC…	gz_contig_19878	99.39	491	gi|414588225|tpg|DAA38796.1|
aj_contig_658	AGACACAAGACTTAACATTATCCAACCGCAGACTGCCGTTGCATAGCTCTGCAGCCTCTTATGGCTGAACGACTAGAATTGAACAGCATTTGATGCGACAACGAGTAGAACAGAAGACAACAAAACATAAGGTAAAGGTAACAGGAAACAAAAGAACAGCAAACAAGAATTTGGGAACTATGATATTGAAATTATAACCTAAATGGAGATGAAACAAAGCCTATGATGTTGTACAACTCAAGCAGCACCCCCATATTCAACAAAACAATCCTCGCTCTTTTCCCCTTCCCACCATGTAGCGCCACACCATTCACCTGCTCCTCCAAATTAGCAGATAGGAGACAGATAAATCAAATGCTTTCCTGCACTGGGCCTTTGTTCAAGTTTGCATTGCCTTCT…	gz_contig_4631	99.41	2033	gi|242080917|ref|XP_002445227.1|
aj_contig_660	GCCGCATTTTCGGGGCCGTACATCGTCGTCGCCGGAGCGACGGTTTCACGGGCCAGGGTCTGGCAGGGGGTAGCGGAGCGGAATCGAAGCGATGGATAAGAAGAAGGTGGCGGTCCCGTTGGTGTGCCATGGCCACTCGCGGCCTGTGGTGGACCTCTTCTACAGCCCCGTCACTCCCGACGGATACTTCCTCATCAGCGCCAGCAAGGACACAAATCCGATGCTTCGTAATGGAGAGACTGGTGACTGGATTGGGACGTTTCAAGGTCATAAAGGCGCTGTTTGGAGCTGTTGCCTTGACAAAAATGCTCTGCGTGCTGCATCTGCTTCTGCTGACTTCTCCGCTAAAGTGTGGGATGCTCTTACCGGCGATGAGCTACACTCATTTGAACACAAGCA…	gz_contig_3779	99.55	1346	gi|242096290|ref|XP_002438635.1|
aj_contig_661	TGCTGCCGCCTCATCAAAATTGTCAGGCTTATCTGTCTCCATTTGCTCGCCAGCAGGCTCCTGAGCACCGCCCTCGCTTGTCGGCTCACCAGCTGCAGCACCACCATTTTGTGGCTGCTCCGGAGTTTGGGGTTCCTGCGCTGTGGTTTCAGCCTGCGGCGGCGGTGTCTGTGGCTTGGGTACCGGCTTTGGTTTTGTCATGATCGGTTTGCAGAATCTGTCAAGTGTTTCAGCTTTCTTCTTTATTTCAGATACGAGCAGCACAGGATTAGCATACTTGGGTAAAGCATCCTGCTGCTGTTTTTTTTCTCTCAGCCAATGTTCTGCTTCAGAGCACTCATTGATGACCTTTTGTTTCTCTGATATCTCGATGTGGTCAAACTTCTGGTCATTAGACAA…	gz_contig_4847	100	1280	gi|242089771|ref|XP_002440718.1|
aj_contig_662	AGAGCCCACGGGCCGAGCCAGACAATTACGCACGCAAGAAAAAAAAATTCTCCTCATCTCTCGACCTCGTCGACATCGCCGGCCGGCGGCGAACACAGGACCTCAGCCACAATGACCGCGCCGCTATCCGCCGTCGAGTCCTCCTGGCAGTACCTGATCGACAACTTCAGCGAGTTCCAGCTCGCCACCGTCGTCACCTTCCTGCTCCACGAGACCGTCTTCTTCCTATCCGGCCTCCCGTCACTTCTCTTCGAGCGCTTCGGACTCTTCGCCAAGTACAAGATCCAGAAGAAGAGCAATGCCCCTTCTTATCAAAACAGATGTGTTCTGCGTCTTATCCTCTACCATGTCTGTGTGAACTTGCCTGTCATGATTTTTTCCTATCCCGCCTTCAAATTC…	gz_contig_2476	100	1064	gi|242037065|ref|XP_002465927.1|
aj_contig_663	CAGAGAAAAAAATAACCAGTAAGATATAGAAGTTCTGTAATAATTCTCCATACGATAATATTTATGAGGTTACTCAAAGTACTCATATCAACACTGGTGCGCCAAGTAACACATAGAGATTAAGTTCCAGCTCATCAAGTTTTCAACTACTCCATACTCAATATAAGGGGGAAGCTGTACGCTGCACAAGAAACCACTACACAAGGAGCCGCAGCAGCTATCAGTAGTCGTCTCCTCTGGATATGACTTCTTTGCAGGTTGGCCGGAGGAGGATGGTGTGCTCAAACTGCGAGACATAGCTTCCCTTCACGTCACACAACGGAGGGTATGGCTGGACAATACCACTATCACATAGGTTTTTCAGAGCCATGAGATACTTGGTCTCACCAAGCCGGTCCA…	gz_contig_496	100	1403	gi|242079767|ref|XP_002444652.1|
aj_contig_664	CAAAGTATTAATGCACCTACTCCCTACTAACATGTATTTGCATCATGAAGATTAGTAAAATCAAACACGCAAATCAGCAAATGATTATCAGTACCATATAACGGACAGTTGCTGATTACTTCTTAGTGGTTTCAGTGAAACACGGCAGGACAACAGTACATTACTGGGCTAGCTATATGCGAAGCCACATTGACGTCCAAGCAAGATGACCATAAATAAAGCTTACACAACATAGCCAACATGCAAACCGTTTGAACTGACCAGGGGCTGAGAAGAGGGTTCTTGAGCTGCTGAAGTGAACCATGCATCATAGAGCCGAACAACAAGATTGTAGCAGCCAACATGAAAGGGAAAGGCATGGGTAAACCAGCGGATTCACGTGATGAAGTACCACAGACG…	gz_contig_5917	100	974	gi|254030287|gb|ACT53874.1|
aj_contig_665	GCGGCGAACACAGAGCAGCACCACGAACACAATGGAGGCGGCCCTGTCCGCCCTCGAGTCTGCTTGGCTGTACCTGATCGGTAACTTCAGCGAGTTCCAACTCGCCACCGTCTTCACCTTCCTGCTCCACGAGACCGTCTTCTTTTTATCCGGCCTCCCGTCACTCCTCTTCGAGCGCTTCGGACTCTTCGCCAAGTACAAGATCCAGAAGAAGAGCAACGCCCCTTCTTATCAAAACAGATGTGTTCTGCGTCTCATCCTCTACCATGTCTGCGTGAACTTGCCTGTCATGATTTTATCCTATCCCGCCTTCAAATTCATGGGCCTTAGGAGCTCTCTTCCTCTGCCACACTGGACTGTTGTTGTTTCTCAAGTTCTTTTTTATTTTGTACTAGAAGA…	gz_contig_2511	100	1073	gi|242037065|ref|XP_002465927.1|
aj_contig_666	CCTTCCTCCTCCTAAACCCCTGCCTCCTCCCCTGTCGCTTCCCCAGTTTTGAGAACAATGGCATTCGCTTATAAGCTTGGCAGTCTTCTCAAGAAAACTACAAGTTCGGGTCCTTCTCTCTTTCAAGCAATCAGATGCATGTCAACATCAAAGCTCTTTGTTGGAGGGCTTTCATACAGCATTGATGATCACAGTCTTAGGGAAGAATTTGGAAATTATGGAACAATTGTTGAAGCTAAGATTATTGTGGACCGTGAGACTGGAAGGTCAAGAGGTTTTGGATTTGTAACTTATACCTCATCTGAGGAGGCTTCAGCTGCCATCACGGCCATGGATGGAAAGGATCTCCATGGACGGAATATAAGGGTTAACCATGCCACTGAGAGGACAAGTGGCTTC…	gz_contig_267	100	401	gi|363543257|ref|NP_001241843.1|
aj_contig_667	CTCCGGCGCCGTGTGTCCGCCACCCTTGATCGTTGCGAAGGTCATGTTGTTCGAGTAGCTTATCGTGAACCCGGCTGCCTGGCCGCCGAGATGCCACGCCCTCCAGTCGTCGACGACGGGGAAGTTGAGCGACCTGACCCACGCCTGCGTGCCCAGGTGCGGCACCATGAGGTCGTGATCGCCGCTGTACGCAAGGGCGCGGTAACCTCTGGACGTCAGGTTCCTGTGGTACTTGAGGACGCTCCCGAGCCCGTACGAGTAAGGCAGGTCCCTGTCGTGGCATCTCACCCATTCCTCCTTGGTCCCCTCCTTGATCCCAAGAGCGTCTCGGACACCTCTGTCGTTCGCCCAGTAGTACGACAGGTAGTACCCGTACGTAATGCAACCAAATGTCGGACG…	gz_contig_6368	98.93	1121	gi|242043820|ref|XP_002459781.1|
aj_contig_668	CATTCGTCGAGGTCAATGATGGCTCTTGCTTGTCCAATATGCAATGTGTACTGACTCCTGATACCGAAGGCTATGACCAGATAGACTCTATCGCTACTGGCGCTTCTGTACTAGTTGAGGGAGNNNNNNNNNNNNNNNNNNNNNNNNNNNNNNNNNNNNNNNNNNNNNNNNNNNNNNNNNNNNNNNNNNNNNNNNNNNNNNNNNNNNNNNNNNNNNNNNNNNNNNNNNNNNNNNNNNNNNNNNNNNNNNNNNNNNNNNNNNNNNNNNNNNNNNNNNNNNNNNNNNNNNNNNNNNNNNNNNNNNNNNGGGAGTTGTTGCAAGCAGCCAAGGCGGCAAGCAAAAAGTGGAGTTGAAGGTTTCAAAGATCACTGTGATTGGGAAAAGTGACCCTGTAACATT…	gz_contig_12930	98.96	578	gi|414886704|tpg|DAA62718.1|
aj_contig_669	GTGGCAAGACCTCCTTCCTCAAGTCCAGCACCACTACGCTGTTGCACAATCTCAATCAAGCAGAGAAGTCATCCTACGTGGCTCACATCAATACTTACCTCAGCGAAGACCCATTTCTTAAGAAGTACTTGCCCATAGATCCGTTGGGAAACCAGCTTTTTGATCTCGTCAGGGACGGTGTTCTGCTCTGCAAATTGATCAATGTGGCTGTACCTGGGACCATTGATGAGAGAGCAATAAATAAGAAAAGAGTTCTTAACCCGTGGGAGAGGAATGAAAATCACACACTCTGCCTCAACTCCGCAAAGGCAATTGGATGCACTGTTGTAAACATTGGAACACAGGATTTGGTAGAGGGAAGGCCTCATTTAGTTCTTGGATTGATATCTCAAATCATCA…	gz_contig_1820	100	1625	gi|357137333|ref|XP_003570255.1|
aj_contig_670	CCGCCACGAACCGCTCTGCCCCGCGCTCTGACTCGAGGATCTCTGCTCATCAAGAATCTCCATGGAACATTTAGATGGAGCCTCAAATACACATGGACAGTGGCATCCTGGTGAATCACAGAGACCTGAAATTGATGATGCGCCCATTTTCACTCCATCTGAAGAGGAATTCAAGGATGCAATCAGGTATATTGATAGCATTCGTCCGCTAGCAGAAAAATATGGAATTTGTCGTATTATTCCACCATCTTCTTGGAGACCTCCATGTTCTCTGAAGGATAAAAGTTTCTGGGAGCGTACAGAATTCAATACCCGAGTTCAACAAGTTGACAAGCTTCAAAACAGGGAGCCCCCAAAGAAAAGAACACAACCTCGAGTTCAGAGGAAACGAAAGAGGAG…	gz_contig_720	99.44	2156	gi|115463075|ref|NP_001055137.1|
aj_contig_672	GGTGTTCACATATCTGGTTTGGAAATAACAAGTAGAAGTCCTGGCAAGCCTAATGCTTCAGTGAAAAGTGAAGGAAAGTTTTGTCAAGAAAAAAAGTCCTGTAAATCTTCTGCACAGATGACGAATTCGTCCCAGGAAGAGTTGTATATTGATAACTCAGCCAATATGGAGAAGATATCTTCTGATTATTCCCCTAAGCACAGTGGCCATAACCAAATCTGCACACCTGTGCTCACACCTTCTCGTAAAAGGAAAGGAGATACTTCAGCTGGCTTTTCAATGCGTTTGAGATCAAGAAAGGGCGAGGTTGTTCTTCTGGATGGAGACACACCCCATCAAGAGTCTGCAGACGAAACATCAAACAAGCGGAGCGCAGGAAAGCTATACTATCCTACAAGG…	gz_contig_5179	99.74	1175	gi|357118029|ref|XP_003560762.1|
aj_contig_673	CGTGGAGCGAAGCTCCGAGTCCTGAGGGATTTCGAGACTTATAATACAAAGGTATCCTGGTGGAAATGAGGGGCTACGAGTATGAAACCAATGGTTACCATCGGGCACTTGAGGATGAGTATGAAGATGAATACTATGATCAAGATGAGTATGAAGAGGAAGGTTCAGGTGCTGCGGAGGAGTATGTGGAGGAAGATCCCCCAGAGGGACAGAAGGAGATACTTGAATTGAGAGAACGATTGAAAGAGCAGATCAGGCAGAAGGCGCTGGCTGCTGGTGCCAGCGCAGCTAGCCGGTCATCTTCTTCACGTGATAGAGTACCTCCAACCAGAGACAAATTTGGCTCCTTCTTTGGACCATCCAAGCCAGTGATTTCTCGACGAGTTATTGAAGAAAGGA…	gz_contig_8430	98.58	1688	gi|242076744|ref|XP_002448308.1|
aj_contig_674	GGAAAAATTTACAATGCCAGCAGCAAACAGAAGAAAATTAACCAAGATACATAAGATTTTACTGTTGTATCCTCATATCAGAATCTGGAGAGTATGGATGGATGGACAGATTATGGATACGTTACTCAAAATGTTTGTCAAAAATACTAGTCATCATAAAATGTTTTTATCCACTCAACACCAACCAATCAAAATACTGCTATCTCATCACTCCCAACTTTTCGATCTATTTCATTAGTATATTCTTATAGAAGGCTTGAACTTGCAGCTTCTTGAAGTAGCTACACCAGTGATCACAAAAACCACCAGACGAATATCAGTGCAAATTTCTAAAAGTCATGTTGGTTGCTGCACTCTTCATGCTTATGCCCAGAACGAGGATGTTTGAATCCATTTGTG…	gz_contig_658	100	2123	gi|242076160|ref|XP_002448016.1|
aj_contig_675	TGGGAACAAAATTTCGATACATTCTTGCTGTGACCTATTTCCTCAGACCCACAGCAATACCTACCTTTTTAGTCCCTGAAGAATTCTGTAATGGTCACCATTACTTCTTTTTGGCAAACCGCAGCAAGGCTTTTGGCAGCTGTGCCTCCNNNNNNNNNNNNNNNNNNNNNNNNNNNNNNNNNNNNNNNNNNNNNNNNNNNNNNNNNNNNNNNNNNNNNNNNNNNNNNNNNNNNNNNNNNNNNNNNNNNNNNNNNNNNNNNNNNNNNNNNNNNNNNNNNNNNNNNNNNNNNNNNNNNNNNNNNNNNNNNNNNNNNNNNNNNNNNNNNNNNNNNTCCTCACCGACCCGTTGCTTCTTGTCAGGTCCCCCATCATTTTCCTTCTGTTGATCCAGGAATGGCC…	gz_contig_8161	100	1313	gi|242061750|ref|XP_002452164.1|
aj_contig_676	GGCCGCCGAAGGAGGAGGATATGGCGCTCTCGGGGATGCGAGGGCTGTCGGTCTTCATCAGCGACATCCGCAACTGCCATAACAAGGAGCAGGAGCGCCTCCGTGTCGACAAGGAGCTCGGCAACATTCGCACGCGCTTCAAAAACGAGAAGGGCTTGTCACCGAATGAGAAGAAAAAATATGTATGGAAAATGCTTTATATTTATATGCTGGGCTACGATGTTGATTTTGGGCACATGGAAACTGTTTCTTTGATATCTGCACCAAAGTATCCTGAAAAACAGGTTGGGTATATTGTGACATCTTGCTTGCTGAATGAGAATAATGATTTCCTAAGGATGGTTATAAATACAGTACGGAATGACATAATAGGACGGAATGAGACTTTCCAGTGCTTAG…	gz_contig_8100	100	3395	gi|414864333|tpg|DAA42890.1|
aj_contig_677	GGTTTTGTCATGATCGGTTTGCAGAACCTGTCAAGAGTTTCAGCTTTCTTCTTTATATCAGATACGAGCAGCACAGGGTTAGCATACTTCGGTAAGGCATCCTGCTGTTGCTTTTTCTCTCTCAGCCAATTTTCTGCTTCAGAGCACTCATTGATGACCTTTTGTTTCTCTGATATCTCAATGTGGTCAAACTTCTGGTCGTTAGACAAAGCAGCCTCTCTGAAACTGTTGATGCAATATACTAGTTGGTCAATAGCAGAGCCTCTTTCCGTCCACTCCTTGTACCTTATCTCGATAGGATCACCAATCTTTTTAAGTTCTTCCAGCTTAGCAATATAGACTCCCTTTGTCTCATCCTCACCATCTTCGTATAGCCAATCCTCAACCTCTTGAAGTTTA…	gz_contig_31	99.39	1961	gi|242089771|ref|XP_002440718.1|
aj_contig_678	AGCCTCAAGTCCCATTACATAGCAGCAATGTACTTGTTCCCCCAAGAAGGGAAACACAGAGATACATCTATTTAAAAGTACATCGAGTAATATTACAAGTCATACAGAAACGTAATAGCAAAATCCATGACTAATAGCAAGAAACATGGACGAGTTACACCCAAGACCCAAAATAAGCTAAATTTTACCAGGTTCAGATATTTCAGGTACATATCTACTGGCTGAAGCATCTTCAGTGTCTTCATCATCAATTGCCTCCAGCATCCTTGACATCGATAGTGAATTCGTACTCCTGATCACAGCCAAGGTAAGAATCTGACATCAAGTAAATCATGTAATCCTTTCTCCCTGCTTCTCCTGGAGCAGTGAACTCAAGTTTCACTCTTGCCCTCTTTTGGA…	gz_contig_2471	99.61	3797	gi|242051028|ref|XP_002463258.1|
aj_contig_679	ATATATCAGCTTAAAGACTGACGGAAGAATCCTGCTACTCGCACTGATGCCCATGCAACATTCCCAAAATGGATCAATACGAGCAGCCACAACCTACCTAAACTATGAAATATTGCGAGTGCATAACGCATATTTACAGGCCAGACAACTACCAGGAGAGGCGACTCAACTAACTCTACTGGTCTTCCAGTCACCTCTTGTGGTGGAACCTCACCTTCAACAAGAACTGCATCTTCACCTGAGATGTATTGTAGACGATATACTCGTTATACAGAAGCTCAGATGCCCTGACTGATGATGGCACAGGCTTGCCGCAAGGAACAACAACATCATCCCTCCACTTCACGAACTCTGATTCCAGCGGCACAGTTTTGCCCAACCCCTTGGTCGAATGCTTCC…	gz_contig_9880	100	2033	gi|242043768|ref|XP_002459755.1|
aj_contig_680	TGTTATCCTTCAGTTACGCACCAGATATGCCCGCGTTGCCCACCTGCCGTTTTTCTTGGTTTGTCTCCGGAGAATCTGCATGGCAGCGATGGCTGTCATCTGCAACGCACCAGCCCATCTGAATTGCCTGCCAATTGCTGAGCTGTTTGAACACAGCTTCTGTACGAGCTTCAAATGATGGTAGCCAGAGATGAGATATATAATCGGCTGTTATCGGCCATGTGCCATCTTTCGCCTCTTCCTCTCCTGCTCACGTCGCTCTTCTTCCTCAATCAAGCGAAGCTGTTCCTCATCCTCCTGCCTTGCAATCCTCGCGCTTCTTTTTTCTTCCCTTTCTATAGTAGCAAAATCTGCTTCCATGTCACTATCATCTTCATCTCTGCCGGCATATTTACTAGG…	gz_contig_8433	100	1730	gi|48374960|gb|AAT42158.1|
aj_contig_681	CATTGAGAGGCTGATCTTATCCAACAATTACTTTGTTGGACAGATTCCTGCTGGCATTGGCAACCTGACAGAGCTTGTTGCCTTCAACATTTCATCCAATCAGCTCACCGGGCCAATTCCACAGGAGCTAACATGGTGTACAAAGCTTCAGAGGCTTGATCTCAGCAGGAATTCCCTTACTGGAGTAATTCCTCAGGAGCTTGGTTCTCTAGTGAACCTGGAGCAGCTGAAGCTATCTGACAACAATCTGAATGGAACCATTCCGAGCAGTTTTGGAGGTCTTTCACGGCTAACCGAGCTGCAGATGGGGGNNNNNNNNNNNNNNNNNNNNNNNNNNNNNNNNNNNNNNNNNNNNNNNNNNNNNNNNNNNNNNNNNNNNNNNNNNNNNNNNNNNNNNNN…	gz_contig_17853	99.31	872	gi|242047436|ref|XP_002461464.1|
aj_contig_682	TCATACCCACGGCCAGTACCGCTATGGCGCTCATATGTCCTCCGTGGAGGCCTCTCTGAGTCATCACCAAACTCACCATCACGGTATCCACCACGCCGGAATCCACCTCCACGGTAGGGAGGGCGAGCACCCCTCTCACCTTCTTCACCTCCAGCTCTGGCGCCATATCCTCCCTGAAATCCATTGGCCTCTTCACTGCTGAATTCACGGTTTGCACCATAGCCTCGCCCGCCTCTGCC	gz_contig_3035	100	236	gi|242088589|ref|XP_002440127.1|
aj_contig_683	TATAGAGAAATGGATGGTTGGCAAGAAAACACGCTGGAGTAAGCCTAACAAAATTCTGATTACACAAGTATCTCTGATATACAATGTTAACAGAGATGGAAATAAAACACACGTAGTAGCATTATTTGTCTGGTAGCTGTAGCACGGTAGCATGAGGGTGAACAAAACTAAAGATGACAGCAAAGATAACGTGCTGGTTTCAGGCAATAGATGTGTTCCTCTTGATCGCTAAGCACCAAGCGTTGGGAATTCGGATTTGTCTTGAATTGCAGGGGCAGGTGGTGGGGCACGGTAAGCCCCACCGTATCCTCCTCTGAAACCACCACGTTCCCCACGGCCCCTGCCTCTACCGCGGCCACCATAGTACCTTTCCCCTTCAGCAGGTTTCAAGAACTCATT…	gz_contig_2313	100	689	gi|242088589|ref|XP_002440127.1|
aj_contig_684	GGGAAAAAAAAGATCCATTTTTCTTCTTCCGAGTTCATCCTATCCCCGCATTGGCTTGGATTTGTTTGCTGGACGGCAAGCCGAGATGGACGACGACGGCAGCCTGGGGATTCGGAATTGGGGCTTCTACGAGACGGTGAATNNNNNNNNNNNNNNNNNNNNNNNNNNNNNNNNNNNNNNNNNNNNNNNNNNNNNNNNNNNNNNNNNNNNNNNNNNNNNNNNNNNNNNNNNNNNNNNNNNNNNNNNNNNNNNNNNNNNNNNNNNNNNNNNNNNNNNNNNNNNNNNNNNNNNNNNNNNNNNNNNNNNNNNNNNNNNNNNNNNNNNNNNNNCATCGTGAAAGGCAATCTCGGCCTGCAGCTAATGTCGCCCGTTGCACCTGACCGGGACACCAAGTCGCTG…	gz_contig_10395	98.41	377	gi|242092150|ref|XP_002436565.1|
aj_contig_685	GCCGCGTGCAGCTCCGTCTCGTCGGTCTTGTCGGAGTCGATGCTCAGAGCCACGTTCTGCCGCCTGATGAATTTGAACATGGGCGCCTCATTCTTGAAGCCCGTAACCTTCAGCACGTCGCCCACGCGATACCGATACAAACCGGAGTAGGTGGTGACCACGAGCTCGTACTCGTGACCGAGCTTCACATCGACAAGGTCAACCAGGTCACGGTGGCTCGGCTCGGCATTGCCGTTGCTGCAATGGAGAGGAAGGAACTCGAAGTAGCACATGGTGGGGATGAGCGTGTATGCCACGTCGCTGGGCTTGCACATGGGGTTCAGGTTGAGGCCAAAGTAGCACTCCGAAGAGGCGTACATGGTGCACGTGAGCGGTAGGCCACCACCGTAGAACTCCAGC…	gz_contig_15632	100	530	gi|414880196|tpg|DAA57327.1|
aj_contig_686	AGAGCACTGGACCATCTTCAAGGAAGAACACTTCCTTGTTGTCTTCCTTGGCAGAAAATACAGTGCCAGAATGTATTTACTAGTACTATTTCCTGTCCAGTACGCATTTACAATGTTATTAGCCAGACGGTTGCTTCTCTGCTCGAAAGCTTCCGAACCCAAAAAGGTGTGTCGTACAATTTAGAAAAGAATGAGAATGGCAATTTCAGAATCAAGCTCACCGCAAATGCCACAAAAACAATAGCAGATTTGAGAAGGCCTCTGGAGCTTTTGATGAAAGGCAAAAATGTAAACCATCCTGAACTGACATTGAGTGTTGTTCAGCTGCTCTTCTCCTGTGATGGTATGGCACTTTTGAAATCAGTTGAAAAAGATACTGGGACTTACATTTGGCATGAC…	gz_contig_9668	100	905	gi|242050900|ref|XP_002463194.1|
aj_contig_687	CAAAAGTTTTCAAAGCAACAAAAATTCAACCAGTTCACAGGGTATACCAGATCAAGATTCAAAGTAACAAGCAAACTCTTTCATAAACATTAATATAAGGCCTAGATAATTCTGCCTCTACTCAAACGCAAGCTCACTTAAAGCACTTCGCATCAAGCAGGGCCTCACCCTCGAAGGGCTCCTGGTCCTCAATCATGGCATTGACACGCTCCTTTTGGGCCTCGTCAGAGATGTCAACCTTAGTCCACTCATAGAGCTCCATGTCATAGACCTCGTCCATGACGAACTTGGGGATCTCCTGGCCACGGAAGAGCCAGAGGCCCTTCACCTTGAAGGGTGGCTCAGAGCCAATCACAAGCATCTTGCCGAAGGCATACTTGCGGCACAGATCCATGCGCT…	gz_contig_1622	100	842	gi|226505800|ref|NP_001148829.1|
aj_contig_688	AGCTGCAGGAGGGGAGCGAGCTGCGCCCGAGGCTAGCCGGAGAGGGAGAGGTAGACGGAGGTGGAGCAAATCTTCGAGGGGAATCAAAGAGATTTCTTCTGCGGAGGACAGGAGGCAGCCAAAGGCATTCACTGCTATATTGATTTGATGCAAATCTGATTTGGCATCTGTGAGAGATGGCTTCAGCAGGTGTAGCCCCATCTGGGTACAAGAACAGCAGCGGCACCAGTATGGGCATTGAGAAGTTGCCTGATGAGTTGAATGAATTAAAGATTCGGGATGATAAGGAAGTTGAAGCAACCATCATCAATGGCAAAGGGACGGAAACTGGGCACATAATTGTGACAACTACTGGTGGCAAGAATGGTCAACCAAAACAGACAGTGAGCTACATGGCTG…	gz_contig_10329	100	1691	gi|226533162|ref|NP_001148880.1|
aj_contig_689	TCTGTATCAATCAGTCCACAACATTTTTAACAGAACAAGCTGATGCATCAGCATACATACAGGCATCTTTCCGCAACATTTCGATGCACGAACAATACTCGATACAAAGCTAGCTAGCTACTACTCCTGAGTCCTGATCAGCTCTGTTCGGCCGCACCAGGTATGGGAGGCTCGTCACAATGGATTGAGCGAGTCGGAAAGGGGTCCCGTCCTAATATTAGTCCCCTTCCTGTAATCTAATCTCTGCTTCAATAATCAGATCTCCTCCTCCCCACAACAACGATCGTTTATTCTAGTAGTAACAAAAATATAAAAAAGAAGCAGCAGCAGCAGCAGGCATGGAAGCCTGTGCTGCGTAGTATGTACACGGCGGCCAACCAGCAGCTAGTGCCCCTTGCC…	gz_contig_15325	100	296	gi|326501614|dbj|BAK02596.1|
aj_contig_690	CCGGAGAGTTAGGAACTTGTGATCCCAGGTCGTCTGTCAGACGTCCCAGTTGTGTTATCATACATAAACCATCTTATATAGGAGTACGAATATAGTAATGGATCCAATATTTCCCTTATGTTCCCTTCCATAGCGGTTCTGGGCAATCATCCAAGTATTCTTGAAGTGGGCATGTAAAAATAGTCCGTATTATCAATGCCTGCGTCCTTTCTGAGTAAAATAAAATATTTCACCAAATTCCAGATCCAAAATAGAGATCATTATCAGGCACCTTTTGTGTTCGTACCATAGCTATCTTGTCATCTGCAACATAGCCTATGGGGAGCGCGATAGTTCCTCTGACATCTAATTCAGATGATGTTATCACTTTCTCACTTTTCAGTAGCCTGACCTATTGAA…	gz_contig_20064	100	551	gi|414869870|tpg|DAA48427.1|
aj_contig_691	CCGTTCCTCAAAACCCCTGTTGATGAGGCTACTTTTTTAATACATGATACCAGCCAACAGTTTACTGCAGAAATAGCAAAATGTAGTAAAGAAAGCTGAGGTGCAACTCTCGCATGTCACACATAGTAGGAGTTTGACTTGATGGGTTCCTACTCACTTACTCCAGGTTCATCTGGGGTAACCTGAGCACGGATCGGCACCCGAACATGATCTGCCTCTGCTTTGTCGTTTTCTAGCTCTTGTGTGGGCGAATGAGACGTTGTGATGTCAACACTAACTGTTTGCTCCGATGGCAATTTCGGGAGAGATTTCCTTTGGGGTTTCTTCACTGCATTAGGAGCAGATACTTTCTTGGCGCTGTTCTGAGAGGCCCTTTCATCAAGGCTCATACGAGCTGGA…	gz_contig_3609	100	728	gi|219884595|gb|ACL52672.1|
aj_contig_692	TATTGAGTTACACAGATAAAGCCACCGAGATGTTGATAGCAAAGTAGCGAAGCGAGACATTAAACAAGTCTTACAACATTAGTTGTTGTAAACAACACAATAACAGATGGTTCGAACGAACACACATAAGTCACACACGACAAGATAAAAGGGCCCCTCGGGCAGATCATCGGATAGCAGCGGCACACAGGCCTGACACAGCACCAGCATGAAGCGGCGGCATCTAGCACTCGTCACCCTCGTCGCCTTCGTCGCCCTCGTCGAACTCAGCGCCGACCTCCTCGTAGTCCTTCTCGAGCGCAGCCAGGTCCTCACGGGCCTCCGAGAACTCACCCTCCTCCATACCCTCACCCACGTACCAGTGGAGCGCAGCCAGGTCCTCACGGGCCTCCGAGAACT…	gz_contig_163	99.31	1310	gi|379054882|gb|AFC88832.1|
aj_contig_693	GCCAAAACTTCTCAAAATAACACAAATTTTAACCAGTTCACAAGGTATACCAGATCCGCATAGACATAATTAACAAGCAAACTCTTCCTTAAAATCATTTCAAGGCCAAGCTCCACGCGAACGAACTCTTAAAAATCAATTCAAGGGCAGGCTAATTCTGACTCCTGGCAAACGCTAGCTCACTTGAAGCATTTCGCATCAAGCAATGCCTCACCCTCAAAGGGCTCCTGGTCTTCAATCATGGCATTGACACGCTCCTTCTGAACCTCATCGGAGATGTCAACCTTGGTCCACTCATAGAGCTCCATGTCGTAAACCTCATCCATGACGAACTTTGGGATCTCCTGGCCGCGGAAAAGCCAGAGACCCTTCACCTTGAAGGGGGGCTCAGAGCCAATC…	gz_contig_1637	99.65	863	gi|413943829|gb|AFW76478.1|
aj_contig_694	CCCTAAATAATCTGAAAACAAATGTTCCAGAATATAATCAGTTACCAATTACCACAATCTGACAATACATGGAACAAGATAACTAATTGGATTTTTGTTAAGCTTCTACACATCATATAATTATTCCTTGCCGTGCACTCTATTGCACAACAGCATGTCAGCATAATCCCATGGTGCCATCAACAGCAGTACGTTGGTACAAGTTTGCGCATCCTATGTGAAGGCTTCAGCGTCATGATTGAAATCCAGTCTTCAGCAGGCAAAAACGCCGCCTGATGTCAAAATTGAGGTGATAGCTGAGGCACACTATACCTGCAGGCCCTCCTCTAGGGTTGCAAAGGGCAACATGTCTCAAGCTGCTCACGTTAAGTAAATNNNNNNNNNNNNNNNNNNNNNNNN…	gz_contig_6499	100	1187	gi|223974755|gb|ACN31565.1|
aj_contig_695	GGTAATTAGTATGGAAGAAAAATCAGTATCTAGGCGTGATCTTGTACAACCCATTTCAAGGGTAGGTTTACAACAGAAGGTATACAACCTCAAGCAACAGGCAAAAAATCAAGTTACATATTCATAAAGCTTTAAAAAAGGAGGAAAGTGCACTGCCGGTCCTTGTTTGGCATGCCTACGAGAAGGTATCCTCCCTATCTCCTTCTGCAACCTCTCCCTCCTCAATGTTGCTGAACTCCAGGAAGTGAGTCGGTCTGTGGTCCTCGTGGTAGAAGTCCCGGGGCATGCTGAGCTTCATTGCATACTTCATCAGCGGGTCATGCTTTACTCCCATGAAGTTGTAGTTCCAAGGAACGTTGTCGGGGACCATATAGAAGCCAAGGAAACGGTCACTAAGAA…	gz_contig_1396	99.78	4055	gi|413953016|gb|AFW85665.1|
aj_contig_696	TGGCATGCGAAGAATGAATCAACTATGTACCAACTCTTTCTTTGCTGCGCTGCTGCTATTTTTTCCCCTCCATCCTGCAGTTTGGACAAGACCCTGATAAATCAGCAACTTCCCCAAATGTAAACCTGGTTGGTTAACTAGCAGTGGCGTTCTCGTCAAGTGTTAAGATTTGCGACGCCTTCCTCAATGCCACCTTCGAAATCCTCCTCTTCCTCTTCCTCTTCATCTTCTTCGTACTCCACCTCCTCTTCCTCCGGAAGAGCTTCTTGTGACATTGACTGTCCAGGACTATGGTAAGGCCCTTGTTTCTGCAGGCTCCAGTACATGATGCTTGCAGTAAGGGTGAGAATCATCTTTGGATTCACCTCCATTATATCTTCTGGTAATAAGAACACTGTG…	gz_contig_13150	100	563	gi|413937524|gb|AFW72075.1|
aj_contig_697	GGCGAGCCTGCAAGGCTGCGACGTCTTCGAGTCCAGCTTCTCTTCTCCCCTTCCGGTTCCGGCAGCCTGGTAGCTGTTTGATTGGGTTCGTCGATCTCCGCCGGAGCTGTGAGCCATGGCCACCACCACCGAGACTGTTGTCCTCAAGGTTACCATGTCCTGCGAGGGCTGTTCCGGCGCGGTGAGGAGAGTGCTCTCCAAAATGCAAGGGGTTGAGTCCTTCGACATCGACATGAAGGAGCAGAAGGTGACAGTCAACGGCAATGTGAAACCAGAAGACGTGTTCCAGACTGTTTCCAAGACGGGGAAGAAGACCGCCTTCTGGGAGGCTGAAGCAGCTGCCCCGGCGGATTCGGCTCCAGCAGCAGAAGCTGCTCCTAGCACCGCCGCCGAAGCTCC…	gz_contig_3763	97.77	536	gi|357149299|ref|XP_003575064.1|
aj_contig_698	GTGCTTGCTGTGCTGCTGGACAGGTTCTTTGACATGGAATACGCTGAGTGTGTAAAGGCTTTTGAGGCATATGCAAGTGCTGCAAAGCAGATTGATGAGCTCTGTGCCTTCTATTCATGGTGCAAGGATACTGGGGTTGCTAGGTCATCAGAGTACCCAGAGGTTCAGCGTGTCACTGATAAGTTGCTGGAGACATTGGAAGAGTTTATGAGGGACCGTGCTAAGCGACCAAAGAGCCCACCAAGGGAGCCAGAGCCAGAGCCTGTCAAGGAGGAGCCTGAGGAGGATATGAACAACATCAAGGCACTTCCAGCACCAGAGGATTATAAGGAGCCTGAACCTGAGAAGGTGGAAGAAGAGGTGAAGCCAGAGCCACCCCTGCAGCCACAGGGTGATCTG…	gz_contig_6922	100	992	gi|242036175|ref|XP_002465482.1|
aj_contig_701	CCCCGCTGCTGCTCGAAGCCAGTGAATTGCTTTCAAAAGAATGGAAGAATCTGTTTTGGGATTTTATTGAACACTGGAAGGAACTGGACAAAGGCTCTGAATGTTTGACAGCAAAATGCTGCGTGCAAAGGATTGTTGAGGATGCCCGTGCGGTTCTCAATGAGCCACTTTCTATGATCTTTGAGTTTTCTCTTACCCTTCGATCAGCATCGCCTAGATTAGTGCTTTACAGGCAGCTTGCTGAGGAGTCATTATCTTCAGTACCATTTGATGATTCACTGGAGCAAAGTTCTTATCATAGTACTGAAGAAAGTTTCCTTGAGGCTGGAAGTCCCAGCACATCTGGAGGAACTTGCTGCTGGGTTGACACAGGGAATACTTTATTGTTCAATTCAGCTG…	gz_contig_8829	99.94	4895	gi|242066908|ref|XP_002454743.1|
aj_contig_702	ATGATTATTACCATCATCGTTAAATTTCCCAATGGTATTTGTTAGCCTCATTTCGGCAAAATTTGTAAATAATTACAAGCAACAACACAAGGCTCTCACCGGCCTCCAACTATATACGGGACAAATTAATCTCATGTTTGTTTCGTCCCATCCCATCCATTGTATCTATATTATCAGGCTACTGTATTGACCATCATATTATCCTCGGATGTCAAGTCCATGACGACTGATCGATGAACGATGACCTCGCCCGCGAGAGCGCCTCTGGATCACCATCTGAATCGCCATCACATCCTCCAAAGATGCCAAGCTCCAACGACAAAGAATCCGTCATCAACGGTGGTGGTTCGAGAACGGCCACCATCTCCTCCTCTTCGTCGTCTGAGACCTTGGAGCATC…	gz_contig_9227	100	758	gi|242067000|ref|XP_002454789.1|
aj_contig_703	CTCTTATCCCCACCCACCTCACCTCCCCCTCCCTTTTCCTTCTACAAGACAGAAAGCGACCGCCACTGCCGCACCAGAGGTGGCTGCACCGCACTGCACTGCACCAGCAGAGAGAGTGAGGTGTTGACTCTTGAGCGGATATCCCTCGAGCATCCGTGACGACAGATCGAGAAGAGGAGAGGAAGAGGAGGAGGAGATGAACGCAGATTTCGGCGCGCCCAAGGAGCTCGCGGGGNNNNNNNNNNNNNNNNNNNNNNNNNNNNNNNNNNNNNNNNNNNNNNNNNNNNNNNNNNNNNNNNNNNNNNNNNNNNNNNNNNNNNNNNNNNNNNNNNNNNNNNNNNNNNNNNNNNNNNNNNNNNNNNNNNNNNNNNNNNNNNNNNNNNNNNNNNNNNNNNNNNN…	gz_contig_15870	100	1550	gi|219885381|gb|ACL53065.1|
aj_contig_704	GAGAATGCAACTGCAGCAAGGAAGTTATTAGATAGACAAATGTCTATTAACAGTGTGCCTAAAAAGGTAATTGCATCTCTGTTGAAACCTCGTGGCTGGAAGCCCCCTGTGCGAAGGCAGTTTTTCTTGGACTGCAATGAGATTGCAGATCTATGTGACAGTGCCGAGAGAATATTTTCAAGTGAACCAAGTGTTTTGCAGCTTAAAGCTCCTGTTAAGATTTTTGGTGATTTACATGGTCAATTTGGAGATCTTATGAGATTGTTTGATGAATATGGTGCTCCTTCGACAGCAGGAGATATCGCTTACATTGATTATCTATTTTTGGGAGATTATGTAGACCGTGGTCAGCATAGTTTAGAAACCATTACTCTTCTTCTTGCACTGAAGGTTGAATAT…	gz_contig_246	99.8	1523	gi|242033549|ref|XP_002464169.1|
aj_contig_705	CCCCAAGGCAAGCTCAGAACGTTTCAACTGCTTTGCTTCCTCTGACAGCGGAATCACAGGATCCTGTAGCTAGTTTGTTTTCTACAAACGACGATACCAAACAACTACACAAGCGACATTGAAATTCGACCAAACCAGAAAAAATTCTGAGGTCTTTGAAAGTTTTAATCTAAGCAAAGTATGACGAAGAGGAGGATGTATCACGGAGCACCTCCAGTTGGTCTTCTGTGAAGGCCTCTTTTTGGATGCTCCATGTATCAGCATGTGTCCGTTTAAACTCTGCCACGGCCTTTGTGACGGTTGATCTTACGGGAGAAGGCTCACTGATGAAGGAAGCGAGCAGCGTAACGTGCGCAGGAAGCCAGCTAGGCATGTCATATGGAACAGAAAGGACTGATG…	gz_contig_1237	99.93	4181	gi|357124474|ref|XP_003563925.1|
aj_contig_706	GCACACCCTGTGAAGTACGTACCATCTTTCTACCAACACATTCGGATATCAGTGAAGCTACTAGTCTGACTCTGTGCACGTTATAACGCACATTGCATCACAAATCACAAAATGTTCTTTTTTTCACACACATGGACATAAACAAACACACGGGGCTACAATTGTGACAGCCACTCTCGATCGAGTAGAAATATAATGGAATTGTCATCGCATTTTTATTTGCTTCATAACCATTTCCTCAGGGTAGCCATGTCGGCATGAAGTTATTCATCTGCTCATGGGCGAATCCAATCTGCAGGGTTGGCTCCGCGGCAGCGTCGACCAGAGGATGAAAGAACCCATTGCCGGCATGTGGTGGCGCCTGCTGTGGGGACTGACTCTCATAACCAACTAAGTTGG…	gz_contig_5631	99.14	695	gi|194688638|gb|ACF78403.1|
aj_contig_707	CAAAATCTTAACCGTTACCCATGCGTGCTCTTATACAATTGCCCATTACAAGGGCAGGCTTACAACAAAAGGTACAACCTCAAGCATCAGGCAAAACATCAAGCTACTGGTTCATAAAGCTTCAGAATGAGATGGAAGTGTGCTAGAGGTTTAAGAACTATCCTAATATTCCTAGCTTGGTATGCCTACGAGAACGTATCCTCCCTATCTCCTTCTGCAACCTCACCCTCATCAATGTTGCTGAACTCCAGGAAGTGAGTCGGTCTGTGGTCCTCGTGGTAGAAGTCCTTGGGCATGCCAAGCTTCATTGCATACTTCATCAGCGGGTCATGCTTTACTCCCATGAAGTTGTAGTTCCATGGAACATTATCCGGAACCATATAGAACCCAAGAAAACGG…	gz_contig_1392	100	4088	gi|46981339|gb|AAT07657.1|
aj_contig_708	TGAGGACTGAATATTGGATTAATCAGCAGGAGGCATTCACTATCAAACAGTAAACAGTGACACTGACAGACACCAGGAGTTCAGTTTAAGATAGATATATTAAACCGGGCCGCACGAGCGGAGGACAAGATCATCTGATCATCAGGTGTTTCAGATGAGGAATATTCAGATCAGATGACCCCAGGACACAAACACTAAGATGCAAACGATAAGCTCTTATTTAGAGTTTTAGACGATAGTCATAGGCCAGGCTGGGGTCCTCGTCGTGGCCGGAGACGGCGCCGTGGCGCCTCAGTTGCAGGAGCAGCAGGAGCAGCCGCAGCTGGTGCCGCACTTGCAGGTGCTGCAGTCGCAGCCGCCGTTCTCGGCCTCCGCCATCATCATGCCGCCGGAGCTCCC…	gz_contig_2500	100	236	#N/A
aj_contig_709	CGGTAAATGCCGTGCTTGAAAGTTATATCACAACCTTGGTGCACTTGGCGATAAATTTATTGAGCTTAATCAATTTCCTACTAAATTGAATAAAGTTATCCCATCAAGTTACATCTAAGACTCTTTATGTCGAGTTTGTGGTGACTGTCCCTCTTGATGTATGTTCCTAGGAAATAGAAGCTCATGTATTTGCTTCTCCGCACTGAACTCTGAAGTGGCCTTTATTGGGAAAGCAAATCTCAATGTCTGCACCTGTGTTCCTGAGCACACTCTCAAGTCAAAGCCAAGGCAGTCCACTCCGATCACCGCAGCTTCCTCTACTTGAATTGCCTTGCACCTCCAGCAGAGTGATTTCAGAGCCTGTGTGATCTTGTCTCCACCGGCTCTCAGGCGCGATAT…	gz_contig_17240	100	824	gi|259490018|ref|NP_001159266.1|
aj_contig_710	TTAGCATGTTCTATTCATTTGCTAGTGGGTTAGGCACTAGGCAGCGATATCTACACAGTTAGCAGCATCAAAGATGTTACATCCCTACAATTTCTATTTTCTACTACTTTTGTACTACGCAAACACCGCTACAAAACTAGTATTGCAATCCAGNNNNNNNNNNNNNNNNNNNNNNNNNNNNNNNNNNNNNNNNNNNNNNNNNNNNNNNNNNNNNNNNNNNNNNNNNNNNNNNNNNNNNNNNNNNNNNNNNNNNNNNNNNNNNNNNNNNNNNNNNNNNNNNNNNNNNNNNNNNNNNNNNNNNNNNNNNNNNNNNNNNNNNNNNNNNNNNNNNNNNNNNNNNNNNNNNNNNNNNNNNNNNNNNNNNNNNNNNNNNNNNCAAGGATTGCTGCGAGTCCTGGC…	gz_contig_15333	100	1001	gi|242058463|ref|XP_002458377.1|
aj_contig_711	CTCCTGTGCCCCGCTCACTCCCACCTCACCGCGTACCCAGTCCCCGCCTGCCACGCACGCTCACAACCTCCCGGCCTCCTCCTCCTCGTGCTCCTCCCTTCCACCGAAGTGAGTCACGCCGCCTCGTTCCAGCTCGAAGAATTTTGCCGCTTCGGAGTGTCCGCCGTCCTCGCCGNNNNNNNNNNNNNNNNNNNNNNNNNNNNNNNNNNNNNNNNNNNNNNNNNNNNNNNNNNNNNNNNNNNNNNNNNNNNNNNNNNNNNNNNNNNNNNNNNNNNNNNNNNNNNNNNNNNNNNNNNNNNNNNNNNNNNNNNNNNNNNNNNNNNNNNNNNNNNNNNNCCGTCCTCGCCGTCTCCATCTTCGAGCCGGCCACCGGGTGGACATCCATCCGGACTGTACCGA…	gz_contig_871	99.81	1601	gi|115447663|ref|NP_001047611.1|
aj_contig_712	GGCGCCGGCGGTGCGACGGGATCCCTACGAGGTTCTCAGCGTGCCCAGGGACTCCTCCGACCAGGAGATCAAGTCCGCCTACCGCAAGCTCGCACTCAAGTACCATCCTGACAAGAATGCTAGTAACCCAGAAGCATCGGAGCTCTTCAAAGAAGTTGCATATTCATATAGCATCTTGTCAGATCCTGAAAAAAGGAGGCAATATGATACTGCTGGTTTTGAGGCGTTAGAAAATGAAGGAATGGATATGGAGATTGATTTATCCAATCTTGGAACAGTGAACACGATGTTTGCAGCACTTTTTAGCAAGCTTGGTGTTCCTATCAAGACCACTGTATCTCCTACAGTTCTGGAAGAAGCTATGAATGGAACAGTTACAGTGAGACCACTCCCAATCGG…	gz_contig_2616	100	1343	gi|242083756|ref|XP_002442303.1|
aj_contig_713	GGGGTAGACGGTTTCCACGGTAAATCCAAATCCGTTGCTACAATATATCAGTCTTCTCTCAATGGGGAAAAAAAGGAAACAAACCAAATTATACGAGATTAGCACCAACCACAGGGCTTATTGGAAATATTTGACAACCCAGGCTAGGACAGAAGCTATTTATTATAGCTGTTCTTCGCTCTCTTCTTCATCACCATCTCATCTGATTATCGCCATTTTCACAAACTGAGATGTAGAAAGAAACCTTCTCCCACAACTCGCGTTCAGAGGATCATGCACGCATGCGGGTGTTCACAACCACGCGGCGTTCTTCAGAGGTGTGACGACGGCCTTGATCTGCAGGTAGTTCTTGAGGCTGTCGATGCCCTTCTCCCTCCCGATCCCGCTCATCTTGTACCC…	gz_contig_536	99.08	1307	gi|20530131|dbj|BAB92019.1|
aj_contig_714	ATAAGCGGTCCAAATGGAACTTGTAATCACGCAAGACAAAGGGGTCAACAGTACATGCATTCATGTATGTCCAGTTCAAGCAGAATCATAACCAAGATAACAACACGGACTACGAGCCTACTGACAGCAATCTGTTTCTTTACCTTTCATTCGTCTCCATCTATTCACAGGCCAGCTTTGTGTCAAAGCTGCTTAAGCAAATAGCGAATGCTTGGAAAGCCGAGAGAGGGTAGCGATAGTCCATGGTGAACATGTCCCTTGCCACTTTGCCAAACTGTAGAATGACCTTCTCAGGGTCCGAAGATGGAGCAGGCTGTGACGGAGTCGGAGCANNNNNNNNNNNNNNNNNNNNNNNNNNNNNNNNNNNNNNNNNNNNNNNNNNNNNNNNNNNNNNNNNNN…	gz_contig_8560	100	1202	gi|242055093|ref|XP_002456692.1|
aj_contig_716	CGTTATTACAGGGCAAAGCTACATATAAAGGTTATAAATAAAAGCAGCAAAAGCTACTACAGATTACCACACGGAAAAATGGTGCTGACACAATCAGAAGCAAAAGGTTGTACCGAATGTCGTTCCCCAGCTAAATCTGGGGGCACCCAGCACGCCTCATCACCATGGACGAGCAGGTCGACCATCTGTGCCTTAAACAACTAATAAGCACCAGCGCGNNNNNNNNNNNNNNNNNNNNNNNNNNNNNNNNNNNNNNNNNNNNNNNNNNNNNNNNNNNNNNNNNNNNNNNNNNNNNNNNNNNNNNNNNNNNNNNNNNNNNNNNNNNNNNNNNNNNNNNNNNNNNNNNNNNNNNNNNNNNNNNNNNNNNNNNNNNNNNNNNNNNNNNNNCACCGGTGGATC…	gz_contig_5183	99.37	1433	gi|157272093|gb|ABV26700.1|
aj_contig_718	TACCACCAGGAGACGCTCGAGAATCTCAAGCTCGCCATCAAGGCCACCAAGAAGCTCTGCGCCGTCATGCTCGACACCGTCGGTCCGGAGCTGCAGGTGGTGAACGCTGCCGAAACCACGATCTCCCTTGAAGAGAACGGCACTGTTGTCCTCACGCCTCACCAGGGGCAAGAGGCCACCAACAGCTTGCTGCCCATCAACTTCTCTGGGCTCGCAAAGGCTGTGAAACCAGGTGCCACGATATTCGTTGGTCAGTACTTGTTCACTGGCAGTGAGACTACTTCAGTTTGGTTGGAGGTTTCTGAAATTAAAGGAGATGATGTGGTTTGTGTGATCAAGAACACAGCTACCCTGGCTGGTTCACTGTTCACATTGCACTGCTCCCAGATTCATATCGAC…	gz_contig_7672	99.81	1610	gi|226502865|ref|NP_001149198.1|
aj_contig_719	GACGACGATCTGTCGGAGGAGGACCAGGCGCTCAAGGAGAAGCTCGAGCTGTACGTGGTGCGCGCGCAGGACTCCGATCCCGGCGTCCAGAAGTTGGCTCTGGAGAGCATGAGGCAGGAGATTCGTACAGCAACAAGTTCTATGACATCCGTTCCTAAGCCTCTCAAATTCCTTCGTCCACACTATGGAACACTGAAGTCTTACTTTGAGACAATGTCCAACCCCGATCTGAAGAAATATATGGCTGATATACTCTCGGTATTAGCATTGACGATGTCTGTTGAAGGCGAAAGGGAGAGTTTGAAGTATCGAATGATGGGATCTGAAGGGGACATTGGTTCATGGGGGCATGAGTATGTAAGAAATTTGGCTGGTGAAATTGCGCAGGAATTCCAAAGG…	gz_contig_1485	99.89	2747	gi|413926600|gb|AFW66532.1|
aj_contig_720	ACCCACAGTAGTAAAAAATTTAACCATCATAAAAGAATAAGTACGGCTAAGTTACACGCAGAATCCTTCTCGCAACAGAAGAAATGTTCTGTGCATCGGAATTGGAATCCACTCCTGGCTGGTGAGAAGAAAAGACAGTAAAAGTTTGCAATTACATGCCTATGTGCTTGTGGGAAACTTCTTTGCCTCCATCATCCTCATGTCTAGCTCTTCTAACAAGGCAGGCATTGCCTTCTCCATACTAATACACAAAAACACAAACTAGTCTATGCTCCTTTGACTTTACGTGACGGAGGTCGTCGGAATATGTTGATAAGATCATCAAGACCCCGTGTAGTGATCACCAAGAAACTGAAGAGGACGATAAGATAGGAACCAAGCACCAGAAGGAACAGCAGA…	gz_contig_5458	100	1697	gi|242080171|ref|XP_002444854.1|
aj_contig_721	CGCTCTCGGACACGTCGGGCTCATCCGCAGGCCTGAAGGTGAAGTCTGTCTCCGTGAGGAAGCCGTCGCTACGGGGGACAACTTCGACGACTCTTCGCTCCTCCGGCTGCATCACCGGCGGNNNNNNNNNNNNNNNNNNNNNNNNNNNNNNNNNNNNNNNNNNNNNNNNNNNNNNNNNNNNNNNNNNNNNNNNNNNNNNNNNNNNNNNNNNNNNNNNNNNNNNNNNNNNNNNNNNNNNNNNNNNNNNNNNNNNNNNNNNNNNNNNNNNNNNNNNNNNNNNNNNNNNNNNNNNNNNNNNNNNNNNNNNNNNNNNNNCGGCTCCCTGATGAACCCCCGGAAGTCGCGCTCCGTCAAGAACTGGTAGTTGTGTGTGGCCGCGACAACCTTCGACGGTGCTGC…	gz_contig_2842	100	497	gi|414885419|tpg|DAA61433.1|
aj_contig_723	TGCGATATCATCAACATGGATCCAGGACAAGCAAAAGATACACTTAAGCTCCTAAAGAAACGTCTTGGAAACAAGAATTCGAAAGTTCAAATTCTGACACTTTTTGTGCTAGAGACTCTAAGCAAAAATTGTGGAGATGTTGTTCATCAACAGATCATTGATCGTGACATATTAAGTGAAATGGTTAAGATAGTAAAGAAAAAGCCAGCCCTTAATGTCCGGGAGAAAATATTGAGTTTGATTGACACATGGCAAGTGGCTTTTGGAGGTCCCTCTGGAAAATATCCACAGTACCATGCTGCATACCAAGAACTCAGGTCTGCTGGTGTTGATTTTCCACCTCGTGAGGAAAATTCGGTTCCGCTGTTTACACCACCACAGACTCAACCACTAAGGCAT…	gz_contig_6868	100	1331	gi|242070435|ref|XP_002450494.1|
aj_contig_724	CGACCCCTGGCAGTCTGTTGTGTGCGCTGAATTCTAGCTTGCCTTTTTTCAAGGGCTCTCTGTTGTAGGTTGATAGTTGTAGAACGACTTTCAGCTCCATCAGCTATAGTACTACGCTGTTCAGATCCAACAGCTTGGCCTTGGTTCGGAGAAGGTTCTTGTTCCCCAGCTACTGTTCTGGTATTTTGCTGTTCCGACGATGCACTAGTTCGGGCTGGACTAGGGGAAGGTTCTCGTACAGGGGATACATCTGTGGTTCGGCTAGGTGATGCATCTGCCCCTACTGATGGTACTACTGGGCTTTGTTCTGATTCCACTGCACCACGTTCAGCAGTGCTGTCACCTTCCCCAATCTCTGACATATCAGTATCATTCTTTCCTGTTTGCTCTCCCGGAGAT…	gz_contig_4382	99.7	2030	gi|242062566|ref|XP_002452572.1|
aj_contig_725	TTTCACTTGGTCAAATTCTGCACTAAAGGGCACACCCCCCATATACAGGGTCTTTGCCCCAGTTCCTTCGCTTTGGGTGCTCATAGGTGTTTTAGGCTTTTTTGATGTTTTTTCAGCAAAATCAAGTTTCACTGATTGACCCATTAATTCTCTACCGTTAAACTTAATGGCCTTCTGGGCGGCTTCCACTGTACCAAAATCAACATAGCAAAAACGTTTACGTGTGCCATTTTCCTTGACAGGGAAACGAACATCAATAACCAATTCTTTCACTTGGTCAAATTC	gz_contig_16770	100	227	gi|413921104|gb|AFW61036.1|
aj_contig_726	CTTGCAGGCGCTGACTGCTGAGATGACCGCTTAGGTGTGCAACATCAACAGTGGCGAATACCCTGACTCAGCTGATACTGGACTACTGGAGTAGCATCAATGCATTGATGAACAGCAAATAAACGGCACCCACTGTTGTTTCTTTCCTTTGGACTTCTTCTCGGCTGGTAATCTTGCAGGTGAGTTCCAGTCTTGCTGCCCAGAACCAGCTTTGGGAGAGCCTGGCTTCACAGGTGACTCGTTATCTTTCGAGGAGGATCGGCGCCTGAATGACAGGACTCTGTCCTTGGTGCTCGGTTTCTTCTCTTTGGTCTCCACGTTCTTATCGGCAAGGAGGACCTTCAAGGAGACATGGCTCCTGTCCGAATCCACAATCACTTCCTTGTCAGCGACTTCTTC…	gz_contig_1920	100	2846	gi|242079899|ref|XP_002444718.1|
aj_contig_727	GGTGTAGTCGAGAGTGTGGGTGAAGGAGTGACTGAATTCCACGTTGGAGACCACGTGCTCACTGTCTTCATTGGGGAGTGCCAGAGCTGCAAGCACTGCGTTTCGGGGAAGAGCAATATGTGTCAGAAGCTCGGTTTGGAGAGGAAGGGCGTCATGCACAGTGACCAGAAGACTCGGTTTTCGATAAAGGGGAAACCAGTGTACCATTACTGTGCAGTGTCGAGTTTCAGCGAATACACGGTCGTTCATTCAGGATGTGCAGTGAAGGTTGGCCCGACTGTGCCAATGGACAGGGTGTGCCTTCTGAGCTGTGGCGTGTCTGCAGGACTTGGCGCAGCTTGGAATGTTGCTAATGTATCAAAGGGCTCGAGTGTAGTTATATTTGGTCTTGGAACTGTT…	gz_contig_10562	98.82	1019	gi|242062434|ref|XP_002452506.1|
aj_contig_728	TTGATCTTTCTTTCGCCACTACAAAGCAAAAATCATAGGTTTAGACAAAATCCAATGATCTGACAATTTTCAAAAGACTCAGCTCAACATCCAGAAACAGGCAGTAACCGACTCATCGAACACCCACATTGACAAGAACAAAAATAGGAACTAGTACTGCATAGGTAACGCTCAGCACAGGGGAGAGGCCGTGCTGTCTAGCACTTGATCTCCTTCAGCCCATGCGCGAAGTACAGGAAGGTCGGGTCCGTGGCTCCATCCTTGTAGTACGCGAACACCAGGCCTCCATCATCGTGCATGCTCTCACCAACAAAGAACTGAAGGTCCTTCAACTTGCCAAGAAGAAACTTGGTGGCACCCTCAATGTTCTTCTTGAAAGCATCAGCCTTCTCGGGCTCC…	gz_contig_7988	98.15	809	gi|192912976|gb|ACF06596.1|
aj_contig_729	CTCCTGCAAATCCATCGGCCATGGTCAAAAATTCGTATCAAACAGGTGTGATGCTTGGTAAGCTGTTTTAGTTCATTCGACATGGAGATCGGTTAACTCCATTCTGGTATACTATGTGAAACGTTGAAAAATGAAACAAGTTTCTCAGCTGTGCTGCGCAGCTTTTAAACGCACTCTGTTCTAATTCCGGCAAAGATCAAATTGTTTGCCTACTACACAGCACCTTACAGCAGCAAACTCTGTTACAACTGGGCATCCGTGTATACAGCCTTTTCACTGTGCCCCCTGTCCATTGCTTGCGTGACAATTAGGTACTGGTCCAAGCCAATTCCGCCTCAGTTGTCCCGCACTGATCTCAATCCTCCTGATACTCAGGGTTCTTTTTCAGGATCACGAAAT…	gz_contig_1476	99.56	2747	gi|218201939|gb|EEC84366.1|
aj_contig_730	GCGGATTCTGGATTCCCTGATGCTTCCCAAGAGCTTTTACTTGAGATCACTGCTTTTTCACAACCAGGTAAGTTGAGATTCTGGCTAGTGCCAGATGCAGTACCCGCAGATAAGCTCTGGCTGGCTGATAGCTGCCACCCTTGTACTCCAGTGCTCTCAGCTACTGATGATGCTGACACATGATTTGGTTTTGAGTTCACCTGCTCAGGAAGTACCCAGTCTATGGCAACACCTGAGATTGCCTGGTTCACATTTTCCTCCCCTAGCAGTAGTCCTCTTTGAAGGAACTCACTAATTCCAGACACAGCTACCTCGTTGATATCCAGAGTTTCAGTTGCCTCAGCTCCAAGATCAGATGAACGTTGAAGCGCAGAATTTGGTGAAAGCAATGACCACATA…	gz_contig_2214	99.61	3833	gi|413957175|gb|AFW89824.1|
aj_contig_732	CACAGCAGTATGAAGGATGTCCACTGCTTCAGCTTGAGATGATCCATCATTTCTTGAAGTCATGTGAAAACTGGCTGGATGAGTACCGGGATTACTTGGGCGGCATTGTTGCACAGCTACAGGAATTCTTCCCAGATGCTTCATTCATGGTATCCAATTTTTGGTATGGGGACAAGAGGAGCCGTATTTCAGACATATTATCTGAGTATGACATGACTGTAATGGACTATCCACAGCAGTATGAAGGATGTCCATTGCTTCAGCTTGAGATGATCCACCATTTCCTGAAATCATGTGAAAATTGGCTATCAGTGGAAGGACAGCAGAACATGCTTCTAATGCATTGTGAGAGAGGGGGATGGCCAGTGCTTGCATTTATGTTGGCTGGTCTCCTTTTGT…	gz_contig_5434	97.34	2258	gi|414590734|tpg|DAA41305.1|
aj_contig_733	GGCTTCTAGACCCTCGTCAGCGACGATGTGTACTGACTGGTTTGCATCACCTGGTGTTGAGTCTGTAAAATGTACGTTCTGAATATCAAGCTTGGAGAGTAATGCTAGCACCTGCTTCTCCTTCGATATGTAATCGAGGACATCTGCAGTAGCAACAATAGATGCTGATATTCGTTTCGCCGGCTCGACAGAATATTCGGCTCGGACGTTTCTGATTCCTCTTATCAATGACTGCAAATTCTGAAATCTTTTGATGGACCTCAAGTCCTTGGGAAGGTCTGTGGCGGGCCAGGGAGTAACCATAAGAGCCTGTTTTCTGTACGGAAATGCCTGCCATAATTCTTCAGTAACAAAGGGCATGAAGGGATGCAGTAGCTTCAATACGTTTTCAAACACGTA…	gz_contig_8719	100	941	gi|218199135|gb|EEC81562.1|
aj_contig_734	AGTAAATTCATAAAACATATATGCATAGTCATTTTTTAACAAATGAAGCCAAGATACTTGAAACAAGACACATACAACCACCATAACACAACTAATACAGCCTCTTCATTATTCACCAGCCAGGATACACAACCCTCTACAAAATGCAATAATACAACAGCGTAGTGAATAAAGGAAAACAGCACAATTACACAAGCATGTTTCTGAATACCAAACCTCCTCTGCAGCAACTCTACCGCTGCAAAATGATTAGCTCTCAAGCAAAGACCTTCTCATTCAGGCAGCTGCAACGGGCTCGGTTGCTGCTGCTGCTGCTGCAGCCGCAGCCTTTTCCATCTCAGGCACAGTTCCANNNNNNNNNNNNNNNNNNNNNNNNNNNNNNNNNNNNNNNNNNNNNNN…	gz_contig_7660	100	428	gi|242094318|ref|XP_002437649.1|
aj_contig_735	CTTATTTTACATACAGCTCCTGAGTATATTCACGCATGTCTTACAAATGATGTTCCTTTTTCTCAACTGCTAATCCATGGCTTAATTTTCACCTTCTTTCATGTCAGTATAAATAAAAGAAAAGAAAACACACAATATAATTATATCTAGCTTGGTCTTCTACACACATCCTCAGTACATGACCAATGCCGGAACTGGGACGCCCCAGCGGTCACAGGTGCATGTCTGGAACTTCCCTGGACCATTGTAGGGCGTCGTCGTTCTCTCGAGACTTGACTTGATTCCAGAATTGATTTCTTCATCGCGCTTGCCCAGCTGGTTGGTATTTAACAATCAGCGAGTGTCAAATACCTTTATTGTGCCTGTAGAAGTGAAACTTCTATCTCTTGCAAAGTCTTT…	gz_contig_3793	99.07	1610	gi|242061312|ref|XP_002451945.1|
aj_contig_736	ATGCAACTCAAAATTTACAGCCTCTGACGACTAGCTCTAACCTAATAAAAGATGTAACCAAAAATTGAGATCGTAATCTCAGCCATCTATAAGTCAGCCATACCGCAATTGATCATGCGATCTTCCTTTTCCTTCCCTACGGGGGAAAAAANNNNNNNNNNNNNNNNNNNNNNNNNNNNNNNNNNNNNNNNNNNNNNNNNNNNNNNNNNNNNNNNNNNNNNNNNNNNNNNNNNNNNNNNNNNNNNNNNNNNNNNNNNNNNNNNNNNNNNNNNNNNNNNNNNNNNNNNNNNNNNNNNNNNNNNNNNNNNNNNNNNNNNNNNNNNNNAAAAAAAAACTAAACTGGCGACAAAATCAGCGAGCCTAGATCACACGTCCCAATTTACTTTACACTGTACACAG…	gz_contig_3897	100	3905	gi|413946713|gb|AFW79362.1|
aj_contig_737	CTACTGATCCAGGGACTGATACGTGTATCACAGTGCATCTCGGAAACGGGATGCGCGACAAAATACGACATGTTCAGGCATAAAAGTCCAATAATCCGACCGTTTACAAAAGACTCAAAATCCAAAACAGGCAAACAAAAAGTAACAGACTGACAGCCGTAACACCACACATTGGCACGAACAAAAATAGGAACTACATAGGTAAGGTAACACCCAACACAGGGAAAGGCGACGTGAGCCTAGCACTTAATCTCCTTCAGCCCATGGGCAAAGTACAGGAAGGTCGGGTCAGTGGCTCCATCCTTGTAATAGGCGAAAACCAAGCCTCCATCATCATGCATACTCTCACCAACAAAGAACTGAAGGTCCTTGAGCTTGCCAAGAAGGAACTTGGTGGCA…	gz_contig_7991	100	671	gi|115486523|ref|NP_001068405.1|
aj_contig_738	CAGAGACCCTTTTCAGATACATCGCACCGGAGCAAGTTCCTGTCCAATTTGGTGGCCTCTACAAAGAGGATGACACTGAATTCTCCACTTCTGATGCTGTCACCGAGCTTACTGTGAAACCATCATCCAAAGAAACCATTGAGATTCCAGCCACAGAGAACTCCACTGTTGTGTGGGAGCTCCGTGTGCTTGGATGGGAGGTGAGCTACGGCGCTGAATTTACCCCTGATGCCGAGGGTGGCTACACCGTCATCGTCCAGAAGACGAGAAAGGTGCCTGCCAATGAGGAGCCAATCATGAAGGGTAGCTTCAAGGTCAGTGAGCCCGGCAAGCTTTTTCTCACCATCAACAACCCAGCATCCAAGAAGAAGAAGCTACTATACCGATTCAAGGTCAAGA…	gz_contig_4742	94.12	458	gi|242090629|ref|XP_002441147.1|
aj_contig_739	AAAGCTGGTTCTAACAGAACATGAGTACAATTCGAAGTTCACAACATTTTGTAATGATGCAACAAAGGAAACGACTATCATTTCAGCATTTGGCTCAAGCAACATAGCATCATGCTGAAGCGGACATTTTGACCAGAACATCACAACATGGAGCTAATCACTCACGCGGAAGGGTTTTACGTATGGTGGGAGTTTAGTAGGATAGCCAGACCAGAGCTGTTCTGCGTGGTCTCTCTCAGTAGTTTAGTATCTCAAGGAACTCCAGAGTTTCATAAGAAAATCTCTAGTATTCTTCAGCAGCACTGGCAGCGCTCAAGTCAACACTGAGATCAACAGCCTTTCCAGTGATTGCTGTGTACATGTTAAGAACATCTGCTACAGTTGTCTCAAAATGTGTTG…	gz_contig_6212	100	1658	gi|115463085|ref|NP_001055142.1|
aj_contig_740	TCCATACATCTCAGATTTTTCTTCACTCCCTCCCTCTCCTCACACAGCTCCCTGTCTCTCTCTCCCCTCCCAGCGACAAACTCATACAGCACAGACATCGGCAGGCTGCAATCGCGAACTGATCTCCTTCTCCAAGGACCCGCTAATTGTATGGCCGTCTTCTTCGTCATCCTCGCTGTGTGCATAGTTATTTCTGTAGCCTTGGTGTCATACGTCCACTACGCAAGCCGGCAGAGGAGCAAAGGCCGCCAAGGCGGCAGCGACAGCCATGATGAGCAAGCAGTAGGCTTAAAGCTGCCCCCTGGCTCCATGGGATGGCCTTACCTCGGCGAGACCCTTCAGCTCTACTCGCAGGACCCCAACGTCTTCTTCGCGTCCAAACAGAAGAGGTATGGCGAG…	gz_contig_12073	100	359	gi|414589665|tpg|DAA40236.1|
aj_contig_741	GCATGATAGACCGATGTTTTTATATGTTCACAACTCGGGTTAAATTCTTACATCACTGTTTTGGTCCTGACTGCTCTCTTCGATCCTGGAGCAGCAAGAAGATAAGACAGCACACAACATAAGCCAGATCTGAAAACTACACTGGTACGACAGGATCACAAAAAACAGGAAGAAAAAGAAACAAAAAAAAGGCAGATTATTCCAAGGATATCAGGTGGCTATGCAGCTTGGCAATGCCCTGAGGCATGCCAAGGCCACAATCCAGATCATGCTAAGCCTAACCTAACAAGCATCTACTGCATGAAACGGGAAGGTATCTAGCTTGATCTTCGCCCTTGTACCCTTGCAACGCCTTCCATGGAGGATGAGGTCCAGTGTGTCTGGGTTCTCACAGCTTGT…	gz_contig_1624	100	854	gi|242093614|ref|XP_002437297.1|
aj_contig_742	TAAGAAATCATAGATTATTTGTACAAAAAAGAAATGAGTAAACAATGCCATCGTCTGCTAATACCAGCCTAGTTCCTACTATACACAAATTGGGGTTTATCCGGTGAAAGTTTCTAATCCCTTGCTATAGTTACATGCATGATCGTGGGATGACCTCAGAGGATTCAATCAATGTCAGCATGCACGTAATCTACAAATACAAAATTCTTCTGGAGCTCATGAAATGCATACGCCGCAGCAGCGCTAACTATAGCAGCAGCACCTAACAATAATCTGAGCTGAAATTCTGCAGGAATCCCAGCCGTACCACAGCACACTACTGTCGCTCCCATGAATACCTTCTGCAGAGTCTGGAACGCATTGTATGCTCCTCTGCAAGACGAGCATTTCAGTGTATGC…	gz_contig_5954	100	1175	gi|242042229|ref|XP_002468509.1|
aj_contig_743	GCGTTCTCCAAAATTTCTCGGCCTCGCCCAGTTTATCGGATCCGTCGCCCTCCTCACGTGACCCCCGCTCGCCTCCTAGAAAAGGCTTGGTCGAGCAACGGACCCGGACACGGAGCCCCGCCTTATCGCCAGCCGTTCGAAGCAACTCCCCACCGCCCGATCATCGGGAGCCCGCCATGCCGGGGAGCAAGTGCGGCGCCGCGGAGNNNNNNNNNNNNNNNNNNNNNNNNNNNNNNNNNNNNNNNNNNNNNNNNNNNNNNNNNNNNNNNNNNNNNNNNNNNNNNNNNNNNNNNNNNNNNNNNNNNNNNNNNNNNNNNNNNNNNNNNNNNNNNNNNNNNNNNNNNNNNNNNNNNNNNNNNNNNNNNNNNNNNNNNNNNNNNNNNNNNNNNNNNNNNNNNN…	gz_contig_7236	100	2294	gi|242059255|ref|XP_002458773.1|
aj_contig_744	ATCCACGGAGGTGTACGTTACTTGGAAAAGGCAGTTTTCAATCTTGACTATGGTCAGCTCAAACTTGTCTTTCATGCTCTTAAGGAACGCAAGCAGGTTATCGAGAACGCTCCCCACTTATGTCATGCTTTGCCCTGCATGACTCCTTGCTTTAACTGGTTTGAGCTTGTATACTACTGGTTTGGATTGAAGTTTTATGATCTTGTTTCTGGAAGAAGACTACTGCATTTGTCACGGTATTATTCTTTAGATGAATCAGTTGAACTTTTCCCAACACTTGCAAAAAATCGCAATGATCGTAGCCTGAGAGGAACAGTGGTATACTATGATGGTCAAATGAATGACTCTCGGTTGAATGTGGGGGTGGCATGCACGGCTGCAGTTGTTGGGGCAGCTGTT…	gz_contig_12398	99.45	1631	gi|242075212|ref|XP_002447542.1|
aj_contig_745	CTTTGCGAGGGATCCAACCTACCATCCTGCTGCTCCATGTGCGTCAACAACAGGTTGATCGAGTACCATACGAAGTTGCGCATGATGAGGACCCTCCGCGACTCCCTCCACACCCGCATAGTTTCGCGCCTCGAGGCTCAGAGTAAAGCAGATGAACAGAGGACTTGGAGGGTGAGAAAAGCTCAAGATATCAAGGAGTTGCGGGACAGGCTCAGTGAATTGAAGAGAAAAACTGCTATTGAGAAGAGCAAGGTCGAGCAGGCATCGAGTGATCTCAAGGCACAAAAGGCATCATTGAATCTGGCTTTTGTTACGCTGAAAAAAAGACGAGGCGATGTGACAACGATGCATACTAATGCTGTGAAACTCGCACAGATTAATCTTATGGCAGCCACCTCA…	gz_contig_12076	100	1316	gi|242046368|ref|XP_002461055.1|
aj_contig_746	AGGAGTTCGGCTTCTTCCAGGTTAATTAATCAGTAGTGAAAACCCTCAACCAAATTAAGCGTCATTCGATGGGTAACTTGCACTGCTTGCTTCACCGTCCTCTGATCACCCGATCGATCCAGTATCCGTTCCCTGCTCCAGTTCTTCACCCATGGAGAACATGCTCCACTTGACCCCGGCCCAAGCGAAGCTCCCCAACTGTTTCGCTCTTGAGCCGGAACGGTTACCATCAGCGATCACCTCCCATGCTGTCACCCTCCCTGTCATAGACATGTCCCGCAGCCGCGAGGAGGTCCGTCAAGCTATGCTCGACGCCGGCAAGGAGTTCGGCTTCTTCCAGGTTGTCAACCATGGAGTCTCGGAGCAAGTGTTGAGGGAGATGGAGCTGACCTGCGAGGA…	gz_contig_258	98.79	992	gi|242083562|ref|XP_002442206.1|
aj_contig_747	AACAAGATGATGAGCCCATTCCTCACTCAGCGCACCAAGAGCAAGATCGTCTTCTGCAGCCCTGGGAAATCGGCAGAGACCCTTTTCAGATATATTGCCCCAGAGCAAGTTCCTGTCCAATTCGGTGGCCTCTACAAAGAGGACGACACAGAATTCTCCACATCTGATGCTGTCACTGAGCTCACTGTGAAACCATCATCCAAAGAAACCGTTGAGATTCCTGCCACAGAGAACTCCACGGTTGTGTGGGAGCTCCGCGTGCTTGGATGGGAGGTGAGCTACGACGCTGAATTTACCCCTGAAGCCGAGGGTGGCTACACCGTCATCGTGCAGAAGACGAGGAAGGTGCCCGCCAACGAGGAGCCGATCATGAAGGGTAGCTTCAAGGTTAGCGAGCCC…	gz_contig_4741	99.23	389	gi|242090629|ref|XP_002441147.1|
aj_contig_748	ATGGCACCGCACGAAGCTTCTCTCTACGGTGTGCGTGCACATGGCTCTCCACGAAGCTTCTCTCTATGGTGTACATCTCCATGACGCGCAGCACTTGTGGACGCCGCTGCCGACCTCGCCGAACTCGAGCACCTTTCATCTCGTCCTCCTCAGGATTGGTTATGCTTGGCCAGCCATCCTTTCCGCATACAAATCCACCTACATCAACGGTGTAGAAGTCAGATCTTGCAGGATGCAATCAAAAATTTTTGAGAAAAGAAAAGATCGATGGTAGGATTTTTTTTCGATGTCGCCGGCATGCGGAAGAAACGAGAGACGGAAGAAACGAGAGAGCTGGATGGTGGATTTTTTCTCGCGCG	gz_contig_12894	96.64	356	gi|297725909|ref|NP_001175318.1|
aj_contig_749	CGATTACAAAGACGCGCACTCCGCTAGTACAACATGCAGGTAAAAAACAGAAAAATTCCCTAGAAGGACAACGGGGCGCCCAACCAAACGTTACCAACATATAGCAGTATCTGGCGGTATTGAACTTTACAACTAGGGGCTGTTCCGTCACATCAGCCGCACGTTTTGTTTTCACCGAAAATTTCTTTTAATCAGATTCAGAAGCTCCGGTCCCAAAATACGGGCAGGAAACAAGGTTTCGTCGACATCAGTCAGAGTCTCACACCGTGTAGTTCTGCTGGATGGTGTCGATGTCCAGCCCCTTGAGCTTCACCACCGACTCGACGTGGCCCTTGAGGGTGTTAAGCTCCCTCAGCCTCGCGATCTCAGCTCGTCTCTTCGCCTGCTCCGCGATCTCCG…	gz_contig_299	99.1	1664	gi|346230721|gb|AEO22063.1|
aj_contig_750	CTCCGTTCACCCCGTCCATTTTTATTTGCGTTCAGTGCGTTTCTTGGTGCGTGTGTTGGGTTCTCTTCTTCCTTGGAAGGCTCCTTCCAGGGAACCCAGTAGCTCCTTCTCGCGGAGGAAGGCTTGAGGACCCAAGAAAAGGTCAGCGATGGGGGAAGCTGCCGGCGACCGTGTCCTGAGCCGCCTCCACAGCGTCAGGGAGCGCATCGGCGACTCCCTCTCCGCTCACCCCAATGAGCTCGTCGCTGTCTTCACCAGGCTGAAAAACCTTGGAAAGGGAATGCTGCAGCCCCACCAGATAATTGCTGAGTACAACAATGCGATTCCTGAGGCCGAGCGCGAGAAGCTGAAGGATGGCGCCTTTGAAGATGTCCTGAGGGCTGCACAGGAGGCTATTGT…	gz_contig_1035	100	1664	gi|459895|gb|AAA68209.1|
aj_contig_751	GCTAGGATCTTCTATTGAATGCAGAAATTTCAACCTAAAACCGGTACATTCATTGCTTCCTCAGGAACTGTAAAGACCAATTCTACTATCCAGACAGAAAAAGTTCTGATTCCCAGAGATACCGCAATTGATAGATAGTAGAAACAGGCTCAACGCTGAAAGTCATCAGTAGGTGCTTTCTTCCAAAACAAGATCGTCTTCTAAAAGGAGATCTTCCCTTCGTCTTTGCTCAGCTTTTCTCTTCTCATTTTTCTTCCTCGTCTCCTCACCGATAGCATTAGCGATAGCAATTGGCAACCAAAATCCAGGCCTTTCAAGAAACTGGGCTCGATGCAGGATCATCGCATCGCGTTCCGTCACATGAATTNNNNNNNNNNNNNNNNNNNNNNNNNNNNNNNN…	gz_contig_11311	97.98	740	gi|242067315|ref|XP_002448934.1|
aj_contig_753	CTCCGAATCGCATCGCGCTCCTCCGCCGCTCCGCTCCGCCGCAGATCTAGGGTTCTTCTGGAAGCTTCCGCGATGGCGGCCACGATCCAGTCCGTGAAGGCGCGCCAGATCTTCGACAGCCGCGGCAACCCCACCGTGGAGGTTGATGTGTGCTGCTCAGATGGTACATTTGCAAGGGCTGCTGTTCCTAGCGGTGCATCAACTGGTGTTTATGAAGCTCTGGAGTTGAGGGATGGTGGAGCTGACTACTTGGGCAAGGGAGTTTCAAAGGCCGTTAACAATGTGAACTCTATCATTGGGCCTGCTATTGTTGGCAAGGACCCTACCGCTCAGACTGAGATTGATAACTTCATGGTTCAGCAGCTTGATGGAACTAAAAATGAATGGGGATGGTGCAAG…	gz_contig_93	100	1676	gi|357145900|ref|XP_003573806.1|
aj_contig_755	CGGCGGTGGACCCGATGGAGTACAACGCGATGCTGAAGCAGAAGTTGGAGAAGGACCTTGCTGCCGTTGCCATGTGGAGGGCCTCTAGTGCGATGCCTCCAGAACGTTCTGCAGCTGCTCCATCCTTGCCAAATGTGGAGGTTTCACATGTGGGATCTCTTAATTCAATTGGAGGTAATGGGATTCTGGTTCAAAGTAAGCCAGCTGATCGCCCCAGTGGGGGATTAGGTCTGCAGGTGGTGCAAAATGTCGATGCTATTGTTAAGCAAGCTACTAGCTCTTCCTCTCGCGAGCAGTCCGATGATGACGACATGGAAGGAGAGGCTGAGACTACTGGAAATGGAAATCCAGTTCAACAAAGACTGCAGAGGAGGAAGCAATCCAACCGAGAATCAGCGA…	gz_contig_16786	100	560	gi|242032691|ref|XP_002463740.1|
aj_contig_758	GGGAGGATGCGGCCATTACAGTTGCAGGGATGATCGCCTTCTTCGCTGCACTTCCGGGGCTGGAGGATTTCATGCTGGACCTGCGGCATAATGTGCTGGAAGCAGCGCCAGCCATGGAGGCACTTGCACGCAGATGCCCACGGATCAAGTTTTTGTCGCTGGGATGCTTCCAGGGGTTGTGCAAGGCTTCATGGCTGCATCTTGACGGTGTTGCAGTGTGCGGAGCACTGGAGTCACTTTGCATTAAGAATTGTCAGGATCTCACCGATGCCAGCCTTGCGGCAATCGGTCGTGGCTGTGGNNNNNNNNNNNNNNNNNNNNNNNNNNNNNNNNNNNNNNNNNNNNNNNNNNNNNNNNNNNNNNNNNNNNNNNNNNNNNNNNNNNNNNNNNNNNNNNNNN…	gz_contig_7231	97.88	1130	gi|413953150|gb|AFW85799.1|
aj_contig_760	AAATTGCACTTTTTTTCCATGTGTCTCCGTAACTTACAGCACATCTTGTAAAGGCAAAGCATAACTTATTCACTCTCCCCTCAAATTATGGTTCCAAAGATTGAATCTATACTACAAGAAAGATGTGCTCACCAAAAAAAATAGCAGATTAGAAAAGGGAAAATAAATACAATGATATGTAAATGTAGAAAACTGGCATCATGTGTTGTGACTTAAAACACATTGGCGAGACCTGGTCAAACAGCTTCTCTATATCAATCCAATTTATCCTCTCGCCCATTCAAATCATGTGTGACCTTTTCATCACTTGGCAGATCACCATCCACCTTGGGCGTCTCTAATTCGGGCTCACTATCTCTTTTGGGTGTCTCAGCACCCTGTTCTGTTTTGGGTGTCTCC…	gz_contig_4118	100	2105	gi|242059155|ref|XP_002458723.1|
aj_contig_761	CATGAAACGCCCAAATTAATCATCAATTCGTAAATTAAACAGCCCTGCGCACTGCGCTGCAGCAGGTGCAGCCCCCCTAATCAAACCTACACAACATTACATTCAGTATCATCTCATCACGCTACTGCTAATGACACAATCAGAGTGGTGCTATGTACACAGACAAGGAACCTAGGATTGAGGAGATTAATTAACAAGGAGGCCCTAATCCCCAGGCGATCTGTCCGGGTTAATTAACAATCGAATCAGACCCGAGGTCAGAATGAGGCCTGGGGCCGCGGGAGGTGACGACGACGGGCGCATCAGCGAGGTGTCGTGACACCAACCCGAGCGCGGAAAACATCAGGATAATAATCAATCAAATCAAGCAATTAATCAACCAACCGGCCGGCCGGAGCC…	gz_contig_427	96.59	263	gi|414866591|tpg|DAA45148.1|
aj_contig_762	CCGGCCCGCTGCAACAGAGCTAGGGGGAACACATAGCCATGGCCTCTGTTCCGAAGCTCCTGCTGCTTACCCTCGTGTGCAGCTACCATTCTCTCGTCGCTCATGCAGGGGATGCTCGCAGCCACAAGGTTCTTTACTACGTTGATTCCATGAAGCCCAGCGCCGTCTGCTCCGAGTCCAAAGCTGTTCCGTCGTCCTCTAATGGCACGACGGTGCCGTTGCGCCACCGGCACGGCCCATGCTCCCCGGTGGGCTCCAAGGAGATGCCAACATTGGAGGAGATGCTCCAGCGCGACCAGCTCCGAGCTGGCTACATCCAACGCAAGTTATCCCGTGGTAACAAGGGCGGCGTCCAGCAATCGGACGCAACCGTGCCGACCACCCTGGGCAGCCCACTGA…	gz_contig_32598	100	335	gi|242066142|ref|XP_002454360.1|
aj_contig_763	CCGCGGCCCCGTCATCATCGACGGCATTGGTTCTACCTGGCGCAGACACAAAAGATGCCCACAGAGAAGGCGCTAGTAATGCCATTGTCCCTGCGCCACTTATGCTACCGAAAGCACCTGAGTCTACAATTCCAGGGAAAAACACGACTTTGTCAATTCCTGGATCATCAGACAGGTTCTCTACATCTGCATTGATGGAAAGGATACCAAGTAGGTGGCCACGGCCTGTATGGCATGCTCCTTGGAAGAACTATCGGGTCATCAGTGGTCACCTGGGATGGGTCCGATCTATCGCATTTGATCCAGGGAATGAATGGTTTTGTACTGGTTCCGCTGATAGGACAATAAAGATATGGGATCTTGCATCAGGAACCCTGAAGCTTACACTGACTGGCCATA…	gz_contig_2315	99.58	1421	gi|223943663|gb|ACN25915.1|
aj_contig_764	CCGTCGCCGGAGGAGCCGCAGCTGGCAATGCTTGCGCGTGAACAGACCTTCCCCGAACAGATGGACCGGCATAATCTGTGTGGATACTTCTGGAAGCAGTCAACTGCTGCTGAGGTGCCAAGTAGCCTTCCTTCCACACATGAGCGTAAGCTGATGAGTTTGGATGAGAGACGCAATCCAAATCCACATGTGGTCAGTAGTTCTAACAAGCGCAAGGCACAATCTGATGCGGCAGAGCAGAATTTTTACGCTAGCCGTTCAGTCCGGATTAAACCTGATATGGCTGTGCCTGTGAAGCGAGCTTACCACAGTCAGATTGATTTGGAGAAACCAGCAACATCGGATGATGTTTCGGAAATTGTTGTTCACTCTGGCTTTGGCAACCTTGCAAACCACATT…	gz_contig_3406	100	1409	gi|226495285|ref|NP_001145422.1|
aj_contig_765	CGTCGCCGTCAAGGTGGTCGACTTCGAGCGCACCAACAGCGACCTGAACAATATCATGCGCGAAGCTCAGACGATGATTCTTATAGACCATCCCAATGTTGTCAAGGCGCACTGTTCATTTGCAAAGGACCAAACGCTGTGGGTGGTCATGCCGTACATGGCTGGTGGGNNNNNNNNNNNNNNNNNNNNNNNNNNNNNNNNNNNNNNNNNNNNNNNNNNNNNNNNNNNNNNNNNNNNNNNNNNNNNNNNNNNNNNNNNNNNNNNNNNNNNNNNNNNNNNNNNNNNNNNNNNNNNNNNNNNNNNNNNNNNNNNNNNGCTGGTGGGTCGTGTCTTCACATAATGAAATCTATCTGTCCTGATGGTTTCGAGGAAGCCATCATTGCCACGGTGCTTCGTGAA…	gz_contig_10338	100	680	gi|357143351|ref|XP_003572890.1|
aj_contig_766	GCGTGCTTGCTGGGCAAGAAAAGGTACATGAGATTCTAAGCAAACTTGAAGGCGTTTCTTCGCATGTTAATAAAGTTTCAACGCCAGAAGTCCATAAGGTAATTGATGCACTTCAAACAAGTTGCGCTGACCTTCACAGATCAGCGGAGGATCCACTTTCTGCTGCAAAGGCAGCTGCAGATGCGGTGTTGGCTGCAAGGATGGATAAGGCACATAATCTAAATGCTGCAAGTGTAAATGGTCAGCAGGCAACTTGTGGCACAGCAGGCCCAAGTTCCCATAATGATGTAGACAAAGCTCCTAATAAAGGAGCGCCCAGCCTTATGGATTGGAACCCGACAGCACAGACCTATCAGTGGGAGGATTCTCCTGATACTGAGAGGCCACAGTTCCGTAGAC…	gz_contig_15270	100	446	gi|242048846|ref|XP_002462167.1|
aj_contig_770	GGGTATAATAAAGTAAATAGTGTAATTAACAGCAGCACTGATAAAACGACAATTGAACTCCAACATAAGTACAGAATGGCAAGTGGGCTCCGAATAGTAAAACTGCAGCAGTAATGGCTACTTGCATAAAATACTTAAGATCCGTTTGGAACGTAGGAATTTTACAAGAATCGGTTCAATTTTACATGAAAAAATGTAGAAATAAAAAAATATTCTTTATNNNNNNNNNNNNNNNNNNNNNNNNNNNNNNNNNNNNNNNNNNNNNNNNNNNNNNNNNNNNNNNNNNNNNNNNNNNNNNNNNNNNNNNNNNNNNNNNNNNNNNNNNNNNNNNNNNNNNNNNNNNNNNNNNNNNNNNNNNNNNNNNNNNNNNCGGGGTCTTAAATGATAATTTTTGCAAGC…	gz_contig_21775	100	242	#N/A
aj_contig_772	CCGGAGTACCCGACGAGGAAGCATGAGTCGTCACCCGAGCACTAAGTGGGCGCAGAGGTCCGACAAGGTGTACCTGACGATCGAGCTGCCTGATGCCAAGGATGTGAAGCTGAACTTGAAGCCAGAGGGCCATTTCAACTTCTCGGCTAAGGGTGCCGATGACTTGCCTTACGAGCTTGACCTTGAGCTATTTGATGCCGTGAATGTGGAGGAAAGCCAGGCAGCTGTGGCACCAAGGACCATATGCTACCTTATCAAGAAGGCTGAGAGCAAGTGGTGGCCGAGGCTGCTGAAAAAGGAGGGCAAGCCACCTGTGTTCTTGAAGGTTGACTGGGACAAATGGCAGGATGAGGAAGATGAGGACATTGGACTTGATGACTTTGGTGGTATGGACTTCTC…	gz_contig_3030	99.41	509	gi|242035611|ref|XP_002465200.1|
aj_contig_773	AGCAGCTGCGCGCTCTGCGAGGGATCCAACCTGCGCTCCTGCTGCGCCATGTGCGTCAACGGAAGGTTGATCGAGTACCACACGAAGCTGAGCATGATGAGGGACCAGCGGGACTCCCTCCGCTCAGGCCTAGCTGCGCGCCTCGAGGCCCAGAGTAAAGCAGATGAACAGAGGACTTGGAGAGTGAGAAAAGCTCAGGATATCAAGGAGTTGAGGGACAAGCTCAGTGAATTGAAGAGAAAAACTGCTAGGGAGAAGACCAAGGTCGAGCAGGCATCGAGTAATCTCAAGGCACAAAATGCGTCATTAAATTTGGCTTTTGTTACGCTGAAAAAAAGGCGAGGTGATGTAATGAAGATGCACACCAATGCCATGAAACTCGCACAAATGAATCTTATG…	gz_contig_12216	99.26	1217	gi|242046368|ref|XP_002461055.1|
aj_contig_774	ACACAGCGCGAGCGCTTCTTCCTCCCGTTGCACGAGCCTGCACTGCAGCTCTCTTTCTTTGCCTTCGCTTTCCTTTCGTGGCGCGCCACCATGTGTGGGATCCTCGCCGTGCTGGGCTGCGCCGACTGGTCGCAGGTGACGAGGGCTCGCGTCCTCACCTGCTCCCGCAGGCTGAAGCACCGGGGCCCGGACTGGTCGGGCCTGTACCAGCACGAGGGCAACTTCCTCGCGCAGCAGCGGCTCGCCGTCGTCTNNNNNNNNNNNNNNNNNNNNNNNNNNNNNNNNNNNNNNNNNNNNNNNNNNNNNNNNNNNNNNNNNNNNNNNNNNNNNNNNNGCTCGCCGTCGTCTCGCCGCTGTCCGGCGACCAGCCGCTCTTCAACGCGGACCGCACCGTCGTCG…	gz_contig_988	100	929	gi|357112720|ref|XP_003558155.1|
aj_contig_776	CGCATCCAAAGAGGAGGTCATGCTTGCGCATGCCCAATCAGGTTCGTACATGCTTTGTCCATTGCAACGCACCTCTATAACCACAGCTATAGCTATCAGGGCACATTACTCGAACGGAATCGAACCTCCAGAAGTGAGTCGGTACATTATACATATGTTTAAATAAGAAAGGTGTGTCCTGTTTCCATCGGGAAATGATCAACCTGAACAGGCAAGAACTTTTTCCTGCCTGGATGCAAATACATGTTGAAGCAAGCTCCGGTATGTAAAGCTCGAAGGTGAGGTAAAAGCGCAAAAGATCTGTACAGCTTCAGCTTCTGAAATGTTGTTGCAGATAATTAATCAAGTCAGGAATGAGGAGCAGCATGAACATGGCACCGAGGATGGCCTAGGATGCCT…	gz_contig_7199	99.24	1568	gi|242070873|ref|XP_002450713.1|
aj_contig_777	AACTTGTGCTCGTTGTTCTCAGTTTCGCTGTAGAGAAGCTCCTCAATCTCTGGGTGGAGGGACGTCAGCCTCTTGTGTGACTCGGTATACGGGAAGTAGATGGACATGTCAGCGCCAGGTGAGACAATGTTGAACTTCGGGTCAAAGACATCGATACCATGGACAACACGGTACAGACCAGGCATTGTGAATGCCATGTGGGACTCATACTGACCAACAGTGTCCTTGTTTCCAGCAATCTCTTGGAAGGTACTGGTGATGATGAAGTCAGCATGGTTCATAGCAATCAAGTCAGTGGTGAACTGGCATGAGAAATGGTAGTGATCCTCAAACTTCTTCCAGTAGAGGTCAGAGTTCGGGTACTTTGTTTTCTCAAGCGCATGGGCAATGGTACAATGA…	gz_contig_1177	100	1556	gi|459895|gb|AAA68209.1|
aj_contig_778	GCGGCTGTAGGATCCCCACCTCGTTCCGGATCCGGCGAGAAAGAGTAACTGACTTTGAAACTCCTGAAAGATGGGCCGTGGTGTTAGCAGTGGCGGTGGTCAGAGTTCCTTGGGCTACCTCTTTGGTGGTGATGAAGCTCCAGCTGATAAGCCTGTACCTGCCCAAAAGCCAACACCTCCGCCCACTGTGGATAATAAACTAAAAGATATTCCAGCTGGTATTGAAAGTAGCAAAGCAAGCGTGAGAATGGAAGGCCAGAATGGAAATTTTCTTACGGATCGTCCTTCAACCAAGGTGCAAGCTGCTCCAGGAGGTGGTTCTTCACTTCACTATCTTTTCAGTGACGGCAAGGATGGCAAGTGATGCTCATAGCTGTTAAGTTCATCATGAGCTTGGTT…	gz_contig_3536	100	680	gi|115488676|ref|NP_001066825.1|
aj_contig_779	AGTTCGAGTGAGAAAATTATTATCACAATATCACATTTTTTGAATTGTATGAATGTATTTTATGGAAATTAATGGCCCAAAAAAACTAAGCTTTGAAGGACACGTTTCATCCATAAAGGAAAGCATTTGAAGCTGGATGGAACCAGATATTCCCTTTCTGCCCCACTTCTGCCAATTAACATAAAGCAACTCTTAAATTTTATACAGAATTCTTAACCCATCTAATTCTGAAGTGGTGATTCAGATCTGCCTCACTCTTCGGTGACGTATCTTGGGTACTGTACGGGATATGTCTTCTTCATGCTCTTCTGAGAATACTGGTACAGTACGTGTCCATCAACATCATAAAAGATGAAATCTGCATGGTCCTGGTGGAGCTGGAGGGACATGAACCCTTGC…	gz_contig_6520	99.43	1046	gi|115451799|ref|NP_001049500.1|
aj_contig_780	CAGATCGCCAAGCGCCAGGCCGTCGTCAACCCCGAGAACACCTTCTTCTCCGTCAAGCGGTTCATTGGGCGCAAGATGGCCGAGGTCGACGACGAGGCCAAGCAGGTCTCGTACAGTGTCGTGCGCGATGACAACGGGAACGTCAAGCTCGACTGCCCAGCCATTGGGAAGCAGTTTGCCGCAGAGGAGATTTCTGCGCAGGTTTTAAGGAAGTTGGTGGATGACGCCTCCAAGTTCCTGAATGAGAAAATTACAAAAGCAGTGGTCACAGTTCCAGCATATTTCAACGATTCGCAAAGAACAGCAACAAAAGATGCTGGCCGTATTGCGGGACTTGAGGTTCTCCGTATTATAAATGAACCAACTGCTGCATCACTGGCCTATGGTTTTGAGAAGAAA…	gz_contig_7369	99.77	1277	gi|115487998|ref|NP_001066486.1|
aj_contig_781	TGCCACGTAGATACAATAGGAGCATTTATAATAGCACCACCAGGGTTAAGATACAATAAATAACATGTTCAAAGCTAAACCATCATCAAAACATACTGAAGTCATGGGCAATAAACACAGTTTGTGAAAGAAAATGAAAATGGTTTTAAGCTTTTGTACCTCATAACTAATAATCTAGATCCCTCTCTTTTCAGAAGCAGTTGCTCTCTAGTATTACAGAGGATCCTCAGCCCCTTTTGCATTAGATTGCTTCAATGCATAGCAAAGACAGTGTCATTTCGTCTTGGAGGTCTATCAGGAATTGAGCCTGGCTTGAACTTAGATGCTTCATGTCTTGCAAGTTCAGGTGGCACAGGACTGTTGCTCTGTATAAGCATCTGTTTCAGATCAAAGAAAATA…	gz_contig_5823	100	1568	gi|242033243|ref|XP_002464016.1|
aj_contig_782	AGCATGACTTATACAGAACAAAAAGCATTTCTGCGATGTGAAACTGAAGGCATATTTTATTGTCTGAATGCTTCAAGTCAAATTCATGACAACCAGCACAATCTGCGCTAGTAGTAGTAATCCATTTCAGTATGGGTATAGTTTGTGCAACAGCACGTCAAAAGTTTATTCCAAGGAATTCTAGTGCTCCATTGTCCAGCCACACAGCTCCAACACTCCACTATTGTTGGCACGCAGAGATACCGCCTTTAGTCTGTCTTGAATCTGTGAGCAAATTTATCCAGACCCTCTTTGCAGTCTTCTATTACCCTCTTCGACTTGTCCCCAATTGTTGAACCAAATGTGCAAGCACTGCCCTGTACTTCTGCTGCTATCTTGTTTGCCTTTGAAGCAGCAGCA…	gz_contig_4788	99.78	2666	gi|242037313|ref|XP_002466051.1|
aj_contig_783	CAGTCGACCTGCTGTCTGGCATCCAAAGCATTAGGAACAGCCAAATGGTGGCAAAATATTATGGACCATGGACACAAGAATGTAATGAAATGGGCATGAGACACAGTAACGGAAGCAAGCCTCAGAGTTAAAATTGCTTGCACCCCGTCAAAAAAAAANNNNNNNNNNNNNNNNNNNNNNNNNNNNNNNNNNNNNNNNNNNNNNNNNNNNNNNNNNNNNNNNNNNNNNNNNNNNNNNNNNNNNNNNNNNNNNNNNNNNNNNNNNNNNNNNNNNNNNNNNNNNNNNNNNNNNNNNCCCCCGTCAAAAAAAAAATAACCATGCCATCAAGAAATCAGAAGAACAACAGCCTGTATCTAAGCTTGTCAGCACCATCGCTTTGCAATCTCCTCGTCAAGGACT…	gz_contig_4744	99.9	2888	gi|242066918|ref|XP_002454748.1|
aj_contig_784	TCGAGCCTGTGGAGGAATAGGAGACAGGAGTTCAGTGTGCTTGCAGCTTGAGTCTAGTGCTACGACCTACGATCCCATAGCGAACTCCTGGGCTTCGTGGGTTTATCTTCCCCAGCATAGAAGCAGACTAACGTGAAAGCTGCTTGTAGCTTTATATGATATGAAAGTGTTGGCTTTATCTACTGCAACGAGGCCACTCTTTTACAAATATTAGGACCCATAGGAACACTCCAGGAATGTCACAGTTTCACCCGACACAGCATGCGGGTGATAATGATTTCCAGATGTGGCAACAGCAGATGTTGTACAAGCAACTGCAGGAGATTCAGAGACAACAGCAACTTCAGCAGCCTGATCATGGGGCCAGGATGCAGCCCTCCTTTGGACAGTTCCATGCTC…	gz_contig_3862	99.81	4667	gi|414865505|tpg|DAA44062.1|
aj_contig_785	CTTTCGTGATTGCCCCCCACCGCCGCATCGCATTCTCCGATCCCAAGCTCTCCCATCGCAGCCATGGCGAAGAACTACCCGTCCGTGAGCGCAGAGTACCAGGAGGCCGTCGAGAAGGCCAGGCAGAAGCTCCGCGCCCTCATCGCGGAGAAGAACTGCGCCCCGTTCATGCTCCGCCTCGCGTGGCACTCCGCGGGGACGTTCGACGTGTCCACCAAGACCGGGGGTCCCTTCGGCACGATGAAGAACCCGGCGGAGCTGGCGCACGGCGCCAACGCGGGGCTGGACATCGCGGTGAGGATGCTCGAGCCCATCAAGGAGGAGTTCCCCATCCTCTCCTACGCCGACTTCTACCAGCTTGCGGGAGTCGTGGCCGTGGAGGTGACTGGCGGGCCTCAG…	gz_contig_169	99.2	752	gi|145388991|gb|ABP65326.1|
aj_contig_786	CCCCATTTCAACCCATCCAAATTAGATCTCAAACAGGAACCAATTTGTTGGAACTGGTTCCAACCCAACCCATTCCCAGGTTTAACCACAACTCGACGTGTCCCCTTTGCTCATCACAGCCACTGATCCCAACCCCAAGGAGGCCAGTCGGTTGCTCACCAGAGGCCACCCTCAACAGAGCATACGACAGTCCATAGAATGCATCAGGTAACGCCATCACGCAACTTGACACCACAACCTCCCAAGCCAAACTACATCCAGGAACAGGGCCAAACAATAGCAGGATATTTCACGCATGGCAGCATGAGTCATGCAGAAGTCACTAGAACGTACTGCACTCAGTATGATGGATCCAGCAGTTTAGTGAGCATACAGCACCCAAGTTCAGCCAAACGGACA…	gz_contig_51	100	1256	gi|145388991|gb|ABP65326.1|
aj_contig_787	CTCAAATTAACCCCCTGTAATTTGGGAATAAGTAAAAGGAGAAACACAAGTCATCTTGATGTGAACGCACTAGAACTACATGTCTACATCTCAATAGATGTATATTCTACAATTAGCAACCAATACCTCCATGGCTTTCCCTTGCCACAAAACAAGGTAAGCATCAATTTATGACCTGATTTTGCTGATAACCTCACACGAACTGAAACCCACCACACTACTCATGAACCTCGAGAGTGGCCCTGAGTATCAAACTTCTGTAGATGCATAGCTGCAAAAGAACTCACTTTGCAGCTGAACTAGTGGCTGATGGCACTTTTGTGCCACGGCCTGTACCAGAGTGATCAACCCGCTGGTAACTAACAGCACCACCACCACGTGATGCGCCACCTCTGCCCC…	gz_contig_4300	100	851	gi|242075372|ref|XP_002447622.1|
aj_contig_788	TTTTTTTCAATTCTGCAGAGGGACGCAATCCATGCTGCATCGCAGTTTGCTGCCAGAAATCAGTTACCTACATACATAAGGGATGAGATGCTTTCTCATATCTGCTTAAGGTACAAGACAGAGGGCCTGAAACAGAAGGAAACTTTGGATAGTCTCCCCAAGGGAATTCGATCAAGCATAGCATACCACTTATTCTTCCCAGTCATTGAAAAAGTCTACCTTTTCTCAGGTGTTTCCTTTACCTGCATGCTCCAACTGGTATGAAAAACAAGACTGACTTTCTATGCTAGAGCAATTGAAGCGTGTATAAAATTTTTTAAAAAAATAGCAAGATCACTGAAAGCTAAGCGTGTACTTCCTTTGTAGGTCACTGCAATGGAAGCAGAGTACTTTCCACCA…	gz_contig_12455	100	671	gi|414875750|tpg|DAA52881.1|
aj_contig_789	AGAGATTCCAAGATAATCTTCCATTCATTGACCATTAATGTCGATTACATGATTCTAGCAAAAGGGAACCAACGCCAATTAGTTTGTCGACATTCAACAATGCAAGCCCTCTGACAACGAATTGTGAAGGTCATAATATCCAACACAAGCAACAGATGACAGCAAACTGGGTATTAACAATGTTCAAGTCTTGCACCAAAAGAATGAGCATCTTCTGCATGACAATATAGCTGCCCAAAGGCATAGTCACGTCACAGCAAGATGAACTCACATGTTTCCATTTTGAACTTCCAAAAAGATGAGCTCAACTTCATGTGTCAGTATCTTTGAGCATGACGAGACATTTATCCAGGTCTCTGAATGAGAAACAAAGTAGCTATCTGCCCACATGCGAGAACG…	gz_contig_4566	99.15	1412	gi|242054285|ref|XP_002456288.1|
aj_contig_790	TGAGGATTATGAAGAACCTGGTGGTGAGAATCACTTACTGGGGTTTATGTTTGGCAACGTAGATGATTCTGGTGACTTAGATGCTGATTATCTTGATGAGGATGCAAAGGAACATCTTTTTGCACTGGCAAACAAGCTTGGTCCATCCCTCAAAGACATTGATCTAATCAAGTCTTCTCCAGCACCAACTGATCCTTCCGAGCAAGACTATGATGAGAAGGCAGAGGATGCTGTTGACTATGAAGATATCGATGAAGAATATGATGGACCTGAAGTTGAAGCCACTACAGAGGAAGACAATGTGTTAAGTAAAAAGGATTACTTCTCTTCAGCTGCAGCATATGCACCGGTCAGTACTGCAGTTTCTGTTTTTGACGATGAGGACTACGATGAGGATGA…	gz_contig_10462	100	2108	gi|242096508|ref|XP_002438744.1|
aj_contig_791	CACGGTGCCTTCAGCTCCATTTCACGGACCAAGGCAGCCAAACACACCTGAGCACCTGACTCCTTTTGCTTATTCTAATCGCAGTATCATCCACCCCCACTTGGTAACAGTTTATGCCAAAAGCGACCGCTTTGCATGCTGTTCGCAACTATAAAACGGCAGTACGTAACGCGACAAAGAACACTGACCGAATCCCTTCACCGATCACGTCTCTGGAAAAGTATACGATGGGGACGATTTGCTTGCTTTTAGGATGATGAGTTTTTTAGGACCCACTCCACCAATGTGGACACGCCGAACCCGGTAGCCTCACGCTTCTTGTCGTTCCACACCGGCCCTGCCATGTCGATGTGCATCCACTGGACCTTCTCGTCCACGAACTGCTTCAGGAACAGGGCA…	gz_contig_2743	100	1373	gi|242066822|ref|XP_002454700.1|
aj_contig_792	CAGCGGCAGGTGGTGCTGATGGTGGTCGTTTTGGTGCTCGCCCTGGACAGGGGGCAGCTGCACAGTATGGAGGGCCATACGCTTCGGTTTATGGCACACAACAGGTTGGTGGACTTAGTGGTAAAGGGCCAACTTCTTCTAATCTTCCTAGCTTGCCAACTCGCCCAACTCCACTCAGTGAGTCATCAAAGTTCTCGTCTGCACCCGTGGGGTCTAGCCTCGCAAGGCCAAATGATGACTATCTGGCTGTGCGTGGATATGCACAGAAGGTAGATCAGTATGGCACTGATTATAACTTGGAGAGAAGGATATACGGTGAACACTCCACAAATCTTGGTAGGAGAGACAGCCTTTCTGATTTGGACAGAAGATACCCAGATCATATTCCTGCAGGCCATC…	gz_contig_145	99.79	1439	gi|413943845|gb|AFW76494.1|
aj_contig_793	GATAATTAGACGTCTGTACGGCGGAATGGAAAACAGCACACTGCGAGCACGGCATATTGCAACATACAATGGGGTAGTACCATCCCACTTTTCATCTATAACTAGACAACCATTTACATTTCTTTGGGGTTACAAATTACGCAGCGCTCAGTCACTCACTGCAGAATGCGAAGTTCCAAGGTGGCTCAGACCTACTCAGAACTTGCCCTCAATGAATCCAGCCAGACCATTGATTTTTAAAAACTTCTTGATCACAAGGGCCACAATTGCAAGAGTCAACCCAAATGCAGCCAAGGTCAATAACCTGTCATGCTTTGGCTTCTGGGTCGCAGTAGCAGGAGCGTGTGGCGCCGCTGGGACTCCTGGAGTGTTCTCTCTAAGTCTCATTTCAGGCATGTG…	gz_contig_1046	98.48	791	gi|414866466|tpg|DAA45023.1|
aj_contig_794	TTCTGCCTGTTTCAATTTCGTTAATGTTACATATACACGGACCCCAAAAAAATGCATCATAGAACTGCCAAACAAGATAGTTACAATCACAATGACTCTACAGCACATCTTCTTCCCCCAATCACATTCCCAAACCCGAGCCCTGCATCAGGGACTAACCACAATCTTTTAGGAATCACGTCTCAACATGAACCCTTCTTTTTTTGCCGGAAAAGGGAGTGAACTGATCAAGGACCTCTTGCATTCTTCAGCCGCTTCTCTTCTAACTGTGAAGCTTCGTTCAACATGTCGATAGCATCGCTCTGCATGTCTAGCTTTGAAAGGGCAACGGCTTGCATGTAGAACGCGGTTGGCCAGTCAGGGTATACGCATTGCGCTTGCATTGCATCACGGAGGGCG…	gz_contig_7906	100	1235	gi|238010110|gb|ACR36090.1|
aj_contig_795	CGGATGGAGCGGGAGGCCGTCATCCCCATCATCAAGCCCAAGCTCGTCATGCGCCTCGCCTACCTCATCGAGCATGAAGCCGACCGCACCGAGTTCTTGAAGCTGTGCAAGAAGGTTGAGTACACCATCAGGGCCTGGTACCAGCTCCAGTTCGAGGACCTTATGCAACTGTACTCCCTGTTTGATCCTGTGTCCGGTGAGAAGAGGCTGGAGCAGCAGAGCCTGACGCCGGAGGAAATCGAGACCCTCGAGTTCAATTTCATGACATATCTCTTCCAGGTAATGGAAAAGAGCAACTTCAAATTGTTATCTGATGAAGAGTATGATGTTGCACAATCTGGAAAATATCTGTTGAATCTTCCCATCAAAGTTGATGAATCTAAGCTAGACACGAAATTG…	gz_contig_3830	100	1664	gi|242083402|ref|XP_002442126.1|
aj_contig_796	GTTTCAGTTCAGCAAATTTACATCTGTCCACTATCATTATCGTACAAAAAATACAAGAAACTCATCCAGTGGCACACGTTCCCTCAGAAAAACTATCTGCCCCGAAAATGCACTCAGAGCTCATTTACATGCAAACGGTAGCTCAGGCAACTGCAGTATTATACCACACAGGTGGATCATTCCTGGTATACAATAGGTGGCGCAGAGTGCCTTAACTACCCAAAAAATGGTAACCCAGGTAATCACGCNNNNNNNNNNNNNNNNNNNNNNNNNNNNNNNNNNNNNNNNNNNNNNNNNNNNNNNNNNNNNNNNNNNNNNNNNNNNNNNNNNNNNNNNNNNGTAATCACGCTGCCGGTATGCAATAGGAGGTGCTGAGTGCCGGAGGAAGGACGCACACCA…	gz_contig_3686	100	3593	gi|242085820|ref|XP_002443335.1|
aj_contig_797	CCGCCGGTACCATCGACAACCCGTTCCTCCGGCCGCCACCGTTCGAGAGAGAGAGAGAGAGAGAGAAGGGACACCGGAGAAAGACCCCTGCTTTGTTCATCGGAGGCTGCGGCGAGGATGTCGGGTGCCGGCGAGGAGGACAAGAAGCCGGCGGACGCTGGCGTCCACATCAATCTCAAGGTCAAGGGACAGGATGGCAACGAGGTGTTCTTCCGCATCAAGAGATCCACACAGCTGAAGAAGTTGATGAACGCCTATTGCGACCGCCAGTCTGTTGATATGAATGCTATTGCGTTCCTGTTTGACGGCCGTAGGCTCCGTGGCGAGCAGACCCCTGACGAGCTTGAGATGGAAGACGGCGACGAGATCGACGCCATGCTTCACCAGACGGGAGGCTTC…	gz_contig_7747	99.53	641	gi|226505642|ref|NP_001148325.1|
aj_contig_798	CAAAACCAGTAATCATCACAATCTCCATGAACAGTAGTAGTACACCCGGGAGGACAGCTGCGATGATCAGCAAAGCACGCATCAAAGAGCTAAAAACATATTAGTAGCCCATCATTGGGAGTACAACCGATACAGGATAAATATATTATTATGTGATAGATAACCGAGTCACGACAGACCAAAGTACCAAATCTCACTGCTAAACAAGGCTACGCATGTCCTTCAGCAATGGCTCACGGAGCCAGAGCTTCACAAGTTCATTAGTTTGTTGTTTTTACGTCCATGTTCAAGGCTGCGCAAAACGAGGCTGCGACGGCTGCTTCTAAGCACAATTAGGCGGCAGAAAGCCTCCGGTCTGGTGAAGCATGGCGTCGATCTCGTCGCCGTCTTCCATCTCGA…	gz_contig_7901	99.57	701	gi|219870186|gb|ACL50298.1|
aj_contig_799	CGGCGGCGCAGGGAGGCTCCACGGGGACGTCGGTGCTGTCCATGCTCAAGTATGCCGTGCTGCCCATCGCCAAGGTGTTCACCGTCTGCTTCATGGGTTTCCTCATGGCCTCCAAGTACATCAATATTCTCCAGCCCAATAGCCGCAAGCTTCTCAACGGGCTTGTCTTCTCGCTTCTGCTTCCTTGCCTTATATTTTCACAGTTGGGTAGAGCAATCACAGTTGAGAAGATGATACAATGGTGGTATATTCCAGTAAATATTGTTGTAGGTTCAGTGTCTGGATCTTTAATTGGTTTTGTTGTGGCGTCTATCATCCGACCCCCTTATCCTTACTTCAAATTCACTATTATCCATATCGGAATAGGAAATATTGGAAATATACCTCTGGTACTTATTG…	gz_contig_542	100	1748	gi|242054781|ref|XP_002456536.1|
aj_contig_800	AGTACACGTGTACACATTAACTTAGCATAACAAACAACTTCATGACTCGTCAACTATAATAATATCCAGAGACTCCTCTTCAAACTGACTGCATAATCAAGCTTCAGTCTGTTCCCTCAGGCGACGGATCGTACTTCTGACAGTGACTGCACTTGCAGTGTTCATGGTGTAGGCACCACCGGCCTTAACCTTCCCACAGTCCTTGCATCCCCAGATACCAACAGCTTTCCTCTTCACAGCAAACTTGCCACAGAACTCGCAGAAGTATTTGGAGTGCTGAGAGACCTCCATCTTCTTGATCTGCTTACGCAGACTGGCACCATATCTGGTACCATACTTGCCAACGATTCCGGC	gz_contig_11735	96.58	350	gi|115439177|ref|NP_001043868.1|
aj_contig_801	TCCTCCTCGCATCCGCCGCCGCCGCCGCCTCGTCCTAGCCGGCAAGATGACGAAGCGCACGAAGAAGGCCGGTATCGTTGGCAAGTATGGTACCAGGTATGGTGCCAGTCTGCGTAAGCAGATCAAGAAGATGGAGGTCTCTCAGCACTCCAAGTACTTCTGTGAGTTCTGTGGCAAGTTTGCTGTGAAGAGGAAGGCTGTTGGTATCTGGGGATGCAAGGACTGTGGGAAGGTTAAGGCCGGTGGTGCCTACACCATGAACACTGCTAGTGCAGTCACTGTCAGAAGTACAATACGTCGCCTGAGGGAGCAGACTGAAGCTTGATTATGCAGTCAGTTTTAAGAGTCTCTGGACATTGTAGTTCATATGAGTCATGAAGTTGTTGTTTTGCATTTTTA…	gz_contig_13342	98.25	512	gi|115439177|ref|NP_001043868.1|
aj_contig_802	CCGCCCGTACTGATCTCCGACGAATCCACGTCTCCGCCTCGCTTCGCCGCTGCTTCTCAAGGCGAAGTATATCATGGCGTCAGGTCAAATTTTCTCAAAAACTACCCAAGCGCTGTTCTACAATTACAAGCAACTTCCTATCCAACGGATGCTTGATTTTGATTTCCTCTGTGGGAGAGAAACACCTTCTGTTGCCGGAATTATCAACCCTGGTTCTGACGGGTTTCAGAAACTTTTCTTCGGACAAGAGGAAATTGCTATTCCAGTTCATCCAACAATTGAAGCTGCCTGCAATGCACACCCAACTGCTGATGTTTTTATCAACTTTGCATCTTTCCGGAGTGCTGCTGCCTCTTCAATGTCAGCTTTGAAGCAGCCAACAATAAGAGTTGTAGCAAT…	gz_contig_613	99.24	1973	gi|115436118|ref|NP_001042817.1|
aj_contig_803	ACCTTACGTGGGAGTGGCAGCGGGGTCTCCGAAGCTACCTCCATCCCTTCATCTTTGTTGCTCTTTACAAGATCCTGGCTCTGCTCCACCTGGATACACCTTGGTTTATGGTGATGGCCCCGCGTCTCCTTCAATCTGTATTTGCATCTGCTGGAGATCTATACTTGTATAGGCTTTCCAAACTAATTTTCAATGGTCAGGTTGCGCAGTGGACATTATTTTGCCAGCTGGTCAACTGGTTCATGTTTTTCTGTATTACACGGACTCTATCGAACAGCTTGGAAACAGTTTTAACTATTGCTGGTCTCTATTACTGGTTTACTGCAATGGAGTCTTCAAAGGGAACCTCAGTTGGCAACCAAAAGGTTCAATCAAGAAAACTGGCTCTAATCATAGCAG…	gz_contig_17804	99.75	1193	gi|212724094|ref|NP_001131169.1|
aj_contig_804	GTTCGGACGGTCTCGTCAGGGGCTCGTCGCTCAAGGGTAGCAATAATCTTAACTTCCGGAGCAAGCCATGGATTGGGCAGACATTGGCATGGGAAAACAAGATCCGTCATTCAAGGCACTTGAACAAGGTCTTTTGCGTGTCTGTTCAACAGACAAGCAAAAGCAAAGTTTCTGTCAAACCTGTTGAATTAGAAAATGCAAAGGAGCCACCGCTCAACTTATACAAACCGAAGGAGCCTTACACAGCCACAATTGTCTCCGTTGAGAGGCTCGTAGGACCTAAAGCTCCTGGTGAAACTTGCCACATTGTTATTGACCATGGTGGCAATGTTCCATACTGGGAAGGGCAGAGTTATGGTGTTATTCCTCCAGGAGAGAATCCGAAGAAACCTGGATCCC…	gz_contig_3719	100	1034	gi|242047412|ref|XP_002461452.1|
aj_contig_807	AATGCTGCTTGTTCTGAAGCGGCTCTCTGTCTTCGAAGCAGCTCGACTTCCTTTTCCAACGTATCCAAACCTTGAAGTTTTTGCCGTAATTCCGCAACATCGACCTCGAGTTTGAAACATCTTGACTGCTCAGCAGCAAGTTGGCCACGGACAGCTTGAAGTTCCTTTGTCAGTTCTGCATTTCTGGTCTCTGCTTGAGTAATTTCTTCTTTAAGCTGTACAGTTTGCAGCTGTTCCCTATTAAGGGTTGCTTCTAATTCCTCTTTCTCAGCTTTAAGAGCTTCTAAAAGCTTTTCACTTGATTCATCATTTCTGTTCTGCTGGATCAGGTCTGAATCAGCACTGTCCATGGCAATCTCTCGTATCTTTCCATCTTGAGAACTTTCAACCTCAGGTTCC…	gz_contig_1506	99.35	1844	gi|242032345|ref|XP_002463567.1|
aj_contig_808	TGGTTCTGCCCCGCCATAGCGCCTCGCCGCCGCCGCCGATTAGATCAGCCTGCCAACGAATCTGTTGAAGGGGAAGAGGGGAAATCACACGCTGCGTTGTTGGATCGGGAGTTCGGGACACGGCGCTGTTTTGATGGAGATGAGAGATGCTGCCAGGTCGAGTTGATCGGGACGCGCTAGAAGGGAGAGGGGGCAAAAATGGATTAGTTTGTTAGCAAAAAAA	gz_contig_19338	97.92	143	gi|195434953|ref|XP_002065466.1|
aj_contig_809	GAAAAAAAAAATCTCTATGCTCGCCAACTTGACACCGTTTTGCTCGTTCACACCAGCTATCTAACCATGGTCCGATCAACAATGGTCTTGGATGGCAGTCGTTGACAACCAAAACAATTCAACAGAAACAAAAAATGAATGGGAAAAAAAAATAGTTCCCAGAGGTCATCTTTTGTTGGCAAATGCTGCCAATGCGTTCGCATGAGCAGGTGGCAGAGCACCCAGTATAGGCTGCATTTGCTGACCGTAAACGGATACCAAATGAGAAATTGCCTTGCCAATATATGTTTTCACTTCCTCACTCTCGTCTGGGGAAACTACCACTTGAGCAAATACATGCACCACATCAGGCACAAGGCTAAGGATCTGGGGATGTGATGACAACAACAAATTGCAGAC…	gz_contig_4768	99.68	1892	gi|242036247|ref|XP_002465518.1|
aj_contig_810	GGCTTGACCTGAGTAGTAGGCTCCTCTTCCTCCTCCTCCGCAGCTGAAGCCGCAGCCTCATCGGCCGTCTCCATCTTGACGCTCCCCTTCGTCATTGCCTGCTGCTCCTCCGCTTTGATGGCCTCCCCTGTCTTGCCGATCGGGGAGAACCTGGCCCTGATTAGGGAGAGCAGCAGCAGGGAGCCGAGCATGAAGGCTATGAGCGCCACATTC	gz_contig_14342	100	131	gi|308080400|ref|NP_001183454.1|
aj_contig_811	CACGGGATTGTACTGAATTCATGAAGCTGTCACTATTCCACCTTTCCCAAGTACCATGAAATTGAAGGCAGATCATGGAAACATAATTTCACGAGAAAAATGAGCACATATTCAGTACACCGGCAAGTTCTGGAGTGCTGAAAGTGTAAGCAATGGACGCAGAGCTACACCAGGAGAGGATTCAAAATCATCAACTTGCTCATGCACATGCTGTGTTTTTTGTTTCCACCAAACTAACCAGACGAAGTCAAACTTCGCTGAGGATATCAGTTCCCACGTACCACTTCACGCGCTTCAGAATATTCATGCCAGCTTCTTTTTCTTTTTAGGCCTTCTTTTGCGTCGTGGTTTACAGGCATCAGAATTTGAACTCAGATTGCTGTTATGATCTCCAGGATG…	gz_contig_5557	100	1109	gi|218193908|gb|EEC76335.1|
aj_contig_812	CCTTCTTTTGCGTCGTGGTTTACGGGCATCAGAATTTGAACTCAGATTGCCGTTATGATCTCCAAGATGATTTGTTACTCTTCTATTTTTGAATGAGTCGTCACTTGTGCTATTTGAAGTATTGCTTGAGCTCGATATCACGTGTTTATCCATAGGTCTAGCTCTATTTGGTGCTAATGAGCGAGGTGGTGGCATAAGAACTCGGGCATCTCTCTGATGCTGAGTCTTTTCATCACTTGATTGACCAGATGCTGCCCTACCTGAAGCACTGGAAGTGGGTTCTTTAGCACTTCTGTCAGTCCACTCATCATCAGCCTCTTCATCACTTGAACTTCCAGACATAAAGAAGTCATCGTCACTCACATCCATGGCATCATCATCACTCGCTGTCTCTTCTTG…	gz_contig_5574	99.57	698	gi|218193908|gb|EEC76335.1|
aj_contig_814	TCAATTGAAGACAAAGTCAGCAACTACTTACTGTTGAGTCTTCTTGGCATTTGTGCCAATATGAACTCTGGCAATGCTGAGCAGTCGAACGGTCAGGAGTTGCTATCCAATCTCTTGAGGAACCTAGGGGCTGTTGCTAAATCATTGGAGCCAAAAGAACTCAGTAAACTTCTGGAGGCATGCCAAAACCTGCAAAATGGATCAAACGCTGGAACCTCTGGAACAGCTAATGCTTTGGCAAATAATTCTGCTGCAGAGGCTGCAGGGCCATCTAACTCTAAGCCGCTTTTCATAAATGGTAGTCAATGTGGACAGGCATCGTCATCTGCTATGCCAGTACAATCAAAAGCTACCATGGGGGCAAATCCTGAAGCTAGAGCATGCAAGGTTAAGGATTTT…	gz_contig_8853	98.8	1997	gi|242037529|ref|XP_002466159.1|
aj_contig_815	CCGGCAGGCGCCGCTGCTGCAGAGGCCGACGGCGGTGCCGGACTTAAGGCAGTCTGTGAAGCTCAAGTACGTGAAACTGGGGTACCACCACTTGGTGACCCACGGCGCGTACCTTCTGCTGGCGCCGCTGCCGGGGCTGGTGGCGGCGCACCTCTCCACGTTCACGCTCCGGGACCTGGCCGACCTGTGGCGGAGCCTGCAGTACAACCTGGTGTCGGTGGTGGTCTGCTCCACGCTGCTGGTCGTCGTGACCACGGCCTACGTCCTCACGCGGCCGCGGCCCGTGTACCTCGTCGACT	gz_contig_17754	94.2	206	gi|125553417|gb|EAY99126.1|
aj_contig_816	CGTTCCTGCACTTCCCACCTCTCGGCTCAGCCGCAGAGAGCGAGAGAGGCTAGCCCTAGAGCGTGAAGGGCAGGCAACGAGGGGACTTCGCGATGACGGCGCCGGCGGACAAGGGGAAGAAGGCCAAGACTGACGCCGACGGCGGCGAGGAGAACGAGCAGATCGACGGCGCCCTCGTCCTCTCGATCGAGAAGCTCCAGGAGGTCCAGGACGAGCTGGAGAAGGTAAATGAGGAAGCAAGTGAGAAGGTTATGGAGGTGGAGCAGAAATACAGTGAGATTCGCAGACCCGTCTATGCTCGGAGGGGTGATATCATTAAAACAATCCCTGACTTCTGGCTGACAGCGTTTCTCAGCCATCCTCTTCTTAGCGAGCTTTTGACTGAAGATGATCAAAAGA…	gz_contig_3109	99.6	755	gi|162459465|ref|NP_001105066.1|
aj_contig_817	GCGAAATTTCCAATTTAATGAAGACCTCTCCGAAGGCCCAACATAACCAGAGCAGTAGACGAGATGCTCTCGATCTCTTATTTACATGTACACATAGTGTTTTAGCTGTGTTGCAATTCTCATTCAGCAATTGATGCGAGTAAACACTCCGGAAGTCTATGCAGTGATCTCAACAGCTAACACGATAACCCGTTTTTTCCATATGACACCTACTTCTGCAGATAGATACATGTCAACCCTCTGGAGAGAAGTTCAGATCAAGGACTGCAGATGTAGCTGGTATTTACCACCGGATTACCCAAAATTGATTCCTTGTGCCAGAGGCAACTCACTTCCATAGTTGATTGTACAAGTCGCCCTCCTCATGTACTGCTTCCAGGAATCACTTCCTGCTTCTCG…	gz_contig_5731	100	1373	gi|224031057|gb|ACN34604.1|
aj_contig_818	AAGATTTTGACAAGCCAGCCAATATCCAAATAATAAGGTGAAAACATTTCGATTCAAAGTTTGGCTAGGTACATAGACCTGACAAAATATGAAACACAACCTCAACCAACCATCAGGGTATAACCAAGAGTTTTAACTGACAGAATTCAGTACAAAAAAGTTATTCTCAGAACTCAGAAGAGGCCCTCTACACTCTTCTCTAGGGGCAAACAGCTCCCCATTATCCTCAGCTCATTTAGTTGGTGCTGCGCATGTGGCGGATCAGGTCGACCACGCGGGAGCTGTATCCCCACTCGTTGTCGTACCAGGACACAAGCTTGACAAACTTGTCGTTTAAAGCAATTCCAGCCTTGGCATCGAAGATGCTGGACCTGTTGTCACCCTGGAAGTCAGTGGAAA…	gz_contig_4396	100	788	gi|413937638|gb|AFW72189.1|
aj_contig_819	GAGCCCCCCAAGGACTACGTCCATGTCAGGGCGAGGAGAGGGCAGGCTACTGACAGCCACAGCCTCGCAGAGAGGGTCAGAAGAGAAAGGATCAGCCAGAGGATGAAGGTTCTCCAGGACTTGGTGCCGGGATGCAACAAGGTGATTGGCAAGGCACTCATGCTTGATGAGATCATAAACTACGTACAATCACTGCAACGGCAAGTCGAGTTCCTGTCCATGAAGCTTGCAACTATGAATCCACTTGACTTCAGCAACCTGCCTAATCTCCTACAGAAAGATATGTTCCAAGCCTGTGGCCCTTCAGCGAGTTCAGTCTTTTCACTGGAAAGTTCCAGCTCAGGGTTTCCGTTCAGCGATCAAGGAGATGTTTTCCAATCGTTTGTTTCAAACGGCATG…	gz_contig_4845	98.26	863	gi|218201482|gb|EEC83909.1|
aj_contig_820	TCAATTGAAGACAAAGTCAGCAATTACTTATTGTTGAGTCTCCTTGGTATTTGTGCCAATTTGATCTCTGGCGGTACCGAGAATTCGAATGGTCAGGAGTTGCTATCCAATCTCTTGAAGAACCTAGGGTCTGTTGCTAAATCACTGGAGCTAAAAGAACTCAGCAAACTGCTGGAGGCATGTCAAAGCCTGCAAAATGGATCAAACGCTGGAACCTCAGGAACAGCTAATGCTTTGGCAAATAATTCTGCAGCAGAGGCTGCAGGGCCATCAAACTCTAATCTGCTTTTCATGAATGGTAGTCAGTGTGGGCAGGCATCGTCATCTGCTATTCCAGTACAACAAAAAGCTACCATGGTGGCAAATCCTGAACCTAGAGCATGCAAGATTAAGGATTTT…	gz_contig_8960	100	2096	gi|242037529|ref|XP_002466159.1|
aj_contig_822	ATCCCTCAAATGCACATGGAGAAAAACTATGTTGATATGCCTTATAGGGATTCCACATACAGAGACTCACATAATAACCATGTTCCAAATTTCCAAAGACCTCTTCTAAGGAAGCAGGTAATGTCGAGGGCCTCTGCAAGTGGCAGACACAGCTTTGATGATAGCCATGTTCCATCAGGTGATGTGTCTGGTTATGCAGATTCTCTGGCCACTCTAAACGATGCGCTTTCTGAGGGTCTCAGCCCTAGTTCTGATTGGGTAGCAAGAGTTTCAGCTTTTGATTTCATTCGGAATCTGCTGCAACAAGGTCCAAGAGGTATTCAAGAAATTACACAAAATTTTGAAAAGATCATGAAGCTATTTTTCCGTCACTTGGATGATCCTCATCACAAGGTTGCA…	gz_contig_6032	99.87	2273	gi|414586455|tpg|DAA37026.1|
aj_contig_823	TGAAGCTGATTAAAACACTGATCATTAATTTACTTTTAACAGAAGATTACATGGGGGAAATTCACCAATGGTGGGTGAATTATAAACTGGTAATAAGGTACCACTAGTACAAAATATGCTGTGCGGGATGATTTTAACAAAAATGGGGCAGTAATCAACAAGTGGGTTGAAATCTACTATATCCTGGACAAGTCGATGCATCATGATATGCATATGCGACAAAGATGCGAAAACATCAACCTAAATAAAGCATGCTTGGGAATCACCGAAATCAAGCGGCCATCGCCGCTGCCGCTGGAAGGAGATCCGGCCACCTTCCGTCTCCGTCGTCGTCACAACCAGCTGCCATTCTTCACCTCCACACCCCCTTACGCACAGACAGCACGCAAACTACCACCA…	gz_contig_4642	99.6	749	gi|407232616|gb|AFT82650.1|
aj_contig_824	CTCTGTAAAAAAATCCAGATATCTATCACTGTGCAAAGCATTAGGAATAGACTACAGTTACAGGACAAGGTCAATAAAAAAGGCAGCCCGATGCATGTTGCTGCTGCTTGCACAGGGATGGGGGAAGGGTCCAATCATATTAGGACTTTTGTACATAGACTTTCCCTGTATTTCTGCAAGAGACTGTTTCCTACTTGAACCTCCAGAAGCTCCCAGTAGAAGGGAGCCACTTGTTCATACTATACACATACACAATCAACTAAAAATCAGCTTACCAAATCATATGGATAACAAATAATAACAATGTTACATCTCATTGGTTAGAATCAATTGGTTTGCCAGACCTTGCCTGTGAAATCCGGTTAGCGTAGATAGTTACTAGGCGCAATTGTGTGCTGC…	gz_contig_903	100	2468	gi|414586455|tpg|DAA37026.1|
aj_contig_825	CCGCGGATGCTGCGGCAAGGGTTCTGAAGGCATCAAGATTCTGATATAGTTGCTGAATACCTCATTCCCTCAATTCAGAATGACTCCTGTGATTCATTGTTCTGTTGGCAATATCAGCCTGCTTCACCTTGGCAGTTTCAGGACCAGCCGGGAAATCCAACTAAGAAGATACAACGGTTCGGCAAGGTATTCAAGAGTAGTATCACCATCATATCGAAGATTGCTGCGACCACAAACAGCATTTCACTTGATCAGTATTTACAAAAGAAGAAGCTGGTCCTCGACCCAGAGGTCAAGAACCTTGTCAGCAGCAACTGTAGGGACTGATGTAACCGTGGAGGATCAGAATACATCTCCTTCAGAAGAAGCTTCTGACGACAACTCTGAGGCTGCACCTGG…	gz_contig_1420	100	1340	gi|242046826|ref|XP_002461159.1|
aj_contig_827	CACTTCCTGACGCTGCTGCTGGTCCCGGTGATGGCGGCGACGGCGCTGGAGCTGGCGCGGATGGGACCGGAGGAGCTGCTCTCGCTGTGGCGGTCGCTGGACCTGGACCTGATCCACATCCTCTGCTCCGCGTTCCTCGTCGTCTTCGTCGCCACCGTCTACTTCATGTCGCGCCCGCGGCCCGTGTACCTCGTCGACTACGCCTGCTACAAGCCGCCGGCCAGCTGCCGCGTGCCCTTCGCCACCTTCATGGAGCACACGCGCCTCATCAGCGACGACGAGAAGAGCGTGCGCTTCCAGACCAGGATCCTCGAGCGCTCCGGGCTCGGCGAGGACACGTGCCTCCCGCCCGCCAACCACTACATCCCGCCCAACCCCAGCATGGAGGCGTCGCGCGCC…	gz_contig_4458	100	755	gi|194707682|gb|ACF87925.1|
aj_contig_829	GCGCTTCTCTTTATATTTAACTTCATCATTGTGCGACAACATACAACAACTTCTCCCTCTTTCCTTCAGCAGAATCATCTTGGCTCAAGTTCGGTTATTGAAACCTCGTTCTGCGACATGGGTGATCTGCTTGCGGACTGCGAGGCTCGGTAGATATCTGAGTACATGTCCGAGTTTACACCGTCCTTCCGGATGCAAAACACCGGCTTGGATGGAGTACTGAGAGTCACCGTGTTGCTGCTGAGCATGACGTTCACCGTCGACATCATCGGCCTATCCATGGGGTCGTCCTGAACGCACAGGAGGCCGATTTGGATGCACTTCACCATCTGGTCTCGTGGAGAGAGGCTGCTCAAGGATGGATCCATGATCTCCATTAGTGTTCCTGTCGTCCAGTGC…	gz_contig_21030	100	800	gi|414886974|tpg|DAA62988.1|
aj_contig_830	CACCTTCTTTCTTCCCTACTAAACTTGCATTCCTTGTACACGAGCTAACAAACACAACAGATCCCTTTGTACAATAAAAATTCCCCACTTTTTACAGCTCATCATATCATGAACACTAGTTGACCTGGACATGAAGCCATGGCCACCCATCTCTACACTCTTGCCTTCAAGCAGACACCATGCTGTCGGTCATCTAGGCAGGCGATTCAGCACAACAGGTTTCACGAATTCTTCAGACGATCCAGATGTTCAAGATCATAGATCCAAGCATATCTTTCAGGTTTGGGATTGACTTATGTTGATTCATGACCGTCCTAGATTGTCAACTCTGTCGATCACATCAAGAGCTTTTGTCCGATCGATCTCAAAGTCAATCACGGGAAGTAGCCTCCTGATTGA…	gz_contig_1456	100	1910	gi|238009192|gb|ACR35631.1|
aj_contig_831	CCGCCGGAGCTCTGCTTTATTAGATGCATAAAACAAGAAGTCATAGTAAAATCACTGAAGCTACCATTGTCATATAACAAGAGGCCTACGTACAGTATTTTAAACAATGTGTACATATCACCAATGCCATTCTACTGTGTATAAAAGAAGCGTCCCCAGTCTCCACATCGGGATACAGATAGCACAAAGTACACTAAATAAACCAGGAAAAATAGCGTGCAAAACAAGCAGATTGCAGCCTTCCCATAATAATGTGTGCCTGCGTCATCTAAAAAATTGTTGCTCAACGATTTACAGCTTCTAATCAACCAAGATCTTCACCCCCTAGAAAGTATCTGTTCCACCAGGAGCTTCCTTCCAGTGGTCCACGTTTGCACAAAAATGCCAACGATAAATATA…	gz_contig_1245	99.29	2543	gi|414887138|tpg|DAA63152.1|
aj_contig_832	ACTCTTGTTTAATACCAGCAGTACGCAAGAGTTAGCATTGGACTCTTACCTTGTGCTGGGGAGAAAAGGAAACACTCTGGCTTCTAATGTGTTTAAAATTAGTTCTCTGATGGCATATGACTAATCATCTTTTCGTTGCTAAATGTCCTTGTGCTTGCGCCCTTTCCGCAGTTGAAGTTGGTACATTGCTGCCTCATTCTAACTGTTTACTCTGACTGCTTGTTGAATATGTGTCTCTAAACCCCAGACCTTAAGCCACTGTTGCCTAGCTGTCTCCTCCATATAACTGCTGCATCACTTGCTTTAAAACTGCTGTTTCCTTCCATTATTGTCATCCAGCTGTGGATGTTGATAGTTTGTCATAATTGTTTTGCAGGACAAGCCTGAGCCTCCACCGGA…	gz_contig_162	100	653	gi|162457709|ref|NP_001105500.1|
aj_contig_834	ACACGATTAATAAATTGGCATTACAACAAAGACAATGAGCTGCAGGGTTCATCGCATGAACGTGCACCCCCGAACAAGCAGTTCGATGGTTGGATGCTATTCAATGCAGCAAGTTAGGGTCGCAACCAAGTATATATAGCCGCAGTGTGCACTCCATTTGCTGTACACTATTTGTACATCATATGCAGCTATGACAAGACTAGGAGCAAAATTAGAGAGGACTAACGAGTCACTACTTGGCACTACGCCGTCAATCATTTACAGTATCGCTCAAATGCTTCTTCGGTACCGAGATTTTGGGGAAGCAGATCATTTGCCGTCATTAAGCGCTTTTGGTCCAGACGAATGAGAATCTCAACTGCTTGGCCAGACTAGAGGAATCAATTGCTGCTGATAGGT…	gz_contig_501	99.7	2018	gi|242033275|ref|XP_002464032.1|
aj_contig_835	GCTGATCGACGCCGACAACCTCTCCGCGCACCTTGTTGAGATCTCGGGATCGTACGAGAACCAGCAGGATATTCAGCTCATGAGGTTTGCTGACTACTTTGGCCGAGCGTTTGTAACTGTCAGCACATCACAGTTCCCGTGGGCGAAGATGTTCAAGGAATCACCAGTATCCAAGATGGTTGATATTCCGCTGTGCAATATTCCCGAGCCAGTTGTCAAGACAGCAAGTGATTGGATCAGTCAAAAATCTTCTGAAGTCCTGGGGGATTTCATTCTGTGGTGCATAGACAGCATTATGTCTGAGTTGTCAGGTCCAGCTGCAGGAACTAAGGGTTCAAAGAAGGCTGTCCCACAGTCTCCACGGGCTCAGGTTGCAATATTTGTTGTTCTTGCCATGGC…	gz_contig_7744	99.57	1397	gi|414876518|tpg|DAA53649.1|
aj_contig_836	CTCCATCAGTACAACACTCCTACAAAACATCATCAATAAAAACAAGCCCCTCTAGAAGAATTATACCCTGAACAGTTTGCATCTGTATGTATCTAATTTTAGTACTAGCAGTTTCGACAGACAAACATGAACATTTTACCTAACAAGCAATAGCCAAAGCAAAACTCCATGTGAGCGAATTAAGCATCTGCAGTGGAAGCAGGCTCCGGTCCTATGCAGGGAGAAGTACTTGCCGATATCTCTTTCTTCTTGTTTTTTCTCATGGGGCTCTTCAACTTACTCGTCCTGCTATCTGCTTGAGAAACAATCTTTGAAATTGTGAAACCAGCTTCCTCAAATATGGTTGCTCTATCATGGAGGAGGGAGGTCCTCGAAACAACATCAACACCATCATATGTC…	gz_contig_22122	100	869	gi|242044516|ref|XP_002460129.1|
aj_contig_837	CGTTCTTTAATTGATGTCGTCATTGACTTTTAAATTCAACTTTGACTACTCGTTTTATTCAATTTTTTTTATAAATTTCATATATTTTGATATAATGTGATTTATCATTAGAGTTATTTGAAGCACAACTTGAAATTTTATATATTAGAGCAAATTTTTTGAATAAAACGAATGGTCAAAGTTGATTGTAAAAGTCAACGGCGACATCAATTTAAGAATGGAGGGAGTAGCAGATAATTTATACTGTAAATGTATGTTTAGAGTTGTGTTAAGAACATGGTGTATTCATCTCAAAACAGGACATGGAGTGCTTATTTTTTGAAAAGGCATGGAGTGTTTATTTTAATAAGGTGATTGNNNNNNNNNNNNNAGGTTTTACTTAGTTTCTTAGTAGTTCAT…	gz_contig_4972	100	1562	gi|242054949|ref|XP_002456620.1|
aj_contig_838	TCTGCTTCCGCTGACTTCTCAGCATAAATTTTGGAGGTGATATACACAGTTCAGGGCTAGCAGTTATACTGCAAGTTCATACAAGTTGGTTTTAGTTATACCGGTTGCATGCAAGCGATAATTGGCATATTACATGATAGAAGTAAAGTATGGGATGCTCTTACTGGTGATGTACTTCCTCATCAGCGCCAGCAAAGACGCAAATCCAATGCTTCGTAATGGTGAGACTGGTGACTGGATTGGGACGTTTCAAGGTCATAAAGGTGCTGTTTGGAGCTGCTGTCTTGACAAAAATGCTCTGCGTGCAGCATCTGCTTCCGCTGACTTCTCAGCTAAAGTATGGGATGCTCTTACTGGTGATGAGCTACATTCATTTGAACACAGGCACATTGTCCGAGC…	gz_contig_9089	99.73	1121	gi|242096290|ref|XP_002438635.1|
aj_contig_839	CACACCTCCACTTCACTCCCAGCTGCCCGCCAGCCCCGCCCAGCCCTGTGCCTGCGGAAGGAAAGGAAAGGAAAGGAGAGAGAGAGAGAGAAGCGATGGGCTCCCTCCCCGCCGCCGCCGCGGCGNNNNNNNNNNNNNNNNNNNNNNNNNNNNNNNNNNNNNNNNNNNNNNNNNNNNNNNNNNNNNNNNNNNNNNNNNNNNNNNNNNNNNNNNNNNNNNNNNNNNNNNNNCGCGGCGCTCGCGCTCCTGTCACTGCTCGCCGTCGGCAGCTGCCGCGAGGCCCAACAGTTCGACGCGAGCGACGCCGGCGTCGACGCGGAGAACTTCAACACCAGCGACGCCAACAGGTTCAGGGGACAATGGCTGCCAGCCAGGGCCACCTGGTACGGCCAGCCTAAC…	gz_contig_9422	100	419	gi|242040215|ref|XP_002467502.1|
aj_contig_842	CCCGCTACTTTAGATCCTGGGCGAGCTGAGGCTGCCAGCAAACACGTGAGGGCACTCAACACCCAGTTTGCAAGTTGGGTTCAATTGCAGCTGCAAAATCATCCACTTGAACTCTGGGAGGATGGTCTCAAAGATTACATGTCACATGCTTCTGACATAATGGAAAAATTCAAGGATGTTGTCAACTGGCTTAGGAAAAATAAAGCAGGTTCAAAAGGCGCTTCTTTCCAAGGTCCACTCAAGGATGAGAAGACTAATTTGCCAGCAGCAGATGGTAGCAAGTCTGTGATAGCACAGACAAGTTCAGATAGTGGACAAAAGGTTCCAATTACATCACCTTCTTCAGTTTCACAGAGCCCCAATTTGCAGAACATATTGTCTTTTCCTTCTCAGCAAAAA…	gz_contig_7737	99.79	1418	gi|414585826|tpg|DAA36397.1|
aj_contig_843	CTGTTCTAGAAAACGTCTCAGGAACTTCGCTTAGCAGCGGTACAGATTTACATACTACCCGGGGCCACAGTTCCAACTGGCTTTACAGATACCTAAAAATGTTTCAAGTTGCTAACTAACCTAGGATATTTAAGCCCAGGTCCCCGATTCTCAGAATCTATTAACAGTACCAGAGCATGATGTACAAAACAGAATCCAGGGGAGCATATTGTAGATAAGCAGGTCAACAAAAGCATAAACTCCATCGCCGCCATGCAATTTTCGCTTACTCCTTGTTCCGGGTCGCTCGGTCCTTCTTGTGCCCACCGAGAATACGGGAGATCTGCAAACCTCTGCTGAACGCCTGGTTAAAGAGCATCCTAGTCTGGAATTCAGACACGAATGGGAACCAAGCAAGGA…	gz_contig_873	100	3167	gi|242097154|ref|XP_002439067.1|
aj_contig_844	CATGGAATGACAAAAGTAAACCATAATAAACTCCAACTGCATAATCCAAAAGAGCATTCCAGCAAAGTTCTATTAAATAAGCACTAGATAAAGGACCAAACAGTTCTTTGGTATTCCCTGGACAATCACAAAACTGATATTGGTTCAACATAACTAGGTTTTAAGACAAGCTTGGTTGAATGGCCCTAGTATCTTATCAACTTCACAAGAGCTCAGCAATTTAGAACAACCTGTACGGTTTTCCCATGGTGCTCTTGATGTACAGGCACCTCACATTCTGCCAGTTCTTTTTCAGAAGGGACACAAGGAAGTTGACGCTCATTTGGATGTTCTGCTGGATCTGCTTCTCCTCCATGGATAGGTTGCCCACAGCGACACCCATGCAGAGAACCTTCTTCA…	gz_contig_3247	100	917	gi|42407951|dbj|BAD09090.1|
aj_contig_847	GATCACAACACATTTGGGCACCTTATTACAGATTATACAGACCCAGTGCCAATACAATATTCCCAGAGAATGACCAACGACGTCGGGTGGGCAGGCCTCAACCCTCGACCTTAGTCTCTGATGCCGGTTGTTCCTGTTGTTGCATGAACGAGTGATAGGTCTCGACCCGAGTCTTTGACTCAGGCTGCTCGAGCCCATCCATGAAACCGAGCGTCATTGCTAGGAAGTCCTTCATGTGCAGTTTCTTCCACTCCTCGAAATCCCATTCACCATAAAGATTTGGATCCTCTGCATCACTCCATACATAAGCGTCAGCAATCATTGTCGCGGAAGAATCAGTTAATGAAATCTCAACTCTTGCCCTTGTATACTCCACATCTTCAAATGCATCCAGGACTT…	gz_contig_19950	100	410	gi|242096952|ref|XP_002438966.1|
aj_contig_848	CCACCAAGTGAGAGCCATGTGGTAAAAGGCAAAATTTCTATCAAGCAAACATTGTTTGCTCCAATTGCAGGGTCAAGCAATAAATCGATCAACATGTACTTCTTAGATCACAGCCCTTCAGCTTATATACCATTGACCAACATGGGCACATAGCCTTTCCATTTATATGCTCTTGTTATGCTTCAGTTTATATACCTATGTGAAGAGCTATGACATGCAGTCATTCTTTTATTTGGCATCAATACCATTCTATACCATTCTGCTCAAAATATTTTGAGGTTACTCTACGTCGCATTCCATTATGTTCAGATTCCATGCCTTTCTCAGAGATCACCATGGCAGGAGTTTCATCCATTTGACAACCCAAACCATTCATGGCCGGTCTCCCATTACTACCAA…	gz_contig_11113	100	2870	gi|242096572|ref|XP_002438776.1|
aj_contig_850	GTATTATAGGGAAATAAAGGGGCATTATCTAGTGCCCAAAAAACTGTACACAGTGCTATCGTACAACATCTGCAATGACTACACGCCCAGCTTCGACGTCACAATCTGTAGCCAGTCATGTGCAAAGTTTCTTTTCATCTGCAAAATTACCAGAGAGGAAGTGAACATCTATTAATCTAATCCTGACGTGCTCAAATTGTCAGTGCTCATTTCGCGTCACCTAATCTGAAACTATTTTGCGCTTTTACACTCTCTTTCTTGTTACGCTCTTCCGTGGTTCCTTTTTGCTGGGAGCGACCCCTGAACCTAGGGAAGTCATTCCAACAGCACTTTGGTACAAGTCCTTTAACCTTGGCATGCTGATCATCAGAGCAATCACAGAGACTCCAACTATGAGCG…	gz_contig_2308	99.83	3452	gi|413947983|gb|AFW80632.1|
aj_contig_851	TCGAGACGCAAATTAACAGGGCAAGCAGCAGCACACCACCGAGTGGTGCTAGCAAGCTCGATCACACAGCCAACAGCAAGGTCCTAGCAGCAGCCGCCAGTACACAAGGGAGGATGGCCTCGCTCTTAACCCAGGCCGTTGCGGTTGTGGCAGTAGTCCTGTCCGTACTCGTCGCCATAGGCGACGGCGCGGAGAACTACAACGTCTCCGCCGCGACCTCTTACGACTCCGGCTGGCTGCCGGCTAAGGCCACCTGGTACGGCCCGCCCACCGGCGCCGGCCCCGTCGACAATGGTGGTGCTTGCGGGTTCAAGAACACCGACAAGTACCCGTTCAGCTCCATGACGTCCTGCGGCAACCAGCCCATCTTCAAGGACGGCAAGGGCTGCGGCGCGTGCT…	gz_contig_1481	100	1052	gi|44894808|gb|AAS48885.1|
aj_contig_853	TTGATTAATCACCGTCCGATATACGATGATGATGATTATGACGACGAATGATAAATTATAAAGCGACAGTGGGCGGGAGAGCGTACCTTGTACGCCTGCCTCCTCCATTTTCCCACACGGCTCAAGCTTAGTTTTTGCACTGCTCCCCCATACTTTTCCCCCAATTAGGATCACCCGAAAACACACGAGACGACGCCTCACCTAAAAGCGACAGCCCCGCCCCCTCCCAAACACGATGAACAAAACACAACACGCGACCGATCCATGACCAGAGTACTACACGCACGCAATTCCCAACGACTAGCCGTTCCGTTCGCCGCCGTACTAGCAGTACTGTTTTATACATAACAACAATATACTCTTTGATTAATCACCGTCCGATATATGATGATACGACGA…	gz_contig_1418	99.22	383	gi|115483364|ref|NP_001065352.1|
aj_contig_854	CACGTCCCCGAGGAGCGCAAGGCTGCTGAGGCCAGCCTCAACCAGCTTCAGTACACGCCACAGCATTTGGTGAGATTGTTACAAATCATTGTTGACGGAAACTGTGATATGGCTGTGAGACAGGTCGCAAGTATCCATTTCAAGAATTTTGTTTCCAAAAACTGGTCTACTGATCCTGATGAAGGGCACAAAATACCTGAAAGTGACAAGTCTATGGTCCGTGTGAATATACTAGGCTTTATTATACAGCTGCCTCCTCTTCTAAGAGCACAGCTTGGAGAAAGTATAAAGACCTTAATCCTTGCGGATTACCCTGAGCAGTGGCCTAGCCTTCTACATTGGGTTATACATAACCTAGAATCTCAGGAAAATTTTTTTGGAGCTTTGTATGTGCTTAGA…	gz_contig_3781	99.59	2183	gi|326517242|dbj|BAJ99987.1|
aj_contig_855	CTTCACTTGTCCAGTCACATTAGAAAAGATAATGCAATATTCAGGTAGCATCCATCTTGGAATTACCTTACAGATTCATATTACATGGGTCACGCATTCTAAATTATCTTCAGCTGGAGGCAGCGTTGGTGAAACAAAGGGTTAATTTGGCACCTTCAGCTGTCCATGATAGAACCACCAGCAATGAAAATGTTCCTGGAAGGTAATCATCAAGNNNNNNNNNNNNNNNNNNNNNNNNNNNNNNNNNNNNNNNNNNNNNNNNNNNNNNNNNNNNNNNNNNNNNNNNNNNNNNNNNNNNNNNNNNNNNNNNNNNNNNNNNNNNNNNNNNNNNNNNNNNNNNNNNNNNNNNNNNNNNNNNNNNNNNNNNNNNNNNNNNNNNNNNNNNNNNNNNNNNNCCCT…	gz_contig_6168	100	1862	gi|222629189|gb|EEE61321.1|
aj_contig_857	ACCCCAGAACAAGCGGTTCGCTGGTGCTTCAGGATGCCACTCACTAAAGCAAGTTAGGGTCGCACCCAAGTACATAGCCGCAGTCTGCACTTATATTGCTTTGCATTATTTGTACATTATATGCAGCTATGACACTATGACAGGACCAGGAGCAAAATTAGACACAAAAGGACTAACGGATCACTACTTGGCACTACGCCGTCAATCATTTACAGTACAGCTCAAATGCTTCTCTGATACCGGGATTTCAGGGAAGCAGATCCTTTCCCGTCCATAAGCCCTTTCACTCCAGATGAGTCTGAATCTGCACTGTTCGGCCAGACTAGAGGGGTCAATTGCTGCTGATATGTGTTGGCATTGTCGGATACACCAAGCTTGACGATGAATGTAGCTGTGCAG…	gz_contig_526	100	2087	gi|242033275|ref|XP_002464032.1|
aj_contig_858	GTCTTTCTTAAGGAATAGCAGATATTCGAGCAGGATTATTCGATGCAAAGTAGCAAGTTCAGATTGTCTTAATAGGAGATCAAGGAGAGCAACATCCCTCAAGATCAAAGTCACTGCTTTTAGAGGCTATGCACAAAAACTCGCTGTGGAATCAAGCACCAAGAAGAGAGAACACCATCGCAGTGATGAAGAGTCTATCAATACATACAATAGGGGAAGTACCGATGCACCAAAATGGATTGGTGCCAGAAAAGAAGATTCCACTGAAGTGGGTTCGCCACAGAATGTTTCAAGCAGTTCTGCATTAGGGGAAGCTGATGCTGTGGAAGAAGCTGGGCTGGACATCGTTGAGGGTGGTTTGTCAGGTGATGTATCGAACAACAAGTCCATAGAGAAAGT…	gz_contig_2726	97.32	893	gi|162463771|ref|NP_001104881.1|
aj_contig_859	GCCCGCACCCATGGAATCGTTGATTAATCTAGTTGAAGCCAGGCTTCTCTGGGTAAGAAGCCCGCACCCATGGAATCGTTGATTAATCTAGTTGAAGTCAGGCTTCTCAGGGTAAGTGCAGCCAGAGCGCTGGATGATAACGTTTGCAGCATAGCAGCCAGCCCTCACGCAGTCTTCAATGCTCTTCCCTTGAACCAGCTGAGAGAGGAAGCCTCCAACAAAAGCGTCACCTGCACCGTTTGTGTCAACGAGTTTCTCCTTGGGCAACAGGATCACAGGGAATGTTTTCACCTTTCCATCCTCAGCCACAACCACAGGATCGGCACCCTGGGTAATCACAGCAATCCTCTTTTGTTTCCCTGAAGCCAAAGGCAGTTGGGAAATCTTCAAAGCAATTTC…	gz_contig_390	99.74	1151	gi|194693574|gb|ACF80871.1|
aj_contig_860	ATGAGAAAATGTATTAGAGTTCAAGATAACTAAATTGATCCAAAACCATACGGGTCACTATATAGTCGATACAGGTGAGGACCGAAAAAGACCATTAGATGATGGCCAAAGCTGTACTTGACGGAACTTATGCCAGTGCTACACTGAAACGCATGCAGAACCCACTACAATTTTGTCCCTGTAAATTAGTCTGCAACCTAAACTGACTATAAGCTCTCCAGTTACAACCAAAACTGCCGGCCAAGCAGTACTTTGATCTGCAAGAAAATTCTGCTGCATCCATAACTCGGTTCCGCAGCTATGATGATTAGAAACCAAAGAAACCGAGCTCAGTCGCCCTTTCTTTCTCAAATGTCTCAAAGTACTGGTATATGATGGTAACAGCAAGCAGAATACCAG…	gz_contig_1466	99.15	1754	gi|414865500|tpg|DAA44057.1|
aj_contig_861	GGTAATTCAAGTATATATTCATGCCTCACCCTCGCTGATTGAATTCTGATAGTACAATTCAAAAACATTGGCAAATGAAATTTCCAGACAAGTTAAAGAAAATACAATGATGCAGTTCTCTTGGCATGTCAATGCTCTCTTTATTCAAATCAGGCTCACTGCTTAATTCGCTTCCAGGAGAGGTTTGATTTCATCGGTCCCCTTGCCGCCCCACCTTTCCACACGAGTTGAAGCTTGTGCAGCCTCTGCTTTCCAATCAGTTTTCCAGACCACACCAAGCAATATCAACGTCTGGAGCGTAATGCCACAAAGCATGCCACACCAAACCCCCCCAACTCCAAAGTTGAATTTGTATCCCAGAAGGTATCCCAATGGCAATCCGAAGACGTAGTAGCAGCC…	gz_contig_373	98.03	914	gi|242079601|ref|XP_002444569.1|
aj_contig_862	ATCAGGCCTAAAGAAATTTTTCCTTCAAAGAACAGACCACTTTTGACATCGCTCTCAGCTTACATTTTACAAAAGTCAGGCATGCATTAAGTCCTGTAATAACAGGTGGGAGAGTGCTATGAGAAGCAATATATTACATGCCACCACCCCATGAAACCATTATGAAGTACATACCACAATCTTGATAAAGAGAACTGTTCGTGTTTCTTCAAAGACATTTAAGATGCATGATGAGCATTACTGAGAGCTTCGGCCAAATGGTAAGCTGGCATCGGTTCACTGAACTTGCAGCGTCTGCGATTCTGATAGCCAGCCACACTACTGAAGCTACCGCAGAATCTCCCAGCTCCTGATTACTAACCACACTTATTAATATAGAGCAATCATATCTCTCCACGG…	gz_contig_10165	99.61	1529	gi|143455555|sp|Q0E3X4.2|RH35A_ORYSJ
aj_contig_864	CATCAAAACAAAGTTGCAATCTGTTGTCAATCTCCCCATGAATGTCCTAGTTGACTAGTTCCATGATATTTTGTTTGGTTTCTAGAAAATTTCCTGACAAAAATATATTCAAAAGCCTGCATTACATGCGCTACTGTCCAGTCTTCAGGCAGACTTGTATAATAGTTCTTCTATGCACTCCAAGTCTGAAATAAAGCTGTTCTATACATTCCAGTAATTAGCACCCTCAGCTCGCTGTATATATAAAAGGCCATCTGGACCTTAACCCTTCTCTGATTAGGTGCTTCCTTTTCCAATACGCCAATTTTCATAGGTGCAGCAGGTAACCAAGTGACAAGCCAACAAATGCCATGTAGAGGACAAACAGCATCGGAAAACCGGCCTGGATCCTTGCAGTGC…	gz_contig_8187	98.98	881	gi|293332011|ref|NP_001170517.1|
aj_contig_865	AGCGGATCCGGCTCGGAGGAATCTCGTGGGCGCTCACTGAAGTCGAGGGAGCCAAGGGAGAAAGGCATTGCGGGAGTCTGCAGGTATGGCGGTGCTATATCCCCAAGTAAGAAGAGGAGGCATTCACCATCACCAGTTTGGGATGCCAATGTTTTGAAGCTGCAGGCAACAGATTCTGTGAGGAGCAGGAGAGAGGTAGACACTGTTGCTACGGAGCTCCTTCAGCCTTCACCACTTGTGTCTGACGTGAGCACTGTGGCAACTGCTGGTGAGTGCTCACCCATGAATCTGGACATGTCAGTTCTTTCACATGAGGCTGAGAGGTTACAATATCATGACAAGAATACAGTCATGGAGGGGGGTGAGGAAAACCCAATGACTAGAAACATTTTCACTTCA…	gz_contig_754	99.81	1580	gi|242047028|ref|XP_002461260.1|
aj_contig_866	AACGGAGAAAGTAATGAAGTACTGTATATTAGTGCCTGCATACAGGCTGACAGTACTTTTGGTACTGTATTCATTCCAGCTCTAACTCGAGCAAAAGCATAACGAGAAATCATTTACTCCTACCAGTTTCATCATGACTGGCGCGACGGAGGAAGCGTTTATGAACCCTATGGTCTGACGTGCAGACAAATTCCATAAGGCATCATTATCATCAAACGGGGCGGCGACGCAAAGGCGAAGCAGCACATGGAAGGAGATGGAAGGCGAATGATTAGTACAAGGCCTTGTCGTGCCATTGCTGTGCCATTCTACTTGTACTTCATGCTCTCAAGGGTGAAACCGGGCATGTCGAAGGAGTCGGCAAACTTCTCAACCTCGGCCCTGAGGTTCTCAATGTCC…	gz_contig_1058	99.58	1427	gi|413920896|gb|AFW60828.1|
aj_contig_868	ATACGATAGGACACACAAGCCAACCAAACGAAACGAAATCATCCCGAGGCAAGAACTACCAGGGCGGAGTGTCTGGAGAACAAAATTCCAAGCAATGGCAGCAGCGTGCGCGGTTTCCGCTCCACCGTTCTCCGCTACCCAAGCTCCCCTGAGCAGCAGCAGCAACTGGTTCACCGCGAAGATTACTCACCGCTCGCTGCCGTCGCCGAGACCCCGGGCTTTCAGAGTGAGGGCTGCGAAGATGCCATCTGGGGTTGAGGTGCCCAGGGTGCAGCCGAAGCTGAGCGAACCCTTTCTGGGTTTTACCAAGACTGCCGAGATATGGAACTCCAGGGCCTGCATGTTGGGACTCATTGGCACTTTCATCGTTGAGCTGGTGCTGCACAAGGGCATTCTTCA…	gz_contig_13688	100	575	gi|242047418|ref|XP_002461455.1|
aj_contig_869	AAATAAGACCAAACACAGGATTCAGAAATTAAACCAAATAACACCATCTATGAGCAGTAACTGGACCTGTCATACAATGTCACATCTCACATGGACTACAACAATACAACGTGGTGTATACTGTTAAGTGATATGATGCCTTTATTTATTCGCATGTGGTTTTTCAGGGTAACATGAAAAAAAGGGGTCCTGTATCAAACTTATACTGTTTTCGTATGATTCAAGTAGCAGTTTCCCTGATGCTTTATGCTACAATATTGATGCCGTGAAGAAATTTATTCCAAGGAGTAACATCTACTTTGCATCTTTAGAAAGAAAATTGTGCGACTGAACGTGCCGCACGTTGGAGAGCTCGTCCACCGCGTCTCCTCGCTCAAATACAGCTGCTGCGCCCATTCC…	gz_contig_6027	100	1547	gi|212723032|ref|NP_001131193.1|
aj_contig_870	CCGGCCGGCGTTAGGATCAACCTCGCAGCGGCGCCAGTGAAATTTATTTCTCAAGAATTTTTGGTGGTCAGCTGAATCACTATGTCTCTCAGCAAGCCCGGCTATACTCCGGCCCGGGAGGCGGNNNNNNNNNNNNNNNNNNNNNNNNNNNNNNNNNNNNNNNNNNNNNNNNNNNNNNNNNNNNNNNNNNNNNNNNNNNNNNNNNNNNNNNNNNNNNNNNNNNNNNNNNNNNNNNNNNNNNNNNNNNNNNNNNNNNNNNNNNNNNNNNNNNNNNNNNNNNNNNNNNNNNNNNNNNNNNNNNNNNNNNNNNNNNNNNNNNGGTGTTCTGGTCGGACAAGATGAGTGAGTACCTCATCGACGCGCTGCTGCTTCAGGAGGCCATTGGGAACAGGGGCGAGG…	gz_contig_10075	100	1994	gi|308044511|ref|NP_001183579.1|
aj_contig_871	CGCGTTGTAGCACCTCTTATTCCAATTATCTCACCCACAGACGGCTCAAGCTTTCAGGGACAACCATGGCTATTACATATTACATAATGTTATAAGATAAAGGTAGTTTGGAATAATCTCTACATAGATTTATATGATTCCCATCCACAATCAGAAGCACATGTGAGGGGTTGCCGCAGGAGAGCCCCTAGCTAAGCTCCCCACCTTTGCTGCAAGGGGATCCCATGCCTTGGCCTCGGTGTCACTACAATGTCCACTCATGCTCGAATACATTGTACTGTTTGTTGAAGAATCACCGTCACCTTTTGCAGCCAGAGCCCTCAGACGGATGCGTTCAGCCCTGGATCCAATAGTCTGGCCAACAATGGATGCTGCTATGGTAAATGCCATTGCAGTCTT…	gz_contig_4150	99.63	818	gi|212275584|ref|NP_001130066.1|
aj_contig_872	CCAAAACTCCATTATATGCAATTCAAAAAAGCTAGTATGTCATAATGGTCCATCATGTATCTTCTAGTTACAAGACAAAGTATGTAACAGCAGTAGTTTAATGGTGCATGGATGGATTATTATTCAAAAATTCCCGAGGGAATTTTAATTAATTCTCTATACATATTAAGGCAGCAATCTTTCTTTTAGAGAGTTACATTTTACATCTAATCATCATCCAAATTATTAATGTCTTCAGAATTCCTCAATCACGCTGGGACTCGAAGGAAGAATCAGATAGGCGATTTTTGGCGCTGGCCACGACCATTGTGCCTCTTTTTCTCACATTCTGGAGTAGCCTTCATATTGCTCCATGAATGAGTCGTTGAACTTCTTGAAGCTCGACATGATGGCTGGAAA…	gz_contig_5409	99.59	1463	gi|115470235|ref|NP_001058716.1|
aj_contig_873	CGCCCGTCCAAAGAGACAACTGGCGCTGGCAGCCCAAGCCCTCTCTCGTCCTCTCTATATGCACCACTCCCCCTCATCTGCTTGCCGCATCGCATTTCTGGACCTCCTCTCGATCCGTTTGAAACCCAATCCAGTCTCGTTTCCTTCGTCGCAGCTCCCTCTTCCGTCCCGATGGCGAAGATCAAGATCGGGATCAACGGGTTCGGCAGGATCGGCAGGCTCGTTGCCAGGGTGGCCCTGCAGAGCGACGATGTCGAGCTCGTCGCCGTCAACGACCCTTTCATCAGCACCGACTACATGACATACATGTTCAAGTATGACACTGTCCACGGACAGTGGAAGCACCATGATGTCAAGGTGAAGGACTCCAAGACCCTTCTCTTTGGTGAGAAGGAGGTG…	gz_contig_3641	99.16	1421	gi|413937638|gb|AFW72189.1|
aj_contig_874	GTTGTAGCATCTCTTATTCCTCGTCTCACACCCCACAGATGGCTCAAGCTTTCAGGGACAACCATGGCAATTACATAGTATTATAAGATAAAGGTAATTCTAGCATAATCTCTACAGAGATATATGTGAATCACATGGACACTCAATCAGAAGCATACACCAGGGGTTGCCGCAGCAGAAGCCCTAGCTAAGCTCCCCACCTTTGCTGCAAGGGGGTCCCATGCCTTGTCCTCGGTGTCACTGCAATGCCCATTCATGTTTGAATACACTGTACCATTTGTTGAAGAAACACCATCGGCTTTTGCAGCCAAAGCCCTCAGACGGATGCGTTCAGCCCTGGACCCAATGGTCTGACCAACAATGGATGCTGCTATGGTGAATGCCATTGCAGTCTTGGGC…	gz_contig_3019	100	782	gi|212275584|ref|NP_001130066.1|
aj_contig_876	CCAGCTTCCGAACCAGCCCAAGCCATCTCGAAAACGAGCAAGTAGTCACAATATTGTTCAATACTTCAATGGCGTATTACCTTCACCCCACATCTCCTACAGCAGAGCCCACATACAGCATGGATGTTTCAGCACAAGATGCCTTTTCTTACCACATGAAAACAAGAGGAACACGAAGAGACATTAAAGCTCGCTATAATTCCTCCAAACAGCCCGGAACTCCTCTCTGAATGTATTCAGGCGTGCTTTCAAGTTAGGCGTTCTGAAGCTCGCATGAAGCACAGTTGCAAATATTGCAATAAGAAGTGCCCACAGGACTGTGAGGAGACTGCAGGAGGTCAACCAGAGCATACAGCTAACTGCAGAAAAGAATAGGACAAAAACCCAGCGAGGTCGCCC…	gz_contig_4005	100	737	gi|125552574|gb|EAY98283.1|
aj_contig_877	AAACAAGCACTTAAATATTTCAAGGTGTTCGTCATCGATCCCATCATAGCCGAGCTCTCTCAAGATACATATACACTTGACTAGTTGCTCCATATTAGAATCTAGAGCCAGCTTGAGAGAAACTGTGTGGAGGCCTGCTCCAGGGCAGAGCGGCGAAAGAGAGGATGAGAGGATTTGAGAGGAAAGGAGTCCGGCAGTACAACCGGTCAGAGGTGCCGCGGATGCGGTGGACGGAGGAGCTGCACCGGCAGTTCGTCAAGGCCGTCGAGTGCCTTGGCGGCCCGGACGAAGCAACTCCGAAGCGAATTCTCCAGCTAATGGGCGTGAAGGGAGTTAGCATATCTCATATCAAGAGCCATCTTCAGATGTATAGAAGCTCTAGCAACAACAGTACCCATC…	gz_contig_31391	100	743	gi|242093874|ref|XP_002437427.1|
aj_contig_878	GTGCCGCGCGGCCAGGTGGATCTGGTCGACTTCATCGACTGGACCGGCGTCGAGTGCCTCAACCAGGACTCGTCCCACAACATCGCCAACGCCCTCAAGCAGGGTTACAGGGACGACGATGGGCTGTACCTTGCCAGCGATTCCGACGAGCAGCTTCTGATCTACATCCCCTTCATGCAGGTGGTCAAGCTGCATTCCACGCTCATCAAAGGCCCCGAGGATGAGGGCCCAAAAACAGTAAAACTATTCTCCAACAAAGAGCATATGGGTTTCAGCAACGTCAATGACTATCCACCAAGTGACAGTCTCGATGTGTCATCCAATCATTTGGTAGAGAATAAGCCTATGACAGTAAAGTATGTCAAGTTCCAAAATGTTCGCAGCCTGACTATATTTATT…	gz_contig_8680	99.53	638	gi|357111379|ref|XP_003557491.1|
aj_contig_879	GTACATTTTGTCAACAATGAAAGTTTAAGTAATCGTCGGATTGCATGTTCCATCTAAACTAATCATAGGTTTACATCACAAAGATTATGGCCGTGCACACGCACGCCTGTGTCAAAATTTACATGAACAGTACATTGCTCTGAATTCTGAATCCAAATCAGGACACGATTGACAGCTGACATATCCTATGGGCAAAAAGGGTACATGTTCACTCTCTACACTGATACTCCTGGGCTCTGAACTACTCCGTGTCTCCAATTACTTGTCATTCTAAAGTTCATACTTGTCGTTTTCGCTTCTCAATACACCTCTGTGTTCTCAATACATATCTATTTCTATCTCTTTTCTCCTTTTTTCAATACATCTCACCTTTTTCACCGTTTTTAATCCCATGGCCAA…	gz_contig_6427	100	1949	gi|242056951|ref|XP_002457621.1|
aj_contig_881	GCACCTCCCAGAAAATGATCATATACTTGTCAGTCCCAGTGCTTCAAATCACAACGAATTATTCTCCTGACAGAAAATTCATTCTCGGACAAAACTACAGCCCATGATATAGACTCTGCTTTGCATATTCAACTGCATGCAAGATAGACTGAATCTTGTTTCCTTGGCAAATAAATGCAGGCCATATCTGGAAAAAGAACTGACCTCCAGCCACACCTCAACTTGTGTATTTGAGGGAATTCCCTCATAAAACACATGAGAAAACTAATCTATGACACTATGTTCATCAAGTTTGGGATCCTTCTATTACCCATTGCCAAACCTTCAGCTCGCCGGTCCCATCCCCAGTAAAAAATAAACCACTAGGTCCCATTTGTATTGCTCTAATTTCCTGTTTGG…	gz_contig_6201	98.96	1157	gi|205688480|sp|Q0DYP5.2|C3H17_ORYSJ
aj_contig_882	CAAGCTTCTGAGGCTGAAATAAAGGCATTATGTTTCAATTATGCGGTAATTTTGAAGGAAAAAGAAGAGCAACTGGGAAAACTTCGTGAAGAAAATGGATCTCTTAAAAGAAGTTTGGAGAGCTGTAAGGCAGTTTCAGCCAATTCTAATGGCATTTTGGAGAGATCACCGAGCAGAGTGCAAAGAAATGCAGTTCTGGAAAATTCATTAAATGTCACCATGCAGAATGGATACGATGGTGGTTCTTCAAATGCTATCCAGCCAAATGGTGTGCATGTGACAGGGTATCAAAAGGGAAATGTATTGGAGGAAGAGCGGGTATACTTTGCTACCAAGCAGGCTACTCTTGAAAGTGAAATCAAACATTTGAAACAGCAACTCAGCAATAATTCTGAGAAA…	gz_contig_8028	100	1076	gi|414870518|tpg|DAA49075.1|
aj_contig_884	GTGAGAACATAATAACAGTATAGGCAGACACAGTTTTTTTATTTCTAATAAATTCAGCACTCTTTATGCGGAGCTGACTCACAAACATACAAATACAGAGATTTGTTTGGCACTATCACACCAACAAAGCATACATATCATCATCGTTCAAACCATACAAGTAAAAAGCTCTAGAGCCAGATCGTCGATACTGGCTGGCTCCTCCTTATTCTAGACTGTCGTCATGTTCACACTTCACACATATGTTGTGGATCATCATCACAAGCAACATAGGAGTACGTATTACGGATCAGCAGTTGCAGGGGT	gz_contig_3537	100	284	#N/A
aj_contig_885	CCGCCAGCGTCGACAACGGATACGGTGTTGTGCTGAAAAAGGCAAGGAAGGTAGCTAATGGGAAAGGACATGCTAGTCTACCAATGGGAGCATTTGTGGATACTCTTGTTGTTCAACCAGATGATCTCGTTCAAGTGATCGCAAAGGATCTTTCACTTCCCATTAAAGGTCCTTGTACAGCTCCTGAGTTCAATGTGGTGGCTGAAAGTGGATCCTTGCAGCCTCAAGTTTCACATTCAAGCAGCATGAAACCGCCTGAATCTCAAAATATATCTCTGCTGAAACAGGTTCAGCAGGGCAACACAACAGGCCAGGAGAGTAACACCTGCATTGGGAAAAATGCTCAAATGTACAGTGATGCTGTGAGTGGTAATTCTTCTACTGGACATGTGGGGCCAT…	gz_contig_20134	100	1319	gi|212723268|ref|NP_001131626.1|
aj_contig_886	GGTGGAGGCCTACCTGAAATTGTCTGGACACTAAAGTTCAGAACGAGCACTTGAAAAGAAAATCAGTCAAAGATCAAACATTTATTGTCTGCTTTTACTGAAAACATTTATAGTATATACACCGTTTATGGCAAAATGTAAAGTGCAACATGAAATTACAATTAATAAAAAAGGTTGCAAAGACAATTAAAAAATCAAAATCCTGAAAATACGGTTACTGAACTACCTACACTGATGAGATATCAACCACATGTTCTTCATTGAAATGAACCATAATAAACTGTCTTTCTATTTTGGGAAAAAACNNNNNNNNNNNNNNNNNNNNNNNNNNNNNNNNNNNNNNNNNNNNNNNNNNNNNNNNNNNNNNNNNNNNNNNNNNNNNNNNNNNNNNNNNNNNNN…	gz_contig_11809	100	305	#N/A
aj_contig_887	TGGCGTTTTCTTGTGTACGTTTACTTAGCATATATGCAGGCTGATGAAGACAACGTTCACAGCAGCAACGGGCTTTCTAATAATGCACCCTGCTCTGCTAAGCTCTACAGTGTACATCTCCCAGGCTTTTGTGCTACAGTAATGAGTAATGACTATACATCGTCTACAGCTGATATGTTGTCATTTGAACCCTATATACATTAAAGTAAGAAACCAGAACTTGGCTCATCTTCAAGCCCATCGAATTCCCACCCGCTGATCTCGTCAACGCTGTAATCGTGGTCAAACTTCCCCATTTCTGAATCGGACTCTGATGGTAGCCGTGTCCTGAGCTGAGGCGCGATCGGGGAATCGCTTGAGTGGTTTGGTGAGGCGGAGACCTTGAACGGACGGGGTCGT…	gz_contig_13679	100	1142	gi|357112817|ref|XP_003558203.1|
aj_contig_888	CGGCGCTCAGCCGGCTTCTGCGGTCAGTGCCCAACGGGTGCGTCATGACCTACATGTACCCGACCTACATCCCCATCGATGCAGCGCCCAGGAATGTGTCCTCCGACAGGTACGGGCTCTTCCTGTACCACGAGGGCTGGAAACAGATCGACTTCGCCAAGCACATCCGCGGCCTCAGTGGTGTGCCCGTGCTTTTCATCCCTGGCAATGGCGGCAGCTACAAGCAGGTCCGATCATTGGCTGCGGAATCTTTTCGAGCATATCAGAATGGCCCACTTGAACCCACCTTTTATCAGGAAGCATCCACCACATTGTCAGTAGAGGAACTCAATGAATTTACAGTGCCAGCACGATATGGTCGCATGCTGGATTGGTTTGCTGTTGACCTTGAAGGAGAAC…	gz_contig_1715	99.75	2414	gi|414884829|tpg|DAA60843.1|
aj_contig_889	CCGATCTAATATCTCTATAGACGACAGCAACGGTTACATACAGTACAACCACAGATTGCTCTGGATTCATGTCTGTCCATTGTCACGGTTTATCATCTACCTGCAGACAGCTCTATTGCTTCTGGGTTGTAGAATGAGNNNNNNNNNNNNNNNNNNNNNNNNNNNNNNNNNNNNNNNNNNNNNNNNNNNNNNNNNNNNNNNNNNNNNNNNNNNNNNNNNNNNNNNNNNNNNNNNNNNNNNNNNNNNNNNNNNNNNNNNNNNNNNNNNNNNNNNNNNNNNNNNNNNNNNNNNNNNNNNNNNNNNNNNNNNNNNNNNNNNNNNNNNNNNNNGCCCAGTCGAACCTCCTCTGCATTCGCTCATACTCATGCCTCCTGGTCACTTCCACCTGCTGCCACTCCT…	gz_contig_6142	99.71	1019	gi|242061338|ref|XP_002451958.1|
aj_contig_890	GCTGCGCACTCACCGCAGTCCAAGCAAAGCTCCCACTACCAGGCTACCAGCAGGTCCAGCACACAGCACCGTCCCATTTTCTTCGCGCGACGTCTCGTCCGCTCTAGCCGTTCGCGTCTCCACAGGTCAGCGAGTACCGGCGCACCGCCACCAGCCATGTGCGGCGGCGCCATCCTGTCGGACATCANNNNNNNNNNNNNNNNNNNNNNNNNNNNNNNNNNNNNNNNNNNNNNNNNNNNNNNNNNNNNNNNNNNNNNNNNNNNNNNNNNNNNNNNNNNNNNNNNNNNNNNNNNNNNNNNNNNNNNNNNNNNNNNNNNNNNNNNNNNNNNNNNNNNNNNNNNNNNNNNNNNNGCCGCCGCGGCGGGTCTCGGCGGGCGACCTCTGGCAGGAGAAGAAGAG…	gz_contig_5915	100	1190	gi|242092282|ref|XP_002436631.1|
aj_contig_891	GTGCTATCATACAATATATAATTAGGTTATGGTTCCGCAACACAAAATATCACATGGGGTTTATTACTAAGTACATGGGGATTAGGCTACTAATTAATAATCTGAACACCCCTGCTCTCCCTCTATACAATGGGGTCCATGCATAGTCGATTAGTAGGGTACTCTCTTTTTTCTTCGTCAAATATCAATAACCATGGATGGTGACTATATATATGTTAAAGTTATTTCTAAGCTGCCATTTTCACATGGGACTTGCTGCTTCAGTTGCTGCTTTCATCGCGTGATCCGTACCCGTAGGGGTTCTTGCTTGCCCAGTTCCACAGGTCTCTGCACATCTCCTCGATCCCGTATTTTGCCTTCCATTCCAGTTCTTTCTCGGCCTTGGCAGTTGCAGCATAG…	gz_contig_1186	97.18	851	gi|242040933|ref|XP_002467861.1|
aj_contig_892	AGCAATTGCCAGGAATACTAGATCAGTAAGGCAGTAGCAAACAAATGAGAACATGTATGAGTTCAAGATGACTAAATTGATCCAAAATCATCCGGGTCACTATATAGTCAACACAGGTGAGGACCAAAAACGACCAATAGATGATGGCCAAAGCGGTAATTGGGCGGAACTTGTGCCACCATACTCCCCTGAAAACGCATGCAGAACCAACTACAACTTTCTTCTTGTAAATTAGTCTGCATCCTAAACTGACTATGAGCTTCTCCAGTTACAACCAAAACAGCCGGCCAAGCAGTACGGTGATTTGCAGGAAGATTCAGCTGTACCCATAACACGACTCCCGCAACTATAATGATTAGAAACCAAAGAAACCGAGCTCAGTCGCCCTTTCTTTCTCAA…	gz_contig_1488	100	1433	gi|414865500|tpg|DAA44057.1|
aj_contig_893	GAGGTAGCGGATATTAAGAGGCTTAATGGCCTCTCAACTGACCTCCAGATGTTTGCACACAAGACTTTGCGGATTCCACTCCCTGGGAGGCATCCGTCGTCTTCCTGTCAGCAGAATGGTTCGTACGAGAATGATCACAGGGAGTGTACTCCACGTCGCATCCATGAAGATATCTTGGATTCGGTACTTAGAACACCAAAACACAGAGTTTCATCAGCCATGAGCCTTTTGCAGGGATACTATGGCCTTGCACCACCTCCAAAAAGAGATCACAGAGAAGGCACAGAAATGGCAGTATATGGGAAAGGCAAATCTGTCTCTTTGGATGTTGAGCCGTGGTTGGAGCCACCAAATTCTGACCCGTTCCCTCTCCATAATAGGAAAACCAGAAGTTTGACA…	gz_contig_7008	95.62	821	gi|242039325|ref|XP_002467057.1|
aj_contig_895	GTTGAACATATCTGTGCGAGGACCAGATTGCTTGGAATGACAAATATTCTATTGACCATGCCTTACTTGCTGGCCGTTCTTTAGTTCTAGTATAGTGCTCCTTATGACCAGCTTTACTCGTACATATGAAACCTATAAGGCATTTTATTTGTGTACCATAGCATTAGATTGATAACATGACGCATCCTTGTTGATAATTTACGGCATCTTGAAATCTTGTTCTGTAACAATAATTCCAACGAGGTGATTTAGAAAGTACAAAGCATCTTATTATCAAGTTCTTGGCCCCAAGAAATATCAAGCAGAACACCCTAAGCCTGAATACAATTATTAACCTTTTCATGTACTCCTTGCTCCTCACAATTTGTTTGTCTTCATGAGCTCGATAAATTCACCGAA…	gz_contig_5285	100	1163	gi|125540839|gb|EAY87234.1|
aj_contig_896	TTCAGTCAAGATACCGAAATGTTTCTTACTGCCAATCCTATAATCAACAATCCAGACACAATGAAGTTAAAAGAACAACATTTCAGCATAAGCAACACACTACTTTTATGTACAAAAATTATTCCGAAGTCTTCAGATCAAAACGGAGATAGAGATATCTTTGCTACATCCAAATAGTGTGTAGCTTGGTAGCAAAGCAAACATTAACTTGTACCAAAGCTTTATATTTCAGCTTCACATTTTTAGCAAAGCAAACATTAACTTATACCGAAGCTTTATATTTCAGCTTCACATCTTTGCTGCCAATACGTAACAGCAAACAGATGGAGCCACATCGTAAGGTCAGGAGGACTACATGATCAGAGTCTACTCCTCCGAGGCATGGATGGCAGACACCGT…	gz_contig_1496	99.63	812	gi|115446097|ref|NP_001046828.1|
aj_contig_897	GCACAAGGCTGCTTACTTCTTGAATCCCTACTATAGCTACAATGATTCATCCATATTTGAAGCTGAGGAAGTTATGGATGGATTCATTGCTGCTGTAGAAACATTTTACCATGGTGATTATGACAATCAAAACCAGGTGCTGAATGTGGATTTGAACAAGTTTAAAGATCAAGTTGGACACTTTTCAAAAAATGTAGCTCTAGTTGGTTGCAAGAACTATGAATTTAGTCCAGCCAAGTGGTGGGGAAATTATGGAACACAGGTACCAACACTGCAAAAAATGGCTATAAGGATTCTCAATTTAACTTCAAGTGCATCTGGTTGCGAAAGGAATTGGAGTTGCTTTGAAGGGATTCATACAAAGAAAAGAAACAGGCTCACATGTGAGAGGCTGGAGCA…	gz_contig_14820	100	767	gi|242075328|ref|XP_002447600.1|
aj_contig_898	CCCTGGTGTACGTTATAGAGATGACAAGTCAAAACGGTATGAAAAGGCATTTCTTCAGCCCAAAAGGAATTCAAATGATTTTGATCCTTCCATAGATGGCATTCTCTTTTCTCGGCCTTACGAATGGAGGGTAAACCTGAAAAGCGGCACTTTATTGAGCAATGGCAACCAACACGCATGAACGGTTCCATTGGTTTTAGGGTGCCTCTTTGTCTAATGCTAAATCAAGAGGGCGTCAATGTTGCGCTTGCCCTCTGGACCTTTACTATACCAAGACGAGACATAGTCACCATAGACTATGTCCCTGTACTTTTTTGGCTCATCATTGCTCACAAGTAGTGGGGCAGTGCATATTTTCCTGGATTTTGATGGATCATAGAACGTCGCTACTGACAAGCG…	gz_contig_19130	98.02	755	gi|125554188|gb|EAY99793.1|
aj_contig_899	AAGGGCACATTTTGCTGCCACTGCGATTCAAAGTGGCTGAGACAACAGGCTTGCACAATGTACTCGGAGTTCTTCACCTTAACCACAGATGCTGAATCCTTAAGGCATCTGGCATGAACTCACGACATGGGCTTGCTGTTGCTGTATTCTATTGGTTTGGTTCTGGTTGAGGTGAGGTAGGGGACTCTGGTGGTGCAACAGCAAATTGCATTGTTCTCCCATTTCTGTGAAGAATGATCGCCACATCTGTTGGTAGTAGCATTGCTTCTTCTTGTCTCTGTCTTTGACGCTGCATGATACTAATGGCCCAAGCCATGATGTAACAAGGCAACAGAAATCCAGCTGCCCTCAAAAGAAACAGCGAGAAAATAGCAGATGCATCATCTTCATCGTCACTAT…	gz_contig_7597	100	656	gi|219887445|gb|ACL54097.1|
aj_contig_901	ATTAATATCCGCTGAAGCCCGGAATCTCTCATTTGGGAAATTCCTGGAACTCAGTTTTTCCTGCCACTCTGCGGCAAGAAGGTTATCCATATGTGGGCATCTGGTGAATAGGGATTGCTTACGTTTTTTTGGGTTGGGCTCTAAAGTTGCTATGTTCCGGTATTCTTCAGTTGAAATTTACACTACTTGCAAACCACAACCGTCTCTTCAGTTCTTCAATCCCGTCAGACAGGATTGGTTTGAAGGAGAAAAGAGGCATGTTCATGCTAGATGCATGATGCTTTTTTCAGAGGTTGCAAGCTTGCTACAGCGTTTGAAGAATGAACATCCTGATGCACTAACATTTGCTATCAGTTGTGGCCTCTCACTCCCTGTTAAGGACTTCTCTGAACTTGAAGA…	gz_contig_8761	100	1391	gi|242080197|ref|XP_002444867.1|
aj_contig_902	AACCAAAACACATGCTAACTAATACAATACCCGTCACTTGTTACTTAACAAAGTACTGAGCAGATAAATTCTGTTCTTCTGCATAACGAAAATCTTGAATAACTTCTGTAAATGTCCCAGAAGCTATCACTGATCCTTTTTGGGTTTTTTCTTCCTTGAAGCAAAGCTACTCGGCCCGACTGCTTCTAGTGTTATTCGCTTTGTCCTTGAAGCAATTTCTCTTGATTCAGCATCATCCTTGTTGGGCATATCATTATCACCACAATCATCACCATGGCCACCAGATGCACGATCATTCTCTGAAGCATCTCTCTTTCCCGGAGAGGACTCCCATCGGTCTTTTCCATCGTCATCATCCCAACGACTTCCAACAGGTGGTACCCAGAAATCTGGATTATC…	gz_contig_13605	98.18	659	gi|223946667|gb|ACN27417.1|
aj_contig_904	GTCGCCCTTCACCTACTCCTTCCCGCTTGGACCCGGCCGCAAGTTCCTCCGGCTCCACTTCTACCCGGCGAACTACACTGGCCGTGACGCCGCCGACGCGCTCTTCTCCGTCACTGTCGCTGCCCCGGGGGGCAAGATCACGCTCCTCTCCAACTTCAGCGCGCTCCAGACCGCCACCGCGTTCAACAACGACTACCTCGTCAAGGAGTTCTCAGTCAACGTCACCTCCCAGACGCTCGACCTCACTTTCACCCCGGAGAAGGACCACCCCAACGCCTTCGCCTTCATCAACGGCATCGAGGTCGTCGACTCCCCCGACCTCTTCGACATCTCCNNNNNNNNNNNNNNNNNNNNNNNNNNNNNNNNNNNNNNNNNNNNNNNNNNNNNNNNNNNNNNNNN…	gz_contig_1849	99.71	2033	gi|413955819|gb|AFW88468.1|
aj_contig_905	CTCGACTGGAGCTGGTGTGCCAGCACAGGCTCCATGGAAACATTGAATCAATGGCCGTGCTTTCTGATGGGACGGAGAATAGACGAGACTCCATTGCACTTGCGTTTAAGGATGCAAAAATAACAGTTCTGGAGTTTGATGACAGTACCTATGGCTTGCGAACAAGCTCAATGCATTGCTTCGAAGGTCCTGAATGGCAGCATCTGAAAAGGGGCAGGGNNNNNNNNNNNNNNNNNNNNNNNNNNNNNNNNNNNNNNNNNNNNNNNNNNNNNNNNNNNNNNNNNNNNNNNNNNNNNNNNNNNNNNNNNNNNNNNNNNNNNNNNNNNNNNNNNNNNNNNNNNNNNNNNNNNNNNNNNNNNNNNNNNNNNNNNNNNNNNNNNNNNNNNNNNNNNNNNNNNN…	gz_contig_7325	99.88	2399	gi|357162146|ref|XP_003579318.1|
aj_contig_906	ACCGTAAACGAATTCGTTCCATGCGTCTGGCACGCCGGGGAGGCACCAGTGGATGCAGTCCGCGAATTTCCTTGGGTTTGCCTTCTGTTCCTTCGTTAGGAGCTTTCCCTGCCGCAGTGTGTGCACGGAGGTGTGCGCATCCTTGCGGATCTCTGACAGCGCTGTTATGTTGATGAAGTGCACCGGCACCTTCTTCATCGAGCTTGTCACGCGCTGTGCCGTCGCGAATAGATCCCAGTCCGTGCCCAGCTCCAACGTTTTTGTGTAATTGATTGCCGGCTGTGTTTCAGAGAAGCATTTTATGGCGTTAGGACTGCCCCAACCTTCACTCTGCATATGTACAGGTGACACACTCATGAATAAGACCGTTGTCCTGTTTGGATCTATGTGCTCTTCTAC…	gz_contig_3361	100	497	gi|242090195|ref|XP_002440930.1|
aj_contig_907	CGCTCCTCCTCCTCCTACCTCACCTCCACCCTGGTTTCCTCTCCTCGCTAACCCTGCTGCAGGAGACTACGTACAGCCGTATCCGTGGCCATGGGAACCTCCACCTCCTCGAGCACGACGCTCGCGGCGGCGGCNNNNNNNNNNNNNNNNNNNNNNNNNNNNNNNNNNNNNNNNNNNNNNNNNNNNNNNNNNNNNNNNNNNNNNNNNNNNNNNNNNNNNNNNNNNNNNNNNNNNNNNNNNNNNNNNNNNNNNNNNNNNNNNNNNNNNNNNNNNNNCGCTCGCGGCGGCGGCGCTGCTGCTGCTGCTGTCTCTGACGGCGGCGGACATGTCCATCCTGTCCTACGGGGAGGAGCGGAGCGAGGCGGAGACGCGGCGGATGTACGTCGAGTGGATGGCGCG…	gz_contig_2563	99.7	986	gi|413919736|gb|AFW59668.1|
aj_contig_908	ACAAGGGTAGGCGTGGTGCAGATGACCTCCGTCGGGGACGTTGACGCCAACTACGCCACCTGCTCCCGCCTCACCAAGGAAGCAGCTGCTTCGGGAGTGAAATTTCTTTGCTTTCCTGAGGTCTTCTCATTCATAGGCTCGAAAGATGGTGAGTCTGTTATNNNNNNNNNNNNNNNNNNNNNNNNNNNNNNNNNNNNNNNNNNNNNNNNNNNNNNNNNNNNNNNNNNNNNNNNNNNNNNNNNNNNNNNNNNNNNNNNNNNNNNNNNNNNNNNNNNNNNNNNNNNNNNNNNNNNAGTCTGTTAAGCTGGCCGAGCCATTAGATGGGCCAATAATGCAGAGATATTGCTCACTTGCAAAAGAATCAAGCATTTGGCTATCTCTTGGAGGGTTTCAAGAAAA…	gz_contig_12786	99.3	860	gi|115488686|ref|NP_001066830.1|
aj_contig_909	AATAAATATAAGCATATGCCCCTGGAACCGTTCCAAATAAATACAAACAGCACAATACAGTCTGCTTCACACTTCAGGTCTCGATGCTAACTGCAATTGAGATTCCTTACAATTATGTACGCTATTTACACAACCGGCTCAAGCTTACTCCACGCATAGCAACTTACAGGCTTTCACCTGGAAACAGCAACTCACATGGCAAGTTTCCAAGGTTTTCCAATACCTCATATCGGCTTCCAGACACTAAGCACCTCTTGGAACATCTCCAGCATCAGCTCACGGTCAGCATGGTGGAAGAAGCTGTGGATTTCATCCCTCACATCGTATATTTTTCCAAACACAAACAGGTAGGTTAAGCACCCTTTCTTCAGCCTCTCCAGCTGATACAGCCACGCTACG…	gz_contig_9869	99.37	953	gi|242080189|ref|XP_002444863.1|
aj_contig_910	GACGCCGCGAGGCGGAGGGAGGCGCTCGTCCACCATCTCCTCACCCTCTTCCCCCACATGAATCCGCAGTTGATTGAAAGAGCTCTTGAGGCATCTGGAGATGATTTAGATTCTGCAATAAAAAGTTTAAATGAGTTGCGCCTGGAGTCAAGGTCTCTCACATCAGCTGCTTTGTATGAACCCGAGTACAGCCTATCAACAGCTCTTAAGTTGTCGGCTGAAGGTGCCGTTACTAATGGCCATTTGGATGTAGTTAATGGCAACCCGTCTATAACTGATAATGGTCAGACAAGTAATTATAGCTCTGAATGGGTTGAGCTATTCATCAAAGAGATGATGAGTTCCTCTGACATAGATGATCCACGAGCTCGTGCCTCTAGGGTTTTGGAGGCATTTGAA…	gz_contig_6781	100	1040	gi|125538369|gb|EAY84764.1|
aj_contig_911	CCTTGGACCTTAGATACATGGATTGATATTCGTATTGCCACTTACAATGTATGCTCCGATAGAACACATGCTAGTTGATGCTGTTGCTGTTGCATCAGTGACCTACGCAACATATGGCGCCTCTGCTCAATGGAGTCGAGTCTACCTATTGCAATGGGAATAGGTTAATCTCTCACTTCACATGTCACGATGCTTAGTATGAGATGATGGATAAAACCCTTAGGTTTATTAGAAGACATCAGGAGGAAAATGCCCAGGCATAGAACTGTTCTGCTGAGCCTGCTTCAAATGCATTCTAAGTGCATAATTGTTTATCTCAAGTGTTTTTAGTTGCTCCTGGTACTGCAAAACCAGCTGTTTGAGGCTGTGAACCTCTTGAATTTTCGCATCAAACTCTTT…	gz_contig_14046	100	938	gi|326515080|dbj|BAK03453.1|
aj_contig_912	CGTGGGTTGGAGGCGTGAGCGCGAGGAAAAGGGGACAGAGAGGGAGAAGCATCCGATCTCGATTTCTTGCCCGGTCGCGTGTCCGATTCGACCCCCCTTCAGATCTGATCCCAAACATCCCAATCCGGGCCACTCTCTTCCACAAATCGATCGGATTGGTAGGGTTGAGCTGGGGAGCCATGCGAATCGAGGAGTTTCCTGGCGAATTGGGGGGAGGNNNNNNNNNNNNNNNNNNNNNNNNNNNNNNNNNNNNNNNNNNNNNNNNNNNNNNNNNNNNNNNNNNNNNNNNNNNNNNNNNNNNNNNNNNNNNNNNNNNNNNNNNNNNNNNNNNNNNNNNNNNNNNNNNNNNNNNNNNNNNNNNNNNNNNNNNNNNNNNNNNNNNNNNNNNNNNNNNNNNNN…	gz_contig_4647	99.48	1154	gi|242040181|ref|XP_002467485.1|
aj_contig_913	GGCCGCACCGGCGGTGCTCGTGTACATGATCAACTACCTCATGTCCATGTCCACGCAGATCTTCTCGGGCCACCTCGGCACGCTCGAGCTCGCCGCCGCATCTCTCGGCAACACCGGTATCCAGGTCTTCGCCTACGGCCTCATGCTCGGAATGGGGAGCGCGGTGGAGACGCTGTGCGGGCAGGCGTACGGAGCGCACAAGTACGACATGCTGGGCATCTACCTGCAGCGCTCCACCATCCTGCTCATGGCCACCGGCGTGCCGCTGGCCGTCATCTACGCGTTCTCCCGCCCGATCCTCGTCCTCCTCGGCGAGTCCCCGGAGATCGCCGCGGCGGCGGCCATCTTCGTATACGGCCTCATCCCGCAGATCTTCGCGTACGCGGCGAACTTCCCCAT…	gz_contig_2503	100	1094	gi|269978402|gb|ACZ55932.1|
aj_contig_914	CACCAGCCTCAGTTCATTTTTAGCCATCAGATGCACTGCCGTGTCTTCAATCATACCTACGCTCTGAACGTCTTCACATGTAAGGGAGATGGTGTTGATTCTTCCGCACCTTCAGTTCGGCAGCAAGCTGATAGCACTTCCTTTTTGTTTCCTCTAGTTCATGCTCCAGGTCCCCAATTGTGCGCTTCAACTGGGTGTCTCGTTGCCGAAGTTCTTCACGCCTTGAAAACAATGCAATGTTTTCCTCACTCAGCTTCTCAATAAAATTAGGATCGAGAACACCATGAGAGCCAATCTCTACAACATCCTCATCCAAGTCTTCGGATTGCATTCTGTTTTCTTGCATTTGACCAGACAACTGCGAGTGTGTACCTGTACCATTAGCTGTCAGCCCAACAG…	gz_contig_6912	100	1721	gi|242080555|ref|XP_002445046.1|
aj_contig_915	CGTTTTCACTAAACAATCTTCAGTTAACAAATTCTAGAGTTAATCAAAAGCACGAAAACATTCTTAAACATCTTAAACCTTCAAACTTTCTACTCGAAGTTTGGCCAATCAAGATGCATAAGTGATCTAAGACCTAGGCTTCTCCTTCTTTTCCTTGAAAAGGGCAAGCAGAGACACACCAGAGACCTTGACAACCTTGAACCGGACACCAGGAATATCTCCCACAGCATGACCCTTACGACCAAATCCAGCAATCAGCACCTCATCATTTTCCTCAATGAAGTTCAAGCAACCATCATTTGGCACAAAGGCAGCAATCTTCTTGCCATTCTTCACAAGCTGGACACGGGCACACTTACGGATAGCAGAGTTAGGTTGCTTGGCCTCAATACCAATCTT…	gz_contig_8386	100	620	gi|125572544|gb|EAZ14059.1|
aj_contig_916	ATATCATCAAGGGGTCCCTCATACAAGTTCTCCACACGATACTTCTGTGCCGTCGAAGGAGAGGGAAGGTGGAATATCATCATCTCAAGAAGTGCAGTGCTAGCTGGAAGCCAAGTCTGCATAACACGCTTCATCAGAGCCTTGCCCATCAGCTCCTTCTCATCAGACTTCATGGTGACATTAAGCTTTTGCAGCATGGGCCACAATTTATCCTTCTGGTCATTCATGCAGGTGTTGATGATTTGCTTGATTGGCTCGTAGCAGAACTGAACAAATCCCCTCTTACAAGTAGGTGCGCCTGTGTTTTTGGTGGTCCATTTCTTTGTGGCCGGGTCAAAAAAGTTCTCACCCCAGAGCCTCTCCATCATCTTAGATTCATCCACTCCAAACTTGGATGCA…	gz_contig_1076	100	911	gi|242054379|ref|XP_002456335.1|
aj_contig_917	AGGTATGATTCAGAATTTTTTTTCCACAATACATAGGGTTCTGATTTATTGTCTTGTTTGTCTCCCTCCCAATCATCAAATCATCAATCAACAAAGGAATCCATCCATTGATCTGAAGAAGCCAACAAGGCCACTCGAGTGCTCATTTCCTCCTGATCTTAACCTTGAGAGTCCACTGCAGCTTGCCTTCTGGTCGTGGTATATCCCTCGGTAGGCGGAGGGGCAGCTCAAATTCACCAAGGGACGCCAGAGGTGTCTGCAGGTGCAGATTGTCCGGATGGATATTGATCTTCAGTTGCCTTGCCACCTCAGAAACAATTTCATCTTTTGTTACAGGGGTACGCAGCTCATTTCCAGTCGAGATGAACCTCCTCAACACCAAGAGTGCATTATCAAGCC…	gz_contig_9298	98.81	1004	gi|218197407|gb|EEC79834.1|
aj_contig_918	CCGCTTCAGCATCTCCAACAGTTGCAAAATCTTCTTCTACGAAATAACTCACTGACGGGGATTATTCCTGATACGCTTACAAATTGTTCTAATCTTCAAACATTGGAGCTCTCTGGAAACATGCTAGAGGGTGCTATCCCACCAAAAATAGGCCTCCTTTCCAATCTTCAATGGTTAAACCTTGGCTCAAATAATCTCAATGGAACTATACCGTCAACTCTCAAAAACATTACAGACTTGAGATTTCTCTTTTTGTACCAAAATAACCTTGAAGGTAGCATTCCATATGAACTTTGGCAACTCCCCAATATGATTGCATTGTTCCTTAATGAAAATAAACTTTCAAGTACACTCCCATCAGCTCTGCCTAATCAGACTTCTCTGATATTTCTAGACCTC…	gz_contig_14166	87.5	1319	gi|326530274|dbj|BAJ97563.1|
aj_contig_919	CTCGACACCTGTATGTGTTTTCTTTAGGCAAAGAAAAATAAGAGCCTACTCAAGAGTCACCTGAGCTTAAATAAGAGCCTACTCAAGAGTAACCTGAGCTTCGTGACCCAAGTGCTTTATGCTGTACACTTCAGCGTGCTGTCCGATAAATTCATAAGCTTTGAAATAGAACTGGAAAATCATCAAACTGTACACCGGTATTCCATTATCAATGTCAGATAAGAACGCCTGGTTTCCATGATTCAACAGATTGAGATGTAAGCCTAGGGTCTATATATTCCTTGCATGCGGTAAGGTAGAGCTGGAACTGGCCATGAGCCCATGAGAAGCAGACTGCTTGGGCAGTGGTTCTGTCACTTGGTACTGCATCAGCAGTCATAGGCTGATGCAGAGACAGGT…	gz_contig_249	100	2021	gi|218198161|gb|EEC80588.1|
aj_contig_920	GCTTCACCGGCGATGGGCAGACGTTGCTCACAGGCCGCATCAAAGAGAAGCTCAAGGAACTCATGGGCGACTACTCCGATGACACACTCGCGGAGTATACCACAGTCTTGATCAGGAATGGAAAGAGCAGGGATGAGGTTGCAAAGGAGCTACACGTTTTTCTGGGCGGTGACAATGATGCATTTGTGTCCTGGCTATGGGACCATCTCTCCTCAAATCTGCACCTTTATTTCCATCCGCCTAAAGCTGTATCTGGTAGCGATGGAGCTAAAAGCACCTGCAGCGCGCCTAGAGGATTGCCTGTTCAGAGTTTGACTAGAAGTATGCAGAATAATCATGCACCTGATGCTGAAACCCAGAAGACAACGAGGACTCATCAGAAAAGGGAGTGGGGTGGCA…	gz_contig_6799	99.78	1364	gi|413918635|gb|AFW58567.1|
aj_contig_921	GGTGTTGCTCAAGGACCGCGTCAAAGAGAAGCTCAAGGAGCTCATGGGCGACTACTCCGATGACACACTCGCGGAGTATGCCACAGTCTTGATCAGGAACGGGAGGAGCAGGGATGAGGTTGCAAAGGAGCTGCATGTTTTTTTGGGCGATGACAACGATGCATTCGTGTCTTGGTTATGGGATCATCTGTCCTTAAATATGCACATTTATTTCCATCCTCATAAAGCTGTGTCTAGTAGTGATGGAACTAAAAACACTCGTAGCGCTGCTAGAGGAGTGCCTGTTCAGAGTTTGACTAGCGATATGCAGAATAATCATGCACCTGATGCTGAAACCCAGACAAGGAATCATCAGAAAAGGGAGTGGGGTGGCATCATTCGTGAACAAGCTGAAGCAGT…	gz_contig_3057	100	1391	gi|226494638|ref|NP_001148871.1|
aj_contig_923	CAGCAACTGGCAAGAAAGCAACAGTGCCCTTATTTATTTATTTTTTTGAGCCAGATTTTAGTCTGGATGGCAGCGGAAAATCTGCTACTATTGCAAGATTATCACTGCATTATTTTGAGGGCACGTGAAGGTCCAGCAGCATTCCATGATGGAACCCCTGAATTCCACGTGCCCGAGCAAACCATTATTGTCGATGAATGGAGCTGACTTTGAACAATCATCGGATTCCACAGTTATTTGACTTGCACAGATTCCAGAAGCTTCATTACAGATTTTCTGTCTGGCATGCTTGGTATAGCCCCCTTTACTCGAACACACAAAGAGGCAGCAGCAGCAGCAAATCTCATGCACTCCTCCTTAGGCTTCCCCTCAACCAGAGCTACCGCAAAAGCTGAGGTA…	gz_contig_23102	99.56	686	gi|242053911|ref|XP_002456101.1|
aj_contig_924	AAATTCACTTGGATTGGATTCTTTTACAACAGAAGAACTTCCACTTTTTTCCACATTTTCTACCTCAAAAGTACATTGATCCAATACAACTCTAGGTAGGAATACGTTATGTTGCTAACAGTGCTCTGTTTTGCTTCACCAACTACATTAGAAACCCAAGGCAATTCTGAAGGATGCAGCCAGCAGGATAGTAGATAACAAAGCTAAGCTGTAGCTTCAATCAGGTGGCGAGAATAATCACTACCACCAGTGGCTTCGAACAGATGGTTTCCATTTCAAATATCAATGGCATCTGTTGGCATCAATTTTAAGTACGCTTTACCGGCCTTTGAACATACGATTTGTTCGGATCTTCAGTCTTAAGTTTTGGGGGTTTGATTTCGCCTTTGCGTCCCTTCT…	gz_contig_4887	100	503	gi|242041501|ref|XP_002468145.1|
aj_contig_925	CATGGGGAAGACACGTGGTATGGGAGCTGGCCGCAAGCTCAAGACCCACCGCAGGAACCAGAGGTGGGCTGACAAGGCATACAAGAAGAGTCACTTGGGCAACGAGTGGAAGAAACCATTTGCTGGATCATCTCACGCCAAGGGCATTGTTTTGGAGAAGATTGGTATTGAGGCCAAGCAGCCGAACTCTGCTATCCGCAAGTGTGCTCGTGTGCAGCTGGTGAAGAATGGGAAGAAGATTGCTGCATTTGTCCCAAATGATGGTTGCTTGAACTTCATTGAGGAAAATGACGAGGTGCTGATTGCTGGATTTGGTCGTAAGGGTCACGCAGTGGGAGATATTCCTGGTGTTAGGTTCAAGGTTGTGAAGGTTTCTGGTGTGTCACTGCTTGCACTTTT…	gz_contig_8110	100	668	gi|125572544|gb|EAZ14059.1|
aj_contig_927	CAAGATCGCGCGCGAGGATGTTGTGAAGGAGAATGACCCAACGAATAACGTGCCAGACACTATCTTTTCGAAGATTGGCCTGCAGCTGCACAGGAGGGACAGCCATCCTCTAGGAATTCTGAAGAACACAATCTACGATTACTTTGACAAAAACTTTGCTGGGCAGTTTGACAAGTTTGATGACCTCTGCCCCCTTGTTTCTGTCAAACAGAATTTTGATGATGTCTTAGTTCCTGCTGACCATGTAAGCCGGAGCTACAATGACACATACTATGTTGACGGCGAAACCGTCTTGAGGTGTCACACCAGTGCTCATCAAGCTGAGCTGCTAAGGGATGGACACACACACTTTCTTGTAACTGGGGATGTTTACCGCAGGGATTCTATTGATTCAACTCA…	gz_contig_12178	100	716	gi|218186990|gb|EEC69417.1|
aj_contig_928	ATTCTGTGTATATTTATCACTAGAGTCTACTTACAAGCATCCGCCGATCGATTAACCAACCACCAAAAACAGCAGTACATGACTTGTACAAGCATGGACAGCAACATGGCTACACCAGCCNNNNNNNNNNNNNNNNNNNNNNNNNNNNNNNNNNNNNNNNNNNNNNNNNNNNNNNNNNNNNNNNNNNNNNNNNNNNNNNNNNNNNNNNNNNNNNNNNNNNNNNNNNNNNNNNNNNNNNNNNNNNNNNNNNNNNNNNNNNNNNNNNNNNNNCACCAGCCTATGATCTTGTATACATGTGTGTCTCCCTCATCCAGCTTTCCTGATTTCTGAACATAATCATTGCTACCATGTCAGCTCTTCTTCAGCCACAGCTGAAAGAGGCTGAACGCCTGGACAATG…	gz_contig_2075	100	1523	gi|239046732|ref|NP_001132153.2|
aj_contig_929	GCTCGGCCTCTCCCTTCCGGCCTTCCCCCATTCTCCGCTTCGATCCGAGCACGCACTCGCCGTGAAGAGATCACCAGGGCGAGCCCTCGAAATCTCGCGCGGGAGAGACGATGGGGCTCACGTTCACGAAGCTATTCAGTCGCCTCTTTGCCAAGAAGGAGATGCGGATCCTCATGGTCGGTCTCGACGCGGCTGGTAAGACCACCATCCTCTACAAGCTCAAGCTCGGCGAGATCGTGACCACCATCCCCACCATCGGTTTCAATGTTGAAACTGTGGAGTACAAGAACATTAGCTTCACTGTGTGGGATGTTGGGGGTCAGGACAAGATCAGGCCCCTGTGGAGGCACTACTTCCAGAACACCCAGGGCCTCATTTTTGTTGTGGACAGCAATGACA…	gz_contig_4355	98.13	320	gi|115464585|ref|NP_001055892.1|
aj_contig_930	AACAAAATTACATCTATTAATTCAAAAGAAAAGCTGTACATTATTCATACTACAAAACAGCATCGCAACAAGGCAAACGTTATGACTGAGAAAAGAAACAATTGCCACCAAATTTCCAACCATATCTATCAAAATATCAAGGGCTCTCCGTTTCACAGTTGAGCCCCGGTTTCACCAGCGTCTATTGTGATTTTTGATCCAAACTAAAAAACCCACAAGGATACACTAACTCGCACCTAATCAATTGTTTATTTATGCAGCAACAGGCTGAACAAGACCTGCGCCTGAGGGAGTAATGTCTTCTGCGGCACCCTGGTCATTCCTTGATAAGTACTTGTCTACTGCAGCAGCGGCCTGACGTCCCTCCGTGATGGCCCAAACAACTAGCGATTGTCCACG…	gz_contig_528	100	2525	gi|242058361|ref|XP_002458326.1|
aj_contig_931	TTTAGGTAAAAGAATGGAAGGCAATTACGGTCAGAATTGCTATTTCGATTCTTCGACATAATAGCTATTTACATGACCGTACACATGGCTGTACAAGTACCGCAATAAAAATAAGCGAGAGCAACAATTTACACTTTGCCAATGGTGATCAGGATGTCAAACTAAGGGCCGGGGTCAGTTTGGTAGAAGGGGCAGTCGAGAAAAACTTGAGCCGCCACCGTTCTCACTGACAATCAAATCTGATCCAGTTTGCTTGGTGGGCTTGGAACCTCGGTTGTCCTTGTTCGAACTCTTCTTGGTTATTTTCACAGGAAGAATCTGTAACCTCGAATTGGAGTCAGTTCCAAAAGTTTCAGCAAATAGCTGATAGCTCTCTACAAGCTCCAGCTGTCGAGCAAC…	gz_contig_3912	98.91	1370	gi|242047690|ref|XP_002461591.1|
aj_contig_932	CGGCGCTGCAGGTAGTAGTAGTACTCAGTAGACTACACAGTCCATCGGTTAGCTAGGAAGACATGGCTCCCTCCGTGATGGCGTCGTCTGCCACCTCCGTCGCCCCCTTCCAGGGCCTCAAGTCCGCCGCCGGACTCCCGGTGAGCCGCCGCTCCAGCAGCGTCAGTTTGGGCAAGGTTAGCAACGGTGGAAGGATCAGGTGCATGCAGGTGTGGCCGGCGTATGGCAATGAGAAGTTCGAGACACTGTCGTACCTGCCGCCGCTCAGCACCGAGGACCTCCTGAAGCAGATCGAGTACCTCATCCGCTCCAACTGGATCCCGTGCCTCGAGTTCAGCAAGGTCGGCTTCGTCTTCCGCGAGAACGCCAGCTCCCCCGGGTATTACGACGGCCGCTACT…	gz_contig_1520	100	821	gi|357154841|ref|XP_003576920.1|
aj_contig_934	GCAGCGGCAGCTACTCTTCTACTAACACTTGCCCCAATGCTAAATCTATCTCGCAAAGCTGCAGCATCATTCAGACCATCTCTAGCACGATCAAGCCCTTCAGTTAAATATTGGCTCACTTGATCAAGCAAGCATGCAAAAATGGATCGTACATTAGCTGCAATAGTAGTAGACTGAGAAAACAACAGCGTGCATCTGGATATGGCTTCCTCATTCCAGCGAACAAACTCCGTTACTACAGTTACTGATATCTGCTGCTGTGAAGCTGTAGTTAACGATGCACCTTTTGCACGTCCGATTGAGCCAGTAGACTCAGATTGTTGCTTGGCTTCAGCTCTCAGTATAGTCATCTTTGATTGATACAGCTGTCTGAGTGATGCCTGCTCAAATTCTGTGTAC…	gz_contig_6997	99.8	1478	gi|242085366|ref|XP_002443108.1|
aj_contig_935	GCTTGATATAGGGAATATTTCTAGATGTCACCCCATTAGCTGTTCTCGAGTTAAAACTTGGAAATGGCAATAATTCTAAGCCAATAGAGCAGTAAACCTCAGATCCTATCAACCAGCGTCGCAAGACTAGGAATTCCTATATGTACATCATCTACCAACGAACTACGAAGTATAATAATCAGAATGGGCTAACAAATACGCCACATGTCAGTGGTGGGCTGTCTTCAGAACCACGGGTGCCATGTCGGGTCCATCATGCATAAGTTCCTCGAGGATAATGCTGCTTCCACCAGATCTGTGACACCTCTTTGCACCGACTGAGGTGGCTCAGTTGCGTTCTCCTCCTCATCAGCAAGGTAATGTGGTGATATCGACTTGATGCGACCGATGACATTTTCC…	gz_contig_806	99.96	6932	gi|242051078|ref|XP_002463283.1|
aj_contig_936	CCCCTTGAACACTGACTTCTACCACTGGAGGAGAGCTGCGAACCCTTCTTGCTGGTTTTATCCTGTGATATGCCCCGATACAAAAGTTCCGCAAAAAAAAGTTGTTCCTTCGAGCCTTCCTTGATAGACCTTGCAGTGAAGTTAATATGCGTATAACAACAATGCGGCTCAGGCACACTGGTATATGGTTTGACATCTATGAGCTCTAACTTGATCTTCTTCCTTCTGTTGTAGTGTGCCAAAGCAGCCTCTGCAAATTCGTTGGACCGTTTAAAAAGAAATTTTGGATTGGGCCGAAGAACATGCAAGTTTTTTCTATCAGAAGTCATTCTCCT	gz_contig_10456	100	332	gi|222631962|gb|EEE64094.1|
aj_contig_937	AGAGTACGGTTTAACCCCAGGAAACCAAACGTTCATCCATTTCAGTACAACAATCTAACATATTACAGGTAACCTAAAAATTGATCAACTTCTTGGTGATCCTTGCGTCTCTACCTCAGCAAAAAGAAAGAATCAGATGTTCAAATGGAATTACAGCAAAACCTTGACACCTGGAGATGCTTGAGCTGGCAAAAAGTGACTGGGATAAAGAACAGAGCCTACAAACTTCGGTAGTCAAGAACAGTAACCTCCTCGTCTGGAGCATCAAGGTCGTTGTAACTTCGTAGACGACGAGGATCATGACGAAAATTTGGAGGCATAGTTATAATTGGTGCCGGACCACCAAGCATTGGCCCAAGCACTCCTGTATTCCCATGCGGTACACCATTTGGCTCAAAT…	gz_contig_7571	99.82	1676	gi|242096910|ref|XP_002438945.1|
aj_contig_938	CAGCCGCCGCTTCCTGTAGACACCTCATCCTTTCCTCAGACCACCCGCCCCCTCCTCCAAGGATTTCCGCTCTTCGACAAATCGCTTAATTCTTGACACCATGGGTGAGGCGTCGCCGGCGATCGCCAGGGATGTCACCGAGCTGATCGGGAACACGCCGCTGGTGTACCTCAACAAGGTGACCGAGGGCTGCGTCGCGCGCGTCGCCGCCAAGCTCGAGTCCATGGAGCCCTGCTCCAGCGTCAAGGACAGGATTGGGTACAGCATGATCACTGATGCTGAGGAGAAGGGGTCAATCACTCCAGGAAAGAGTGTGCTGATTGAACCAACTAGTGGCAACACAGGCATTGGGCTGGCCTTTATGGCTGCTGCAAAGGGCTACAGGCTTATGCTCACGAT…	gz_contig_2125	98.87	1061	gi|219888503|gb|ACL54626.1|
aj_contig_939	CCCACTTACCCACGCACACCTCGCCGCTCCAATCCATCTCCGACGCATCTTCTCCCGGTCGCCCGCCGCCACCGCCGTCGTCTTCCTCGGAGCCATGGGTATCTTCGACGCTCTCTACCGCGTGGTGATGCGCCGCAACGCCGTCTACGTCACCTTCGTGGTGGCCGGTGCCTTCGCGGGCGAGCGGGCGGTCGATTACGGTGTACACAAGCTGTGGGAGATGAACAATGTCGGGAAAAGGTATGAGGATATATCAGTGTTGGGACAGAGGCCGGCGGAAGAATAAGAAGACTCCCAGGTTCTCGCTTTTGGTGAAATTAGACAAGCATTAAGAATCTGGTGTTATCATTTTCCTTTTGACACAATAAGGGATGTATAATTCCTAACTTCATTTCTGAG…	gz_contig_7039	100	497	gi|413924803|gb|AFW64735.1|
aj_contig_941	CTCGGCGGCCCGGGGAGCCGGATTGCAGCTACTACGTGAAGTTCGGGACCTGCCGCTTCGGGACCAAGTGCAAGTTCAACCACCCGGCGCGGAAGAAGAAGAGCAGGGTGAAAGGGAGTGGAGGCAGCGGCAGCGGCAGTGGGAGCAACAGCAGCAGTAATAAAGCCTCTTCGCCGAAAGACGATCAGGCTCCTAAAGAAGAGTATGAAGGTCTTGCTCCAGATATTTCAGATTCTTCGGGGAGCGCATCTAACTCGATTCAGGGTGCTGATGACAAGGGGTCTGAGTATACCTCAGAAAATTATAGGAAGACGTCAAATGAGATTGCTGCAGAGCCTGAAAACGAATCGTATTCTAAGAAGTTAGATGAGACAAATGTCACCAAGCATAAGATTCCGA…	gz_contig_3691	100	1349	gi|242083372|ref|XP_002442111.1|
aj_contig_942	CTAGGAAGACCAAGAAGGTTGCAAGTGTTAGCCTTCTTGGTTTGCTGTTTATTGCACTTGTCTTTGGTGCTTTTGTTCCTGGGTTCAATCACAGTTTTGGCATGAGAGGTGGGATCGACAATGTGATGTTGAGAAATGTTGGTCATTCTGATGCTAGGGTGTTTGGTGTCACTAACTATGGTAAAGGATCTAAAGTGGGTTTAAATAGTAGTGACGTAATCAGTAGTGATCCTGGAATGATGAACAATGGAGCTGAACAGAAGCCTCGACCTGCACATAATTCTAGTGAGACTTTGCCTGCTTTGTTGTATGTGCCGAGGAATGGAAAGCATGTTAAGATCAATGGAAATTTGATTATTCATTCCGTGCTAGCAAGTGAAAAAACAGTGGCACATGAGG…	gz_contig_4831	100	1358	gi|242090527|ref|XP_002441096.1|
aj_contig_943	CCCTCCTCTATTTTCCGCTTCTTCACCTTCGCCCAAACACAGCCGGTTGCGTTCTCAGCCCACCAACCCAGCTTCTCCCTCATCCTCCTACCGCACGCCTTGTCAGATCACCGGCCGTGCGAAAATCCAAACTTTTTCGACAGGGCTGGAGGACCCTGCTCCTGTTGCTGCTGCTTCTGCTGGGGGTTCTTGTTGAGCTGGATTGGCCTGGGTCTGTGAGCCTCTGAGGTGGGTGATGGCGGTGCTGCGGTTCCATGGTGATTGATGGTGGCGGATGGAGAGTACGAGAGGAGCGGCANNNNNNNNNNNNNNNNNNNNNNNNNNNNNNNNNNNNNNNNNNNNNNNNNNNNNNNNNNNNNNNNNNNNNNNNNNNNNNNNNNNNNNNNNNNNNNNNNNNNN…	gz_contig_6899	100	881	gi|242059025|ref|XP_002458658.1|
aj_contig_944	TCCCACAGGTTTGAGGCTGTGATTCACTTCGCCGGGCTGAAGGCTGTTGGCGAGAGCGTGGAGAAGCCCCTGCTCTACTACGACAACAACCTCATTGGCACCATCACCCTGCTTGAGGTCATGGCCGCGCATGGCTGCAAGAAGCTGGTGTTCTCTTCATCAGCAACTGTCTACGGGTGGCCCAAGGAAGTGCCATGCACGGAAGAATTCCCCCTGTGTGCCACCAACCCTTATGGCCGAACCAAGCTTGTCATTGAAGATATCTGTCGCGATGTGCATCGCGCAGACCCTGAATGGAAGATCATACTGCTCAGATACTTCAACCCTGTTGGTGCTCATCCAAGTGGACACATTGGTGAAGACCCCTGCGGAATTCCGAACAACCTCATGCCATATGTC…	gz_contig_1592	100	1088	gi|223945199|gb|ACN26683.1|
aj_contig_945	TCTAAAGCTTGTGCGTGCCCTTTGGGGTATTAGGAGATTGTGGTTAGCATCTGTCTCTGGCTTAATAAGTGGTTGGTCAGCACCGGTTTTTGTTCTCCGGATATTGGAGAGAGATTTTTATTATCTCTTGGCTTCTCTCCTTTCTCTGGATTGCTCTTCGCGTTGGCGTGCGCGTTCGGGTGGATCGGGATGGGGGNNNNNNNNNNNNNNNNNNNNNNNNNNNNNNNNNNNNNNNNNNNNNNNNNNNNNNNNNNNNNNNNNNNNNNNNNNNNNNNNNNNNNNNNNNNNNNNNNNNNNNNNNNNNNNNNNNNNNNNNNNNNNNNNNNNNNNNNNNNNNNNNNNNNNNNNNNNNNNNNNNNNNNNNNNNNNNNNNNNNNNNCGAGTACGCCGCTTCTTTTT…	gz_contig_6531	100	2300	gi|222641636|gb|EEE69768.1|
aj_contig_946	TGTATAATATACCCATTTTGTGTTTGCCTACTTATGTTGATACAACAGCTGTATTCTCACTCTGCAAAAAAAATAATCACAAGGACAAATATCAACAATTAAACCTTTGCTTGCCACCCTAATGCTGCTTTCAGTGCTACATTTTGTATCCGAATTGTGAATTAGATCTGATGGTGCTCCAGGATGATTAGGGACTGACAGCAACTGAATCTACATTCTGCAGGAGCATACACTAGGGCAAAAATTTGGAGCATTCCTTCCCATTATATGTCATCATTAGCTTTGTGTTTGGCGGTGAATTTGTAGCATCCAATCGACATAACTGCTTGTTCCAGCCATCTGGTCCTCAACAAGGTTAGAGAGAAGCAAAAAGCCTTCTCTTGGCTGTTCACCTTGTCG…	gz_contig_2306	99.87	2351	gi|242072254|ref|XP_002446063.1|
aj_contig_947	AGAGGTCCGCCGCCACCTCAGGGAGCTTTCGGCACCGCGCCGCCTTCCCAGGGCCCGTTTGCTGCCGGGGCACCACCTCAGGGTCCCTTCACCTCCGCAGCACCGTCTCAGGGCCCCTTCATGTCCGCACCTCCGTCCCAGGGCACTTTTGCCTCGGCACCACTGTCACAGGGTCCTTTTGCCTCGGCGCCACCATCTAAGGGCCCCTTTGCCTCCGCTTCACCGCCTCAGGGTCCCTTTGCTGCTGGACCGCCTCCTCAGGGCCCCTTTGCTGCTGCACCAGCACCCTTTCTCACTCGGCCATCATCCTTTTCGCAGCCACAATCTCCCACGCGAGGCGCTGTACCTCCACCAGCTTCGTATGTGAGGCCGCCACCACCTGTCCAGTCGCAGCCGCCA…	gz_contig_2304	100	2357	gi|242072254|ref|XP_002446063.1|
aj_contig_948	AGTCACCTGACTTTTTAGGTTAAAAAGAGATCGAAATCAAATCAGATACTAGAATAAGAGAGACGCCACTTCGGGGTAAACAACACACCATATTTTCTACGCACAAAGTTATTCGGAAGTACTTCAGATTAAAAGCATAGGTAGATAGGTGTCTTTGCTACATCCAAATAGCGCGTAGCATGGTAGCAAGCCAAGTATTAACTTATACCCAAGCATTCTACTGCAGCTTCACATCCTTGCTACCTATATGTGGCAAAAGATGGAGCCTAATTCTACTAGTAGTAAGGCCAGGAGGACTACTTGATCAGAGTCTACTCCTTCGAGGCATGGATGGCAGACACGGTGGAGACCATGGAGTCAACTCCGCACTTGTTGCGGACATGGGAGCCCCTGCAAATC…	gz_contig_1495	99.53	1283	gi|115446097|ref|NP_001046828.1|
aj_contig_950	GCCTTTGGCAGGTTTTAGAATCCTTCCAATGCAGGATCCAGTGTGAGCTTATTAAAATGGGAAAATTCAAATAACTTTTAGGTGACTCCACTGCTCTATCTATTTTCGCACCTAAACTCTAGAGCAGCTAATAACAGCAAAACTGTTGAACCGATTCCGAAATTCAGCACACCAATCCCCACTTTCTCCATTTCCGTGTAAGAACGAAGAAACGAGAAGAACCACGCCCCTATGGGCTCATTGCCGTTCAAAACACATTTTGCACGCGCGCAGGTGCAGGCTCATCTGCCATTTGCTGCTGCTGCTTCCTCTCGACTTCCTGCGTCAGAGCCTCCTCCACGGCCTTCTCCACGTCGGACGCCGCAATCGTGGTTTCGATGTTCATCTCCGTCCACAGCC…	gz_contig_32914	97.32	335	gi|414872703|tpg|DAA51260.1|
aj_contig_951	AAACAGCGGCTGGTGCTGGATGGGCATGAGCTGGCGCGCAACAACTGCCCTATCAAGGATTATGGACTGGCAGAGGGAAATGTTCTCCACCTTGTGATTCGGCTGGCTGACCTTCGGGTGATTAACATTGAGACCACAACAGGAAAGAAGTTCCAGTGCCAGGTGGACCAAAGCCGCAACGTCAAGTATCTCAAGAGCAAGCTTGCAGCAGAGGGTGATGAGGATATTGGTAACCTGGAAGACCACAAGCTTGAATATGATGGTGAGGTGCTTGAGGACCACCAGCTGATTGCGGATATTAGCAAGAAGGAAGATGCTGTGATTCATCTGTTCATCCGTAAGCCAGCAAAAGTACAAACACAACAAGTTGATAGAGATACTCTGGTTACAGTTCTCAAC…	gz_contig_582	100	1604	gi|242093094|ref|XP_002437037.1|
aj_contig_952	CTTATTCCGCCACCTGTAAATCATCACCAAAGCCGGTGTCGCAAACCCCTGGTGGTCTCTCAGATCGGATCGCTCTGCTCATCCGGTGACATCCCTCGCCATGGCGGCGCTGCTGCTTCGTAGGCTTGCCGGGNNNNNNNNNNNNNNNNNNNNNNNNNNNNNNNNNNNNNNNNNNNNNNNNNNNNNNNNNNNNNNNNNNNNNNNNNNNNNNNNNNNNNNNNNNNNNNNNNNNNNNNNNNNNNNNNNNNNNNNNNNNNNNNNNNNNNNNNNNNNNNNNNNNNNNNNNNNNNNNNNNNNNNNNNNNNNNNNNNNNNNNNNCTGCGCATCAAATCCCCCCACCGTAGCGCACATGGAGAAGGGCGAGGAAGCTGCCGACAAAGTTGCTCTTAACCCAGACAA…	gz_contig_2689	100	1010	gi|218187601|gb|EEC70028.1|
aj_contig_954	GTCTGTCGATCGACGTCACATTCTGGATCCGTCTCGTTTCGCTTCGACCCAGATCGACGGGATAGAAAGAGAAGAGGAATCCAAGATCCAATCTTGCTGCTGCCTGCGACTCGATCCGATCGACCTCGAGTGGAGCAGCGTCCATGGCTCGCCGCTATCTCCTTCTTCCGCTCTTCTTTGCCGTGGCGGCTGCTACTGCTGCTGTTTCGGGGCAGGTTCATGCAGAATCCTCCGCTGTCTTCATCGACAGCGCGTCACATCGCTACCTTCGGAATCAGCAAGGCGACGACCAGGACACTTCAATGTCATTAAATGAAGTTTCTGCGGCAGTTTCTGTCTTGCTTGGTTTTGCATCACCAACCTCCCTACTCGCCCGTTCTTCCGCACAGTTAAACAAAG…	gz_contig_454	100	1571	gi|414869960|tpg|DAA48517.1|
aj_contig_955	CGTTGTTCTGTGAGCGCGCTAGATGCCAAGCACCATGAAGGAACTATGGCCGGCCTTGTCCATGGTGGCGATCCAAATCTTCACCACCGGGCAGATGCTGCTCACCAAGGTTGTGGTCGATGACGGGTTGCCAGTATGCAGCCTTATCACCTACCGTTTCTTCCTCGGTGCCATCTTGGTCCTCCCTTTAGCCATGCTGCTTGAGAAAGGAAAGTTGAAGGAGCTAAAACTGAAGGCATTCATATGGATATTTACAAGTGCACTTGTGGGATTTACAATTCCCGGTCTGTACTACATTGGCCTGGGAGACACTTCGCCCGGATACGCCATCAACTTCTACAACATCATCCCGATCGCAACATTCGTCCTTGCAGTGCTCTTCAGGAAGGAGACCCTGAA…	gz_contig_1560	98.13	641	gi|22795291|gb|AAN08263.1|
aj_contig_956	GCTTCACGCCTTGATTTGATAGCTAAAATCTCTGGTCTTCACAAAGCCGAACAATACATTCAGAAAATTCCTGCAGCTCATAGGGGTGAGATTGTATACAGAACACTTCTGGCTAACTGTGTTTCTGAAGCAAATGTCAGAAAAGCAGAGCAAGTCTTCAATAAGATGAAGGATCTTGGATTGCCAGTAACAGTATTTGCTTGCAATCAGCTTCTGCTGCTCTACAAAAGGGTGGACAAGAAGAAGATAGCTGATGTTCTCACATTGATGGAAAAGGAGAACGTGAAACCATCCCTTTTCACATATAAGCTCCTTGTAGACACTAAGGGAACCACAAAAGATATAGAAGGCATGGAGAAAGTCATTGAATCGATGCAGGCAGAGGGTATTGAGCCAGAT…	gz_contig_6093	98.62	1307	gi|125525413|gb|EAY73527.1|
aj_contig_957	AGAGAGTACATAGCTTTATTGCGCCACTGTTAAGTGGACCTATTTATAACTTATCACAAATCTATTTGCATCGACTATGTTAACTGGGTGGGCTAATACAAGATGAAGCTCAAATATGAGGAACAGGGTGCTTTTGCTTATGCTAGGACAACATCACCACTACCTATTCCTTGCAAGGGCTGATGGTGCAGTTTCTCTTCAAAGTCCTCTAAGTACTCTCTACTGTTGATCTCTGTCAACCTGCTAATGGTACGATCCTTAGCAAATCCAAGCTCGTTGTCCACACATAGGTCAGGATCGTCGCTTTTTTGAGAACGTGAGGATCGTGGTGAATTTTTTTGAGCTTCAGAAACCGTCACTATATTCTCAAATAGTTCTATTGGTGCAGCTTCAGCTGTG…	gz_contig_9694	100	1757	gi|242078731|ref|XP_002444134.1|
aj_contig_958	CGGGCCTGTTTGGATGCCGGCCACACTTTGCCACGCTAAAACTTGCAGCCTGCCGCAATAACTTTGGTAATTGTTTACTTCACTGCCGAACTTATGGCGTGCCTCGTGATCTTGTTTTGTAGAAACTCCGAAGCCTCAGGATGCCAAGTTACAACACCATCTAACCAGTCTAATGAAAAGAGCTCAATAGAAGCAGTGCTAACACACAAAACAAAAATGTTTGATAGTGGCCTAGCGTTCATCTAACTCGAAGCTGGAATCGGTTGAAGGGCCTTCATGGGATTCATGATCACTCCATCAATAAGACCATACTCTTTAGCCTCCTTTGCACTCATAAAGTAGTCACGGTCTGTATCTACATTGATCTTATCTAGGGGCTGTCCCGTGTGGTACGCCAGG…	gz_contig_4459	99.47	563	gi|297600816|ref|NP_001049902.2|
aj_contig_959	CGGCGCACATCAACTCCATGTCCCGCTCGGAGATGTACGACTTGATGTCCCAGTTGAAGAAGCTATTGGACCATGACCAGGAGACGGTGCGCCGGATACTCGTCGACAACCCGGAGGTCACGCGGGCGCTCTTTCGGGGGCAAGTAGTTCTTGGGATGGTGAAGACACCTAAAGCTGCACAATCTTCAGACATTACGCAACCTGCAGCAGCACCAGCTGTAGCTTCATCAGTTAAACAATCAGCACAAGATCATGTTAGCTTGCCCCAACCCCCATTACCTTCATATCAGCAAGGTGCTGCTCCACATTCTGGCGCATTACCATCTGCTGCGTCCAATGTGGCATCGACCATGGACCTCCCTACTGTGCCAGCAAACCCACCACAGTCCGTACAGGCAA…	gz_contig_2071	100	725	gi|413946033|gb|AFW78682.1|
aj_contig_960	CAAGACTTTGTGTTTTACGAACCACTTTCGCCCTACCCCTAGAAGTCGGCTTAACAGATTTTTGTGTCGGTTCAACAGTGAAAGATTCATGTAACTTTGTTCCCTTTCTCACCCACCAAATATCTTCCTCTTCTGATTGAATCAATGGTAGCCCTTCAAAAGGAGAGACACTATCATCCAATTTCTGTCCTTTGGACCTCATACAATCCTCACAATTTTTCCCTTCTCCGGTGCTAACTTGTGATAGTGATGAAATAGATGACCCTTGAAAGTCTGTTTTGATTTGGCAAGATTCTGATTCCACTGGGTGAGGATACGTAAAGCAGAACAGACCTGACACCAACGCTTTTACATCTTCTACTTGTTCTGCCACCCTTCCATTCTTATCACCTCCTGATG…	gz_contig_4482	100	1745	gi|242037259|ref|XP_002466024.1|
aj_contig_962	TCTGCTTTCCGTTTCTGTAATTCTTGCTTCCAACTTGGTTGTTTGTAGAAAGCATCCTTAGTCATGCCAAATACATTTTGGAATTCGCTATCTGATAAGTACGCCTCTCTACGTTTGTAGTCTATCCCACGAACCGGATCAGTAGATTTGGATATCAAGCGGTCATAGCTAAATGTTGCTTCACCCACATTCTCTGTTGTTTCTTCCTCTGGGGCCTCAGAGTCTTCTCCATTAGTCTCCAATGGCGCTGCATCAGCTGCAGCATCTTTCTCTTGGTGAAATACAGAGGGCTCCCCAGCTTCAGACTGAGGCGAAGATGCACCAGATGGTCCAGATGGAGTTATTACAATCCTGTCAGCATCACTCTTATCTGCTGTGCTACTAGTCTTGCTAGCTCGT…	gz_contig_4939	100	2183	gi|242055587|ref|XP_002456939.1|
aj_contig_964	ATTGTTCACAAAAGATACAGCTCAGATGAACAGCTCTGTTGCGCACAAACTCGAGTTCTAATTATACAGCCCCGAAGGTCTCCTCCATTCTTGCCAATCTAAGACCTCGGCTTCTCCTTCTTCTCCTTGAAGAGTGCAAGCAGTGACACACCAGATACCTTCACAACCTTGAACCTGACACCAGGAATATCTCCCACGGCGTGCCCCTTACGACCAAATCCGGCAATCAGCACCTCATCATTTTCCTCGATGAAGTTCAGGCAACCATCATTTGGCACAAAAGCAGCAATCTTCTTCCCATTCTTCACCAGCTGCACACGAGCACACTTACGGATGGCAGAGTTCGGCTGCTTGGCCTCAATACCAATCTTTTCCAAAACAATGCCCTTGGCGTGGGAT…	gz_contig_6637	97.84	554	gi|125572544|gb|EAZ14059.1|
aj_contig_965	TCGGTAATTGCAATATCATGTCGAGTAGTGGCAGTGATCATCCAGCCCAATAAAGGCAGAAGGCCCATTCTCTGTGGGCCTTGGCTTTACCTCTCTCAGCTGGAGTACATAGCACACCTAAGTGTGGCCCAACTTGGTTCCACCTTTCTCTAGTCGTTAGCGCCATGAACCAGCTGGAACGGACGCTTCTCTTCTCAAGGACGCATCTTGTACGTACAGACGACACGACGCCGTAAAGGCGAAATATGCGACATTTATATTTTGTGCCAAACAACAGGGCCTGGCAAATACGTACATTATCCACATCTCCCTCTTGTAAACATATTAATTAATCGTCAAACAGAATTCACAACACTGGCACAGACACGAATAAACCACACACCTTGCTCTTGGACAGCA…	gz_contig_32406	89.47	170	gi|242036063|ref|XP_002465426.1|
aj_contig_967	GATACATCTGAATGACAACAGAATGATGACCTACAGGAAATGGCCATGCGTAACAAACGTGTAAAAAATATACACATGGACAGTTCATAAAGCAAGATAAAGCAGAGAGAGCATAGGACCTCGCGAAAAGCATAACCAAAGCCATGTACAAAAGAATCTAACCTATAAAATTTGCAAAACCAACTGGCCAAGCCACCAATAGCCATTCACAGAGAGTGACCAACCATAGAATAGACTCTCATGAGACCAATAATGAGAAGGGGGTCTAATTTTGTAGCAGACACTAGAAATCTAATTTTGTAGCAGACACTAGAAATACTCTTGTTCAGGATCATGGCATTTCTAAAATAGATCTGCTTTCCGTTTCTGTAATTCCTGCTTCCAACTTGGCTGTTTGTA…	gz_contig_7146	100	2030	gi|242055587|ref|XP_002456939.1|
aj_contig_968	AATCAATTAACACAACACACTTCATAAAACAAATATTATTAATATGCTCTGACAGACATCTCTCAAATACATATGCTCATTGTGGTAGACGCAGCAGACCACCTAGAGCTTTAGTAATTATATTCAGAATATAAACATATGCTGCAACATCACAACACATGCTTACAGATGATTCTTTTATTACATAAATAATAAAATAGCCTTGGCTTGGCTGCTTCACGGAATAACCAACGACCACGACAATCAAAAATCAAATAAAAACTCGGCAGCAAATAGATAACAGAGGTCCATCTTACTCATCAAGCACTCCGTCCTCCTCCACGACATAATCTTCCCAGGAGAGAAGATTAGCCAGTTTACCATTCTTGGAAAGAACAACATTCTCCGGTTTCTCGCCCT…	gz_contig_1630	99.81	1601	gi|288300150|gb|ADC45378.1|
aj_contig_969	TCCTATCCCTTGCTTTCGCTTCCAGGCTTCCGTCCCCTGCCTCCATCATTGATCTCAGTCAGACCCTCCGCGCCCGCTGCTCCTCCCGCAGCCGCTGGACGGACCTCCAGGAACTCTGGCAAAGTGGAAGAGAATTCCATACATACACACAAATGGCCCTCAAGACCGTGCAAGCGTCATCAAATCTAGCTAGGCCAACAGGCAGCTACAGTTTCAATCCATTCTCGCCTCATTATAAGCCACAGAAGCTTCCAGCACACTCTAGAATTTCCACGAAGAACCATCAGAGGAACAGCGTTCCCACGGTCCTCAAATGCAGAGCCAATTTGCACGGCTGCGTGGACGAGGTCGTCCAGNNNNNNNNNNNNNNNNNNNNNNNNNNNNNNNNNNNNNNNNNNN…	gz_contig_21367	99.12	338	gi|242035509|ref|XP_002465149.1|
aj_contig_970	GTTAGAGTCAACTTTGGTTTGAAAATCAGTTCATCCCACTCATTCCCACTCTTTTCAGCCTGTAACGAAACCATAACTGTCAGGTGTTGGAATGAAATTCAGCGATGAGAACAATGATAGAGTAGAAAAAGAGATTCAAACCAATACTTTAACCGAACACATGTATTCAAGAGATGGATTAGAGCGAGCCAAGATTCAATCAACAATGGGTTTGAGTGTCAGGCATGAAACCACTCAAAGGGAATTAATCCATGGGTGCCGAACAAGGCCTCAAGGGGTATCACGGTCCATTGCTCGGGCATCGGATGGTCATTAACGGGAACATGGTCACAGCAGAAGTTTTATAGCACCTGCTGAAGATGCTCTAACTAGGTAGAGAGCCGCAGCATCTTCAGAAAC…	gz_contig_30706	100	554	gi|354604509|ref|ZP_09022498.1|
aj_contig_971	ACGCCCCGCGGGTCTCCCTCATCGTCCACCCCTTTCCGCTTCCGTATCACACCTATGCATTTCATGCCTGCCGTGCACTGTACATTGCTAACAAGTTGAACACATCATCAACTTATCCATTACTGGAGTTGTTCTTCAAGAACCAGGCAAAGTTCTCCAATTCTGCGACATCCTCGCAACCAAGCACAACTGTAGCTATGGAAATGTCAAAGATGGCAGCGCAGACCGTCGGTAATTCTGTGTCCGAGTTCCTCTCAGGCTTCAGCGATAGAAGAACTGACTTGGCAGCAAGGGTTTCCTTCAAGTATGGGTGCACAAGGGGAGTCGCCGGCGCGCCNNNNNNNNNNNNNNNNNNNNNNNNNNNNNNNNNNNNNNNNNNNNNNNNNNNNNNNNNNNNNN…	gz_contig_9573	100	335	gi|242050028|ref|XP_002462758.1|
aj_contig_973	TAAATTTATTATCTAATCCATCAAGCTTATCATGAAAGAAATAACTCAATCACACACCCATGAAAAATTTGTTTTGCACACTAGCAATATATATACAAGTATCTTCGACGTCACAACATTCCAATGTGATGGATGTGAAGAGAAGCTTCACTGATCCTGTCTACTTGAAGAGTACTTTACAAAATACACACACAGTACAACAATATACATGTTCGAAGGTGAACGCAGTTTTATCACTTCGGTGATTCTGGTTTTGTGCGGCCAGGCTTACCTGTGATAGCCTTCTTAACTTTCGCTAGTTGGTGTTTTACCTTTGATCCAACGCCAGACAATAGGTTTTGTTTTTTATGTGCTGCTTTCTGTCCTTCTGCTGGTGTCTCAGTTTTCATTTCTTCATTG…	gz_contig_1763	98.34	5072	gi|242063934|ref|XP_002453256.1|
aj_contig_974	CGGGTTTATGAAGGAAAGGAACCTATCGAGTTTTTCCCAATATTTCAGAATTTGGTTATATACAAGGGTGGTACAAGTACTTGCTACAAGAAATTTGTCTCAGAAAATGGCATCGAGGATGACACCTATTCAGAAAATGGGGTTGCTCTTTTTCGAGTTCAGGGTTCAGGACCAGAGAATATGCAAGCTATCCAAGTTGATGCGGCAGCATCATCACTGAACTCTTCTTATTGTTACATACTACATGATGGAGATACAGTTTTTACATGGATTGGTAATCTAAGCTCTTCGATGGACCAAGAGCTTGCTGAGAGGCAGCTTGATGTGATCAAGCCAAACCTTCAGTCCCGATTGCTTAAGGAAGGTTCAGAGTATGACCAGTTTTGGAAGTTACTTGGT…	gz_contig_3540	99.62	1592	gi|218198689|gb|EEC81116.1|
aj_contig_975	CTTATATATTACTTTGTCACTGCAAGGAACAACATAAATTCAAATAAGATGTGTAGGATCTTAAGATTACTAAAGCNNCGTTTAGTCCAAGTCAGAACACAATACAAGTTAAAGTCAGACCATGGAACAATCAGTGAGCTAGTCATTCACAAACCACAAGAGATTGCACATACAAGAAACCCGAAGCTTTCGGATCATGAATGTTAGAAGTCTCCCAGCTGAAATATGCATTTCACCAGTCATGTTGTGGTCGAATGCTGGTACCAGTGCACACCACTTATATATTACTTTGTCAATTGGAGGTTACAAATGAAGCCCTCCATGAAAACAATTTCAGTATTTTGAAGTCGATATCATCTCTCTTAGAATGTCGGCAACTGCATGATGACAGAACATGTA…	gz_contig_5334	98.24	1022	gi|242070297|ref|XP_002450425.1|
aj_contig_976	CACGTCCCCGAGGAGCGCAAGGCCGCGGAGGCCAGCCTCGACCAGCTTCAGTACACGCCACAGCATCTGGTGAGATTGTTACAAATCATTGTCGATGGAAACTGTGACATGGCTGTGAGACAAGTTGCAAGTATCCATTTCAAAAATTTTGTTTCCAAAAACTGGTCCCCTGTTGATCCTGATGAAGGGCACAAAATACCAGAAAGTGACAAGTCCATGGTCCGTGAAAATATACTGGGCTTTATTACACAGCTGCCTCCGCTTCTAAGAGCACAGCTCGGAGAAAGTATAAAGACCTTAATCCTTGCGGATTACCCTGAGCAGTGGCCTAGCCTTCTACATTGGGTTACACATAACCTAGAAAATCAGGATCAAATTTTTGGAGCTTTGTATGTGCTA…	gz_contig_3778	100	2705	gi|326517242|dbj|BAJ99987.1|
aj_contig_977	TGAACCGATACATCGCCGGGGCAAAACAATTTATAGAGCTACTATCAGCCTTCACAGTTACAACCAATCAAACCAACCAAGTTCGATAAGTAACCTCACAGAATGAGGTCGCAGAGCAACAAAATACTATTCGTACAGCATGCAGATAACTGGAGCAGCCACACATATAAGTGGCCAAAATAAGGACTGTCTGCAAAACACAAACACAACCTCCCTCCTCTCCATGAAAAAACCCCAACAATGGACTACACCAAAGAGATCCGAAGCGGCACTTAGAAGCACTTCCTGTGAACAATTGCTGGACCAGACTCGTCATACTCATCCTTTGATATCCACATCTGTTGGAAGGTACTGAGAGAAGCTAGGATAGACCCTCCGATCCAGACACTGTACTTGCGC…	gz_contig_1736	98.8	1502	gi|284157808|gb|ADB80031.1|
aj_contig_978	CGTAGGGTGTCACAGCATAAGTACAGAGCTGGACCAGCATTATACTCAAATCTCCATGGTAAGCATTAGAATAGTTGCAATACCAATAACAATGAGCGTAGGGAGTCATAGCATAAGTACAGAGCTGGATCTAAAGGGCTCCGCAGCAAGGAACTGAAATTCTTCTACTTAGTCAGCTGCGGATTTATCATTTCCGTAACATGTCGCGTAGCTGAAGCACTTGCTGACGTTGTTCTGGAGGCAGCATATTGATCTGTTCCTGCGACATGCCCAACACTTGCTGGACAAGCATCTTTTCCATTTCAGGTGTCAAAGGTGCTTGGCCAGTCTGGATACCACCAATTCCTTGGCTCATTTGTCCGGGCAATCCAGGTAATTGTCCAGGGAAATGGGAGCCAG…	gz_contig_2070	98.83	512	gi|413946033|gb|AFW78682.1|
aj_contig_979	TAATCATCCATATACGCACAAATAAATGAATATTGGCAGTACTACACAGCCAACATCCCGTTAGCAAATATACATTTCATGTGTACATGTTCTTGAGAGTTGATCCAGCCAGACTACCCCCGGACTTTACTCTATTAGCACTCTGCACTAAATCATACTACAAAACACAAGATCAACCACACTGGAAACATTGGGAAAGGGAAAATCCCAGTGCTACAAATACAGAGCTAATCGCTCGAGTCTAATGCTCATCTGAGATGATCTCGTTCACTTTTATCTAAGCGACTACATCCGAGACTGAATGCGATGCATCCGAATCCTTGTTCTCATGAGTAGCCGGTTCCTTCATGGTTTCTAAATCTCTGCTCTCCTCAAGGTGAGCCACAAAGTCCCTGCTTT…	gz_contig_134	100	5360	gi|414886764|tpg|DAA62778.1|
aj_contig_980	CTTGTATTCGAACAAATTATTAAATTTAAAGCAAGCTAAGTGGAGTAGGATGCACATATAACATTCTACAACAGTTGCAACCCAACATGATCATTCCGCAGGATGCAGCACACTACGGCGCATAAAGTTCATAAGCATGCATCCAAGCTACAAGGCTAATTTGGTACTGCACATACAACAAAATAAACGGAAGAAACCGAAAACAGTTCTAACAGGGCTCTCTTGATTGATTGCCATCAGGCCTGCCGTCATCCCTTTCATAGTGCCTTTCATTGTCCGAAGGCTGCCTATCAAACTGGCGATCATTTCTCCCATTGTGATTGGCATATCGTCTCTCGTTGCCTGATTGTTGTCTATCCATGTGCCTATCGTTCCTGGATGGATTCTCCTCACCAGGAT…	gz_contig_1970	99.52	3776	gi|413952456|gb|AFW85105.1|
aj_contig_982	CCAAAACAATTTTATAGAGCTACTATCAGCTATAACCGATCAAGCCAACCAAGTTCCACAAGTGACCTCACAGAATGTGATCACAGAGCAATAAAATACTAGTACAACGGTAGCACGCAGATAACTGGAGCAAGCACACATACAAGTGCCCAAAATAAGAACTGTCTGCAGAACACAAACATAACCCTGCATATCTCTCTCCCCCTCCCTCCATGAAAAAAAAACCCACACATAGGACTACAATAAAGGAATCCGAAGCTGCACTTAGAAGCACTTCCTGTGAACAATTGCTGGACCAGACTCATCGTACTCATCCTTTGATATCCACATCTGTTGGAAAGTGCTGAGAGAAGCTAGGATAGACCCTCCAATCCAGACACTGTACTTGCGCTCAGGCGG…	gz_contig_1739	98.08	1403	gi|284157808|gb|ADB80031.1|
aj_contig_983	TGGGCCACCCCCGGCGTTGCGCCGGGCTTCTTCGACATGTTCGTCCTCGCCTTCGTGGAGCGGCTCTTCCGACCAACCTTCCGCAAGGACGACTTCGTGCTCGGTAAGAAGCTTGGGGAGGGCGCGTTCGGCGTCGTGTACAAGGCCTCGCTGGCGAACCCCGAAGCGGCTGAGAAGCAAGGGGATGTGGTTGTGAAGAAGGCAACAGAGTATGGCGCGGTGGAGATATGGATGAATGAGCGAGTTCGGAGGGCATGCGCTAGCAGCTGTGCTGATTTTCTTTATGGATTTCGTGAGAGAAAAACTAAAGGTAAGGGAGCTGATGAATACTGGCTTATTTGGCGTTTTGAAGGCGAAGATACTCTTTTCGATCTCATGCGAAGCAAGGAGTTCCCTTAC…	gz_contig_8589	100	1487	gi|115465267|ref|NP_001056233.1|
aj_contig_984	ATCTTCAACAGCTTCGAGCTCGTCCTCGACCCCGTCTGCGGGACCCTCGACCGCTGCTTCCTCGAGAAGAAGCAGGAGCTGTACAAGAAGGTGTTCCCTGACTTCTACGTGCTGGGTTGGTACTCCACCGGGAGCGATGTGCAGGACACTGACATGTTAATCCACAAAGCTCTGATGGATGTTAACGAGAGCCCTGTTTATCTTCTACTAAATCCCGCAATCAACCACTCCCAGAAGGATCTCCCTGTGACTATTTATGAGAGTGAGCTGCATGTTATCGATGGGAGTCCGCAGCTCACCTTTGTCAGATCAAATTATACCATTGAGACTGTAGAGGCAGAGAGGATATCTGTAGACCATGTCGCCCATCTCAAACCCTCTGATGGTGGCTCTGCAGCA…	gz_contig_7966	100	863	gi|242080083|ref|XP_002444810.1|
aj_contig_985	ATCTTCAACAGCTTCGAGCTCGTACTCGACCCCGTCTCCGGGACACTTGACCGCTGTTTCCTCGAGAAGAAGCAGGAGTTATATAAGAAGGTTTTCCCCGATTTCTTTGTGCTGGGTTGGTACTCGACTGGGAGCGATGTGCAGGACACTGACATGTTAATCCATAAAGCTTTGATGGATGTTAACGAGAGCCCTGTTTATCTTCTACTGAATCCTGCAATCAACCACTCCCAGAAGGATCTTCCAGTGACTATTTATGAGAGTGAATTGCATGTTATTGATGGGAGTCCTCAGCTCATCTTTGTCAGATCAAATTATACTATTGAGACTGTAGAGGCAGAAAGGATATCTGTAGACCATGTCGCCCATCTCAAACCCTCGGATGGTGGGTCTGCAGCA…	gz_contig_7965	100	761	gi|242080083|ref|XP_002444810.1|
aj_contig_986	GTGAAGCATCTTGCTCGTTTTTAAGTATGAAAGATTCGCTGGTTTTTTCCTTTTAGTTACTTTTTTTCTTTTATTATAGTCTATTCTCGTATTATTTTTCTCCCTCTCCATAGATTCTTTCAATGAAGAATTGTCTTCAATTTTTTGATTTTGACTTGCTTGAAATTAAGTGGATGCAGTGAAAAAAGAAGTTGAATTAGATTACTATTTCAATCTACTAATCTATTCTATGTAGATTCAAGATAATATAATAGAAAGAATCTAAAGTGTGGTAGAAAAAACTATATGTAGTTCTTTCTACCACACTTTAGGATTCCAACCAGATCCTTTCATTTAAGACTTGGATTTTTATTTTCTTTAATCCCTTTTTCATTTCTTCAATGATTAATTGGAATTCCA…	gz_contig_4748	100	719	gi|109156586|ref|YP_654205.1|
aj_contig_987	GAGGAAGACAGCGCTGAAAGGGATTGAGAGTTCCTCACCGTAGCACGCCGGATTTCGACGGAAAGGTTCGGCTGCTCTCAAAATTCTGATTTGTGGGGAAGCTTCAAAATCCAGTTGGTACAGTAGGAGTATGAGCGGGGATTTTTGGGGGAAAAGCAGGAGGAGGAGATGGGGATCCTCCTGGGCTCTGAGGCACGGCATGGGGCTCTGCAGAGGGGGCAGTCGCCGAGCTTGACGGAGAGGCGGCAATGGTTCTGGAATGGGAAAGAAAGAGAGGAGGTCGAACGGGAGAAGAGCGAGGAGGCCGAACGAGATGCCAGAC	gz_contig_6126	100	266	#N/A
aj_contig_988	AAGGTCTACTACTTCCCGCAGGGCCACATCGAGCAGGTGGAGGCATCGACCAACCAGGTGGCTGAGCAGCACATGCAAATGTACAATCTCCCATGGAAGATACCCTGTGAGGTCATGAACGTGGAACTAAAGGCTGAACCCGACACCGATGAAGTCTATGCTCAGCTCACTCTACTTCCTGAATCAAAGCAAGAAGAGAATGCTTCTAGCGGAGATGCTGCGCCGCCGCCGGCACCTGCGAGGCCACGTGTACACTCATTCTACAAGACATTGACAGCATCAGACACAAGCACACATGGTGGCTTCTCGGTGCTCCGACGCCATGCTGATGAGTGTCTCCCTCCACTGGACATGAGCCGTCAGCCTCCGACACAAGAACTGGTTGCCAAGGATCTACAT…	gz_contig_1088	99.15	2468	gi|357152133|ref|XP_003576020.1|
aj_contig_989	ATGGTACACAGGTATCGGCTTTGTGATGTTGTACATTTTATGTTACTTTTAAAAGGAGCAAGGTACCACACAATGAGGCCATATCATGCCTGAGCTAAGAAATAGCTATCCTAACAAAAACGAGGATGAGATGTCTACTCGATACATGTTTTGTTTACAGTTCATCATTTCTTCGTCTTCTTAGTTCTCTTTGTACTTTGGGGTTTCCTAGCACCCTTATTAGGAGCCTTTGCTGCAACCCTGGCCTTCTTCTGTCCCTTCCCCGCTGGTTTCTCAGCTTTTCTTTTGGCTTTCGGTTTAGGTTGATCTTCATCTTCATTGTTCTGATCATTTTGAGAAGCATGTAGTTCAGGAAGCTTGTCACCCTCTTCATCTGAATCAAATGTGAATCCATCAAGG…	gz_contig_10961	100	974	gi|218190056|gb|EEC72483.1|
aj_contig_990	CGAACTTGTCAGACACGTTAGAAAGTCTCTTCCTGCCATGTTCTATCTTTAGTTGTCGATACAAAATTATGATGATACGATAACTACACCTTTACAAAAAAATATATTTATATATGCTGACCAGGGATCATTTCTTCATGCTTATGTACACAAAGCACGAAGCATCCAACCAAAACATAATGAGGTCGNNNNNNNNNNNNNNNNNNNNNNNNNNNNNNNNNNNNNNNNNNNNNNNNNNNNNNNNNNNNNNNNNNNNNNNNNNNNNNNNNNNNNNNNNNNNNNNNNNNNNNNNNNNNNNNNNNNNNNNNNNNNNNNNNNNNNCGACCGCCGTCAGCTTATTGACACCTTCCATCATAACGAGGTACCCACGGTAATCACAGATGTCCCAGGCTTCGAAAT…	gz_contig_4159	99.9	2990	gi|242040921|ref|XP_002467855.1|
aj_contig_991	GCCGCATCGATCTGCCTCCGATCCTCTCTTCTCCTTCGGTAGCTAGCCAGGCAGAGAAAAAAACACCAGCGACACATGGCGCCCACCGTGATGGCGTCGTCCGCCACCTCCGTCGCGCCCTTCCAGGGCCTCAAGTCCACCGCCGCACTCCCCGTCAGCCGCCGCTCCAGCGGCGCCCGCTTCGGCAACGTCAGCAACGGTGGACGGATCAGGTGCATGCAGGTGTGGCCGGCGTATGACAACAAGAAGTTCGAGACCCTGTCGTACCTGCCGCCGCTCAGCACCGAGGACCTCCTCAAGCAGATCGAGTACCTAATCCGCTCCAACTGGATCCCGTGCCTCGAGTTCAGCAAGGTCGGCTTCGTCTTCCGGGAGAACGCCAGCTCCCCCGGGTACTAC…	gz_contig_1530	100	824	gi|333776970|dbj|BAK23964.1|
aj_contig_992	TGATTATATTGTTGAACAATGACAAGAAAATGCTTACAAAAATTTCACCTGAATGCTGATTGGGAACTCAGCTCTTTACAGCAATAGATACAGTATACACGGTTTATTGGGATTTCGAAGAATTCTACGAGAAATAAATATACAAACATCATGGCATCCTTTTTCACACGGCGAGCTAGCTACAAGGCAACTGGTAACAAAACATGGTACTGGATGTCTGAATGCTTCCTCAATGTGTCTTGTGAATATTTGGAAACAGTCCATGAATGTGCTCCGGCATGAAATCGTGCCTCGTGAGGATCCCAACAATGGGAGGTCTTCCTGGTGTCTTGGGCACAACCAGTAGGTGCCTTAGTCCTAGTGCCCGGAAAAGGACCGCAGCCTTTGCAAGTGACATGG…	gz_contig_1195	100	1682	gi|413918405|gb|AFW58337.1|
aj_contig_994	CGCCGGTGCCGCGGTGATGGGAGTATTCAAGTACAATTTCGCGGCGCAGTTCCTCTCGAGAGTCCTCCCGTTCCTCTTCAACATATGGTTCGTGCGCCAGCTCGGCAAGGACGACTCCGCGGTGTCGGCATATGCACTGCAACTTCCTCTATTAATCAGAACCATCTTATTTGTAAGCCGAGAGGGGTTTCGCCGTGCATGTTTGCGCAATGATTCCCAGAGTGGTGATATGTTGACTGATGAAGCAGTGCTAAAGGTGGCTTGGGTGGTAATTCCATTTGGCATCTTTATTACTTCTGTATGCTGCCTATTTGTGTTGGCTTTAAAGAAACTGAAGTTATCTGACGAATATGCAAAAGCTACACTGATCATCGGCTTTGCTTGTGTTCTGGAATTATT…	gz_contig_65	99.57	1397	gi|293332779|ref|NP_001169121.1|
aj_contig_995	CCCGACTTCATGGCCCTGCCCCTTGAGGAGGACATCTTCGAGTGGCAATTTGCCATTCTGGGGCCACGAGACAGCGAGTTTGAGGGTGGAATCTACCATGGCAGGATTCAGCTTCCCTCAGACTATCCATTTAAGCCACCATCCTTCATGCTGCTCACGCCAAGTGGACGATTTGAGATTCAGAAGAAAATATGTTTGAGCATATCCAATTACCATCCTGAGCACTGGCAGCCATCATGGAGTGTGCGCACAGCGCTAGTCGCCTTAATTGCATTCATGCCAACAAACCCTGGTGGGGCACTGGGCTCCCTGGACTACAAAAAGGAAGATAGACGGGCACTTGCTATCAAATCACGTGAAGCACCGCCAAAATTTGGTTCCCCTGAACGCCAGAAACTA…	gz_contig_9400	99.51	611	gi|414866466|tpg|DAA45023.1|
[truncated: 20,427 more rows]
